# Supplementary material for: Diastereoselective thia-[3 + 2] cyclization of acetylpyranuloses and β-oxodithioesters
Source: Royal Society of Chemistry journal article supplement (doi:10.1039/d5ob00022j), 2025-01-01
Supplement: d5ob00022j1.pdf [file d5ob00022j1.pdf]

## Supplementary Information

### Diastereoselectivity thia-[3+2] cyclization of acetylpyranuloses and $\beta$ -oxodithioesters

Shihao Cheng, <sup>†ab</sup> Xiao Ni, <sup>†a</sup> Guanyou Cui, <sup>b</sup> Chenhu Dong, <sup>a</sup> Yujie Ma, <sup>a</sup> Jinlong Li, <sup>a</sup> Xiaofeng Bao\*<sup>a</sup> and Yu Zhao\*<sup>a</sup>

<sup>a</sup> School of Pharmacy, Nantong University, Nantong 226001, China.

<sup>b</sup> Jiangsu Key Laboratory of Bioactive Natural Product Research, State Key Laboratory of Natural Medicines, Department of Natural Medicinal Chemistry, China Pharmaceutical University, Nanjing 210009, People's Republic of China.

E-mail: [zhaoyu@ntu.edu.cn](mailto:zhaoyu@ntu.edu.cn).

#### Table of contents

|                                                                                                  |      |
|--------------------------------------------------------------------------------------------------|------|
| General information                                                                              | S2   |
| Complete compounds set                                                                           | S2   |
| General procedures for the synthesis of acetylpyranuloses <b>1a-e</b> and <b>2a-2j</b>           | S3   |
| General procedures for the synthesis of $\beta$ -oxodithioesters <b>3a-3e</b>                    | S4   |
| General procedures for the synthesis of thieno[2, 3- <i>b</i> ]pyran <b>4a-n</b> and <b>5a-i</b> | S5   |
| Crystallographic data and molecular structure of enantiomer <b>4</b>                             | S5   |
| Characterization data of the obtained compounds                                                  | S6   |
| NMR spectra                                                                                      | S17  |
| References                                                                                       | S126 |

## General information

All reactions in non-aqueous media were conducted under a positive pressure of dry nitrogen in glassware that had been dried in an oven prior to use, unless noted otherwise. All anhydrous solvents were purchased from Shanghai Titan Technology Co., Ltd. Thin layer chromatography (Spec). A silica gel plate (100×25mm, GF254, 0.23mm, 5-20μm) was purchased from Yantai Huayang New Material Technology Co., Ltd. Flash column chromatography was performed using silica gel (200-300 mesh). The Phosphomolybdic acid (5% phosphomolybdic acid + 95% ethanol) was utilized for color development, and the light absorption effect of the product was observed using a portable UV analyzer.  $^1\text{H}$  and  $^{13}\text{C}$  nuclear magnetic resonance spectra (NMR) were obtained on a Bruker 400 MHz spectrometer. The spectra were recorded in parts per million (ppm) downfield of tetramethylsilane (TMS) ( $\delta = 0$ ) in  $\text{CDCl}_3$  and  $\text{DMSO}-d_6$ , unless otherwise specified. Signal splitting patterns are described as singlet (s), doublet (d), triplet (t), quartet (q), quintet (quint), or multiplet (m), with coupling constants (J) in hertz. High-resolution mass spectra (HRMS) and X-ray single crystal diffraction were performed by Sanguan Technology Service (Guangzhou) Co., Ltd. HRMS data for new compounds were acquired in the mass spectrometer equipped with TOF analyzer. High-resolution mass spectra (HRMS) were recorded using Electron Impact (EI), Fast Atom Bombardment (FAB) or Electrospray Ionization (ESI) techniques. The parent ion  $[\text{M}]^+$  is quoted with the indicated cation.

## Complete compounds set

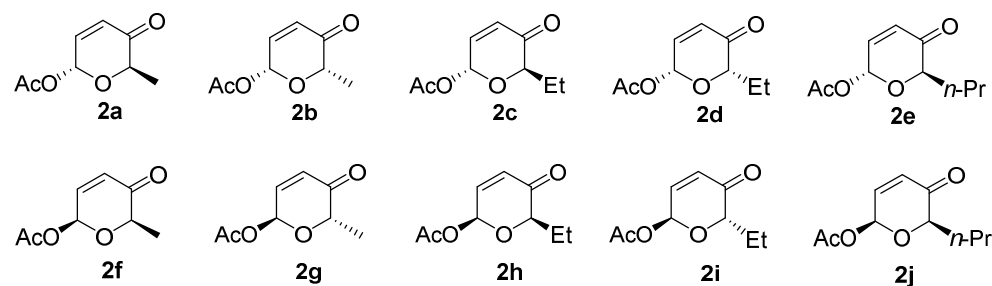

**Figure S1** Acetylpyranulose substrates **2a-2j**.

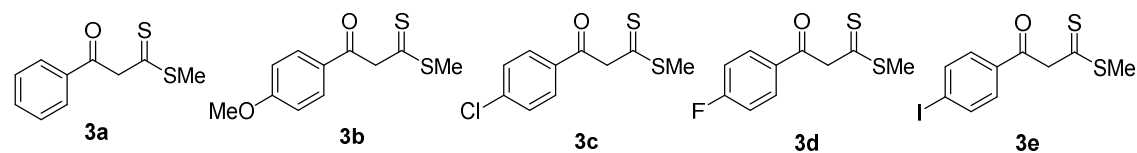

**Figure S2**  $\beta$ -oxodithioester substrates **3a-3e**.

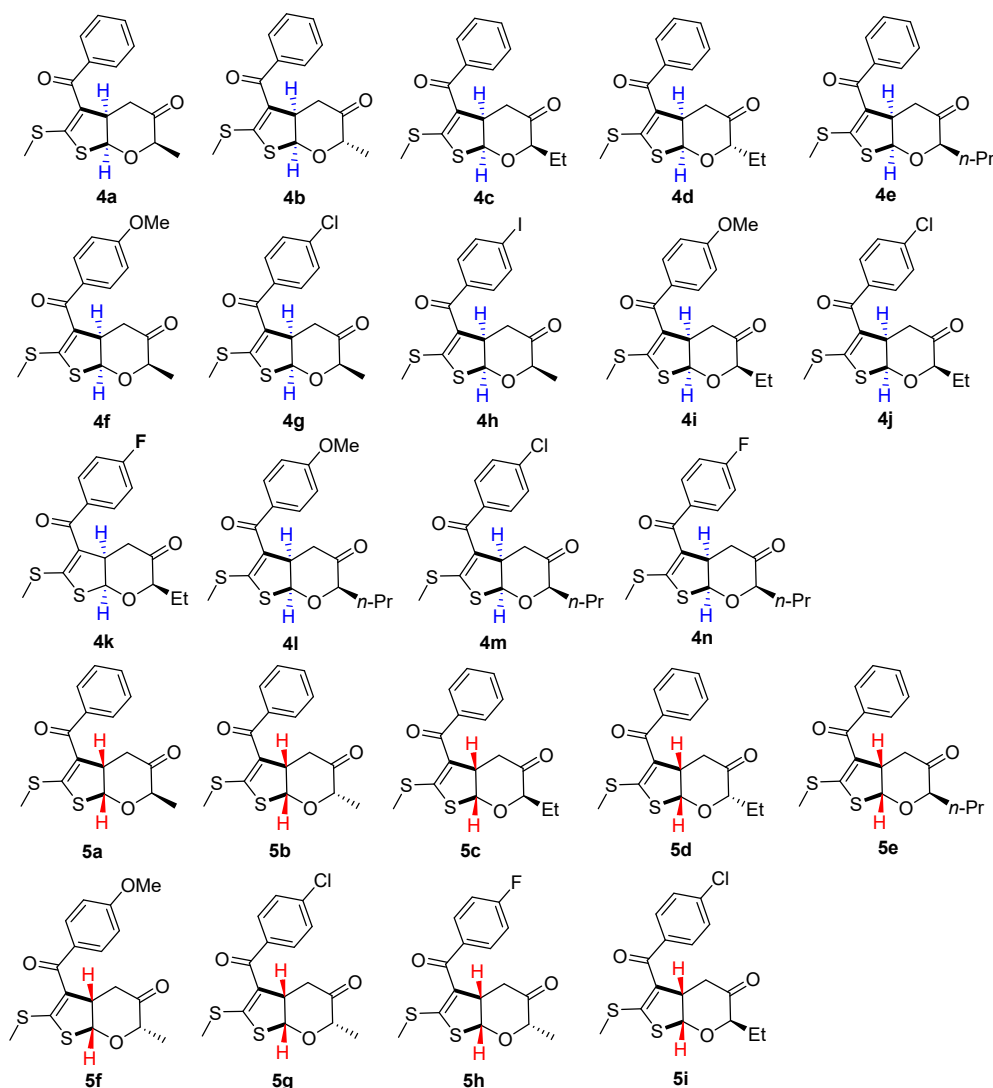

**Figure S3** Thieno[2, 3-*b*]pyran products **4a-4n** and **5a-5i**.

**General procedures for the synthesis of acetylpyranuloses **1a-e** and **2a-2j** <sup>[1]</sup>**

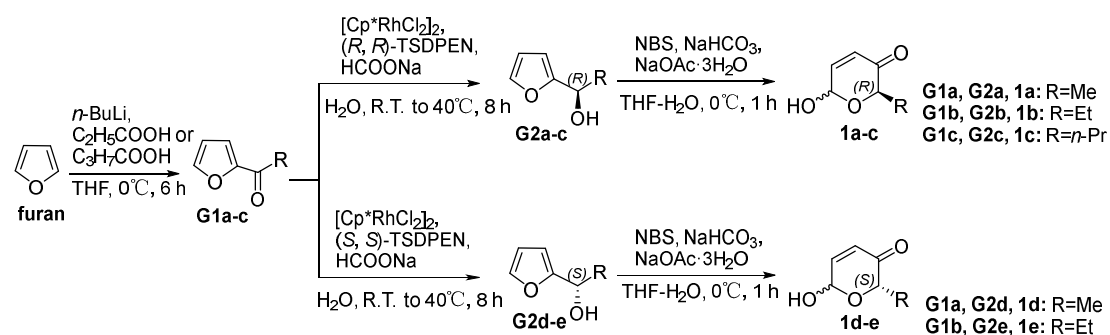

**Scheme S1** Synthesis of substrates **1a-e**. (**1b** as an example)

**Step 1:** *n*-Butyllithium (33 mL, 80 mmol, 3.0 eq.) was added dropwise to furan (20.7 mL, 287 mmol, 11.0 eq.) at 0°C and stirred for 3 hours. Then, 25 mL anhydrous tetrahydrofuran and propanoic acid (1.97 mL, 26 mmol, 1.0 eq.) were slowly added at 0°C. After stirring for 30 minutes, the mixture was allowed to gradually return to room temperature and stirred for another 3 hours. After the reaction was complete, quenched with water and extracted with EA (20 mL×3). The organic layer was dried over

Na<sub>2</sub>SO<sub>4</sub> and concentrated under vacuum. The residue was purified by column chromatography (PE:EA=30:1) to obtain **G1b** (yellow oil, 2.1 g, yield 64%).

**Step 2:** [Cp\*RhCl<sub>2</sub>]<sub>2</sub> (10 mg, 0.1% mmol) and (*R, R*)-TSDPEN (44 mg, 1% mmol) were added in water (50 mL) and the mixture was stirred for 1.5 hours at 40°C. **G1b** (1.1 g, 10 mmol, 1.0 eq.) and sodium formate (13.5 g, 20 mmol, 2.0 eq.) were added to the mixture and stirred for 12 hours. The crude reaction mixture was extracted with EA (20 mL×3) and the organic layer was dried over Na<sub>2</sub>SO<sub>4</sub>, concentrated under vacuum. The residue was purified by column chromatography (PE:EA=40:1) to get **G2b** (colorless oil, 0.9 g, yield 81.2%).

**Step 3:** To a solution of **G2b** (1.06 g, 10 mmol, 1.0 eq.) in THF-H<sub>2</sub>O (40 mL, THF:H<sub>2</sub>O=3:1), NaHCO<sub>3</sub> (1.62 g, 20 mmol, 2.0 eq.), NaOAc·3H<sub>2</sub>O (1.3 g, 10 mmol, 1.0 eq.), and NBS (1.71 g, 10 mmol, 1.0 eq.) were added and the mixture was stirred for 1 hour. After the reaction was complete, the crude reaction mixture was quenched with water, extracted with EA (20 mL×3), and the organic layer was dried over Na<sub>2</sub>SO<sub>4</sub>, concentrated under vacuum. The residue was purified by column chromatography (PE:EA=40:1) to get **1b** (light yellow oil, 0.85 g, yield 69%).

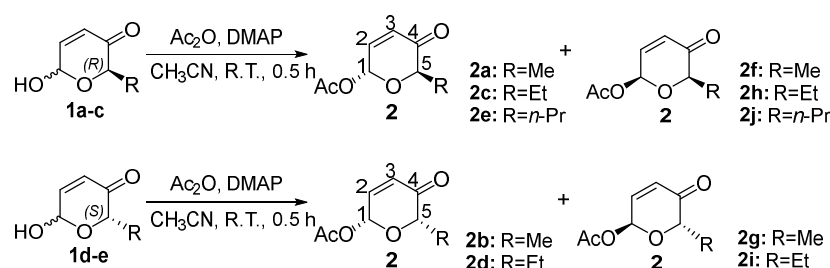

**Scheme S2** Synthesis of substrates **2a-j**. (**2c** as an example)

**Step 4:** To a solution of **1b** (1 g, 7.03 mmol, 1.0 eq.) in ethanol (20 mL), Ac<sub>2</sub>O (1.08 g, 10.55 mmol, 1.0 eq.) and DMAP (99 mg, 0.7 mmol, 0.1 eq.) were added and the mixture was stirred for 30 minutes at 40°C. After the reaction was complete, the crude reaction mixture was extracted with EA (20 mL×3), the organic layer was dried over Na<sub>2</sub>SO<sub>4</sub> and concentrated under vacuum. The residue was purified by column chromatography (PE:EA=30:1) to obtain **2c** and **2h** (**2c:2h**=3:1).

### General procedures for the synthesis of $\beta$ -oxodithioesters **3a-3e**

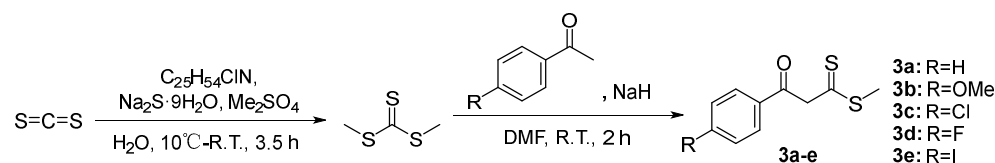

**Scheme S3** Synthesis of substrates **3a-e**. (**3a** as an example)

**Step1:** Na<sub>2</sub>S·9H<sub>2</sub>O (6.31 g, 26.27 mmol, 1.0 eq.), CS<sub>2</sub> (2.0 g, 26.27 mmol, 1.0 eq.) and methyl trioctylammonium chloride (0.05 g, 0.26 mmol, 1.0 eq.) were dissolved in water and then the mixture was stirred for 1.5 hours at room temperature. Subsequently, Me<sub>2</sub>SO<sub>4</sub> (6.63 g, 52.56 mmol, 2.0 eq.) was added to the mixture and stirred for another 1 hour at 10°C, 1 hour at room temperature. After the reaction was complete, the crude reaction mixture was extracted with EA (20 mL×3), the organic layer was dried over Na<sub>2</sub>SO<sub>4</sub> and concentrated under vacuum. The residue was purified by flash chromatography (petroleum ether) to get dimethyl carbonotrithioate (yellow oil, 0.72 g, yield 51.4%).

**Step2:** To a solution of dimethyl carbonotrithioate (0.58 g, 4.16 mmol, 1.0 eq.) in anhydrous DMF, NaH (0.20 g, 8.32 mmol, 2.0 eq.) and C<sub>8</sub>H<sub>8</sub>O (0.50 g, 4.16 mmol, 1.0 eq.) were added at room temperature,



and the mixture was stirred for 2 hours. After the reaction was complete, the reaction mixture was subsequently acidified with 5N HCl, pH 2-3. The resulting mixture was extracted with EA (20 mL×3), the organic layer was dried over Na<sub>2</sub>SO<sub>4</sub> and concentrated under vacuum. The residue was purified through column chromatography (petroleum ether) to get **3a** (yellow solid, 0.62 g, yield 81%).

#### General procedures for the synthesis of thieno[2, 3-*b*]pyran **4a-n** and **5a-i**

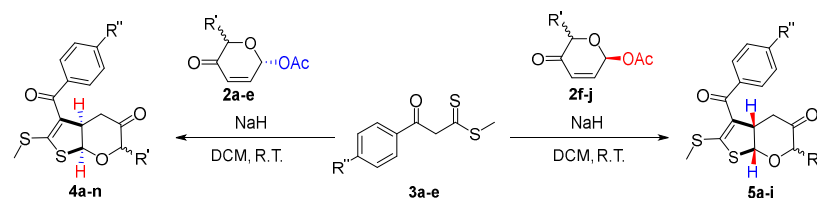

**Scheme S4** Synthesis of substrates **4a-n** and **5a-i**. (**4a** as an example)

To a solution of **3a** (0.10g, 0.47mmol, 1.0 eq.) and **2a** (0.08g, 0.47 mmol, 1.0 eq.) in anhydrous DCM (3.0 mL), NaH (0.01g, 0.47 mmol, 1.0 eq.) was added slowly under nitrogen atmosphere, and the resulting mixture was stirred for ten minutes at 0°C, then allowed to return to room temperature and stirred for 12 hours. After the reaction was complete, the mixture was concentrated under reduced pressure. The residue was purified by flash chromatography (PE:EA=30:1, *R<sub>f</sub>*=0.1) to obtain **4a** (white powder, 0.06 g, yield 60.4%).

#### Crystallographic data and molecular structure of enantiomer **4** (Deposition Number 2402947)

The crystal of **4** for X-ray diffraction study has been obtained through the dissolving of compound in PE-EA, followed by slow evaporation of the solvent at room temperature. The crystal was kept at 150 K during data collection.

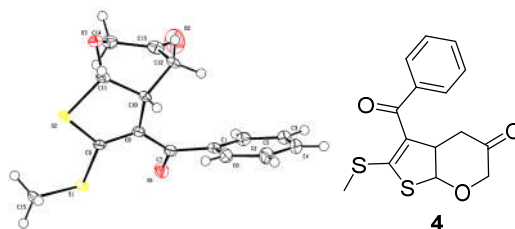

**Figure S4** X-ray crystal structure of **4**; the ellipsoids depicted at the 50% probability level.

**Table S1** Crystal data and structure refinement for **4**.

|                       |                                                               |
|-----------------------|---------------------------------------------------------------|
| Identification code   | <b>4</b>                                                      |
| Empirical formula     | C <sub>15</sub> H <sub>14</sub> O <sub>3</sub> S <sub>2</sub> |
| Formula weight        | 306.38                                                        |
| Temperature/K         | 149.99(10)                                                    |
| Crystal system        | triclinic                                                     |
| Space group           | P-1                                                           |
| a/Å                   | 6.1960(3)                                                     |
| b/Å                   | 10.6217(6)                                                    |
| c/Å                   | 11.3470(6)                                                    |
| α/°                   | 82.619(4)                                                     |
| β/°                   | 74.785(5)                                                     |
| γ/°                   | 73.760(5)                                                     |
| Volume/Å <sup>3</sup> | 690.62(7)                                                     |
| Z                     | 2                                                             |

|                                                       |                                                               |
|-------------------------------------------------------|---------------------------------------------------------------|
| $\rho_{\text{calc}}/\text{g}/\text{cm}^3$             | 1.473                                                         |
| $\mu/\text{mm}^{-1}$                                  | 3.536                                                         |
| F(000)                                                | 320.0                                                         |
| Crystal size/ $\text{mm}^3$                           | $0.15 \times 0.13 \times 0.12$                                |
| Radiation                                             | Cu K $\alpha$ ( $\lambda = 1.54184$ )                         |
| 2 $\theta$ range for data collection/ $^\circ$        | 8.09 to 148.326                                               |
| Index ranges                                          | $-6 \leq h \leq 7, -13 \leq k \leq 13, -14 \leq l \leq 13$    |
| Reflections collected                                 | 4814                                                          |
| Independent reflections                               | 2708 [ $R_{\text{int}} = 0.0381, R_{\text{sigma}} = 0.0375$ ] |
| Data/restraints/parameters                            | 2708/0/183                                                    |
| Goodness-of-fit on $F^2$                              | 1.071                                                         |
| Final R indexes [ $I \geq 2\sigma(I)$ ]               | $R_1 = 0.0574, wR_2 = 0.1588$                                 |
| Final R indexes [all data]                            | $R_1 = 0.0586, wR_2 = 0.1612$                                 |
| Largest diff. peak/hole / $\text{e } \text{\AA}^{-3}$ | 0.51/-0.66                                                    |

#### Crystal structure determination of 4

**Crystal Data** for  $\text{C}_{15}\text{H}_{14}\text{O}_3\text{S}_2$  ( $M = 306.38$  g/mol): triclinic, space group P-1 (no. 2),  $a = 6.1960(3)$  Å,  $b = 10.6217(6)$  Å,  $c = 11.3470(6)$  Å,  $\alpha = 82.619(4)^\circ$ ,  $\beta = 74.785(5)^\circ$ ,  $\gamma = 73.760(5)^\circ$ ,  $V = 690.62(7)$  Å<sup>3</sup>,  $Z = 2$ ,  $T = 149.99(10)$  K,  $\mu(\text{Cu K}\alpha) = 3.536$  mm<sup>-1</sup>,  $D_{\text{calc}} = 1.473$  g/cm<sup>3</sup>, 4814 reflections measured ( $8.09^\circ \leq 2\theta \leq 148.326^\circ$ ), 2708 unique ( $R_{\text{int}} = 0.0381, R_{\text{sigma}} = 0.0375$ ) which were used in all calculations. The final  $R_1$  was 0.0574 ( $I > 2\sigma(I)$ ) and  $wR_2$  was 0.1612 (all data).

#### Characterization data of the obtained compounds

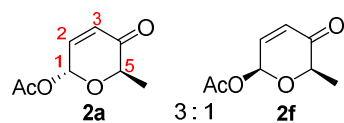

(2*R*,6*R*)-6-methyl-5-oxo-5,6-dihydro-2*H*-pyran-2-yl acetate (**2a**): colorless oil, 0.85 g, 66.7% yield,  $R_f = 0.6$  (PE:EA=2:1). <sup>1</sup>H NMR (400 MHz, CDCl<sub>3</sub>)  $\delta$  6.89 (dd,  $J = 10.2, 3.7$  Hz, 1H, H-2), 6.49 (d,  $J = 3.6$  Hz, 1H, H-1), 6.22 (d,  $J = 10.2$  Hz, 1H, H-3), 4.61 (q,  $J = 6.7$  Hz, 1H, H-5), 2.15 (s, 3H, COCH<sub>3</sub>), 1.42 (d,  $J = 6.8$  Hz, 3H, 5-CH<sub>3</sub>). The data of <sup>1</sup>H NMR is consistent with the literature.<sup>[1]</sup>

(2*S*,6*R*)-6-methyl-5-oxo-5,6-dihydro-2*H*-pyran-2-yl acetate (**2f**): colorless oil, 0.42 g, 33.3% yield,  $R_f = 0.7$  (PE:EA=2:1). <sup>1</sup>H NMR (400 MHz, CDCl<sub>3</sub>)  $\delta$  6.88 (dd,  $J = 10.3, 2.4$  Hz, 1H, H-2), 6.56 (d,  $J = 2.4$ , 1H, H-1), 6.24 (d,  $J = 10.3$  Hz, 1H, H-3), 4.38 (q,  $J = 7.0$  Hz, 1H, H-5), 2.16 (s, 3H, COCH<sub>3</sub>), 1.50 (d,  $J = 7.0$  Hz, 3H, 5-CH<sub>3</sub>). The data of <sup>1</sup>H NMR is consistent with the literatures.<sup>[1]</sup>

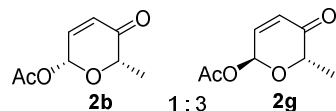

(2*R*,6*S*)-6-methyl-5-oxo-5,6-dihydro-2*H*-pyran-2-yl acetate (**2b**): colorless oil, 0.88 g, 31.8% yield,  $R_f = 0.7$  (PE:EA=1:1). <sup>1</sup>H NMR (400 MHz, Chloroform-*d*)  $\delta$  6.89 (dd,  $J = 10.4, 2.4$  Hz, 1H, H-2), 6.56 (d,  $J = 2.4$  Hz, 1H, H-1), 6.24 (d,  $J = 10.4$  Hz, 1H, H-3), 4.38 (q,  $J = 7.0$  Hz, 1H, H-5), 2.16 (s, 3H, COCH<sub>3</sub>), 1.50 (d,  $J = 7.0$  Hz, 3H, 5-CH<sub>3</sub>).

(2*S*,6*S*)-6-methyl-5-oxo-5,6-dihydro-2*H*-pyran-2-yl acetate (**2g**): colorless oil, 0.41 g, 68.2% yield,  $R_f = 0.6$  (PE:EA=1:1). <sup>1</sup>H NMR (400 MHz, Chloroform-*d*)  $\delta$  6.88 (dd,  $J = 10.2, 3.7$  Hz, 1H, H-2), 6.48 (d,  $J = 3.7$  Hz, 1H, H-1), 6.21 (d,  $J = 10.2$  Hz, 1H, H-3), 4.60 (q,  $J = 6.7$  Hz, 1H, H-5), 2.14 (s, 3H, COCH<sub>3</sub>), 1.41 (d,  $J = 6.7$  Hz, 3H, 5-CH<sub>3</sub>). The data of <sup>1</sup>H NMR is consistent with the literature.<sup>0</sup>

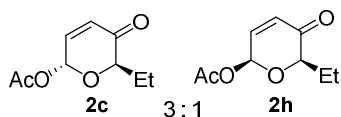

(2*R*,6*R*)-6-ethyl-5-oxo-5,6-dihydro-2*H*-pyran-2-yl acetate (**2c**): colorless oil, 1.15 g, 65.6% yield,  $R_f$  = 0.7 (PE:EA=2:1).  $^1\text{H}$  NMR (400 MHz,  $\text{CDCl}_3$ )  $\delta$  6.90 (dd,  $J$  = 10.2, 3.7 Hz, 1H, H-2), 6.52 (d,  $J$  = 3.6 Hz, 1H, H-1), 6.21 (d,  $J$  = 10.2 Hz, 1H, H-3), 4.43 (dd,  $J$  = 6.9, 4.0 Hz, 1H, H-5), 2.14 (s, 3H,  $\text{COCH}_3$ ), 1.96 (dq,  $J$  = 15.1, 7.6, 4.2 Hz, 1H,  $\text{CH}_2\text{CH}_3$ ), 1.81 (dp,  $J$  = 14.4, 7.3 Hz, 1H,  $\text{CH}_2\text{CH}_3$ ), 0.97 (t,  $J$  = 7.4 Hz, 3H,  $\text{CH}_3$ ).  $^{13}\text{C}$  NMR (100 MHz,  $\text{CDCl}_3$ )  $\delta$  195.6, 169.6, 141.6, 128.8, 87.1, 76.8, 23.0, 21.0, 9.0.

(2*S*,6*R*)-6-ethyl-5-oxo-5,6-dihydro-2*H*-pyran-2-yl acetate (**2h**): colorless oil, 0.60 g, 34.4% yield,  $R_f$  = 0.6 (PE:EA=2:1).  $^1\text{H}$  NMR (400 MHz,  $\text{CDCl}_3$ )  $\delta$  6.85 (dt,  $J$  = 10.4, 2.6 Hz, 1H, H-2), 6.56 (dd,  $J$  = 2.8, 1.3 Hz, 1H, H-1), 6.22 (d,  $J$  = 10.4, 1H, H-3), 4.15 (dd,  $J$  = 7.8, 6.2 Hz, 1H, H-5), 2.15 (s,  $J$  = 1.2 Hz, 3H,  $\text{COCH}_3$ ), 1.89 (p,  $J$  = 7.4 Hz, 2H,  $\text{CH}_2\text{CH}_3$ ), 1.03 (t,  $J$  = 7.4 Hz, 3H,  $\text{CH}_3$ ).  $^{13}\text{C}$  NMR (100 MHz,  $\text{CDCl}_3$ )  $\delta$  195.6, 169.6, 141.6, 128.8, 87.1, 76.9, 23.0, 21.0, 9.0.

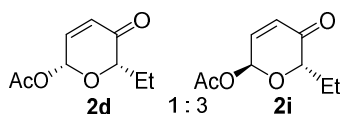

(2*R*,6*S*)-6-ethyl-5-oxo-5,6-dihydro-2*H*-pyran-2-yl acetate (**2d**): colorless oil, 0.48 g, 32.8% yield,  $R_f$  = 0.6 (PE:EA=2:1).  $^1\text{H}$  NMR (400 MHz, Chloroform-*d*)  $\delta$  6.84 (dd,  $J$  = 10.4, 2.7 Hz, 1H, H-2), 6.55 (d,  $J$  = 2.7 Hz, 1H, H-1), 6.21 (d,  $J$  = 10.4 Hz, 1H, H-3), 4.14 (dd,  $J$  = 7.8, 6.2 Hz, 1H, H-5), 2.14 (s, 3H,  $\text{COCH}_3$ ), 1.88 (p,  $J$  = 7.4 Hz, 2H,  $\text{CH}_2\text{CH}_3$ ), 1.02 (t,  $J$  = 7.4 Hz, 3H,  $\text{CH}_3$ ).  $^{13}\text{C}$  NMR (100 MHz,  $\text{CDCl}_3$ )  $\delta$  195.7, 169.4, 142.8, 128.4, 87.6, 80.9, 26.3, 21.1, 9.9.

(2*S*,6*S*)-6-ethyl-5-oxo-5,6-dihydro-2*H*-pyran-2-yl acetate (**2i**): colorless oil, 0.98 g, 67.2% yield,  $R_f$  = 0.7 (PE:EA=2:1).  $^1\text{H}$  NMR (400 MHz,  $\text{CDCl}_3$ )  $\delta$  6.90 (dd,  $J$  = 10.2, 3.7 Hz, 1H, H-2), 6.52 (d,  $J$  = 3.7 Hz, 1H, H-1), 6.22 (d,  $J$  = 10.2 Hz, 1H, H-3), 4.43 (dd,  $J$  = 6.9, 4.1 Hz, 1H, H-5), 2.14 (s, 3H,  $\text{COCH}_3$ ), 1.96 (ddd,  $J$  = 14.6, 7.4, 4.1 Hz, 1H,  $\text{CH}_2\text{CH}_3$ ), 1.81 (dp,  $J$  = 14.4, 7.2 Hz, 1H,  $\text{CH}_2\text{CH}_3$ ), 1.65 (s, 3H,  $\text{CH}_3$ ).  $^{13}\text{C}$  NMR (100 MHz,  $\text{CDCl}_3$ )  $\delta$  195.6, 169.6, 141.6, 128.7, 87.1, 76.8, 23.0, 20.9, 8.9.

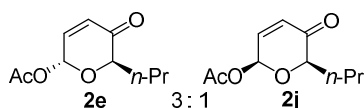

(2*R*,6*R*)-5-oxo-6-propyl-5,6-dihydro-2*H*-pyran-2-yl acetate (**2e**), colorless oil, 0.60 g, 66.7% yield,  $R_f$  = 0.7 (PE:EA=2:1).  $^1\text{H}$  NMR (400 MHz,  $\text{DMSO}-d_6$ )  $\delta$  7.10 (dd,  $J$  = 10.2, 3.7 Hz, 1H, H-2), 6.46 (d,  $J$  = 3.7 Hz, 1H, H-1), 6.25 (d,  $J$  = 10.3 Hz, 1H, H-3), 4.48 (dd,  $J$  = 7.7, 3.8 Hz, 1H, H-5), 2.10 (s, 3H,  $\text{COCH}_3$ ), 1.84 – 1.70 (m, 1H), 1.58 (dtd,  $J$  = 14.1, 8.3, 6.1 Hz, 1H), 1.40 – 1.28 (m, 2H), 0.86 (t,  $J$  = 7.4 Hz, 3H,  $\text{CH}_3$ ).  $^{13}\text{C}$  NMR (100 MHz,  $\text{CDCl}_3$ )  $\delta$  195.8, 169.6, 141.5, 128.7, 87.2, 75.6, 31.7, 21.3, 17.5, 13.8.

(2*S*,6*R*)-5-oxo-6-propyl-5,6-dihydro-2*H*-pyran-2-yl acetate (**2j**), colorless oil, 1.22 g, 33.3% yield,  $R_f$  = 0.6 (PE:EA=2:1).  $^1\text{H}$  NMR (400 MHz,  $\text{DMSO}$ )  $\delta$  7.09 (dd,  $J$  = 10.3, 2.5 Hz, 1H, H-2), 6.53 (d,  $J$  = 2.5, 1.4 Hz, 1H, H-1), 6.25 (d,  $J$  = 10.3, 1H, H-3), 4.30 (dd,  $J$  = 8.6, 5.2 Hz, 1H, H-5), 2.10 (s, 3H,  $\text{COCH}_3$ ), 1.74 – 1.64 (m, 2H), 1.37 (dhept,  $J$  = 13.2, 6.8, 6.4 Hz, 2H), 0.88 (t,  $J$  = 7.4 Hz, 3H,  $\text{CH}_3$ ).  $^{13}\text{C}$  NMR (100 MHz,  $\text{CDCl}_3$ )  $\delta$  195.8, 169.6, 141.2, 128.7, 87.3, 75.9, 31.7, 21.0, 17.9, 14.0.

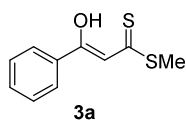

methyl (*Z*)-3-hydroxy-3-phenylprop-2-enedithioate (**3a**), yellow solid, 425.4 mg, 80.4% yield.  $R_f$  = 0.4

(PE).  $^1\text{H}$  NMR (400 MHz,  $\text{CDCl}_3$ )  $\delta$  15.10 (s, 1H, Bn-OH), 7.88 (d,  $J = 7.3$  Hz, 2H, ArH), 7.54 – 7.48 (m, 1H, ArH), 7.44 (dd,  $J = 8.3, 6.5$  Hz, 2H, ArH), 6.96 (s, 1H, CH), 2.65 (s, 3H,  $\text{SCH}_3$ ). The data of  $^1\text{H}$  NMR is consistent with the literature.<sup>[3]</sup>

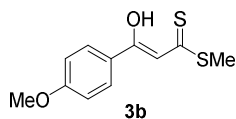

methyl (Z)-3-hydroxy-3-(4-methoxyphenyl)prop-2-enedithioate (**3b**), yellow solid, 393.8 mg, 78.8% yield.  $R_f=0.5$  (PE),  $^1\text{H}$  NMR (400 MHz,  $\text{CDCl}_3$ )  $\delta$  15.19 (s, 1H, Bn-OH), 7.86 (d,  $J = 8.8$  Hz, 2H, ArH), 6.94 (s, 1H, CH), 6.97 – 6.92 (m, 2H, ArH), 3.87 (s, 3H,  $\text{OCH}_3$ ), 2.65 (s, 3H,  $\text{CH}_3$ ). The data of  $^1\text{H}$  NMR is consistent with the literature.<sup>[3]</sup>

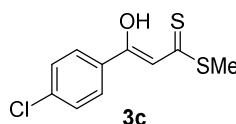

methyl (Z)-3-(4-chlorophenyl)-3-hydroxyprop-2-enedithioate (**3c**), yellow solid, 434.7 mg, 82.4% yield.  $R_f=0.4$  (PE),  $^1\text{H}$  NMR (400 MHz,  $\text{CDCl}_3$ )  $\delta$  15.07 (s, 1H, Bn-OH), 7.85 – 7.78 (m, 2H, ArH), 7.47 – 7.38 (m, 2H, ArH), 6.91 (s, 1H, CH), 2.66 (s, 3H,  $\text{CH}_3$ ). The data of  $^1\text{H}$  NMR is consistent with the literature.<sup>[3]</sup>

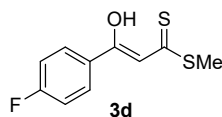

methyl (Z)-3-(4-fluorophenyl)-3-hydroxyprop-2-enedithioate (**3d**), yellow solid, 419.5 mg, 81.7% yield.  $R_f=0.61$  (PE),  $^1\text{H}$  NMR (400 MHz,  $\text{CDCl}_3$ )  $\delta$  15.11 (s, 1H, Bn-OH), 7.94 – 7.85 (m, 2H, ArH), 7.19 – 7.09 (m, 2H, ArH), 6.90 (s, 1H, CH), 2.66 (s, 3H,  $\text{CH}_3$ ). The data of  $^1\text{H}$  NMR is consistent with the literature.<sup>[4]</sup>

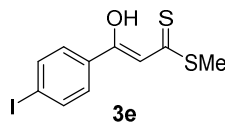

methyl (Z)-3-hydroxy-3-(4-iodophenyl)prop-2-enedithioate (**3e**), yellow solid, 398.7 mg, 77.6% yield,  $R_f=0.8$  (PE).  $^1\text{H}$  NMR (400 MHz,  $\text{CDCl}_3$ )  $\delta$  15.04 (s, 1H, Bn-OH), 7.87 – 7.76 (m, 2H, ArH), 7.63 – 7.56 (m, 2H, ArH), 6.91 (s, 1H, CH), 2.66 (s, 3H,  $\text{CH}_3$ ). The data of  $^1\text{H}$  NMR is consistent with the literature.<sup>[3]</sup>

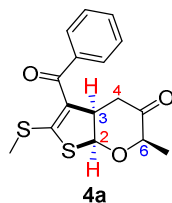

(2*R*,4*aR*,7*aS*)-5-benzoyl-2-methyl-6-(methylthio)-4*a*,7*a*-dihydro-2*H*-thieno[2,3-*b*]pyran-3(4*H*)-one (**4a**):

White powder,  $R_f=0.3$  (PE:EA=6:1), 48.9 mg, 60.4% yield. m.p. 149–151°C.  $^1\text{H}$  NMR (400 MHz,  $\text{CDCl}_3$ )  $\delta$  7.65 – 7.58 (m, 2H, ArH), 7.55 – 7.49 (m, 1H, ArH), 7.43 (dd,  $J = 8.2, 6.7$  Hz, 2H, ArH), 5.57 (d,  $J = 7.4$  Hz, 1H, H-2), 4.25 (dt,  $J = 9.5, 7.3$  Hz, 1H, H-3), 3.99 (q,  $J = 7.0$  Hz, 1H, H-6), 2.67 (dd,  $J = 14.6, 9.6$  Hz, 1H, H-4), 2.50 (dd,  $J = 14.7, 7.1$  Hz, 1H, H-4), 2.45 (s, 3H,  $\text{SCH}_3$ ), 1.38 (d,  $J = 6.9$  Hz, 3H,  $\text{CH}_3$ ).  $^{13}\text{C}$  NMR (100 MHz,  $\text{CDCl}_3$ )  $\delta$  211.1, 190.2, 156.4, 139.7, 132.0, 128.7, 128.2,

127.7, 83.7, 80.9, 51.1, 38.3, 17.6, 16.7. HRMS (ESI):  $m/z$  calcd for  $C_{16}H_{16}O_3S_2Na$ : 343.0439; found: 343.0444  $[M+Na]^+$ .

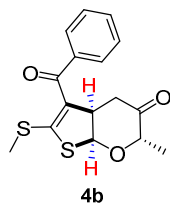

(2*S*,4*aR*,7*aS*)-5-benzoyl-2-methyl-6-(methylthio)-4*a*,7*a*-dihydro-2*H*-thieno[2,3-*b*]pyran-3(4*H*)-one (**4b**): White powder,  $R_f$ =0.3 (PE:EA=6:1), 50.1 mg, 62.3% yield. m.p. 159–160°C.  $^1H$  NMR (400 MHz,  $CDCl_3$ )  $\delta$  7.57 – 7.46 (m, 3H, ArH), 7.46 – 7.39 (m, 2H, ArH) 6.27 (d,  $J$  = 8.8 Hz, 1H, H-2), 4.57 (ddd,  $J$  = 8.5, 5.4, 2.6 Hz, 1H, H-3), 4.23 (q,  $J$  = 6.8 Hz, 1H, H-6), 2.85 (dd,  $J$  = 15.7, 5.4 Hz, 1H, H-4), 2.57 (dd,  $J$  = 15.7, 2.7 Hz, 1H, H-4), 2.41 (s, 3H, SCH<sub>3</sub>), 1.37 (d,  $J$  = 6.9 Hz, 3H, CH<sub>3</sub>).  $^{13}C$  NMR (100 MHz,  $CDCl_3$ )  $\delta$  210.8, 190.1, 157.5, 139.6, 132.1, 128.7, 128.1, 127.8, 84.7, 73.5, 49.6, 36.5, 17.8, 15.6. HRMS (ESI):  $m/z$  calcd for  $C_{16}H_{16}O_3S_2Na$ : 343.0439; found: 343.0443  $[M+Na]^+$ .

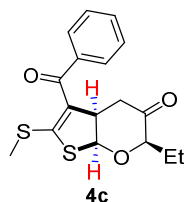

(2*R*,4*aR*,7*aS*)-5-benzoyl-2-ethyl-6-(methylthio)-4*a*,7*a*-dihydro-2*H*-thieno[2,3-*b*]pyran-3(4*H*)-one (**4c**): White powder,  $R_f$ =0.3 (PE:EA=6:1), 56.1 mg, 70.4% yield. m.p. 149–151°C.  $^1H$  NMR (400 MHz, Chloroform-*d*)  $\delta$  7.67 – 7.58 (m, 2H, ArH), 7.58 – 7.48 (m, 1H, ArH), 7.48 – 7.37 (m, 2H, ArH), 5.54 (d,  $J$  = 7.4 Hz, 1H, H-2), 4.23 (dt,  $J$  = 9.8, 7.3 Hz, 1H, H-3), 3.80 (dd,  $J$  = 7.7, 4.7 Hz, 1H, H-6), 2.60 (dd,  $J$  = 14.4, 9.9 Hz, 1H, H-4), 2.48 (dd,  $J$  = 14.4, 7.2 Hz, 1H, H-4), 2.46 (s, 3H, SCH<sub>3</sub>), 1.92 – 1.66 (m, 2H, CH<sub>2</sub>CH<sub>3</sub>), 1.00 (t,  $J$  = 7.4 Hz, 3H, CH<sub>2</sub>CH<sub>3</sub>).  $^{13}C$  NMR (100 MHz,  $CDCl_3$ )  $\delta$  211.3, 190.2, 156.8, 139.7, 131.9, 128.7, 128.1, 127.7, 85.9, 83.8, 51.9, 39.4, 24.8, 17.6, 9.7. HRMS (ESI):  $m/z$  calcd for  $C_{17}H_{18}O_3S_2Na$ : 357.0595; found: 357.0600  $[M+Na]^+$ .

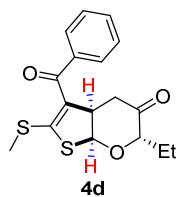

(2*S*,4*aR*,7*aS*)-5-benzoyl-2-ethyl-6-(methylthio)-4*a*,7*a*-dihydro-2*H*-thieno[2,3-*b*]pyran-3(4*H*)-one (**4d**): White powder,  $R_f$ =0.3 (PE:EA=6:1), 52.3 mg, 65.4% yield. m.p. 137–139°C.  $^1H$  NMR (400 MHz, )  $\delta$  7.55 – 7.47 (m, 3H, ArH), 7.45 – 7.38 (m, 2H, ArH), 6.31 (d,  $J$  = 8.8 Hz, 1H, H-2), 4.58 (ddd,  $J$  = 8.8, 5.3, 2.5 Hz, 1H, H-3), 4.05 (dd,  $J$  = 7.5, 3.8 Hz, 1H, , H-6), 2.80 (dd,  $J$  = 15.4, 5.3 Hz, 1H, H-4), 2.56 (dd,  $J$  = 15.4, 2.5 Hz, 1H, H-4), 2.40 (s, 3H, , SCH<sub>3</sub>), 1.92 (dq,  $J$  = 14.9, 7.5, 3.9 Hz, 1H, CH<sub>2</sub>CH<sub>3</sub>), 1.74 (dt,  $J$  = 14.4, 7.3 Hz, 1H, CH<sub>2</sub>CH<sub>3</sub>), 0.96 (t,  $J$  = 7.4 Hz, 3H, CH<sub>2</sub>CH<sub>3</sub>).  $^{13}C$  NMR (100 MHz,  $CDCl_3$ )  $\delta$  210.74, 190.1, 157.4, 139.6, 132.1, 128.6, 128.1, 127.9, 84.7, 78.1, 49.7, 37.4, 23.3, 17.8, 9.4. HRMS (ESI):  $m/z$  calcd for  $C_{17}H_{18}O_3S_2Na$ : 357.0595; found: 357.0599  $[M+Na]^+$ .

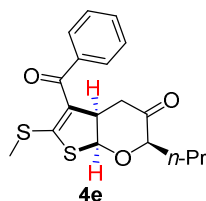

(2*R*,4*aR*,7*aS*)-5-benzoyl-6-(methylthio)-2-propyl-4*a*,7*a*-dihydro-2*H*-thieno[2,3-*b*]pyran-3(4*H*)-one (**4e**): White powder,  $R_f$ =0.3 (PE:EA=6:1), 54.8 mg, 68.5% yield. m.p. 104–106°C.  $^1\text{H}$  NMR (400 MHz, )  $\delta$  7.63 – 7.59 (m, 2H, ArH), 7.56 – 7.49 (m, 1H, ArH), 7.47 – 7.40 (m, 2H, ArH), 5.53 (d,  $J$  = 7.5 Hz, 1H, H-2), 4.23 (dt,  $J$  = 9.8, 7.3 Hz, 1H, H-3), 3.86 (dd,  $J$  = 7.0, 5.6 Hz, 1H, H-6), 2.61 (dd,  $J$  = 14.5, 10.0 Hz, 1H, H-4), 2.49 (dd,  $J$  = 14.5, 7.1 Hz, 1H, H-4), 2.46 (s, 3H, SCH<sub>3</sub>), 1.74 – 1.66 (m, 2H), 1.55 – 1.41 (m, 2H), 0.91 (t,  $J$  = 7.4 Hz, 3H, CH<sub>3</sub>).  $^{13}\text{C}$  NMR (100 MHz, CDCl<sub>3</sub>)  $\delta$  211.4, 190.2, 156.7, 139.7, 131.9, 128.7, 128.1, 127.7, 84.7, 83.8, 51.1, 39.1, 33.4, 18.5, 17.6, 13.7. HRMS (ESI):  $m/z$  calcd for C<sub>18</sub>H<sub>20</sub>O<sub>3</sub>S<sub>2</sub>Na: 371.0752; found: 371.0756 [M+Na]<sup>+</sup>.

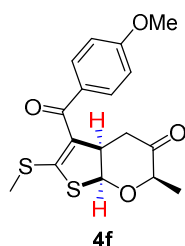

(2*R*,4*aR*,7*aS*)-5-(4-methoxybenzoyl)-2-methyl-6-(methylthio)-4*a*,7*a*-dihydro-2*H*-thieno[2,3-*b*]pyran-3(4*H*)-one (**4f**): White powder,  $R_f$ =0.4 (PE:EA=6:1), 62.7 mg, 62.7% yield. m.p. 149–151°C.  $^1\text{H}$  NMR (400 MHz, CDCl<sub>3</sub>)  $\delta$  7.69 (d,  $J$  = 8.7 Hz, 2H, ArH), 6.93 (d,  $J$  = 8.8 Hz, 2H, ArH), 5.54 (d,  $J$  = 7.3 Hz, 1H, H-2), 4.26 (dt,  $J$  = 9.1, 7.3 Hz, 1H, H-3), 4.01 (q,  $J$  = 6.8 Hz, 1H, H-6), 3.87 (s, 3H, OCH<sub>3</sub>), 2.69 (dd,  $J$  = 14.7, 9.2 Hz, 1H, H-4), 2.62 (dd,  $J$  = 14.7, 7.4 Hz, 1H, H-4), 2.42 (s, 3H, SCH<sub>3</sub>), 1.39 (d,  $J$  = 7.0 Hz, 3H, CH<sub>3</sub>).  $^{13}\text{C}$  NMR (100 MHz, CDCl<sub>3</sub>)  $\delta$  211.3, 189.5, 163.1, 151.9, 131.8, 130.7, 129.2, 113.9, 83.6, 80.9, 55.5, 51.7, 38.1, 17.5, 16.8. HRMS (ESI):  $m/z$  calcd for C<sub>17</sub>H<sub>18</sub>O<sub>4</sub>S<sub>2</sub>Na: 373.0544; found: 373.0548 [M+Na]<sup>+</sup>.

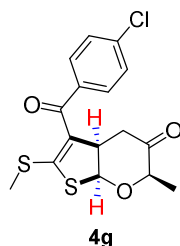

(2*R*,4*aR*,7*aS*)-5-(4-chlorobenzoyl)-2-methyl-6-(methylthio)-4*a*,7*a*-dihydro-2*H*-thieno[2,3-*b*]pyran-3(4*H*)-one (**4g**): White powder,  $R_f$ =0.3 (PE:EA=6:1), 64.3 mg, 80.4% yield. m.p. 155–157°C.  $^1\text{H}$  NMR (400 MHz, CDCl<sub>3</sub>)  $\delta$  7.60 – 7.55 (m, 2H, ArH), 7.45 – 7.39 (m, 2H, ArH), 5.57 (d,  $J$  = 7.4 Hz, 1H, H-2), 4.23 (dt,  $J$  = 9.4, 7.3 Hz, 1H, H-3), 4.01 (q,  $J$  = 7.0 Hz, 1H, H-6), 2.68 (dd,  $J$  = 14.6, 9.4 Hz, 1H, H-4), 2.58 (dd,  $J$  = 14.6, 7.2 Hz, 1H, H-4), 2.46 (s, 3H, SCH<sub>3</sub>), 1.39 (d,  $J$  = 7.0 Hz, 3H, CH<sub>3</sub>).  $^{13}\text{C}$  NMR (100 MHz, CDCl<sub>3</sub>)  $\delta$  210.9, 189.0, 156.8, 138.4, 137.9, 129.4, 129.0, 128.0, 83.6, 80.9, 51.1, 38.3, 17.7, 16.8. HRMS (ESI):  $m/z$  calcd for C<sub>16</sub>H<sub>15</sub>ClO<sub>3</sub>S<sub>2</sub>Na: 377.0049; found: 377.0053 [M+Na]<sup>+</sup>.

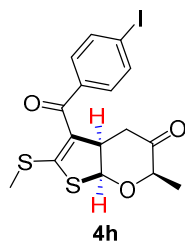

(2*R*,4*aR*,7*aS*)-5-(4-iodobenzoyl)-2-methyl-6-(methylthio)-4*a*,7*a*-dihydro-2*H*-thieno[2,3-*b*]pyran-3(4*H*)-one (**4h**):

White powder,  $R_f$ =0.3 (PE:EA=6:1), 56.9 mg, 70.7% yield. m.p. 190–191°C.  $^1\text{H}$  NMR (400 MHz,  $\text{CDCl}_3$ )  $\delta$  7.85 – 7.73 (m, 2H, ArH), 7.39 – 7.30 (m, 2H, ArH), 5.57 (d,  $J$  = 7.4 Hz, 1H, H-2), 4.22 (dt,  $J$  = 9.4, 7.3 Hz, 1H, H-3), 4.01 (q,  $J$  = 7.0 Hz, 1H, H-6), 2.67 (dd,  $J$  = 14.6, 9.4 Hz, 1H, H-4), 2.62 – 2.55 (d, 1H, H-4), 2.46 (s, 3H,  $\text{SCH}_3$ ), 1.39 (d,  $J$  = 7.0 Hz, 3H, 6- $\text{CH}_3$ ).  $^{13}\text{C}$  NMR (100 MHz,  $\text{CDCl}_3$ )  $\delta$  210.9, 189.2, 157.2, 138.9, 137.9, 129.4, 127.8, 99.3, 83.6, 80.9, 51.1, 38.3, 17.6, 16.7. HRMS (ESI):  $m/z$  calcd for  $\text{C}_{16}\text{H}_{15}\text{IO}_3\text{S}_2\text{Na}$ : 468.9405; found: 468.9407  $[\text{M}+\text{Na}]^+$ .

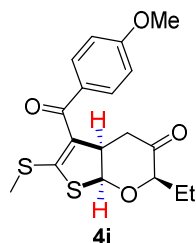

(2*R*,4*aR*,7*aS*)-2-ethyl-5-(4-methoxybenzoyl)-6-(methylthio)-4*a*,7*a*-dihydro-2*H*-thieno[2,3-*b*]pyran-3(4*H*)-one (**4i**):

White powder,  $R_f$ =0.3 (PE:EA=6:1), 62.2 mg, 77.8% yield. m.p. 99–100°C.  $^1\text{H}$  NMR (400 MHz,  $\text{CDCl}_3$ )  $\delta$  7.71 – 7.64 (m, 2H, ArH), 6.98–6.85 (m, 2H, ArH), 5.52 (d,  $J$  = 7.4 Hz, 1H, H-2), 4.24 (q,  $J$  = 8.1 Hz, 1H, H-3), 3.87 (s, 3H,  $\text{OCH}_3$ ), 3.82 (dd,  $J$  = 7.4, 4.5 Hz, 1H, H-6), 2.61 (d,  $J$  = 8.5 Hz, 2H, H-4), 2.43 (s, 3H,  $\text{SCH}_3$ ), 1.78 (m, 2H,  $\text{CH}_2\text{CH}_3$ ), 1.01 (t,  $J$  = 7.4 Hz, 3H,  $\text{CH}_2\text{CH}_3$ ).  $^{13}\text{C}$  NMR (100 MHz,  $\text{CDCl}_3$ )  $\delta$  211.4, 189.4, 163.0, 131.9, 130.5, 129.1, 113.9, 85.9, 83.7, 55.4, 51.6, 39.2, 24.8, 17.5, 9.7. HRMS (ESI):  $m/z$  calcd for  $\text{C}_{18}\text{H}_{20}\text{O}_4\text{S}_2\text{Na}$ : 387.0701; found: 387.0705  $[\text{M}+\text{Na}]^+$ .

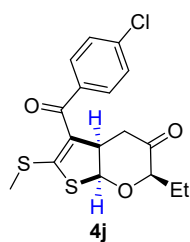

(2*R*,4*aR*,7*aS*)-5-(4-chlorobenzoyl)-2-ethyl-6-(methylthio)-4*a*,7*a*-dihydro-2*H*-thieno[2,3-*b*]pyran-3(4*H*)-one (**4j**):

White powder,  $R_f$ =0.4 (PE:EA=6:1), 63.7 mg, 79.6% yield. m.p. 114–116°C.  $^1\text{H}$  NMR (400 MHz,  $\text{CDCl}_3$ )  $\delta$  7.57 (d,  $J$  = 8.4 Hz, 2H, ArH), 7.41 (d,  $J$  = 8.4 Hz, 2H, ArH), 5.54 (d,  $J$  = 7.4 Hz, 1H, H-2), 4.21 (dt,  $J$  = 9.4, 7.5 Hz, 1H, H-3), 3.82 (dd,  $J$  = 7.7, 4.6 Hz, 1H, H-6), 2.58 (dd,  $J$  = 8.4, 6.9 Hz, 2H, H-4), 2.46 (s, 3H,  $\text{SCH}_3$ ), 1.86 – 1.71 (dq, 2H), 1.00 (t,  $J$  = 7.4 Hz, 3H,  $\text{CH}_2\text{CH}_3$ ).  $^{13}\text{C}$  NMR (100 MHz,  $\text{CDCl}_3$ )  $\delta$  211.0, 188.9, 157.1, 138.2, 137.9, 129.3, 129.1, 127.9, 85.9, 83.7, 51.1, 39.3, 24.8, 17.6, 9.7. HRMS (ESI):  $m/z$  calcd for  $\text{C}_{17}\text{H}_{17}\text{ClO}_3\text{S}_2\text{Na}$ : 391.0205; found: 391.0209  $[\text{M}+\text{Na}]^+$ .

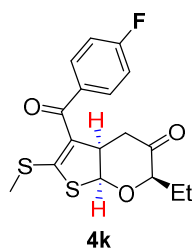

(2*R*,4*aR*,7*aS*)-2-ethyl-5-(4-fluorobenzoyl)-6-(methylthio)-4*a*,7*a*-dihydro-2*H*-thieno[2,3-*b*]pyran-3(4*H*)-one (**4k**):

White powder,  $R_f$ =0.4 (PE:EA=6:1), 60.3 mg, 75.4% yield. m.p. 119–120°C.  $^1\text{H}$  NMR (400 MHz,  $\text{CDCl}_3$ )  $\delta$  7.71 – 7.61 (m, 2H, ArH), 7.17 – 7.07 (m, 2H, ArH), 5.54 (d,  $J$  = 7.4 Hz, 1H, H-2), 4.22 (dt,  $J$  = 9.3, 7.5 Hz, 1H, H-3), 3.82 (dd,  $J$  = 7.7, 4.6 Hz, 1H, H-6), 2.59 (dd,  $J$  = 8.4, 5.6 Hz, 2H, H-4), 2.46 (s, 3H,  $\text{SCH}_3$ ), 1.90 – 1.67 (m, 2H), 1.01 (t,  $J$  = 7.4 Hz, 3H,  $\text{CH}_3$ ).  $^{13}\text{C}$  NMR (100 MHz,  $\text{CDCl}_3$ )  $\delta$  211.1, 188.9, 165.1 (d,  $J$  = 253.4 Hz), 156.1, 135.8, 130.5, 130.5, 128.2, 116.0, 115.8, 86.0, 83.7, 51.3, 39.3, 24.8, 17.6, 9.8. HRMS (ESI):  $m/z$  calcd for  $\text{C}_{17}\text{H}_{17}\text{FO}_3\text{S}_2\text{Na}$ : 375.0501; found: 375.0504  $[\text{M}+\text{Na}]^+$ .

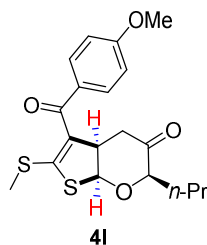

(2*R*,4*aR*,7*aS*)-5-(4-methoxybenzoyl)-6-(methylthio)-2-propyl-4*a*,7*a*-dihydro-2*H*-thieno[2,3-*b*]pyran-3(4*H*)-one (**4l**):

White powder,  $R_f$ =0.5 (PE:EA=6:1), 58.7 mg, 73.4% yield. m.p. 109–110°C.  $^1\text{H}$  NMR (400 MHz,  $\text{CDCl}_3$ )  $\delta$  7.72 – 7.63 (m, 2H, ArH), 6.98 – 6.89 (m, 2H, ArH), 5.51 (d,  $J$  = 7.4 Hz, 1H, H-2), 4.24 (dt,  $J$  = 9.2, 7.5 Hz, 1H, H-3), 3.90 – 3.84 (m, 1H, H-6), 3.87 (s, 3H,  $\text{OCH}_3$ ), 2.69 – 2.54 (m, 2H, H-4), 2.43 (s, 3H,  $\text{SCH}_3$ ), 1.78 – 1.63 (m, 2H), 1.53 – 1.42 (m, 2H), 0.92 (t,  $J$  = 7.3 Hz, 3H,  $\text{CH}_3$ ).  $^{13}\text{C}$  NMR (100 MHz,  $\text{CDCl}_3$ )  $\delta$  211.5, 189.4, 163.0, 152.3, 131.9, 130.5, 129.1, 113.9, 84.7, 83.6, 55.4, 51.6, 39.0, 33.4, 18.5, 17.5, 13.7. HRMS (ESI):  $m/z$  calcd for  $\text{C}_{19}\text{H}_{22}\text{O}_4\text{S}_2\text{Na}$ : 401.0857; found: 401.0858  $[\text{M}+\text{Na}]^+$ .

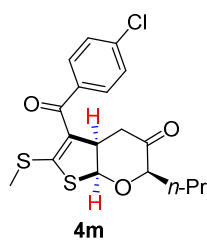

(2*R*,4*aR*,7*aS*)-5-(4-chlorobenzoyl)-6-(methylthio)-2-propyl-4*a*,7*a*-dihydro-2*H*-thieno[2,3-*b*]pyran-3(4*H*)-one (**4m**):

White powder,  $R_f$ =0.5 (PE:EA=6:1), 61.2 mg, 76.5% yield. m.p. 104–106°C.  $^1\text{H}$  NMR (400 MHz,  $\text{CDCl}_3$ )  $\delta$  7.54 – 7.48 (m, 2H, ArH), 7.46–7.39 (m, 2H, ArH), 6.30 (d,  $J$  = 8.9 Hz, 1H, H-2), 4.58 (dt,  $J$  = 8.6, 5.3, 2.6 Hz, 1H, H-3), 4.14 – 4.06 (dd, 1H, H-6), 2.82 (dd,  $J$  = 15.4, 5.4 Hz, 1H, H-4), 2.55 (dd,  $J$  = 15.4, 2.7 Hz, 1H, H-4), 2.40 (s, 3H,  $\text{SCH}_3$ ), 1.92 – 1.79 (m, 1H), 1.71 – 1.57 (m, 1H), 1.43 (dq,  $J$  = 7.4 Hz, 2H), 0.93 (t,  $J$  = 7.4 Hz, 3H,  $\text{CH}_3$ ).  $^{13}\text{C}$  NMR (100 MHz,  $\text{CDCl}_3$ )  $\delta$  211.2, 188.9, 157.2, 138.2, 137.9, 129.3, 129.0, 127.9, 84.7, 83.7, 51.1, 39.1, 33.4, 18.5, 17.6, 14.1, 13.7. HRMS (ESI):  $m/z$  calcd for  $\text{C}_{18}\text{H}_{19}\text{ClO}_3\text{S}_2\text{Na}$ : 405.0362; found: 405.0366  $[\text{M}+\text{Na}]^+$ .



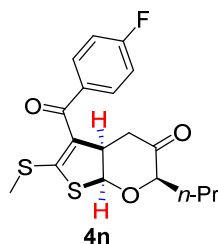

(2*R*,4*aR*,7*aS*)-5-(4-fluorobenzoyl)-6-(methylthio)-2-propyl-4*a*,7*a*-dihydro-2*H*-thieno[2,3-*b*]pyran-3(4*H*)-one (**4n**):

White yield, 65.1 mg,  $R_f$ =0.5 (PE:EA=6:1), 81.4% yield. m.p. 104–105°C.  $^1\text{H}$  NMR (400 MHz,  $\text{CDCl}_3$ )  $\delta$  7.71 – 7.62 (m, 2H, ArH), 7.16 – 7.09 (m, 2H, ArH), 5.54 (d,  $J$  = 7.5 Hz, 1H, H-2), 4.22 (dt,  $J$  = 9.6, 7.5 Hz, 1H, H-3), 3.88 (dd,  $J$  = 7.2, 5.4 Hz, 1H, H-6), 2.63 (dd,  $J$  = 14.4, 9.5 Hz, 1H, H-4), 2.56 (dd,  $J$  = 14.4, 7.3 Hz, 1H, H-4), 2.45 (s, 3H,  $\text{SCH}_3$ ), 1.71 (dq,  $J$  = 7.7, 5.6, 2.1 Hz, 2H), 1.46 (dt,  $J$  = 15.1, 7.7 Hz, 2H), 0.92 (t,  $J$  = 7.3 Hz, 3H,  $\text{CH}_3$ ).  $^{13}\text{C}$  NMR (100 MHz,  $\text{CDCl}_3$ )  $\delta$  211.2, 188.8, 165.1 (d,  $J$  = 253.3 Hz), 156.1, 135.8, 130.5, 130.4, 128.1, 115.9, 115.8, 84.7, 83.7, 51.3, 39.1, 33.4, 18.6, 17.6, 13.37. HRMS (ESI):  $m/z$  calcd for  $\text{C}_{18}\text{H}_{19}\text{FO}_3\text{S}_2\text{Na}$ : 389.0657; found: 389.0660  $[\text{M}+\text{Na}]^+$ .

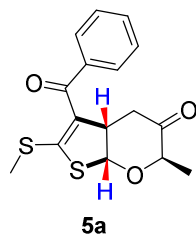

(2*R*,4*aS*,7*aR*)-5-benzoyl-2-methyl-6-(methylthio)-4*a*,7*a*-dihydro-2*H*-thieno[2,3-*b*]pyran-3(4*H*)-one (**5a**):

White powder, 63.8 mg,  $R_f$ =0.29 (PE:EA=6:1), 79.8% yield. m.p. 163–165 °C.  $^1\text{H}$  NMR (400 MHz,  $\text{CDCl}_3$ )  $\delta$  7.55 – 7.48 (m, 3H, ArH), 7.44–7.39 (m, 2H, ArH), 6.27 (dd,  $J$  = 8.8, 0.9 Hz, 1H, H-2), 4.57 (ddd,  $J$  = 8.2, 5.2, 2.5 Hz, 1H, H-3), 4.23 (q,  $J$  = 6.8 Hz, 1H, H-6), 2.85 (dd,  $J$  = 15.7, 5.3 Hz, 1H, H-4), 2.57 (dd,  $J$  = 15.7, 2.6 Hz, 1H, H-4), 2.41 (s, 3H,  $\text{CH}_3$ ), 1.37 (d,  $J$  = 6.9 Hz, 3H, 6- $\text{CH}_3$ ).  $^{13}\text{C}$  NMR (100 MHz,  $\text{CDCl}_3$ )  $\delta$  210.7, 190.0, 157.4, 139.6, 132.0, 128.9, 128.1, 127.9, 84.2, 73.4, 49.6, 36.5, 17.8, 15.6. HRMS (ESI):  $m/z$  calcd for  $\text{C}_{16}\text{H}_{16}\text{O}_3\text{S}_2\text{Na}$ : 343.0439; found: 343.0441  $[\text{M}+\text{Na}]^+$ .

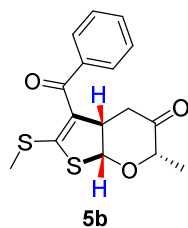

(2*S*,4*aS*,7*aR*)-5-benzoyl-2-methyl-6-(methylthio)-4*a*,7*a*-dihydro-2*H*-thieno[2,3-*b*]pyran-3(4*H*)-one (**5b**):

White powder, 60.0 mg,  $R_f$ =0.3 (PE:EA=6:1), 74.7% yield. m.p. 154–156°C.  $^1\text{H}$  NMR (400 MHz,  $\text{CDCl}_3$ )  $\delta$  7.67 – 7.58 (m, 2H, ArH), 7.56 – 7.50 (m, 1H, ArH), 7.46 – 7.40 (m, 2H, ArH), 5.57 (d,  $J$  = 7.3 Hz, 1H, H-2), 4.25 (dt,  $J$  = 9.5, 7.2 Hz, 1H, H-3), 3.99 (q,  $J$  = 7.0 Hz, 1H, H-6), 2.67 (dd,  $J$  = 14.5, 9.6 Hz, 1H, H-4), 2.50 (dd,  $J$  = 14.6, 7.2 Hz, 1H, H-4), 2.45 (s, 3H,  $\text{SCH}_3$ ), 1.38 (d,  $J$  = 6.9 Hz, 3H, 6- $\text{CH}_3$ ).  $^{13}\text{C}$  NMR (100 MHz,  $\text{CDCl}_3$ )  $\delta$  211.2, 190.2, 156.5, 139.7, 132.1, 128.1, 128.9, 128.1, 127.8, 83.7, 80.9, 77.2, 51.0, 38.3, 17.6, 16.7. HRMS (ESI):  $m/z$  calcd for  $\text{C}_{16}\text{H}_{16}\text{O}_3\text{S}_2\text{Na}$ : 343.0439; found: 343.0440  $[\text{M}+\text{Na}]^+$ .

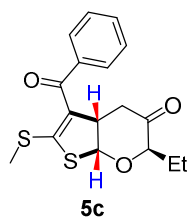

(2*R*,4*aS*,7*aR*)-5-benzoyl-2-ethyl-6-(methylthio)-4*a*,7*a*-dihydro-2*H*-thieno[2,3-*b*]pyran-3(4*H*)-one (**5c**): white powder,  $R_f$ =0.44 (PE:EA=6:1), 60.6 mg, 75.7% yield. m.p. 139–141 °C.  $^1\text{H}$  NMR (400 MHz, )  $\delta$  7.56 – 7.47 (m, 3H, ArH), 7.45 – 7.38 (m, 2H, ArH), 6.31 (d,  $J$  = 8.9 Hz, 1H, H-2), 4.58 (ddd,  $J$  = 8.7, 5.3, 2.6 Hz, 1H, H-3), 4.05 (dd,  $J$  = 7.6, 3.9 Hz, 1H, H-6), 2.81 (dd,  $J$  = 15.4, 5.4 Hz, 1H, H-4), 2.56 (dd,  $J$  = 15.5, 2.6 Hz, 1H, H-4), 2.40 (s, 3H, SCH<sub>3</sub>) 1.92 (dq,  $J$  = 14.9, 7.5, 3.8 Hz, 1H), 1.72 (dt,  $J$  = 14.6, 7.3 Hz, 1H), 0.96 (t,  $J$  = 7.4 Hz, 3H, CH<sub>3</sub>).  $^{13}\text{C}$  NMR (100 MHz, CDCl<sub>3</sub>)  $\delta$  210.7, 190.1, 157.4, 139.7, 132.1, 128.7, 128.1, 128.0, 84.8, 78.1, 49.8, 37.4, 23.4, 17.9, 9.4. HRMS (ESI):  $m/z$  calcd for C<sub>17</sub>H<sub>18</sub>O<sub>3</sub>S<sub>2</sub>Na: 357.0595; found: 357.0599 [M+Na]<sup>+</sup>.

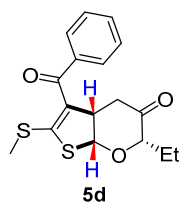

(2*S*,4*aS*,7*aR*)-5-benzoyl-2-ethyl-6-(methylthio)-4*a*,7*a*-dihydro-2*H*-thieno[2,3-*b*]pyran-3(4*H*)-one (**5d**): White powder,  $R_f$ =0.5 (PE:EA=6:1), 48.3 mg, 60.4% yield. m.p. 151–153°C.  $^1\text{H}$  NMR (400 MHz, CDCl<sub>3</sub>)  $\delta$  7.65 – 7.57 (m, 2H, ArH), 7.56 – 7.47 (m, 1H, ArH), 7.47 – 7.39 (m, 2H, ArH), 5.54 (d,  $J$  = 7.5 Hz, 1H, H-2), 4.23 (dt,  $J$  = 9.8, 7.3 Hz, 1H, H-3), 3.80 (dd,  $J$  = 7.6, 4.7 Hz, 1H, H-6), 2.59 (dd,  $J$  = 14.3, 9.9 Hz, 1H, H-4), 2.47 (dd,  $J$  = 14.2, 8.9 Hz, 1H, H-4), 2.47 (s, 3H, SCH<sub>3</sub>), 1.89 – 1.66 (m, 2H), 1.00 (t,  $J$  = 7.4 Hz, 3H, CH<sub>3</sub>).  $^{13}\text{C}$  NMR (100 MHz, CDCl<sub>3</sub>)  $\delta$  211.3, 190.3, 156.9, 139.7, 131.9, 128.1, 128.1, 127.7, 85.9, 83.8, 51.0, 39.4, 24.8, 17.6, 9.7. HRMS (ESI):  $m/z$  calcd for C<sub>17</sub>H<sub>18</sub>O<sub>3</sub>S<sub>2</sub>Na: 357.0595; found: 357.0599 [M+Na]<sup>+</sup>.

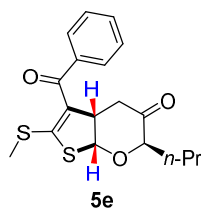

(2*R*,4*aS*,7*aR*)-5-benzoyl-6-(methylthio)-2-propyl-4*a*,7*a*-dihydro-2*H*-thieno[2,3-*b*]pyran-3(4*H*)-one (**5e**): White powder,  $R_f$ =0.5 (PE:EA=6:1), 49.9 mg, 83.2% yield. m.p. 139–141°C.  $^1\text{H}$  NMR (400 MHz, CDCl<sub>3</sub>)  $\delta$  7.56 – 7.47 (m, 3H, ArH), 7.46 – 7.38 (m, 2H, ArH), 6.30 (d,  $J$  = 8.9 Hz, 1H, H-2), 4.58 (ddd,  $J$  = 8.5, 5.4, 2.6 Hz, 1H, H-3), 4.10 (dd,  $J$  = 8.4, 3.6 Hz, 1H, H-6), 2.82 (dd,  $J$  = 15.4, 5.4 Hz, 1H, H-4), 2.55 (dd,  $J$  = 15.5, 2.6 Hz, 1H, H-4), 2.40 (s, 3H, SCH<sub>3</sub>), 1.92 – 1.79 (m, 1H), 1.71 – 1.57 (m, 1H), 1.43 (h,  $J$  = 7.4 Hz, 2H), 0.93 (t,  $J$  = 7.4 Hz, 3H, CH<sub>3</sub>).  $^{13}\text{C}$  NMR (100 MHz, CDCl<sub>3</sub>)  $\delta$  210.9, 190.1, 157.4, 139.7, 132.1, 128.7, 128.1, 128.0, 84.8, 76.9, 49.8, 37.2, 31.9, 18.3, 17.9, 13.8. HRMS (ESI):  $m/z$  calcd for C<sub>18</sub>H<sub>20</sub>O<sub>3</sub>S<sub>2</sub>Na: 371.0752; found: 371.0756 [M+Na]<sup>+</sup>.

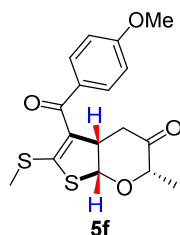

(2*S*,4*aS*,7*aR*)-5-(4-methoxybenzoyl)-2-methyl-6-(methylthio)-4*a*,7*a*-dihydro-2*H*-thieno[2,3-*b*]pyran-3(4*H*)-one (**5f**):

White powder,  $R_f$ =0.3 (PE:EA=6:1), 63.4 mg, 79.2% yield. m.p. 150–152°C.  $^1\text{H}$  NMR (400 MHz,  $\text{CDCl}_3$ )  $\delta$  7.72 – 7.64 (m, 2H, ArH), 6.96 – 6.90 (m, 2H, ArH), 5.57 – 5.51 (d,  $J$  = 7.3 Hz, 1H, H-2), 4.26 (dt,  $J$  = 8.6, 7.1 Hz, 1H, H-3), 4.01 (q,  $J$  = 7.0 Hz, 1H, H-6), 3.87 (s, 3H,  $\text{OCH}_3$ ), 2.71 – 2.59 (m, 2H, H-4), 2.42 (s, 3H,  $\text{SCH}_3$ ), 1.61 (d, 3H,  $\text{CH}_3$ ).  $^{13}\text{C}$  NMR (100 MHz,  $\text{CDCl}_3$ )  $\delta$  211.2, 189.5, 163.1, 131.8, 130.9, 130.6, 129.1, 113.9, 83.5, 80.9, 55.5, 51.6, 38.1, 17.5, 16.8. HRMS (ESI):  $m/z$  calcd for  $\text{C}_{17}\text{H}_{18}\text{O}_4\text{S}_2\text{Na}$ : 373.0544; found: 373.0548  $[\text{M}+\text{Na}]^+$ .

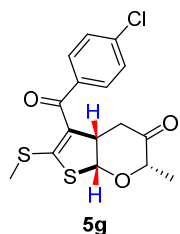

(2*S*,4*aS*,7*aR*)-5-(4-chlorobenzoyl)-2-methyl-6-(methylthio)-4*a*,7*a*-dihydro-2*H*-thieno[2,3-*b*]pyran-3(4*H*)-one (**5g**):

White powder,  $R_f$ =0.3 (PE:EA=6:1), 61.3 mg, 74.7% yield. m.p. 166–168°C.  $^1\text{H}$  NMR (400 MHz,  $\text{CDCl}_3$ )  $\delta$  7.58 (d,  $J$  = 8.2 Hz, 2H, ArH), 7.42 (d,  $J$  = 8.1 Hz, 2H, ArH), 5.57 (d,  $J$  = 7.4 Hz, 1H, H-2), 4.23 (dt,  $J$  = 9.1, 7.6 Hz, 1H, H-3), 4.01 (q,  $J$  = 6.9 Hz, 1H, H-6), 2.68 (dd,  $J$  = 14.6, 9.3 Hz, 1H, H-4), 2.58 (dd,  $J$  = 14.6, 7.2 Hz, 1H, H-4), 2.46 (d,  $J$  = 1.0 Hz, 3H,  $\text{SCH}_3$ ), 1.39 (d,  $J$  = 7.0 Hz, 3H,  $\text{CH}_3$ ).  $^{13}\text{C}$  NMR (100 MHz,  $\text{CDCl}_3$ )  $\delta$  211.0, 189.0, 156.9, 138.3, 137.9, 129.4, 129.0, 128.0, 83.6, 80.9, 51.1, 38.3, 17.7, 16.7. HRMS (ESI):  $m/z$  calcd for  $\text{C}_{16}\text{H}_{15}\text{ClO}_3\text{S}_2\text{Na}$ : 377.0046; found: 377.0049  $[\text{M}+\text{Na}]^+$ .

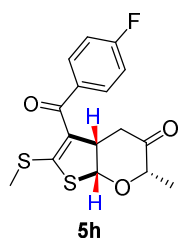

(2*S*,4*aS*,7*aR*)-5-(4-fluorobenzoyl)-2-methyl-6-(methylthio)-4*a*,7*a*-dihydro-2*H*-thieno[2,3-*b*]pyran-3(4*H*)-one (**5h**):

White powder,  $R_f$ =0.3 (PE:EA=6:1), 62.5 mg, 78.1% yield. m.p. 126–128°C.  $^1\text{H}$  NMR (400 MHz,  $\text{CDCl}_3$ )  $\delta$  7.72 – 7.62 (m, 2H, ArH), 7.17 – 7.07 (m, 2H, ArH), 5.57 (d,  $J$  = 7.2 Hz, 1H, H-2), 4.24 (dt,  $J$  = 9.3, 7.3 Hz, 1H, H-3), 4.01 (q,  $J$  = 7.0 Hz, 1H, H-6), 2.69 (dd,  $J$  = 14.6, 9.3 Hz, 1H, H-4), 2.59 (dd,  $J$  = 14.6, 7.2 Hz, 1H, H-4), 2.45 (s, 3H,  $\text{SCH}_3$ ), 1.39 (d,  $J$  = 7.0 Hz, 3H,  $\text{CH}_3$ ).  $^{13}\text{C}$  NMR (100 MHz,  $\text{CDCl}_3$ )  $\delta$  211.0, 188.9, 165.1 (d,  $J$  = 253.5 Hz), 155.7, 135.7, 130.6, 130.5, 128.2, 115.9, 115.7, 83.5, 80.9, 51.2, 38.2, 17.6. HRMS (ESI):  $m/z$  calcd for  $\text{C}_{16}\text{H}_{15}\text{FO}_3\text{S}_2\text{Na}$ : 361.0344; found: 361.0347  $[\text{M}+\text{Na}]^+$ .

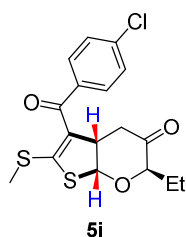

(2*R*,4*aS*,7*aR*)-5-(4-chlorobenzoyl)-2-ethyl-6-(methylthio)-4*a*,7*a*-dihydro-2*H*-thieno[2,3-*b*]pyran-3(4*H*)-one (**5i**):

White powder,  $R_f$ =0.4 (PE:EA=6:1), 57.0 mg, 71.6% yield. m.p. 119–121°C.  $^1\text{H}$  NMR (400 MHz,  $\text{CDCl}_3$ )  $\delta$  7.45 (d,  $J$  = 8.5 Hz, 2H, ArH), 7.39 (d,  $J$  = 8.5 Hz, 2H, ArH), 6.31 (dd,  $J$  = 8.9, 0.8 Hz, 1H, H-2), 4.56 (ddd,  $J$  = 8.4, 5.3, 2.6 Hz, 1H, H-3), 4.04 (dd,  $J$  = 7.5, 3.9 Hz, 1H, H-6), 2.83 (dd,  $J$  = 15.2, 5.3 Hz, 1H, H-4), 2.58 (dd,  $J$  = 15.3, 2.7 Hz, 1H, H-4), 2.41 (s, 3H,  $\text{SCH}_3$ ), 1.92 (dq,  $J$  = 15.0, 7.5, 3.9 Hz, 1H), 1.73 (dq,  $J$  = 14.6, 7.4 Hz, 1H), 0.97 (t,  $J$  = 7.4 Hz, 3H,  $\text{CH}_3$ ).  $^{13}\text{C}$  NMR (100 MHz,  $\text{CDCl}_3$ )  $\delta$  210.8, 188.8, 157.7, 138.4, 137.8, 129.6, 129.0, 127.7, 84.7, 78.7, 49.8, 37.4, 23.4, 17.8, 9.4. HRMS (ESI):  $m/z$  calcd for  $\text{C}_{17}\text{H}_{17}\text{ClO}_3\text{S}_2\text{Na}$ : 391.0205; found: 391.0209  $[\text{M}+\text{Na}]^+$ .

## NMR spectra

### $^1\text{H}$ spectra of **2a**.

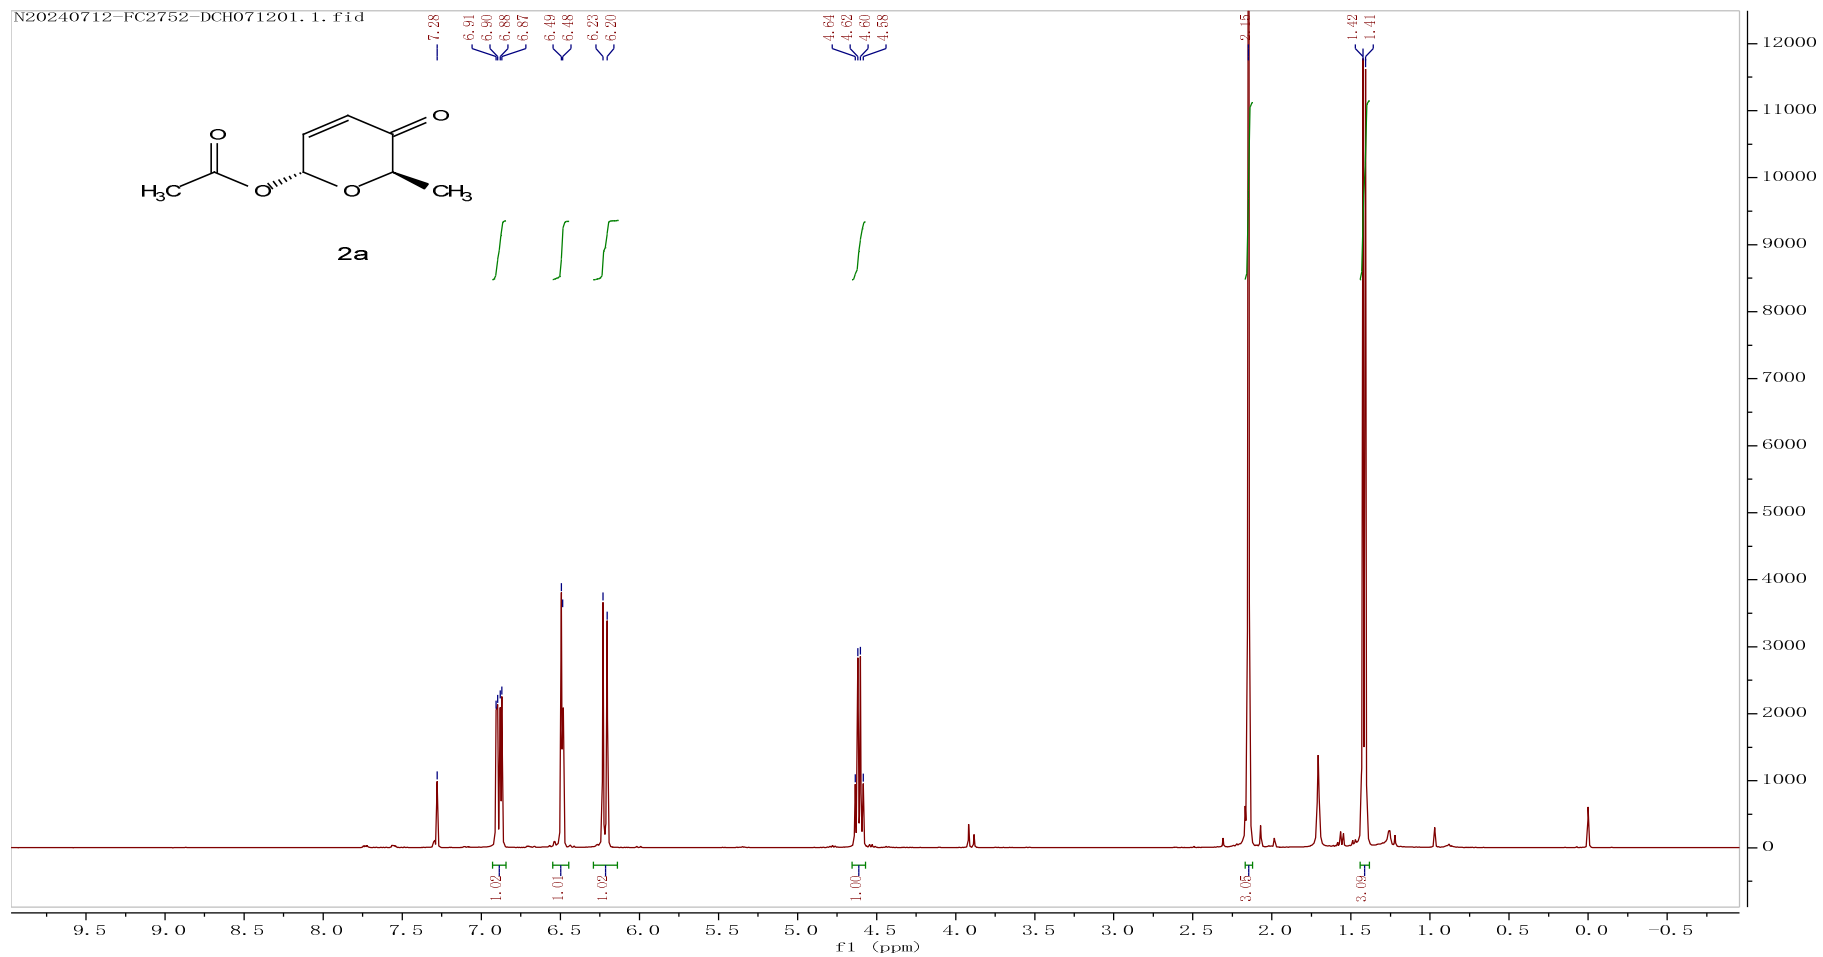

<sup>1</sup>H spectra of **2b**.

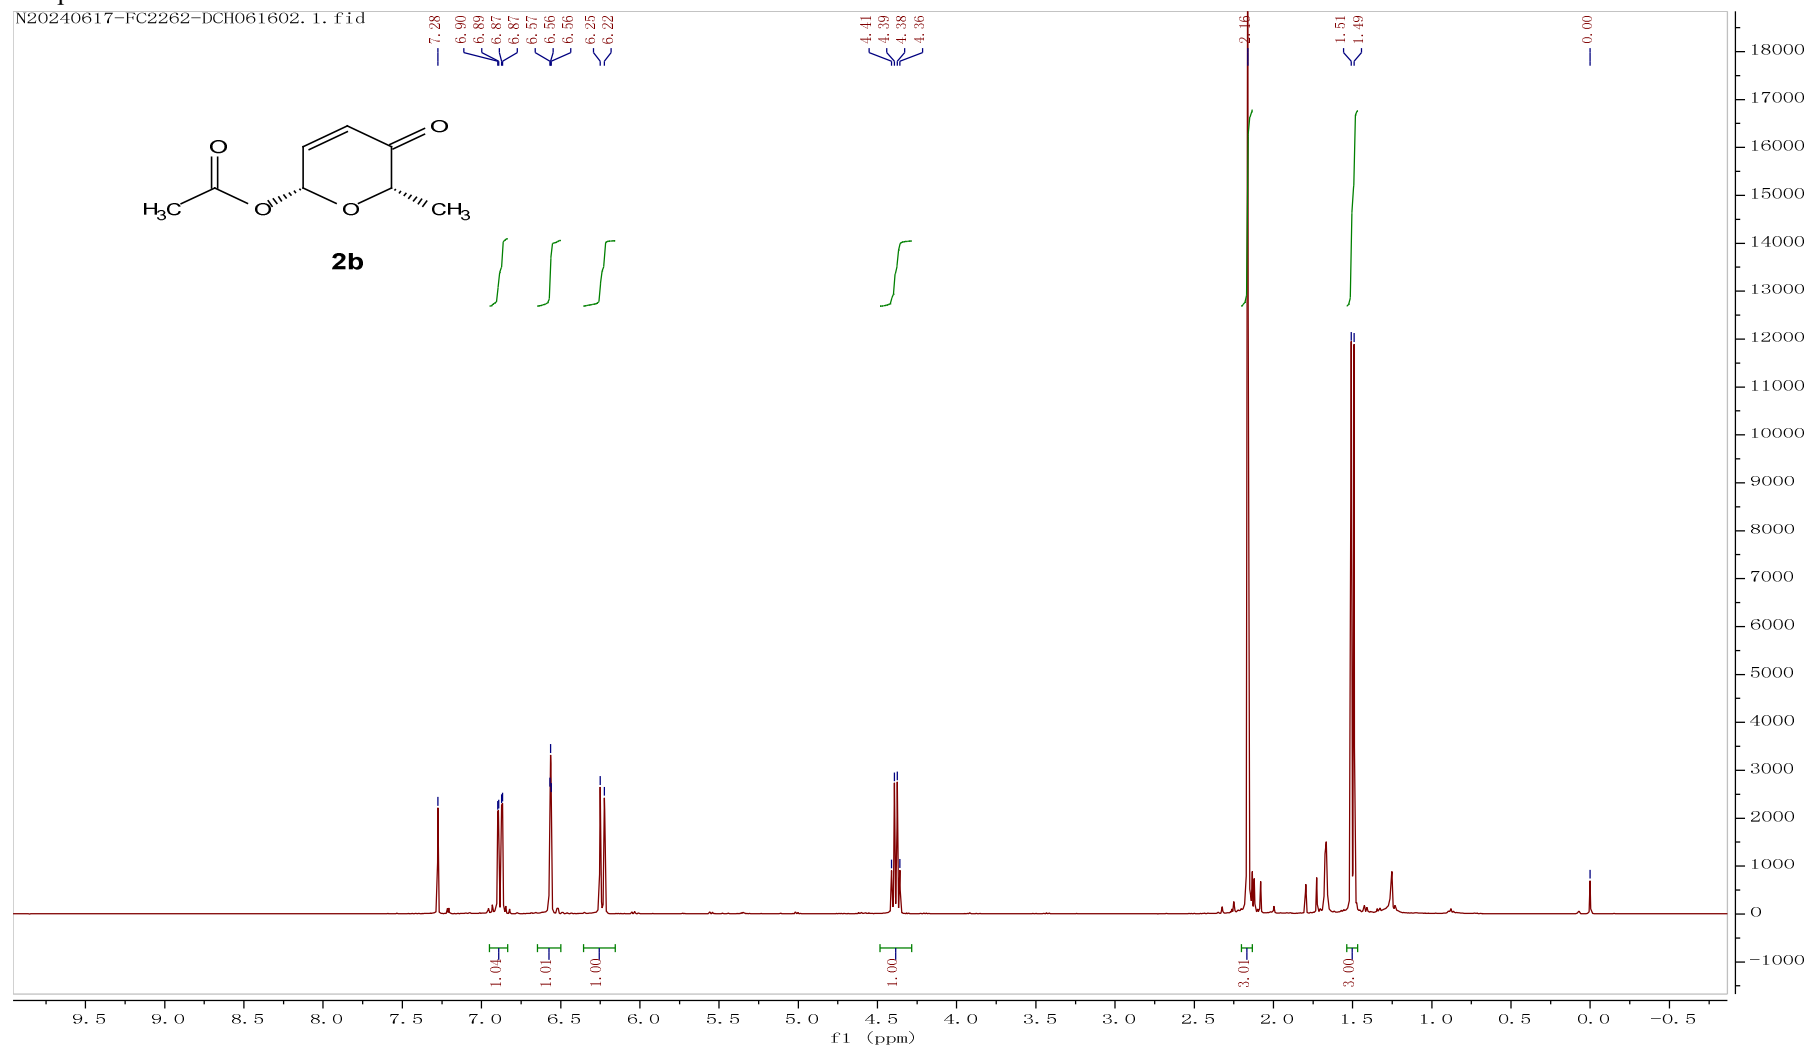

<sup>1</sup>H spectra of **2c**.

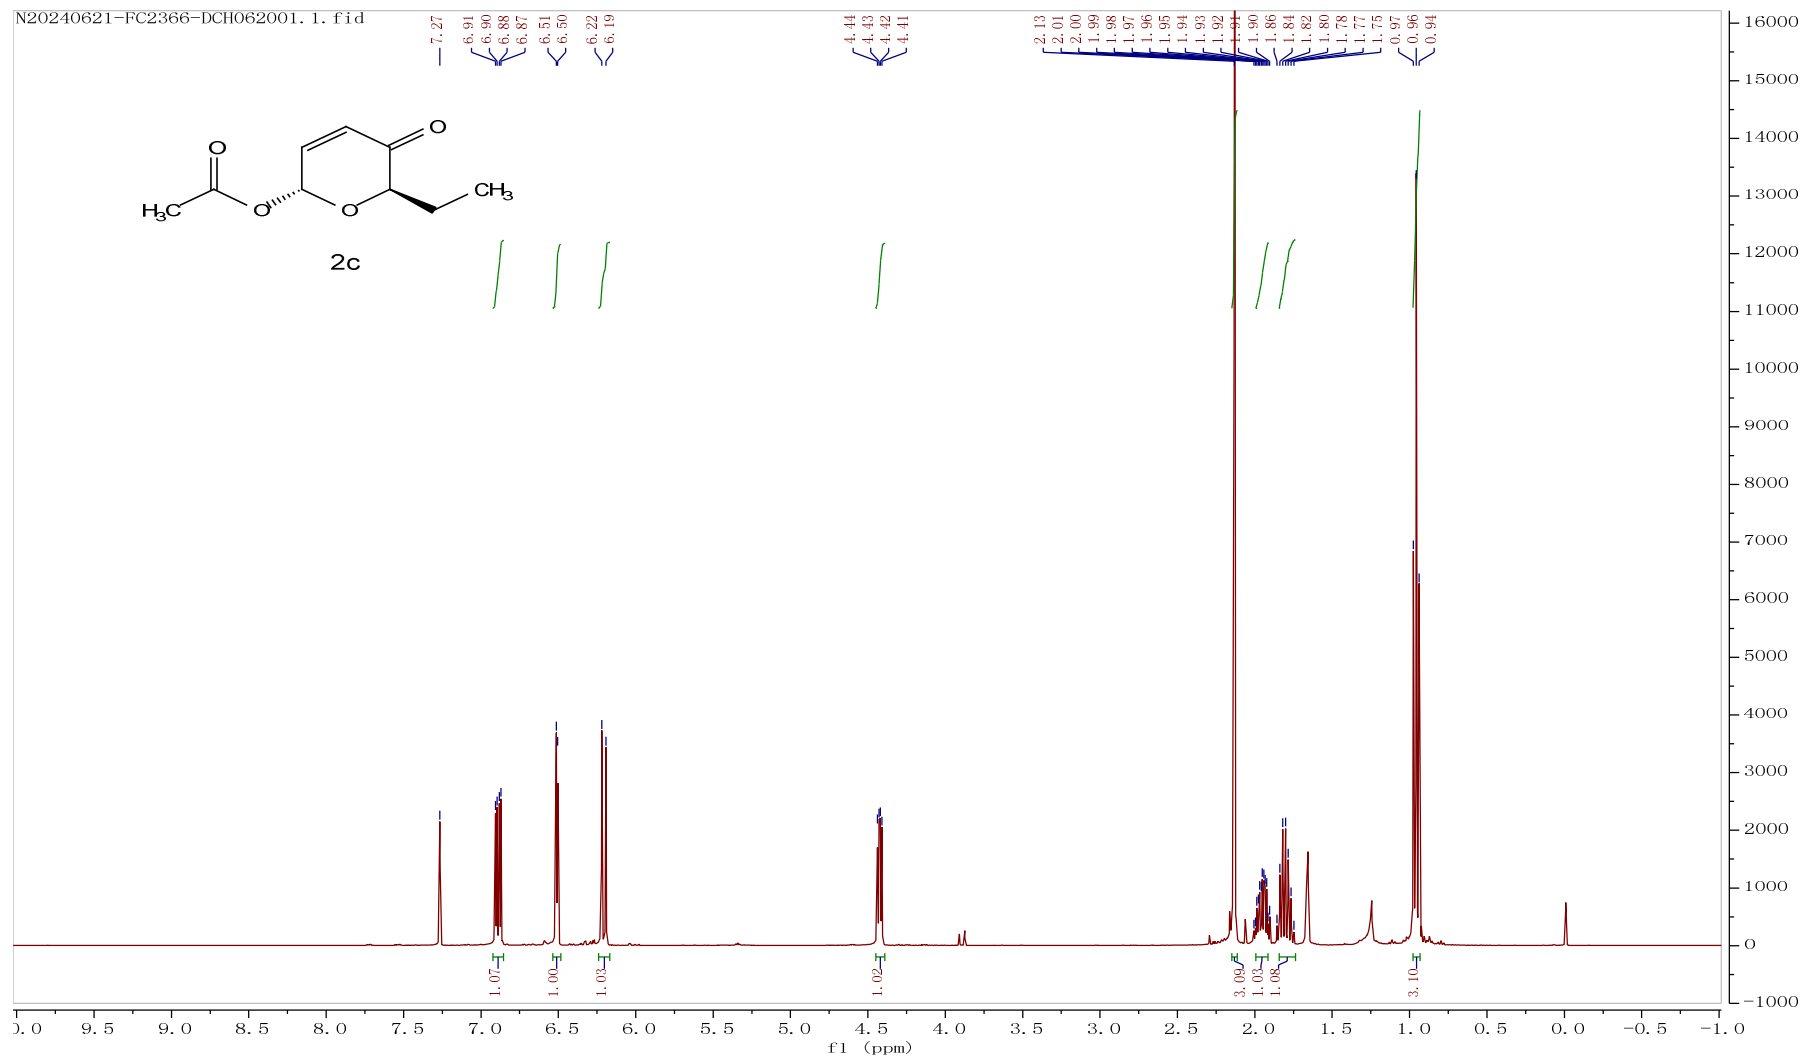

<sup>13</sup>C spectra of **2c**.

N20240920-FC3471-NX2.1.fid

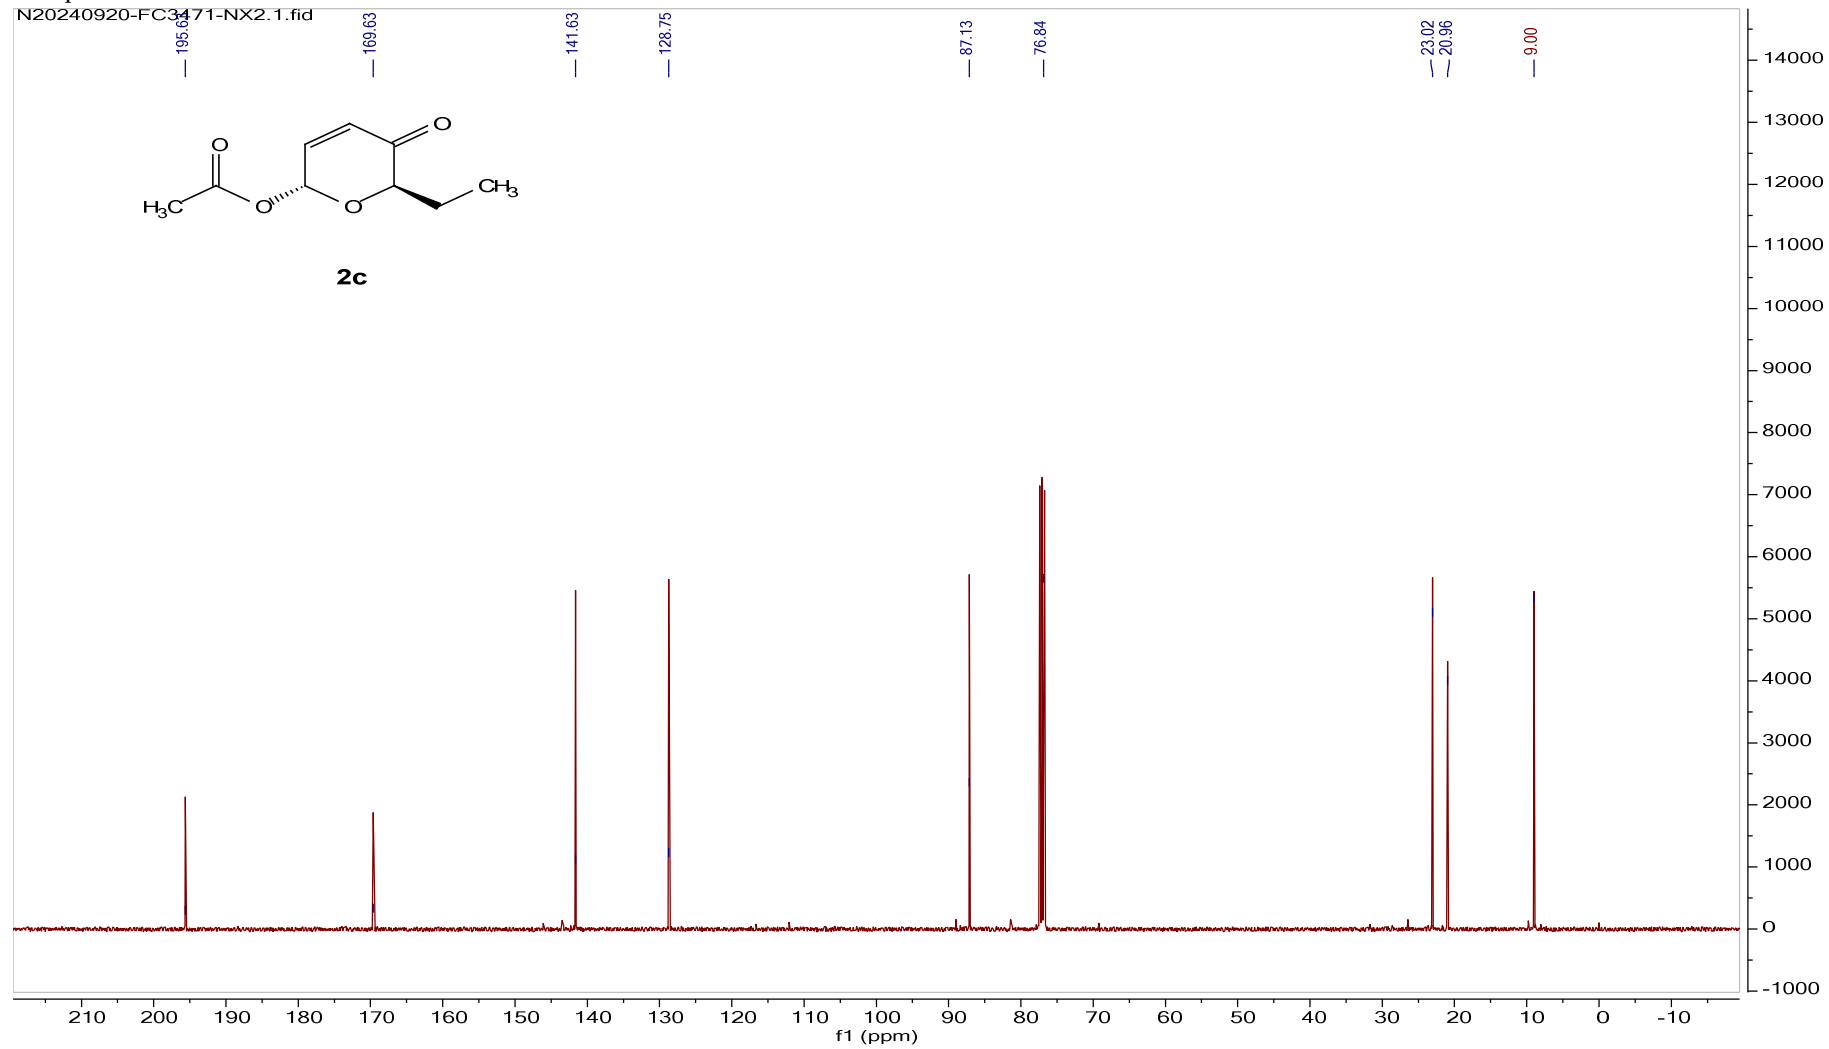



NOESY spectra of **2c**.

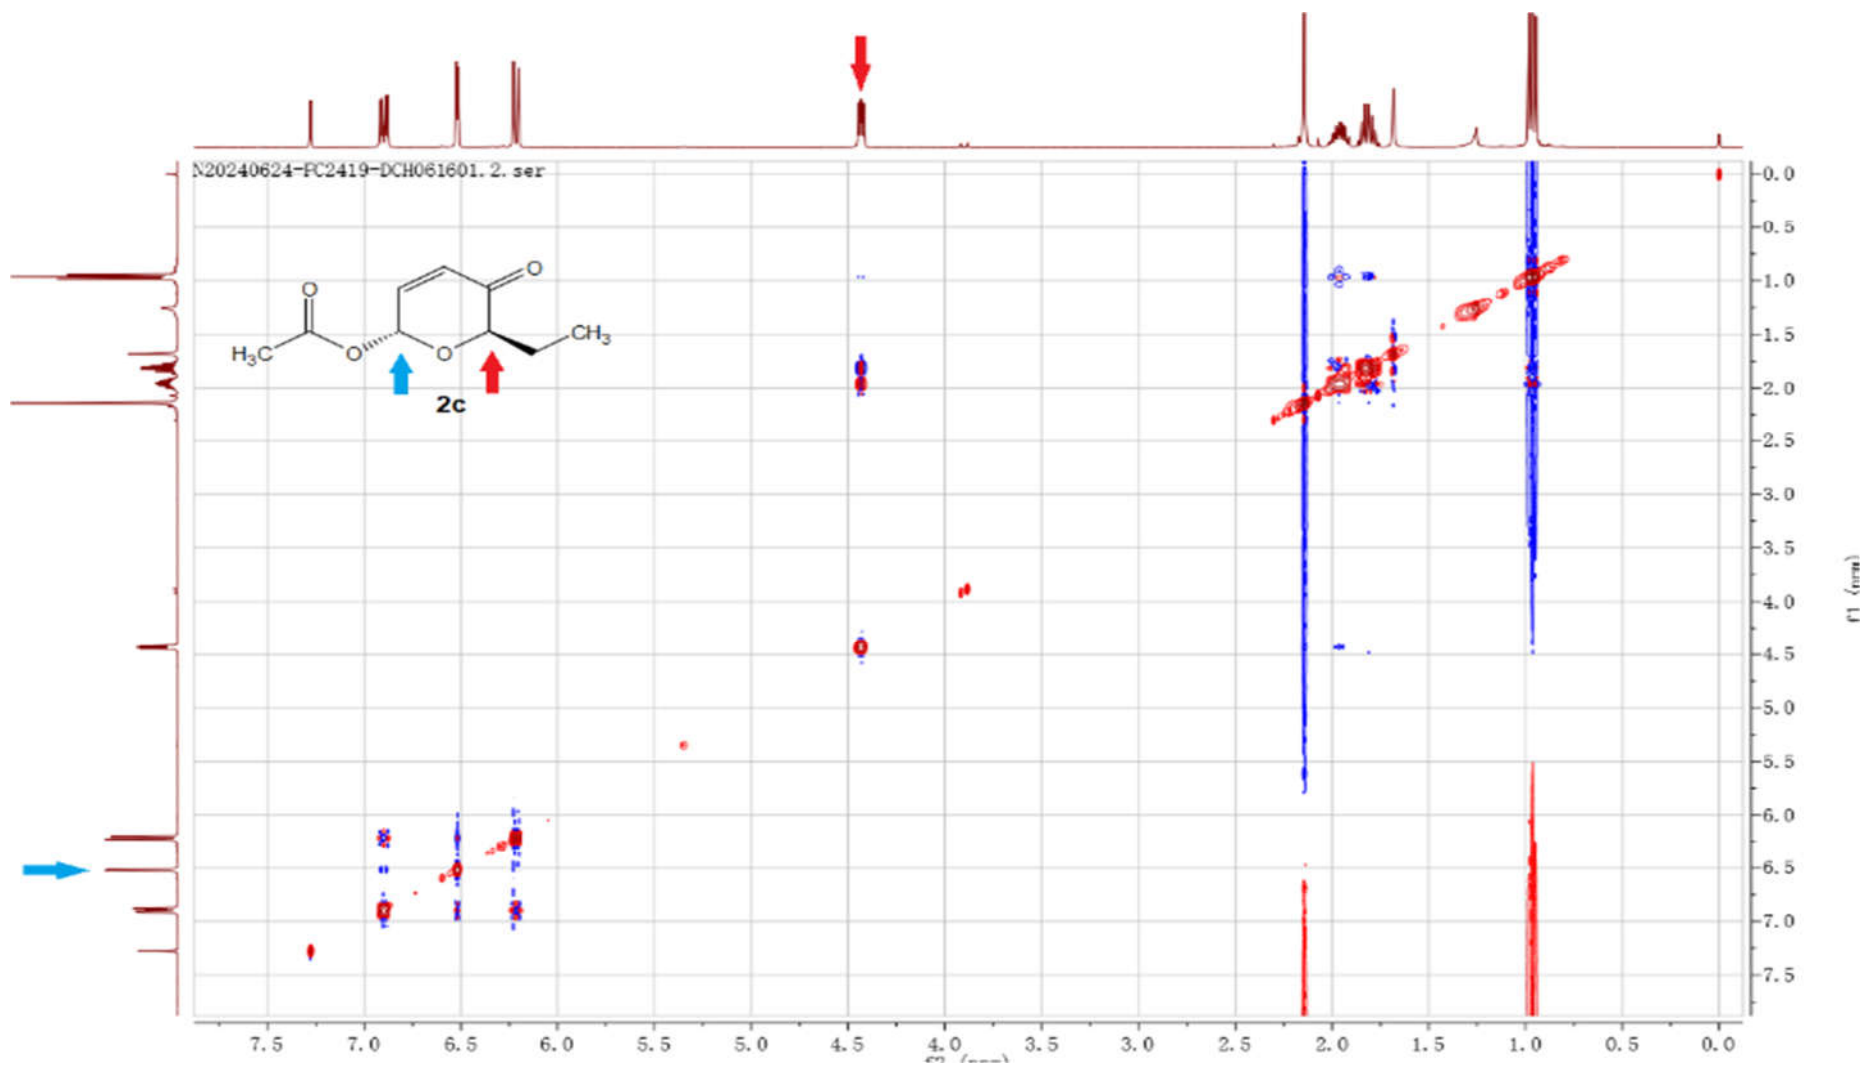

<sup>1</sup>H spectra of **2d**.

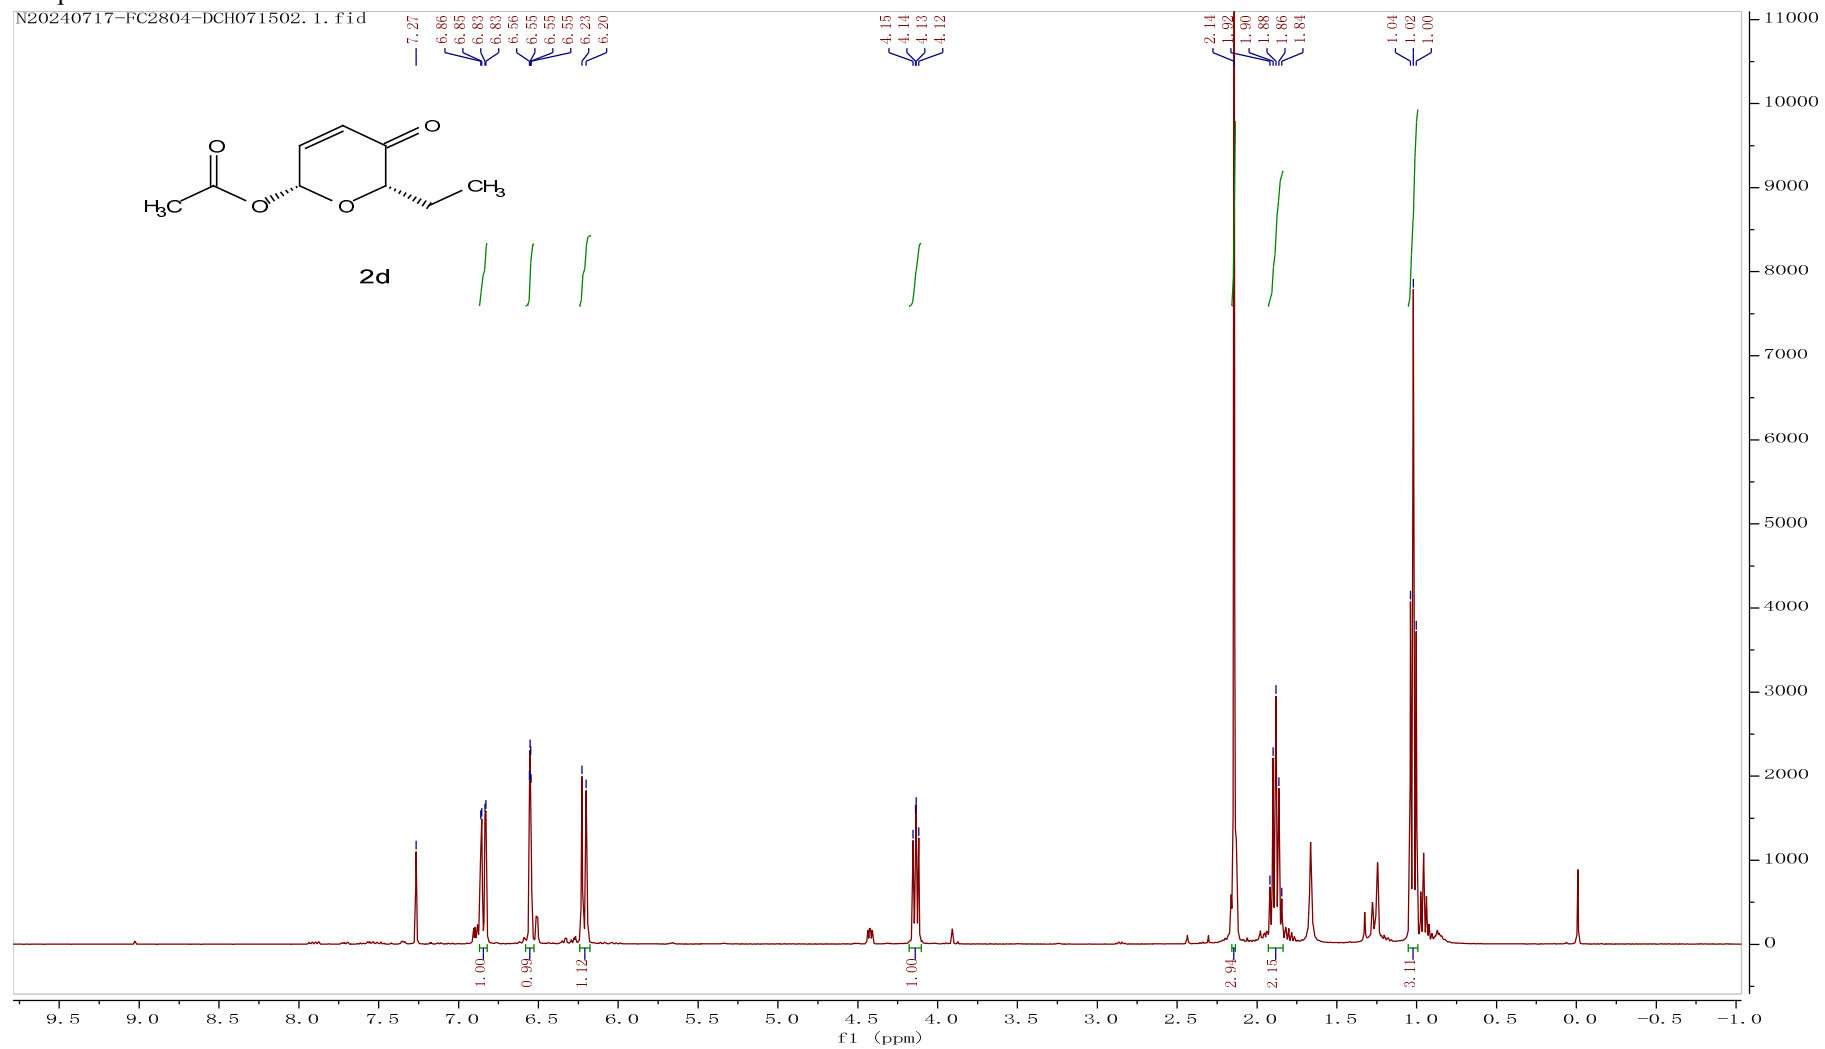

<sup>13</sup>C spectra of **2d**.

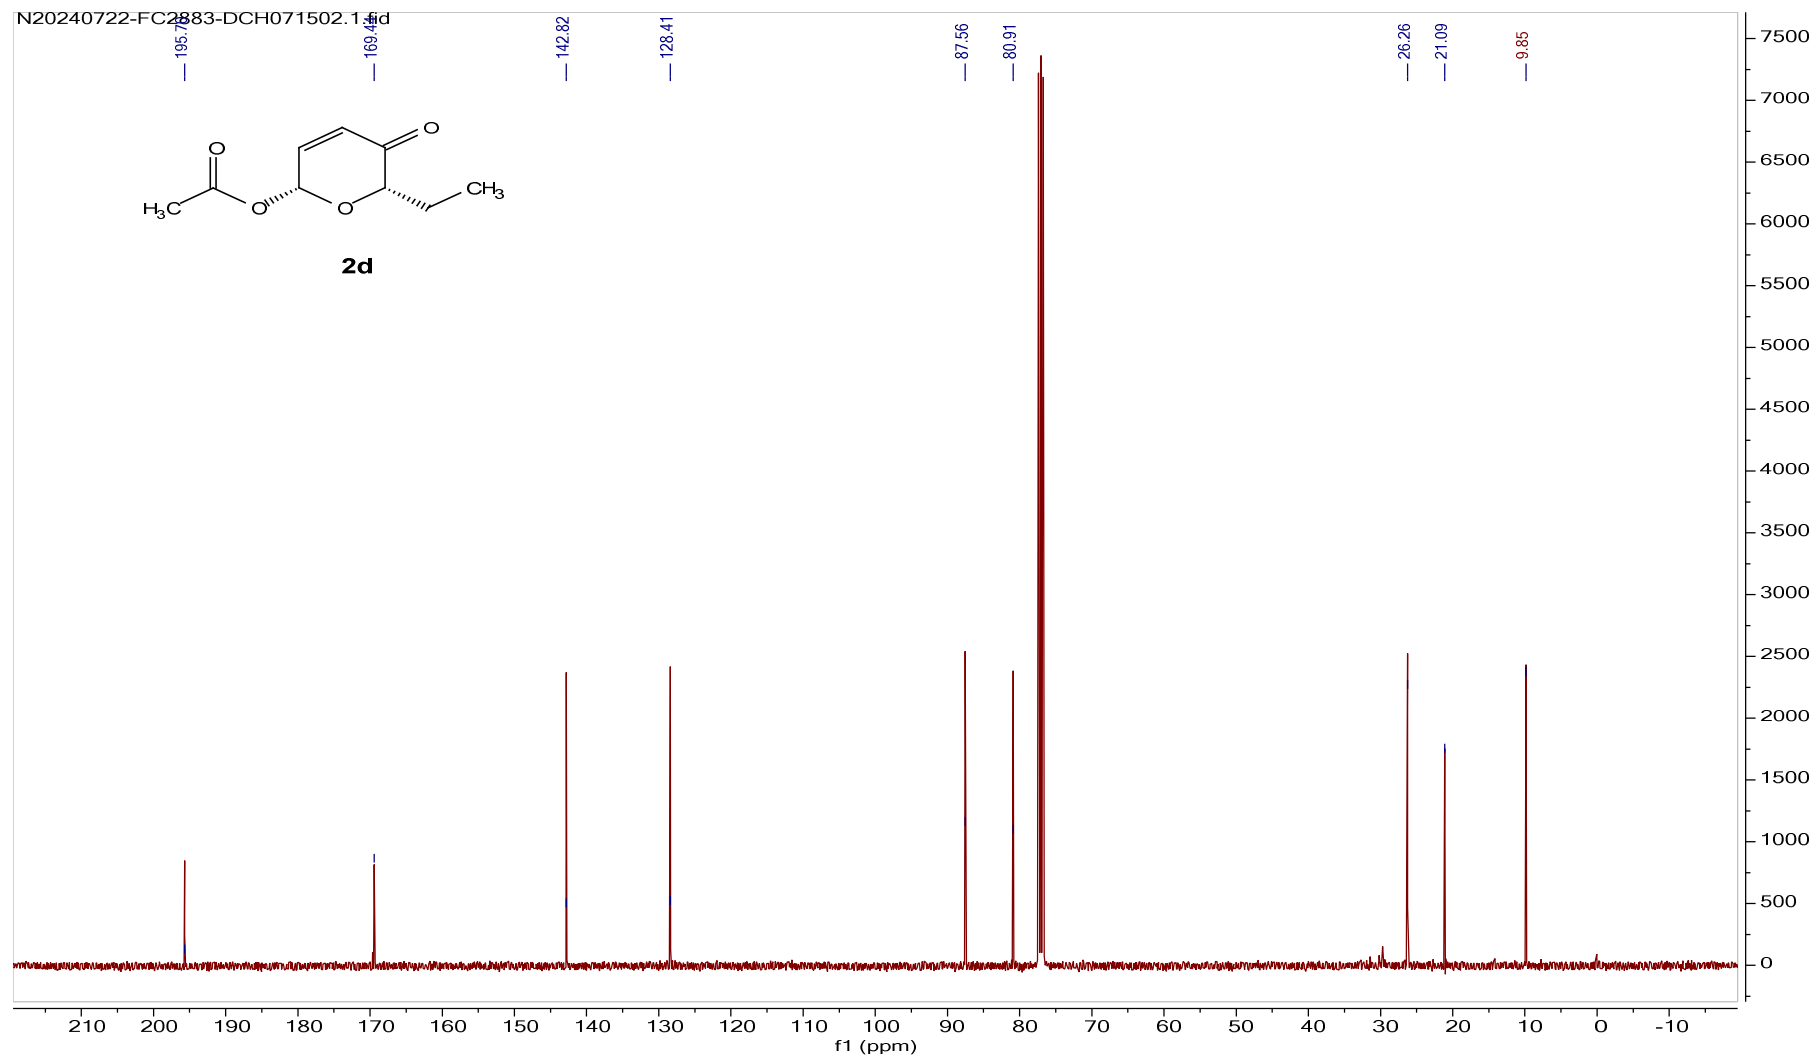

NOESY spectra of **2d**.

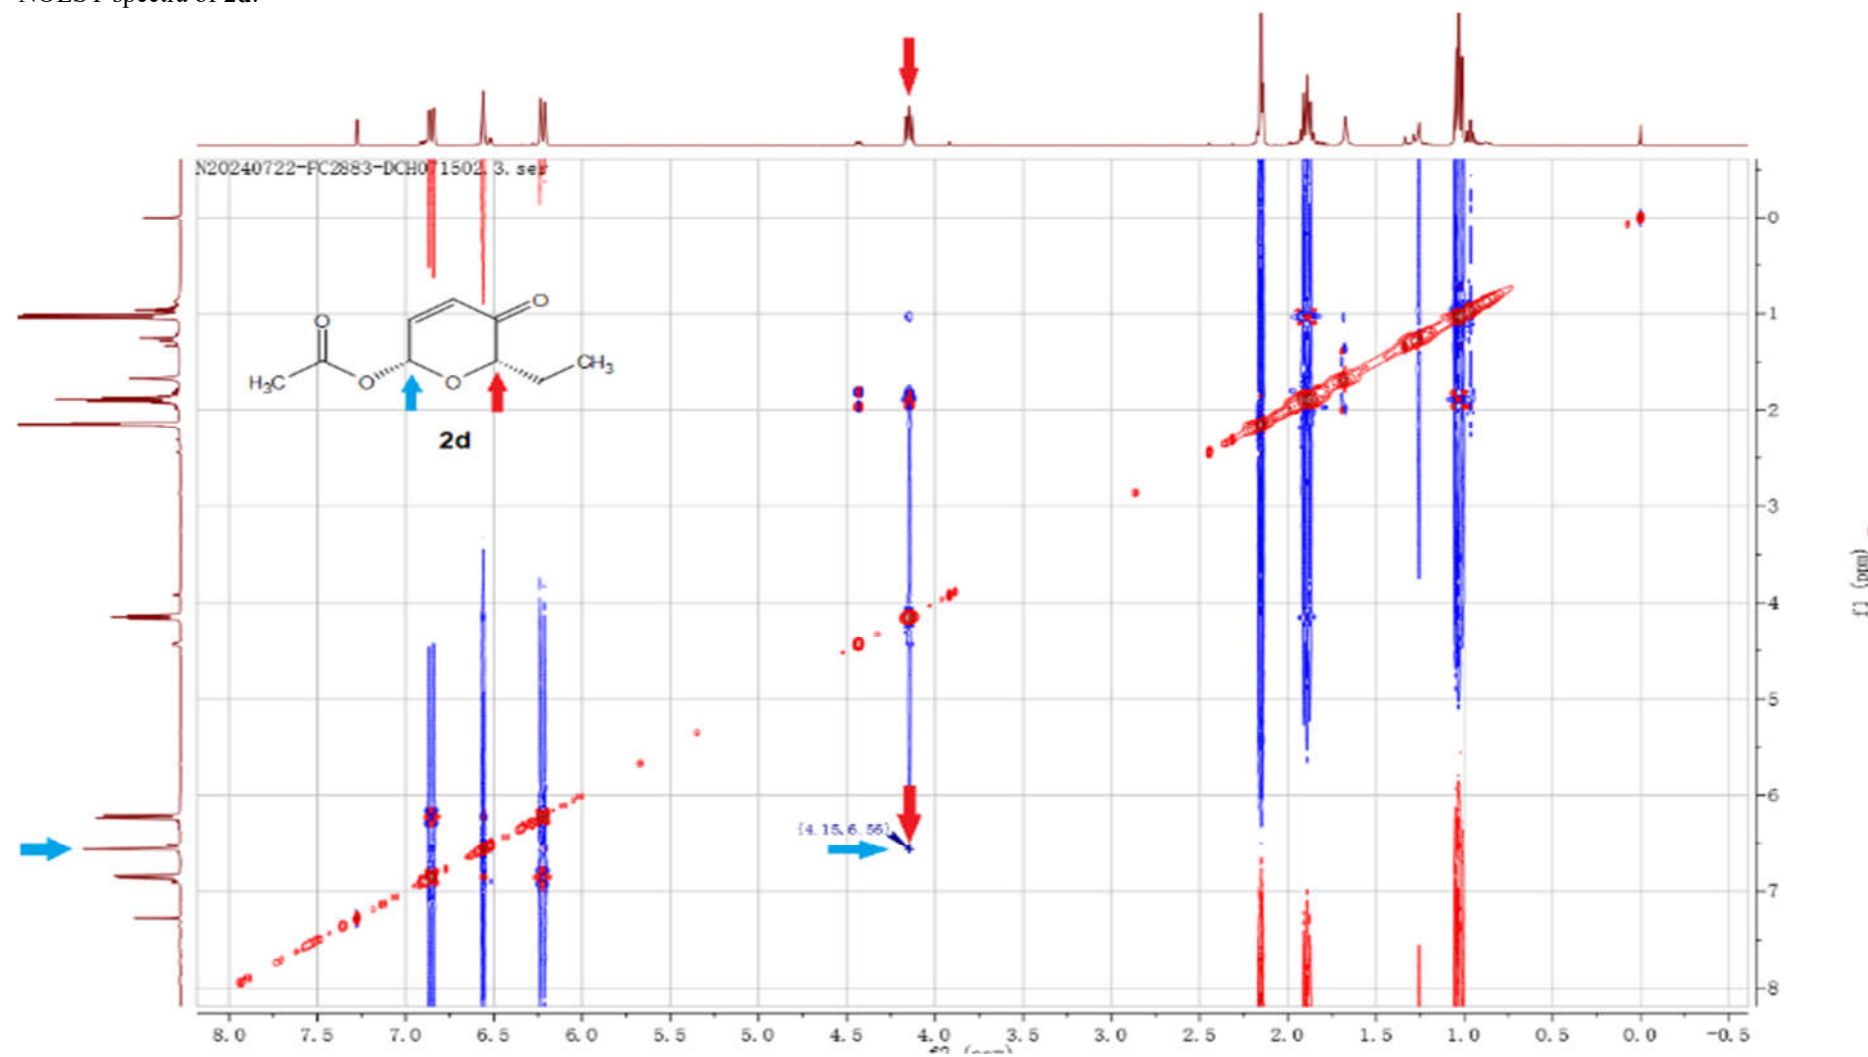

<sup>1</sup>H spectra of **2e**.

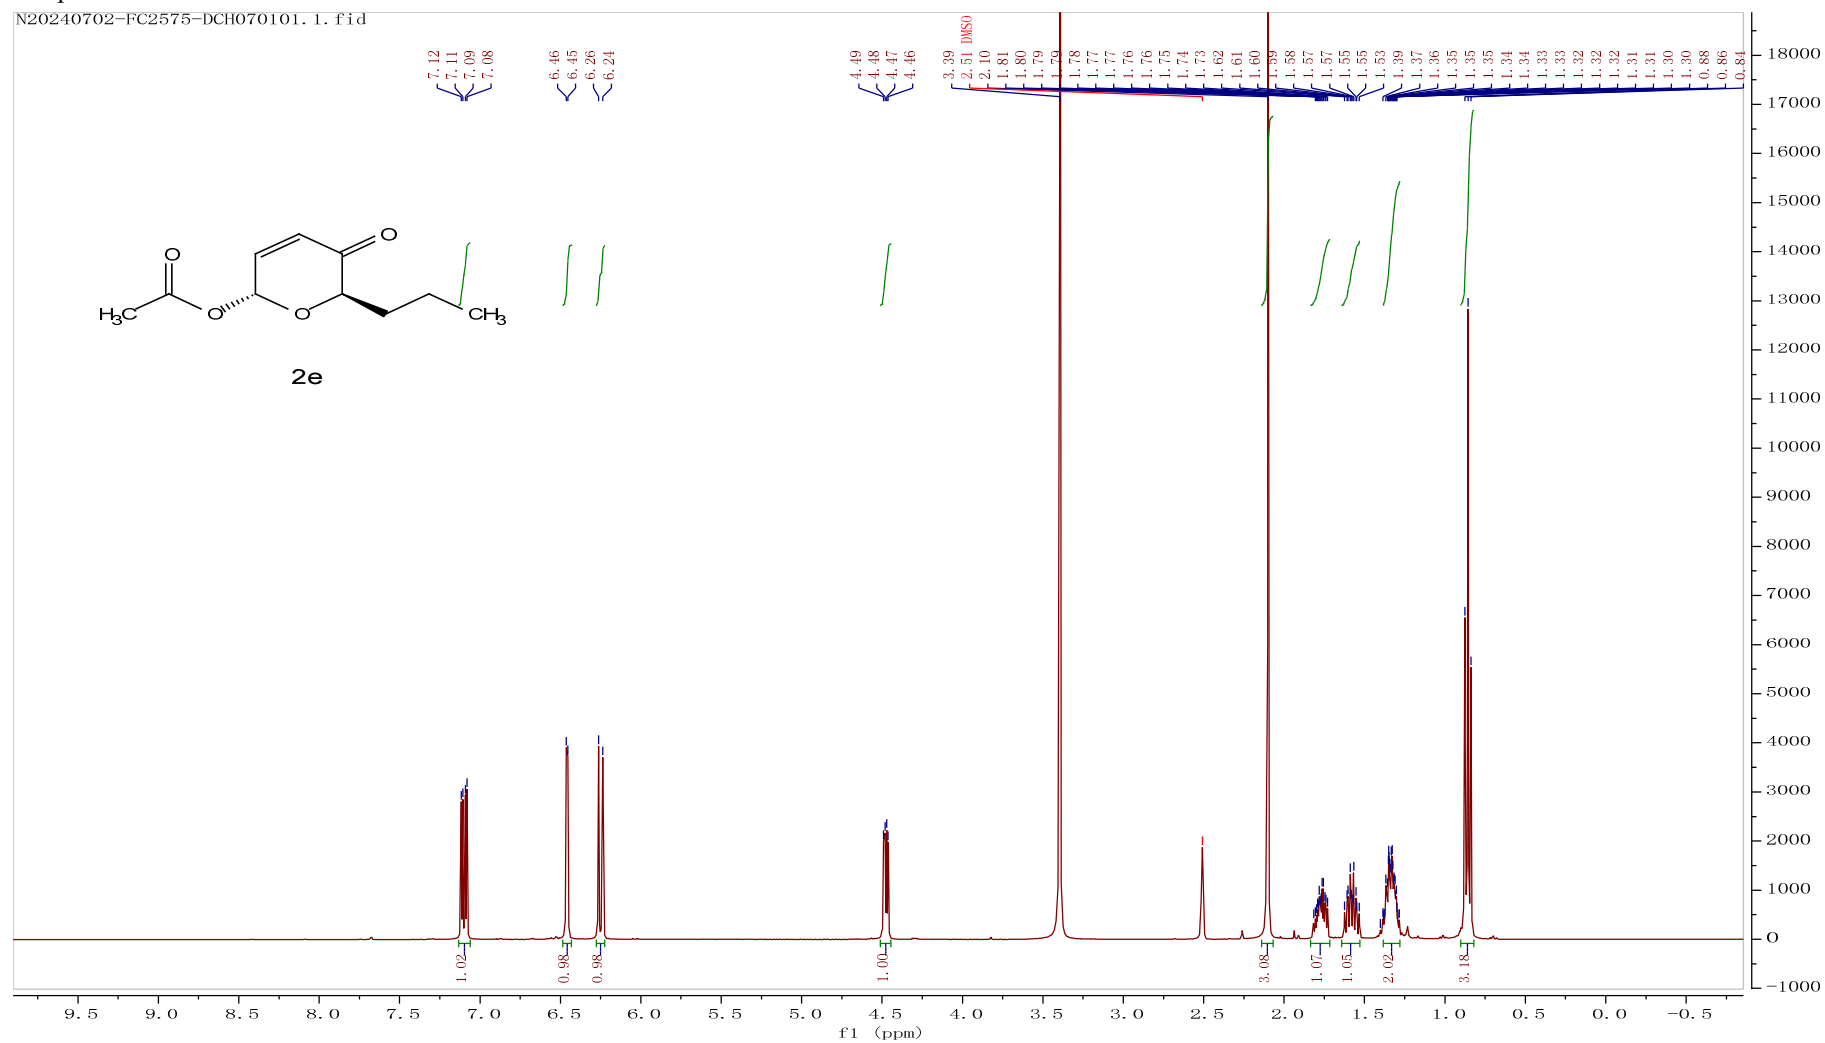

<sup>13</sup>C spectra of **2e**.

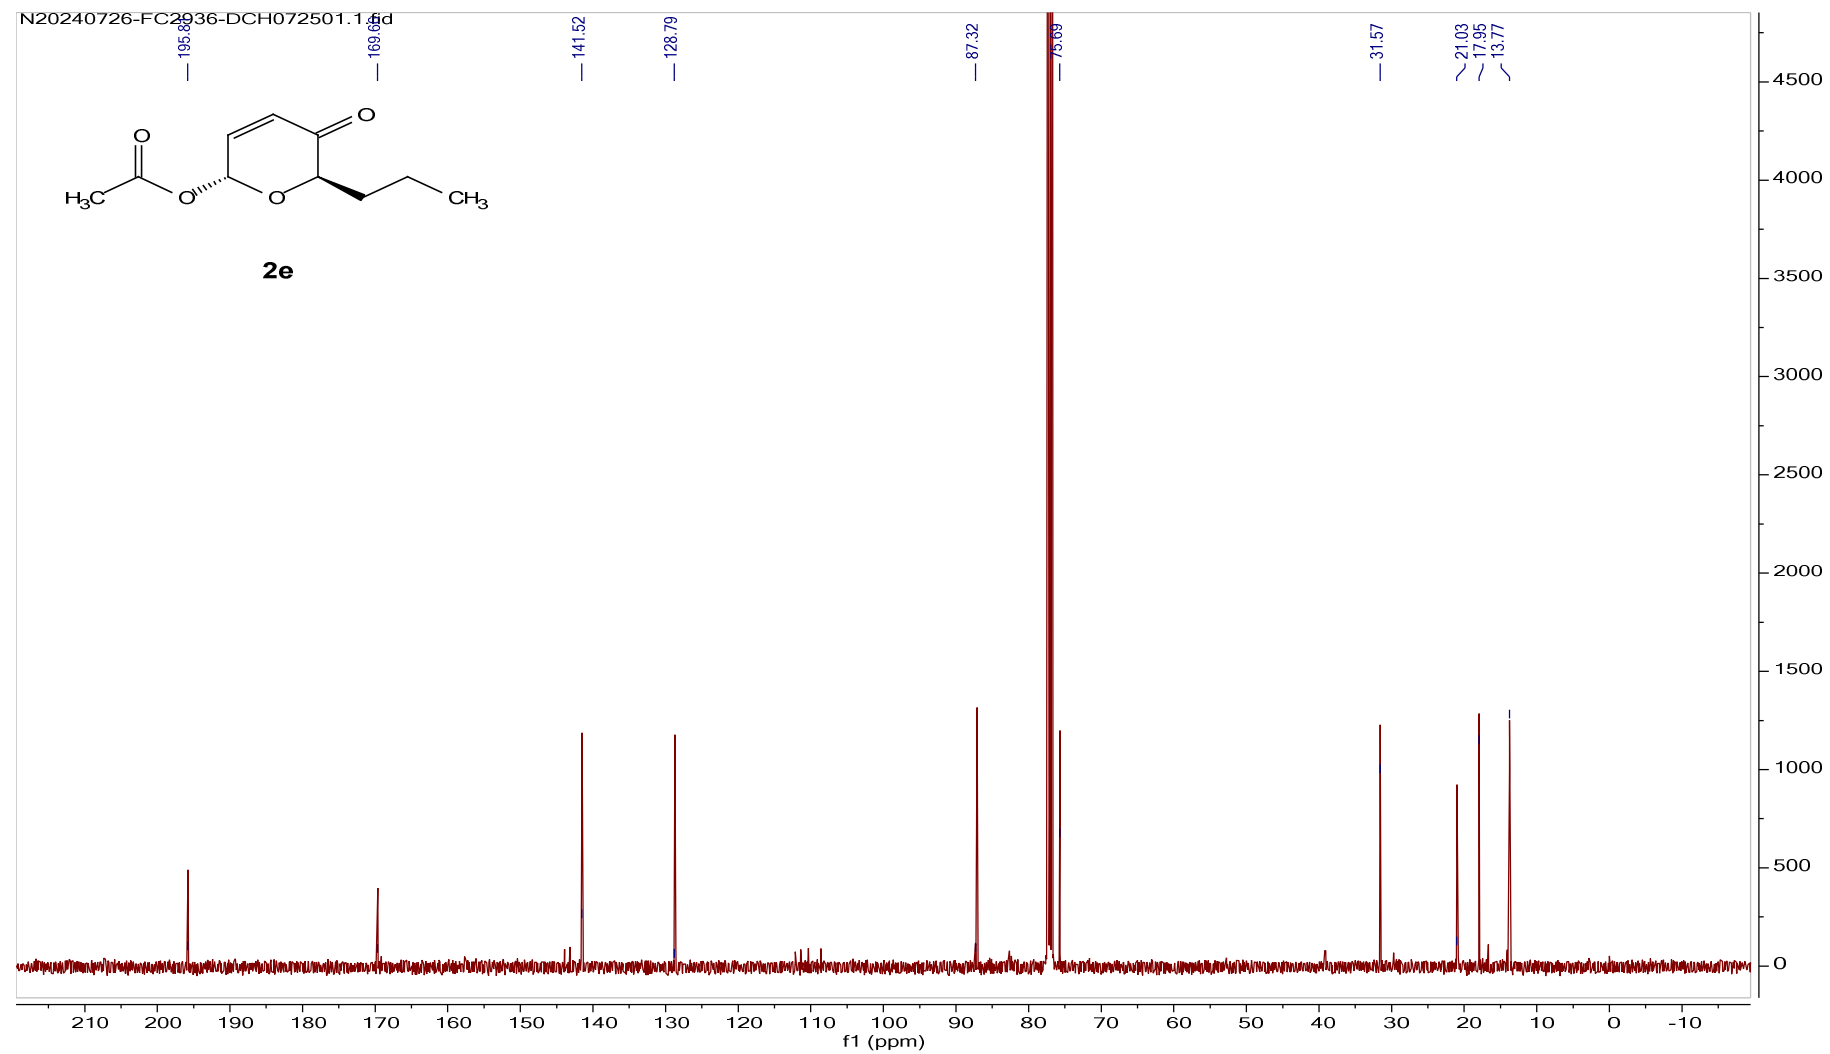

NOESY spectra of **2e**.

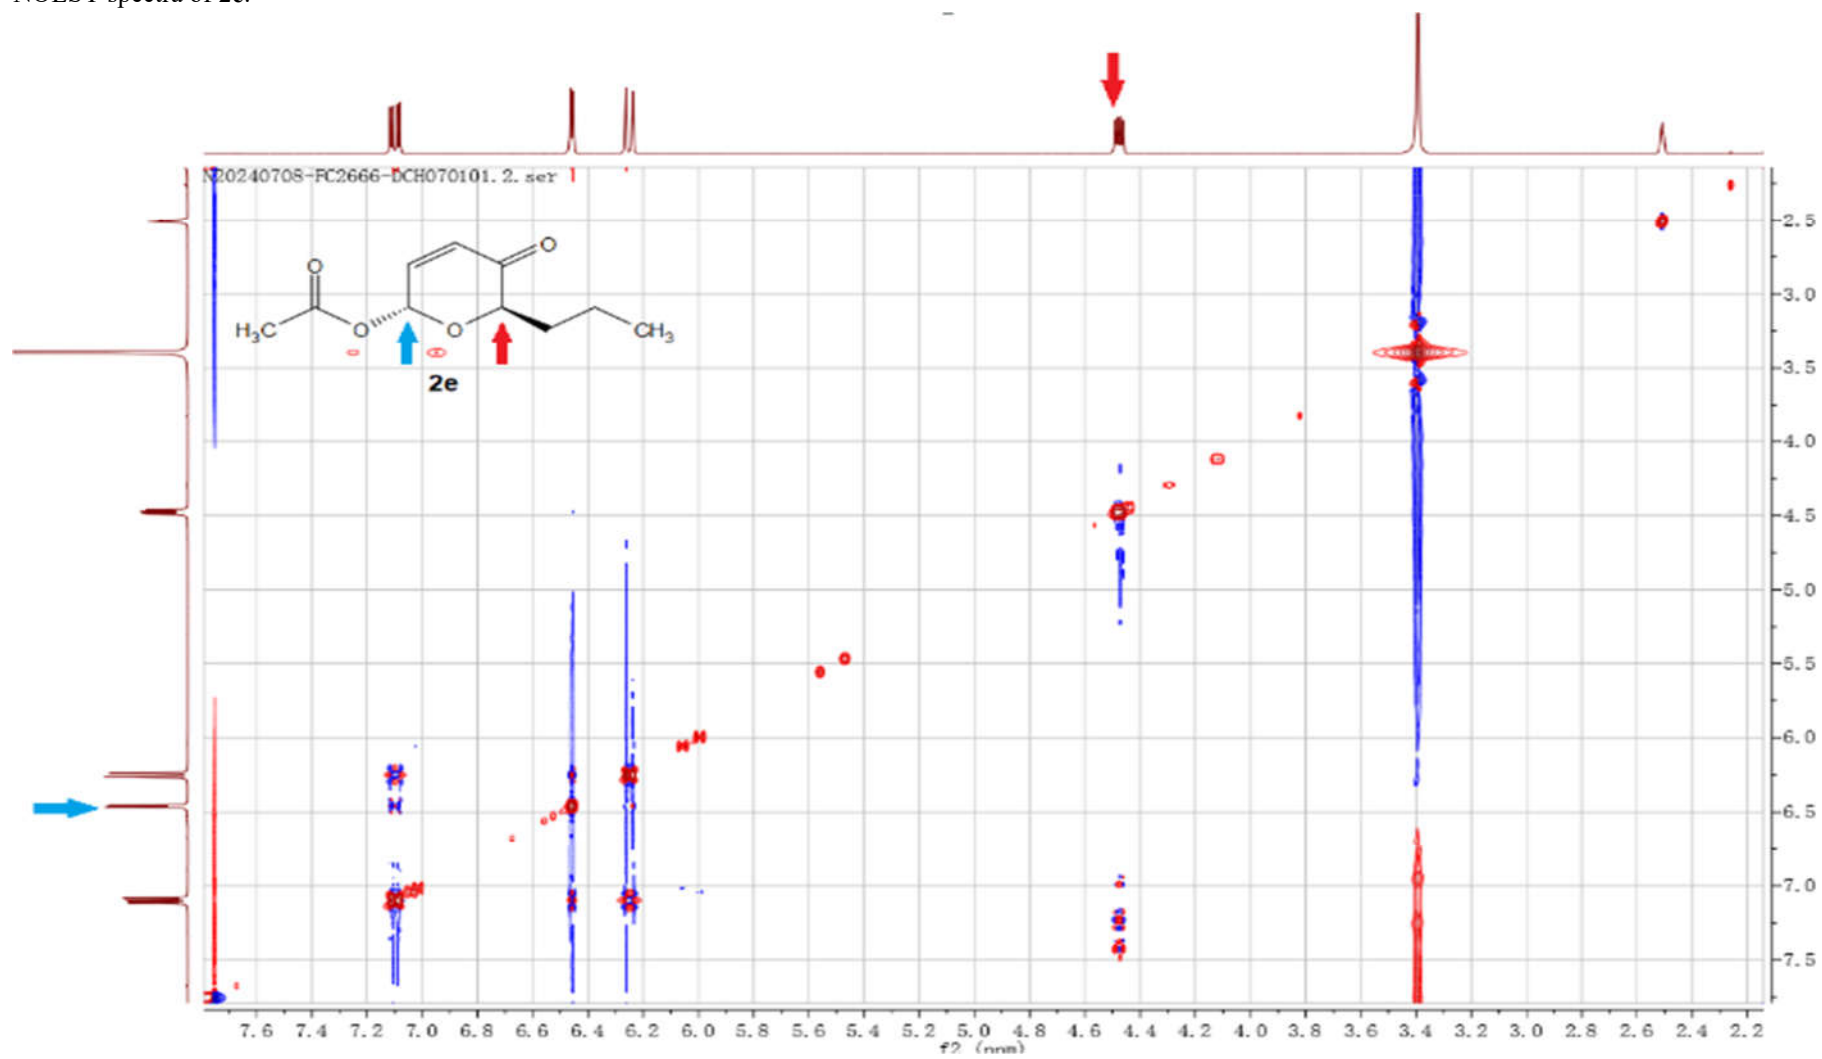

<sup>1</sup>H spectra of **2f**.

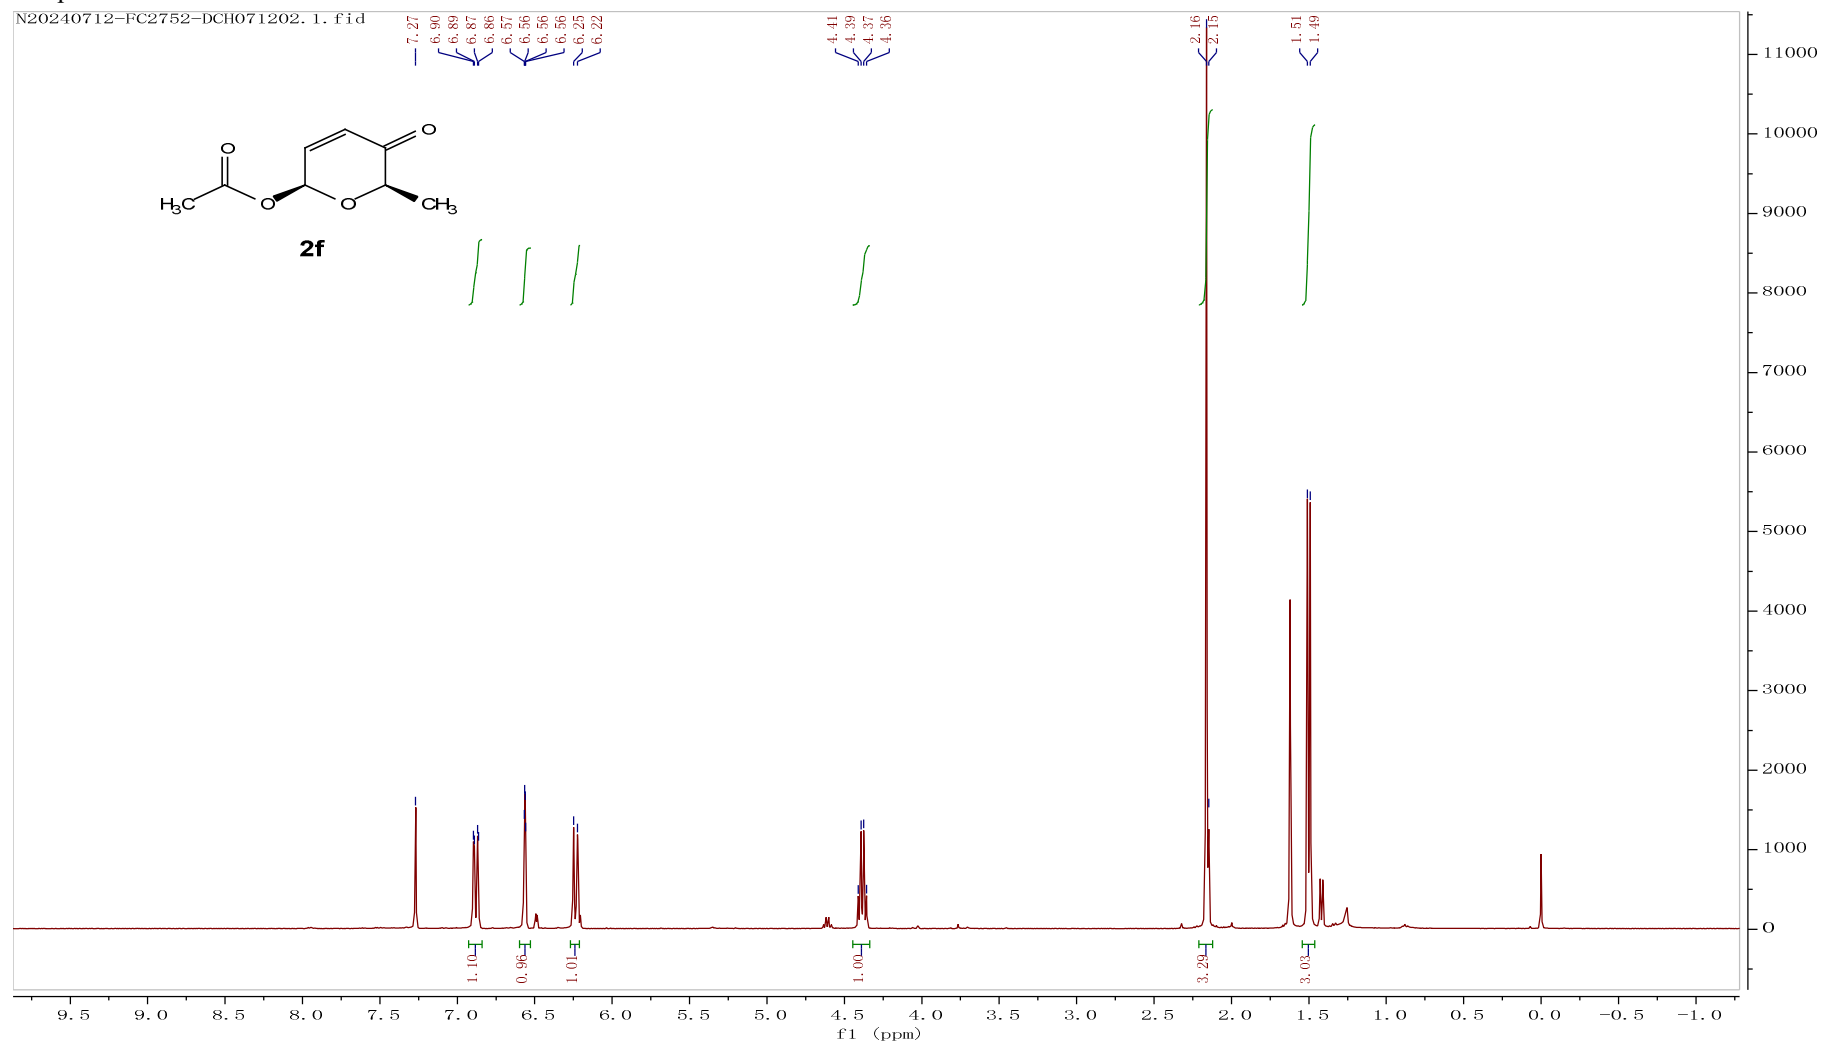



<sup>1</sup>H spectra of **2g**.

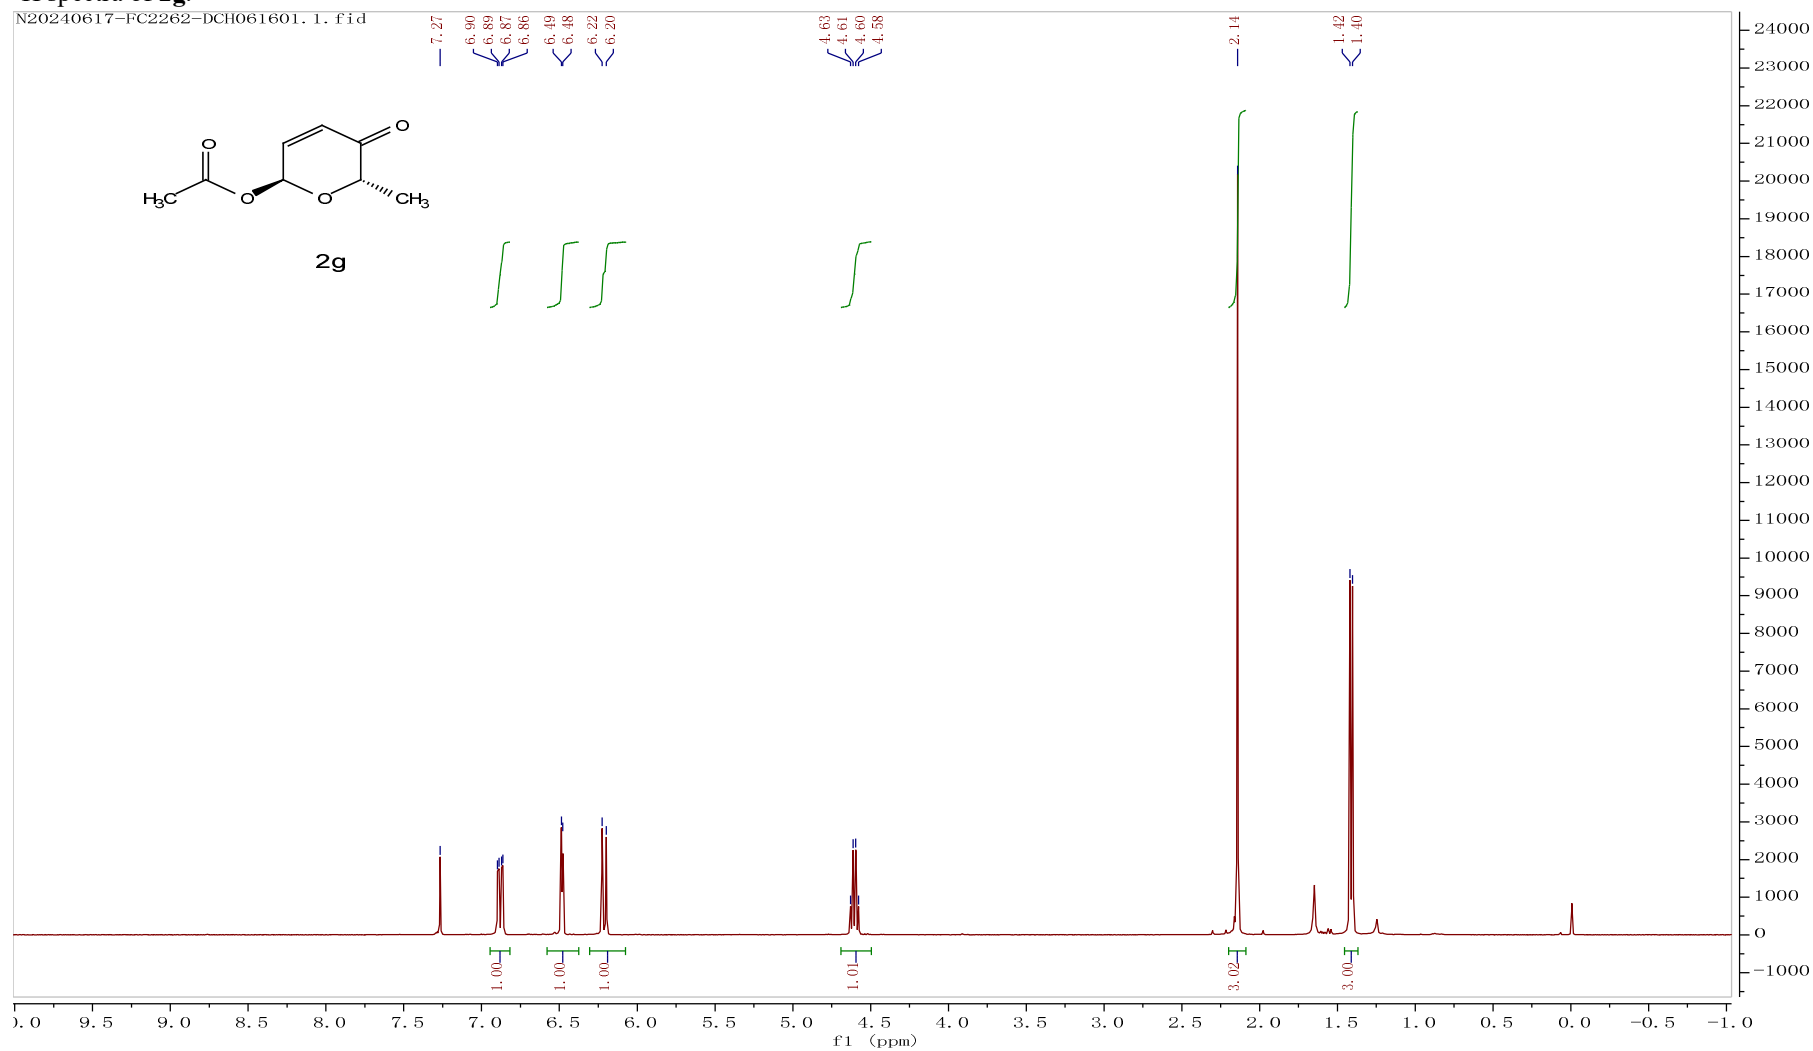

<sup>1</sup>H spectra of 2h.

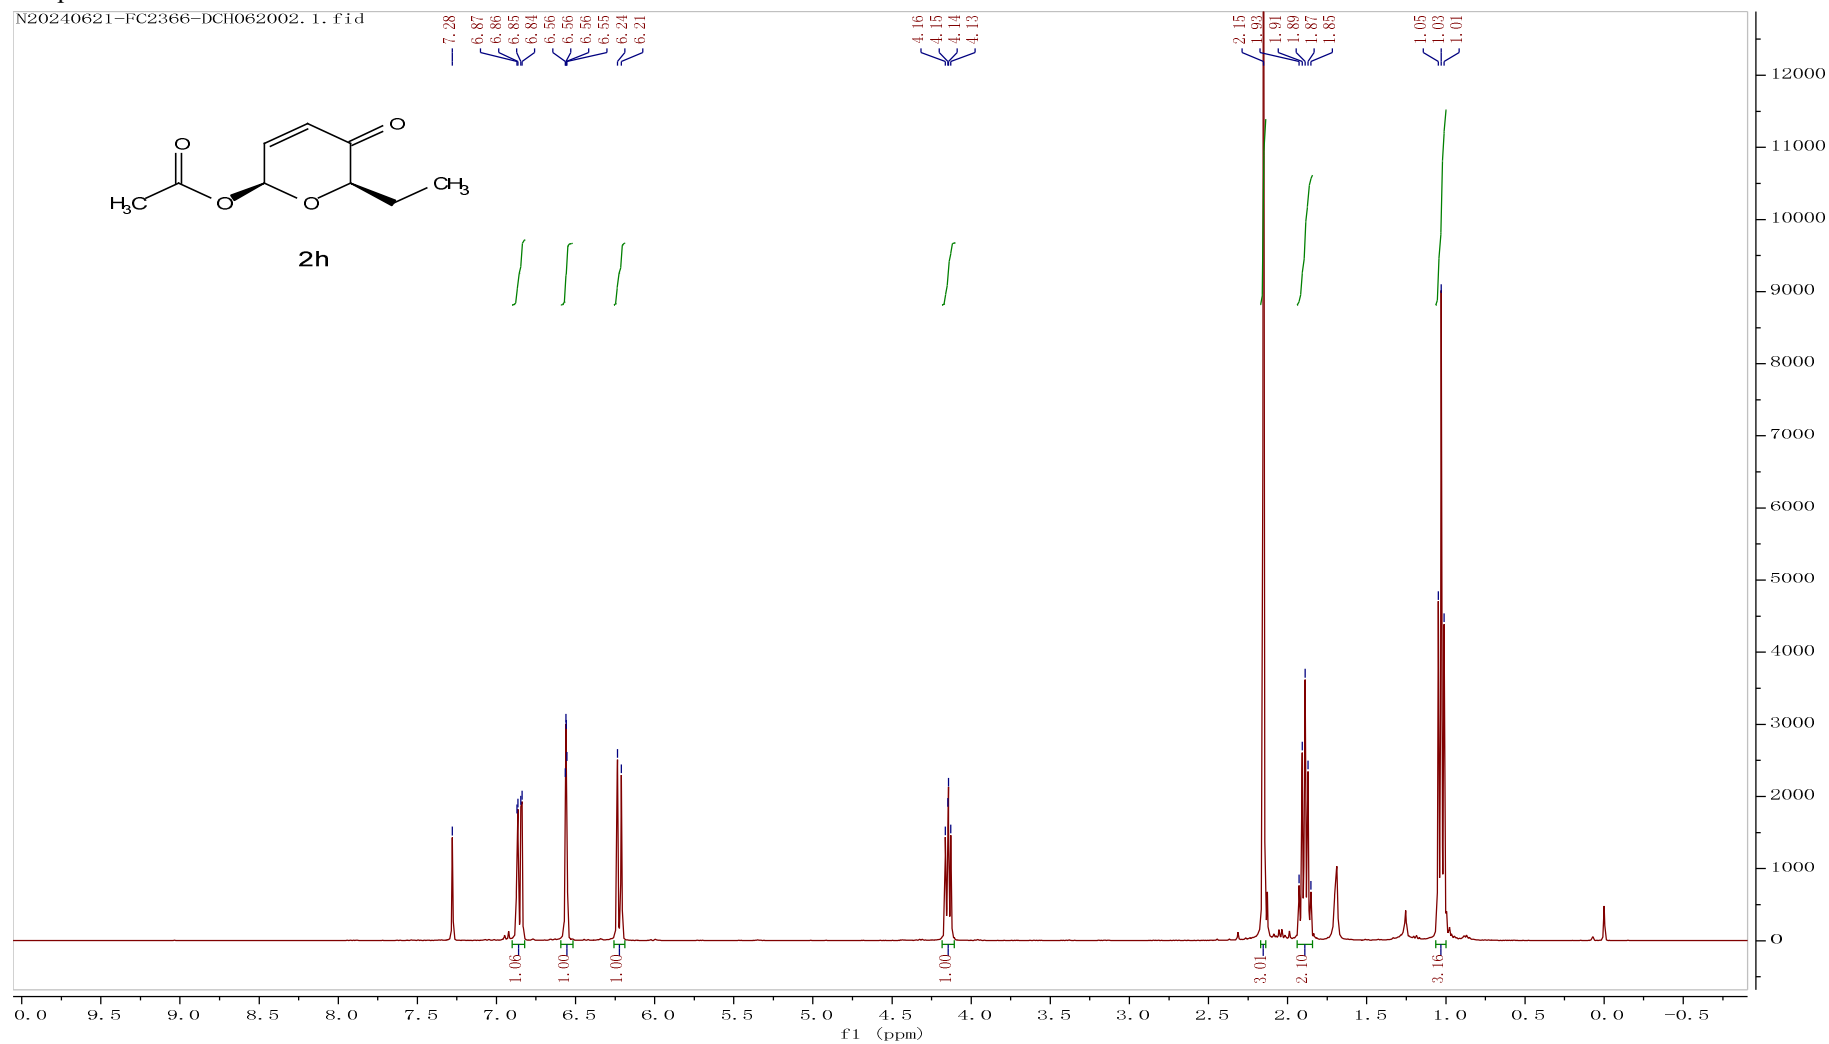

<sup>13</sup>C spectra of **2h**.

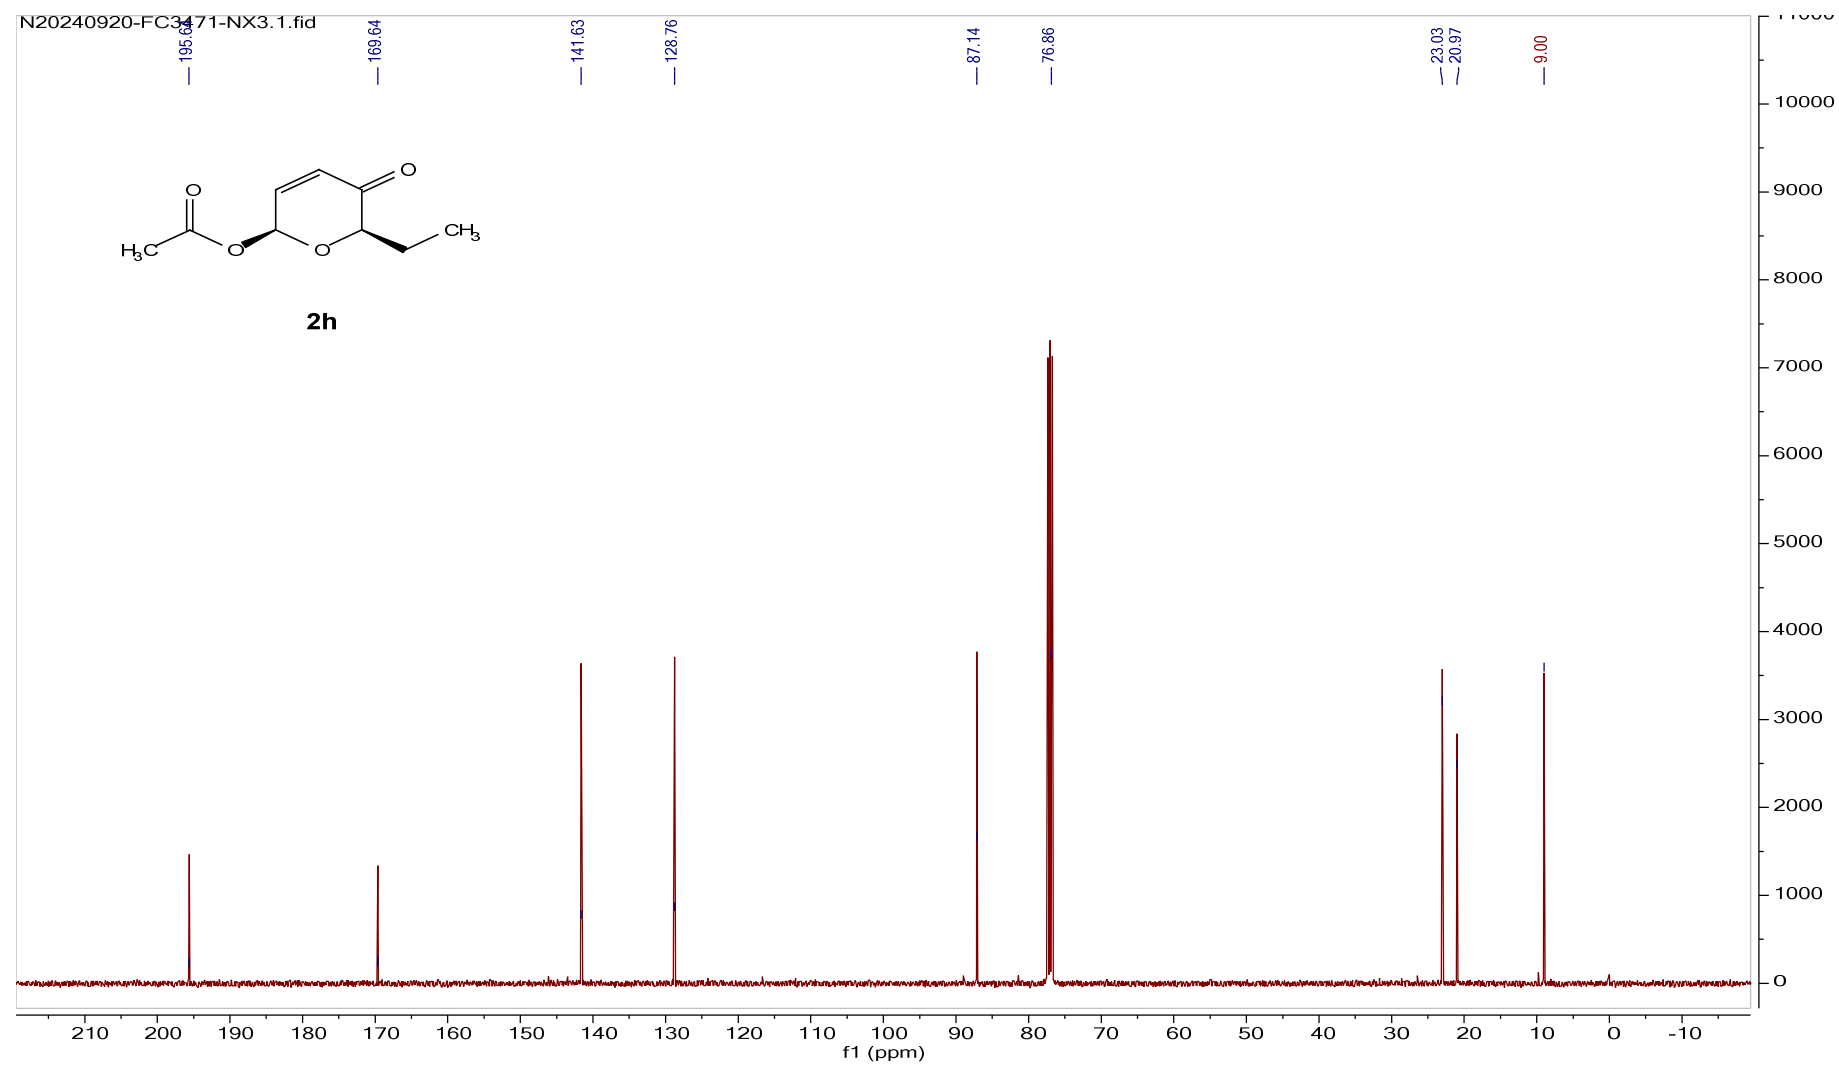

NOESY spectra of **2h**.

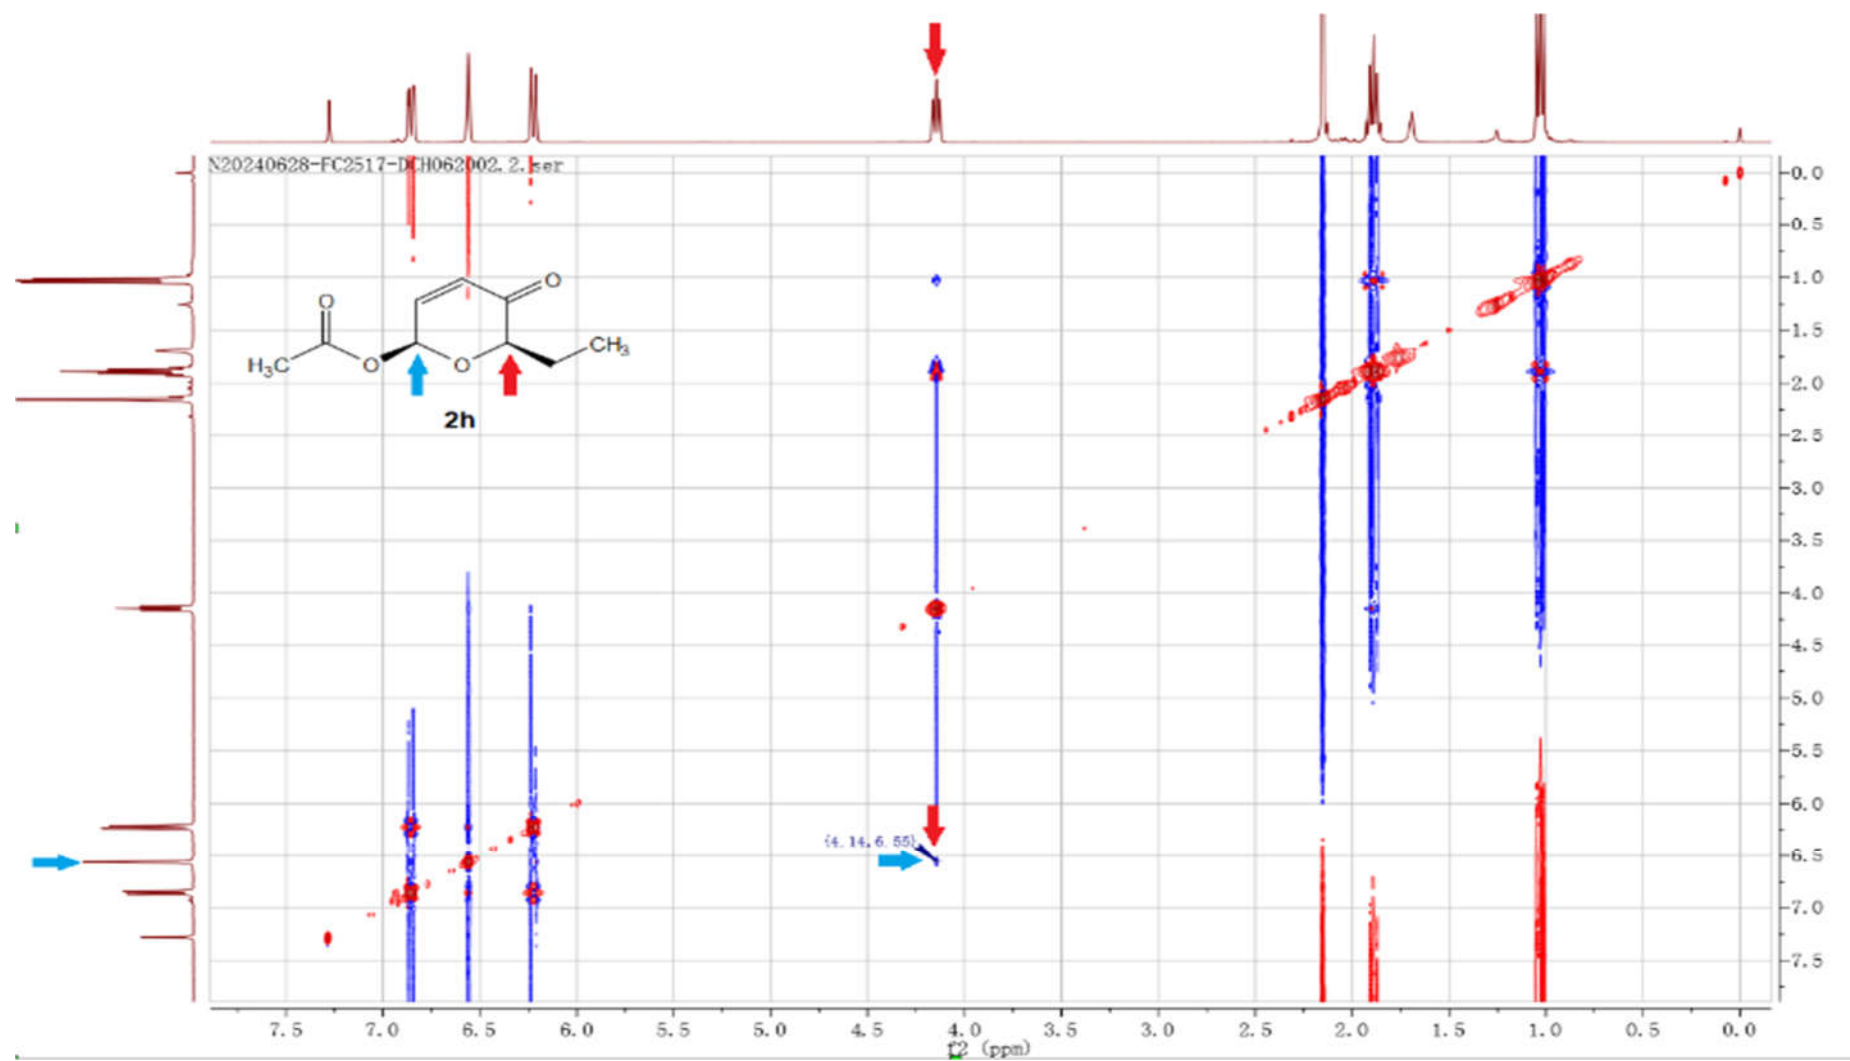

<sup>1</sup>H spectra of 2i.

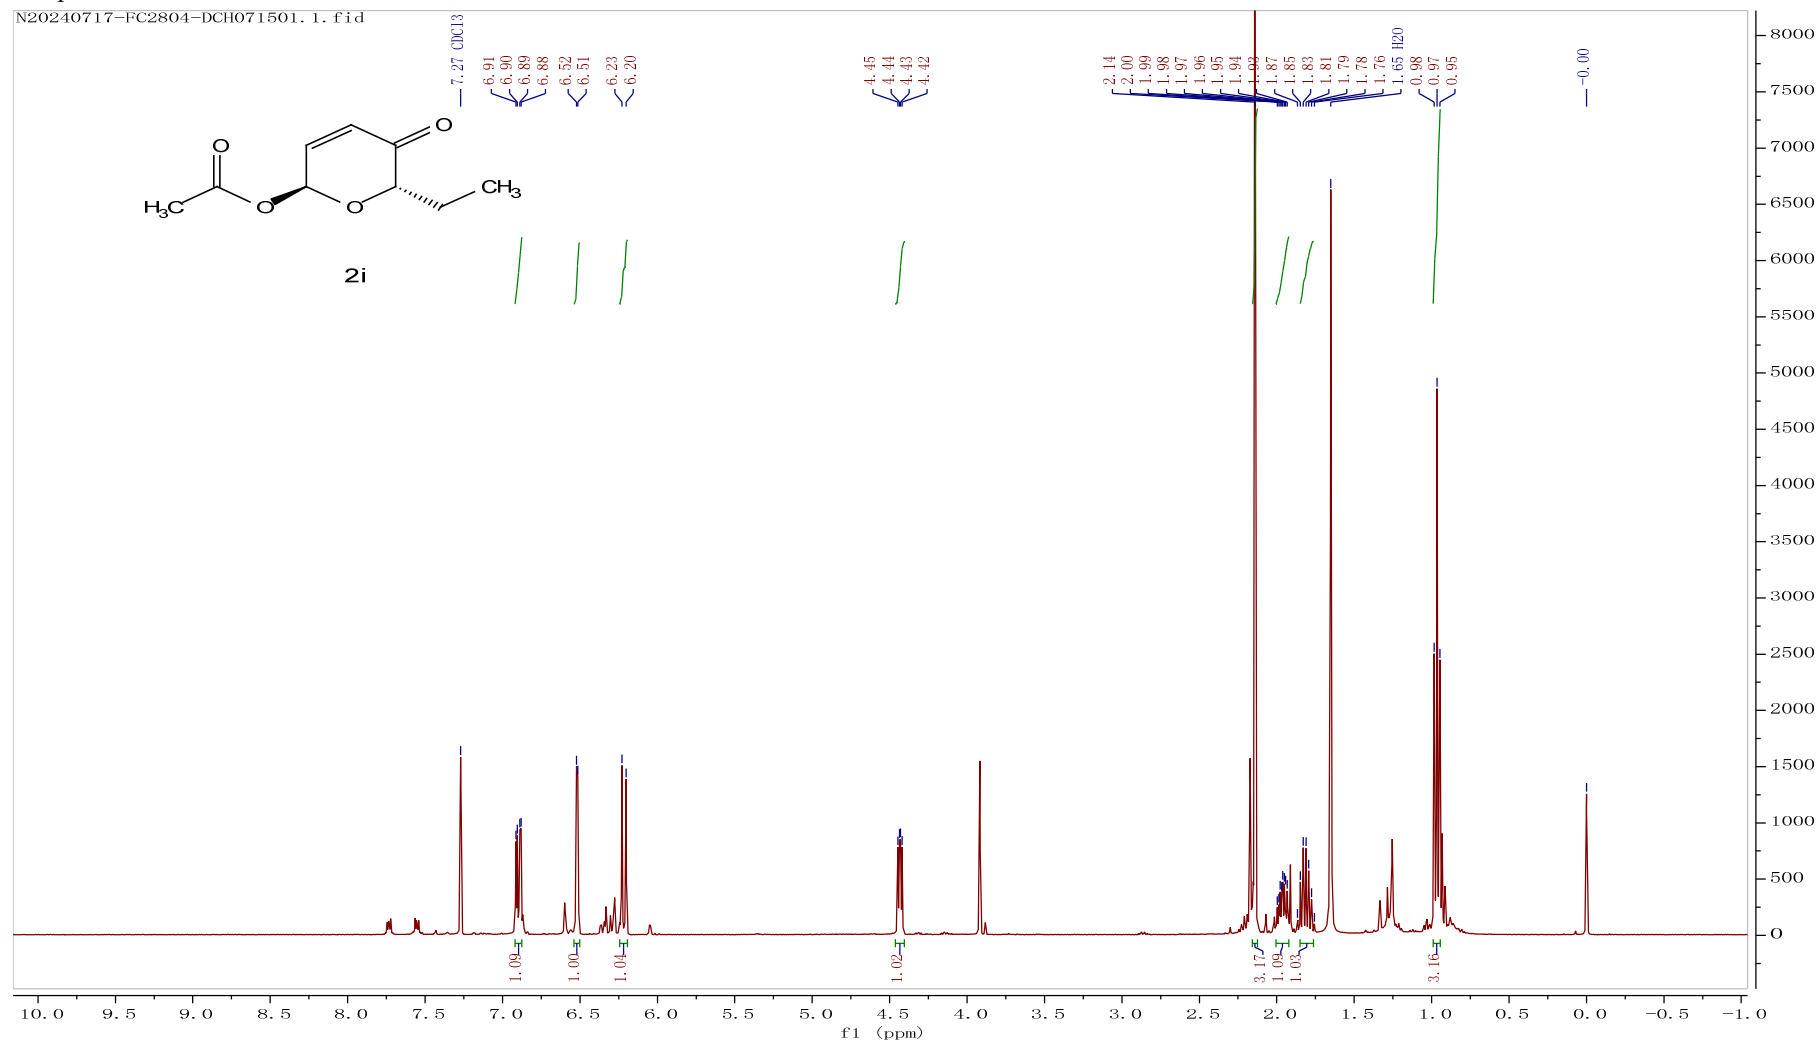

<sup>13</sup>C spectra of **2i**.

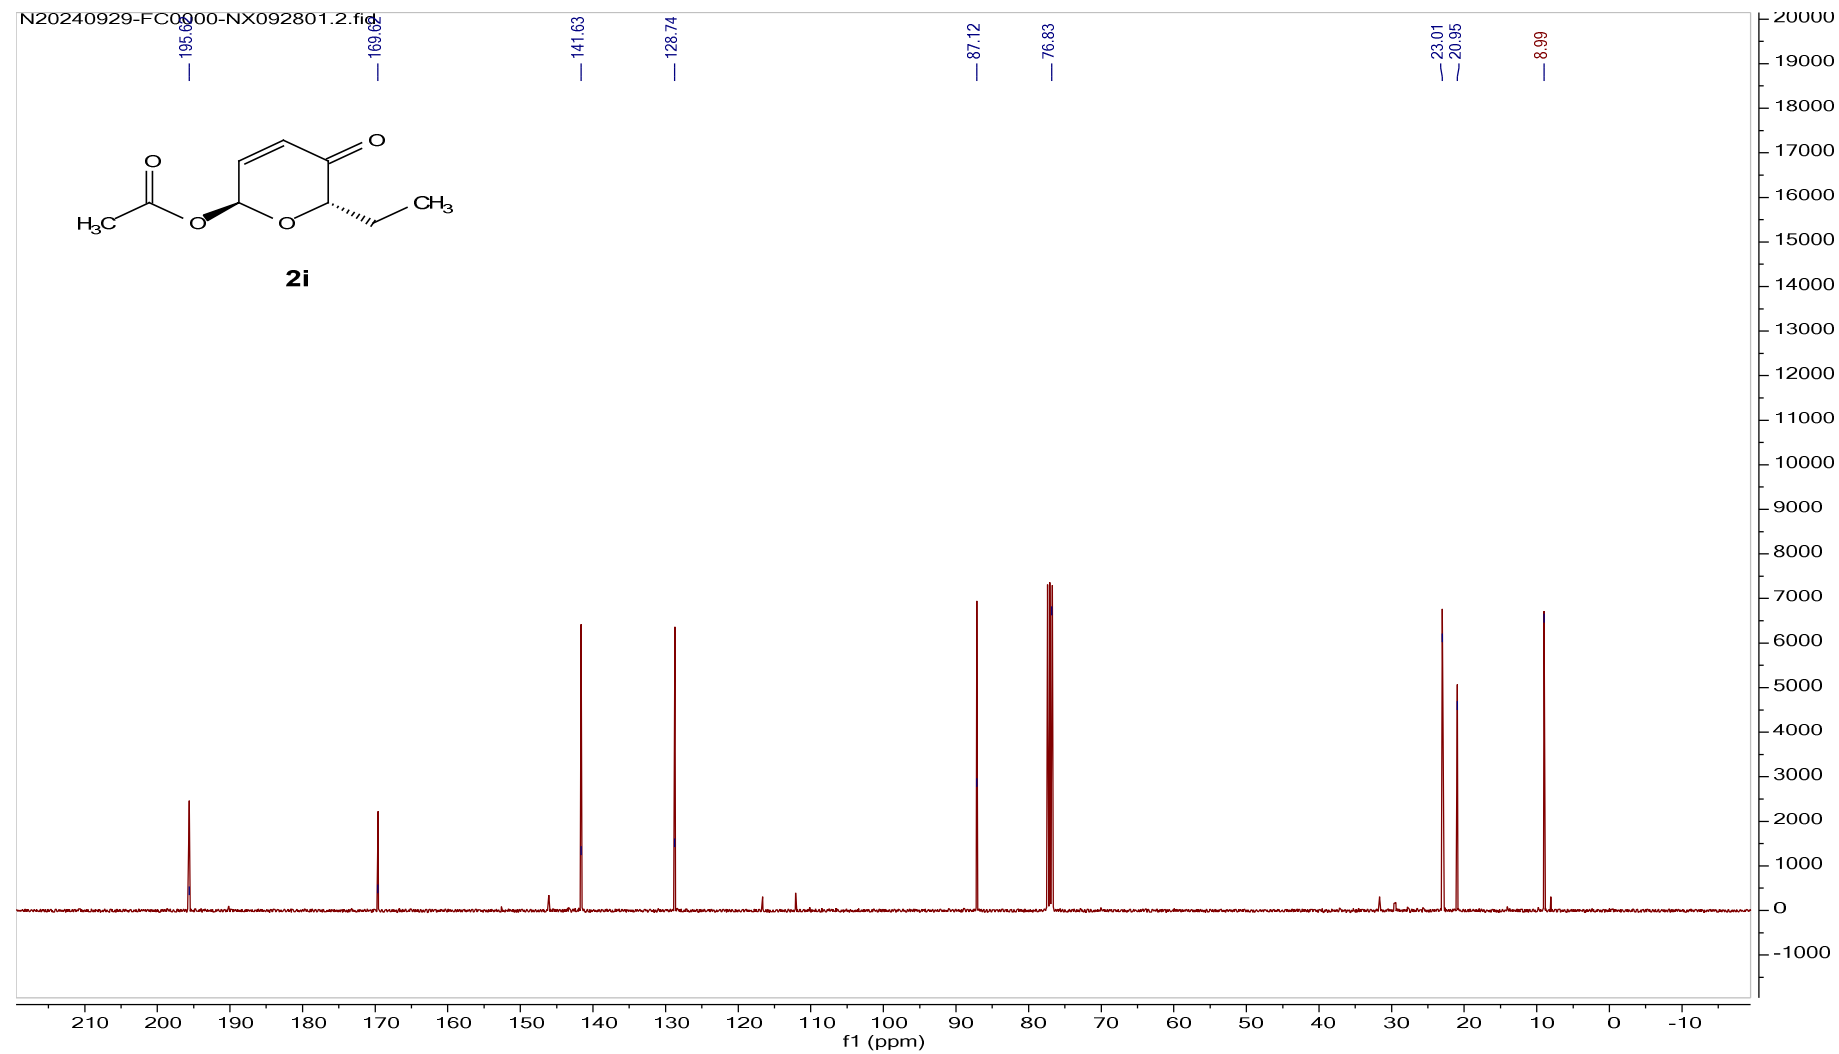

<sup>1</sup>H spectra of 2j.

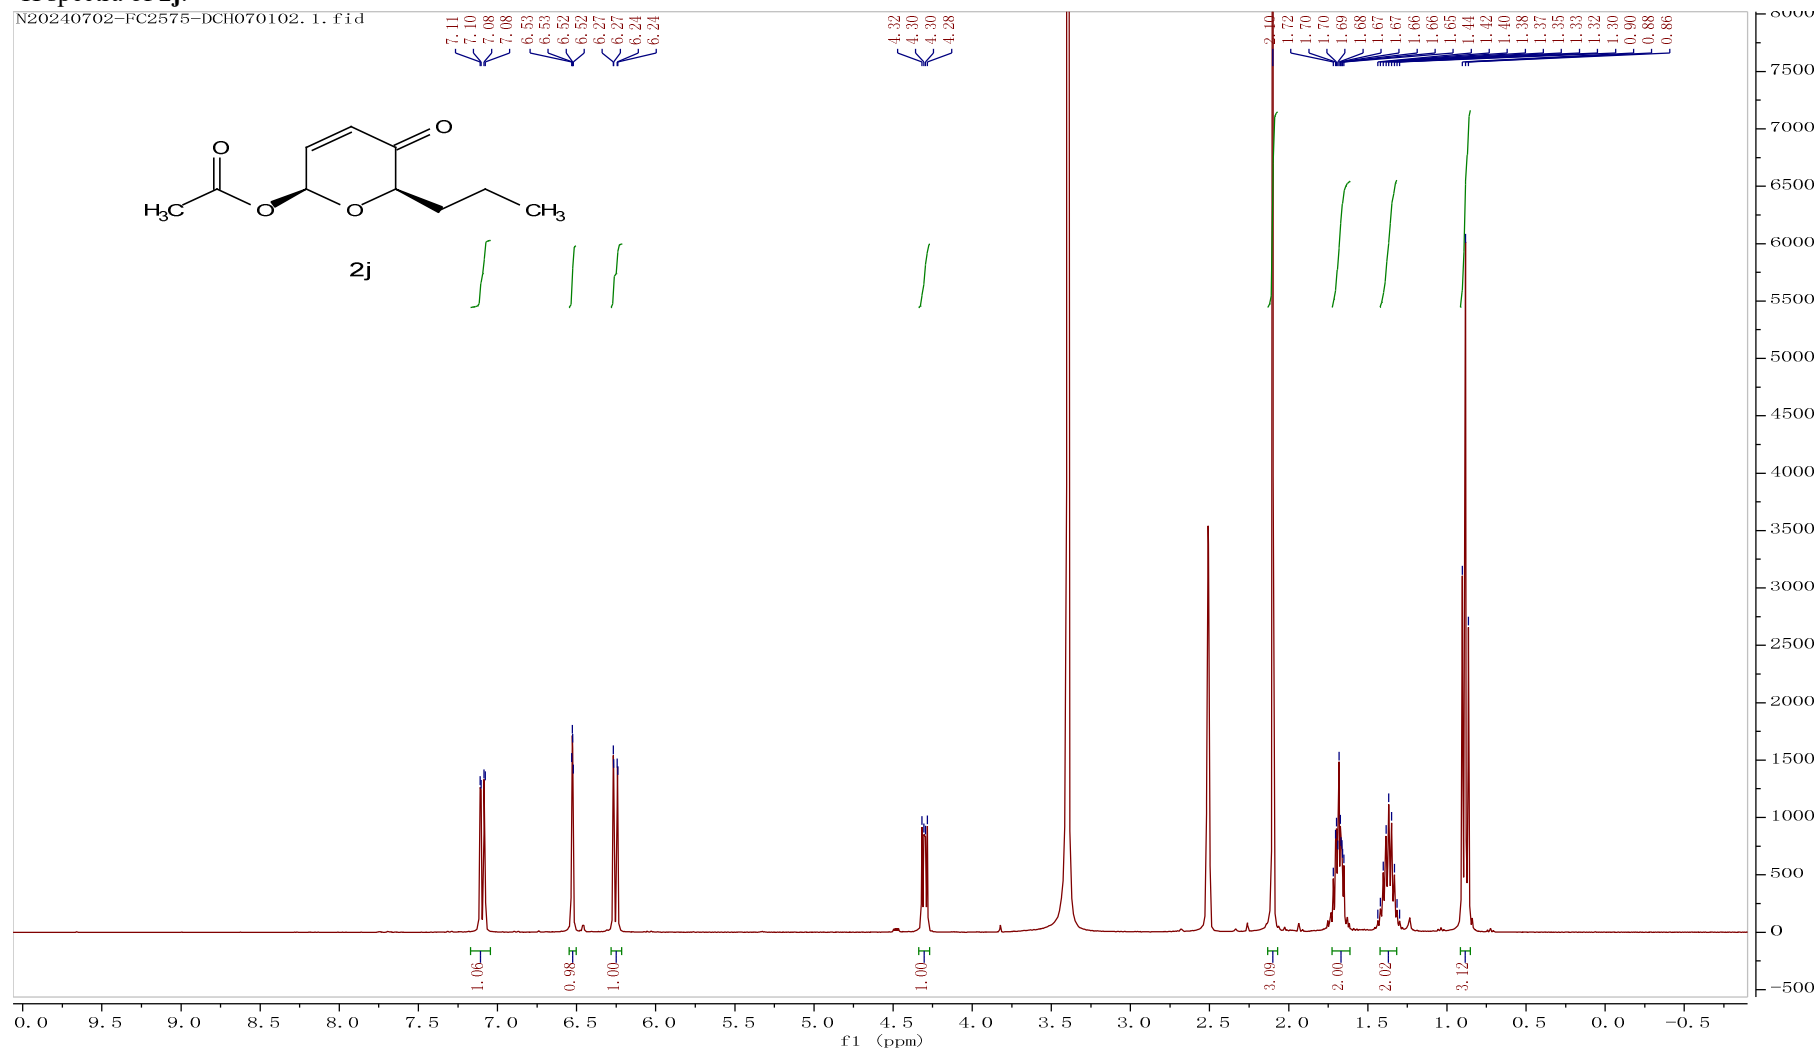

<sup>13</sup>C spectra of **2j**.

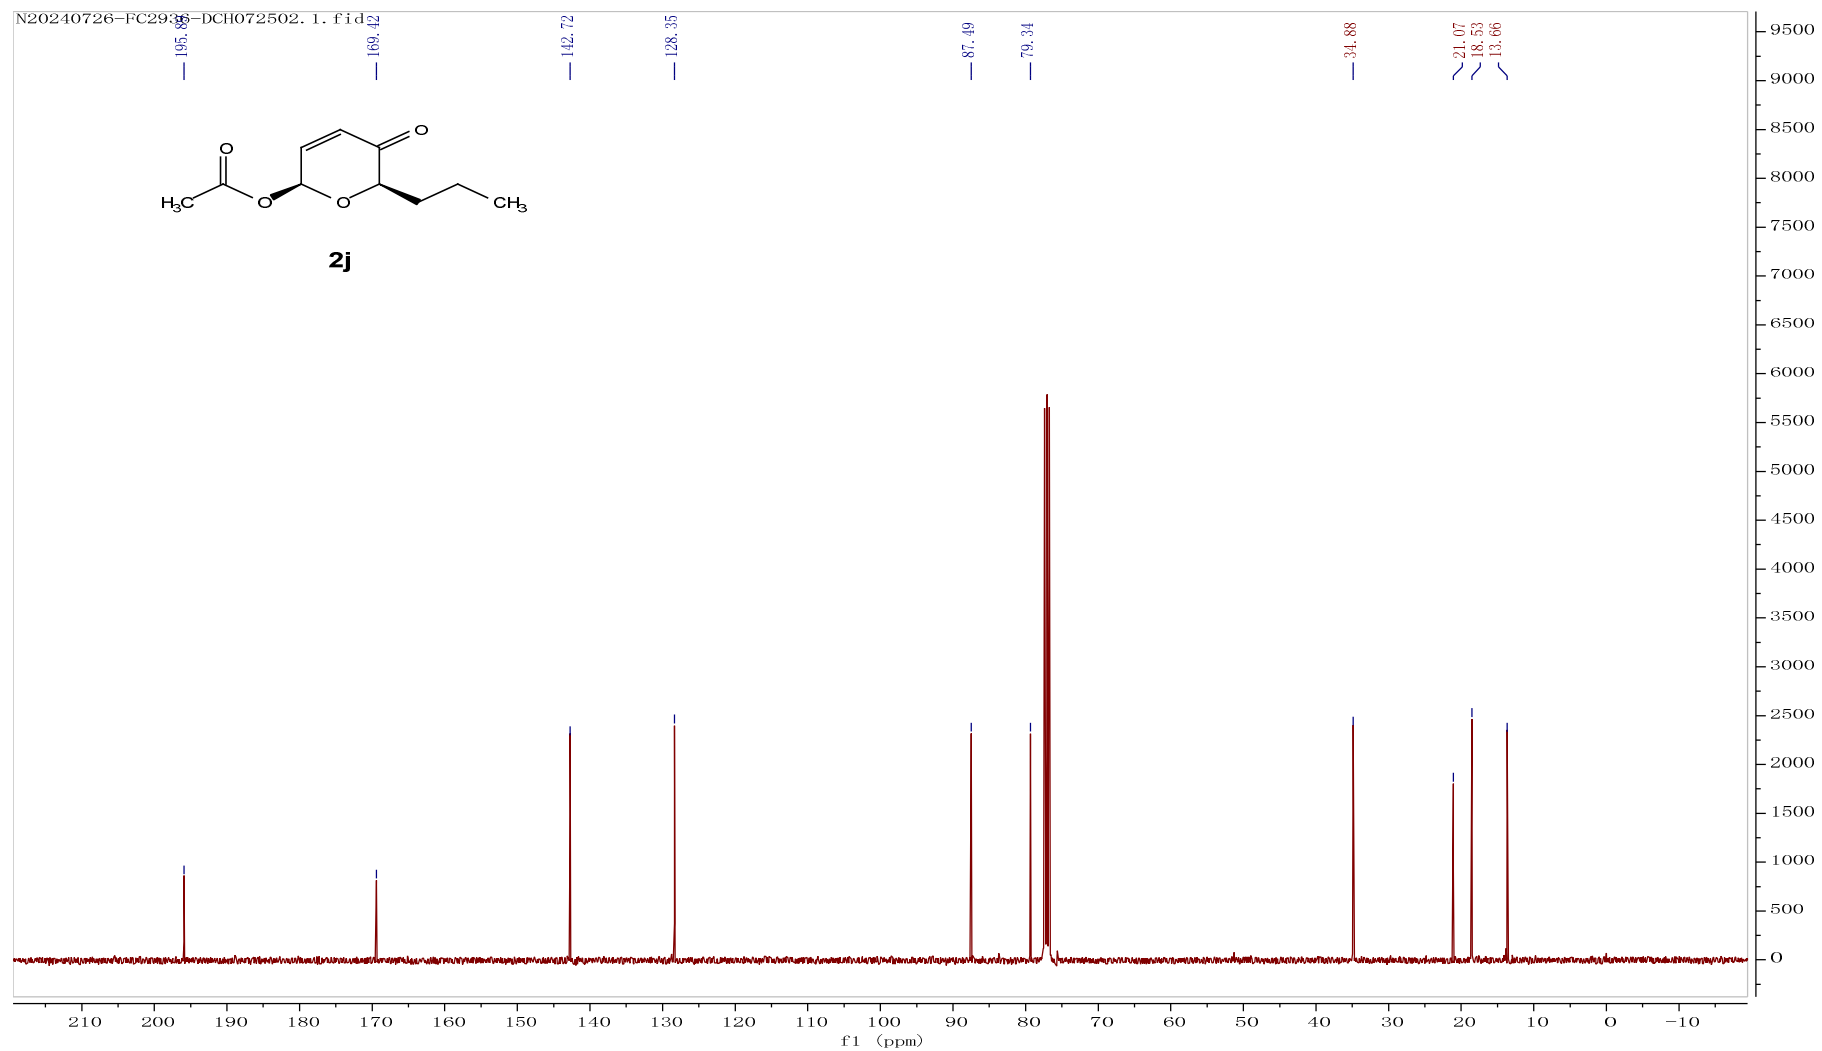



NOESY spectra of **2j**.

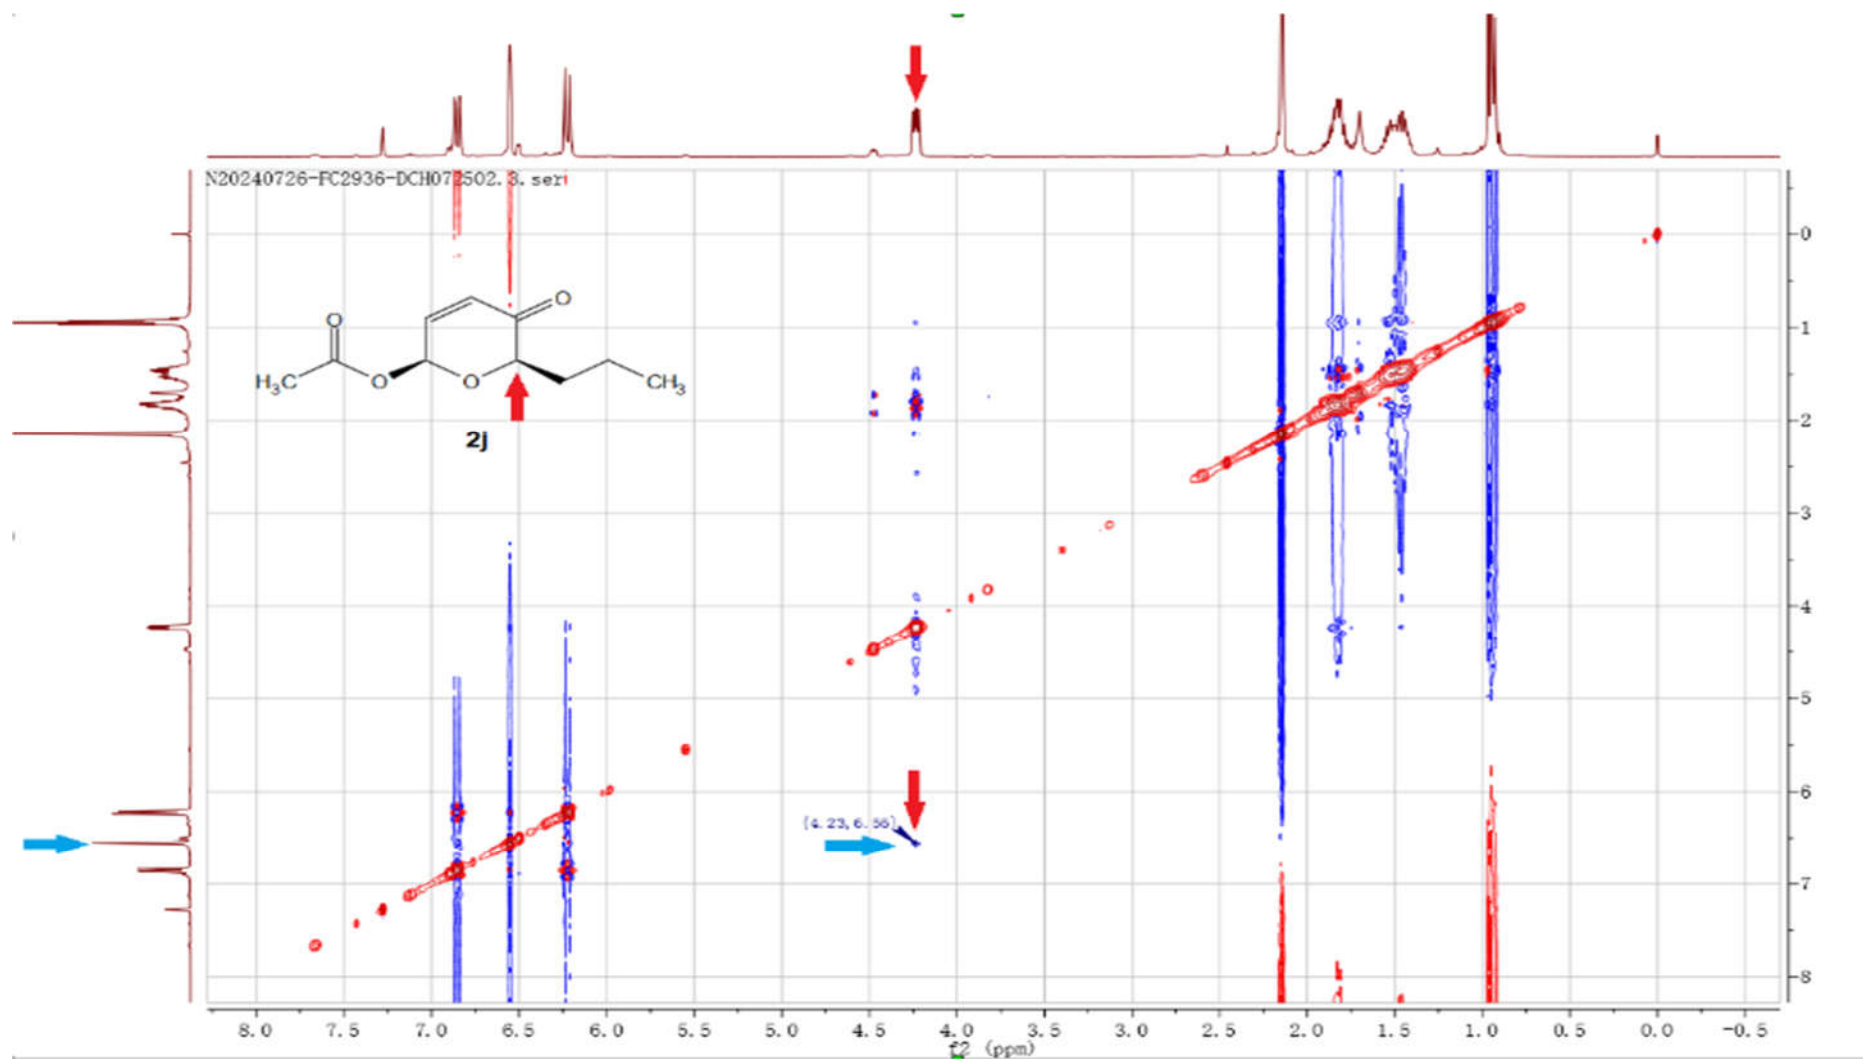

<sup>1</sup>H spectra of **3a**.

N20240416-FC1156-NX041501.1.fid

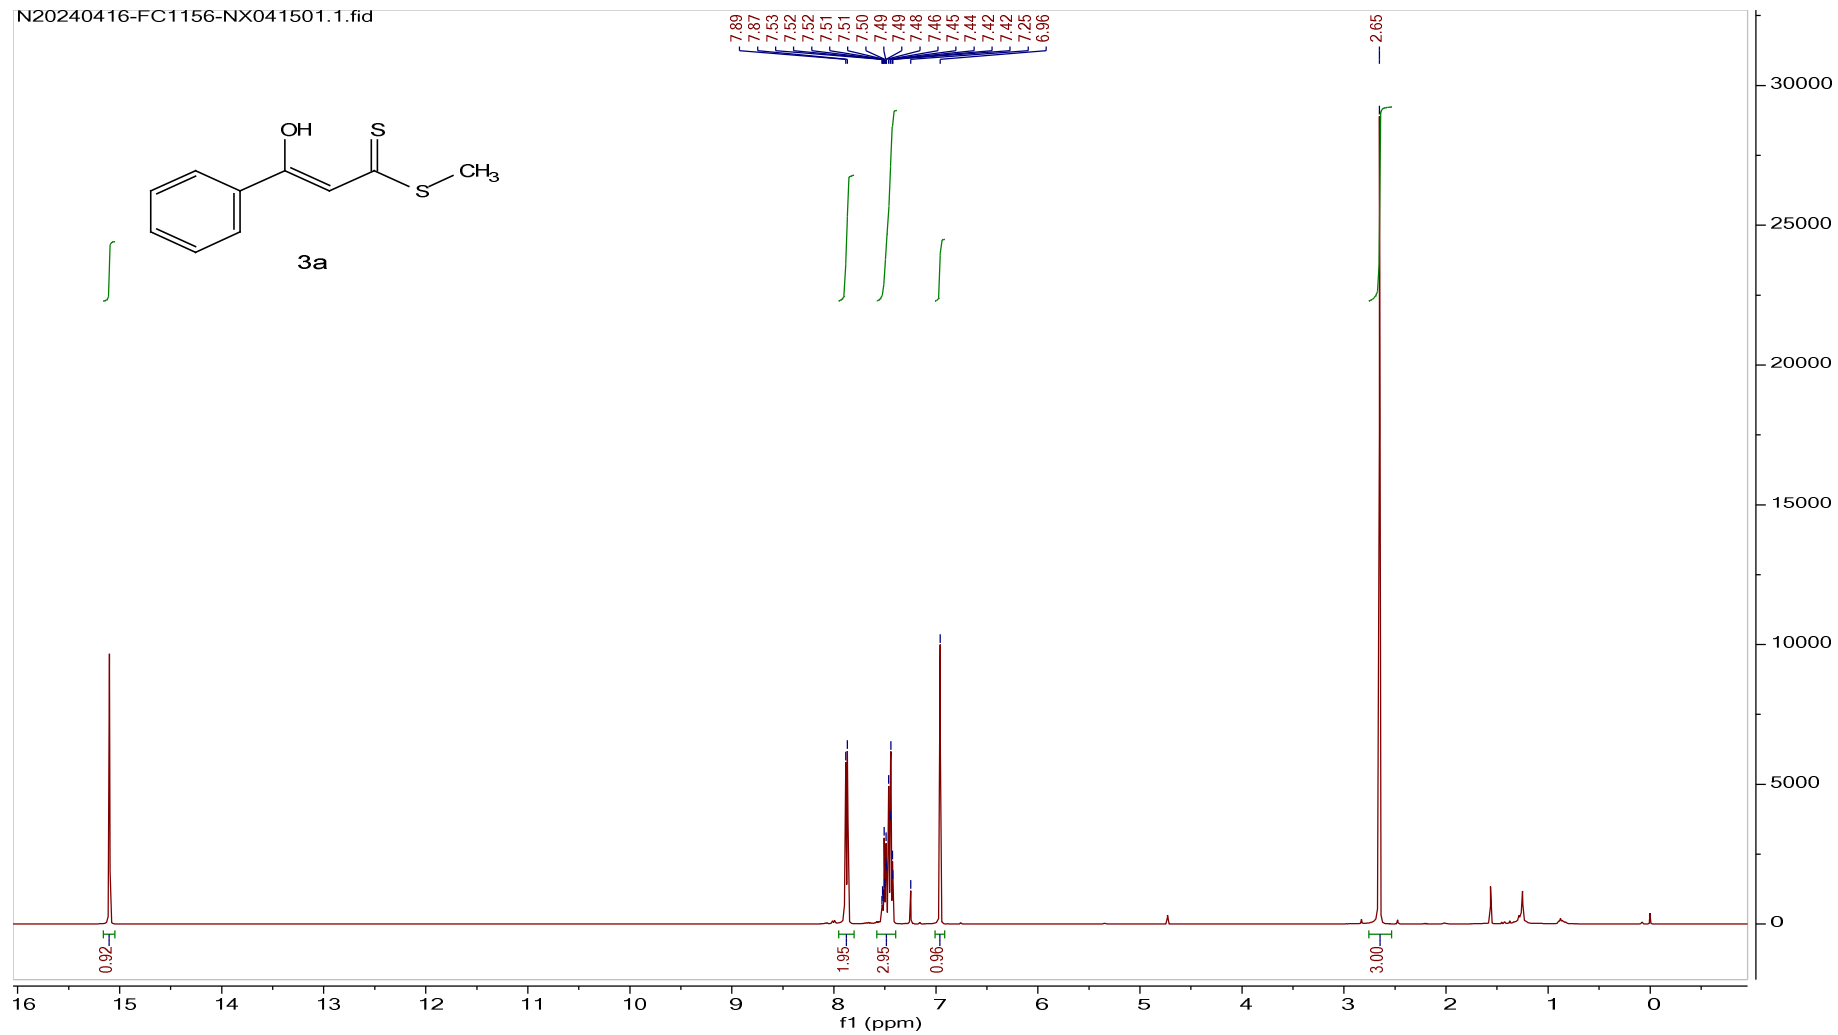

<sup>1</sup>H spectra of **3b**.

N20240701-FC2552-NX063001.1.fid

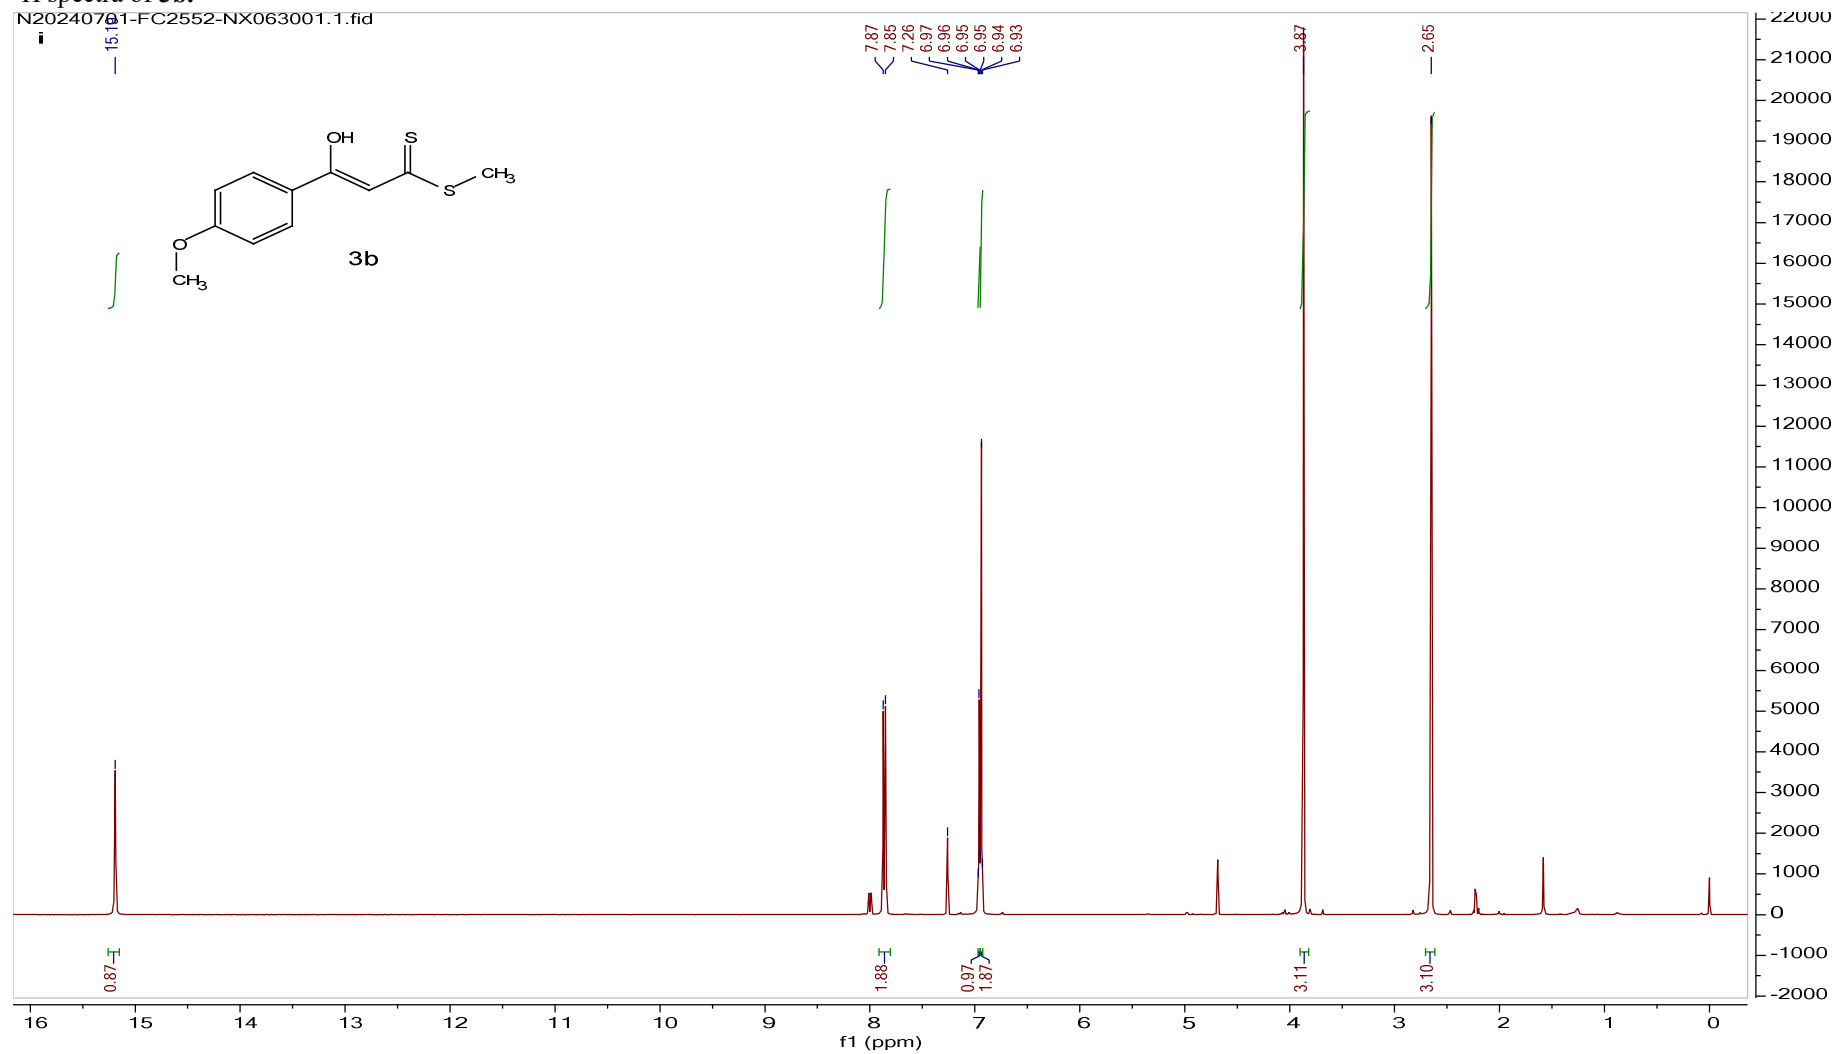

<sup>1</sup>H spectra of **3c**.

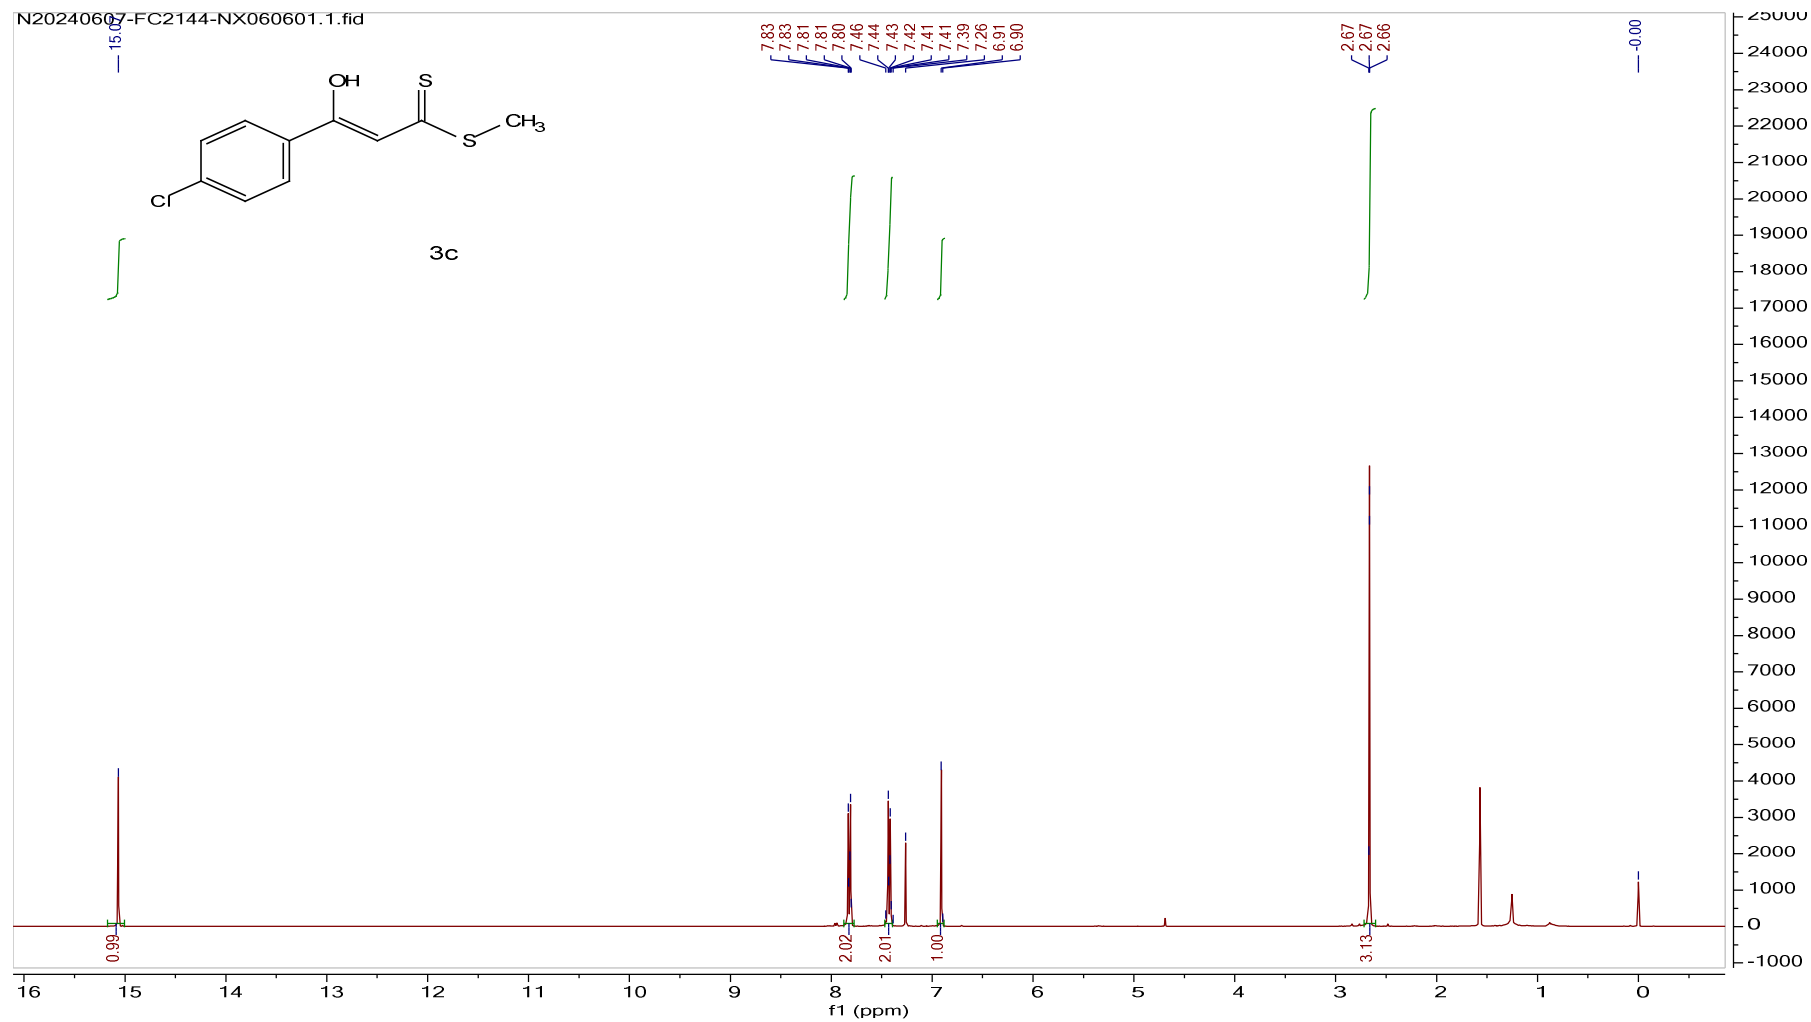

<sup>1</sup>H spectra of **3d**.

N20240719-FC2844-NX071801.1.fid

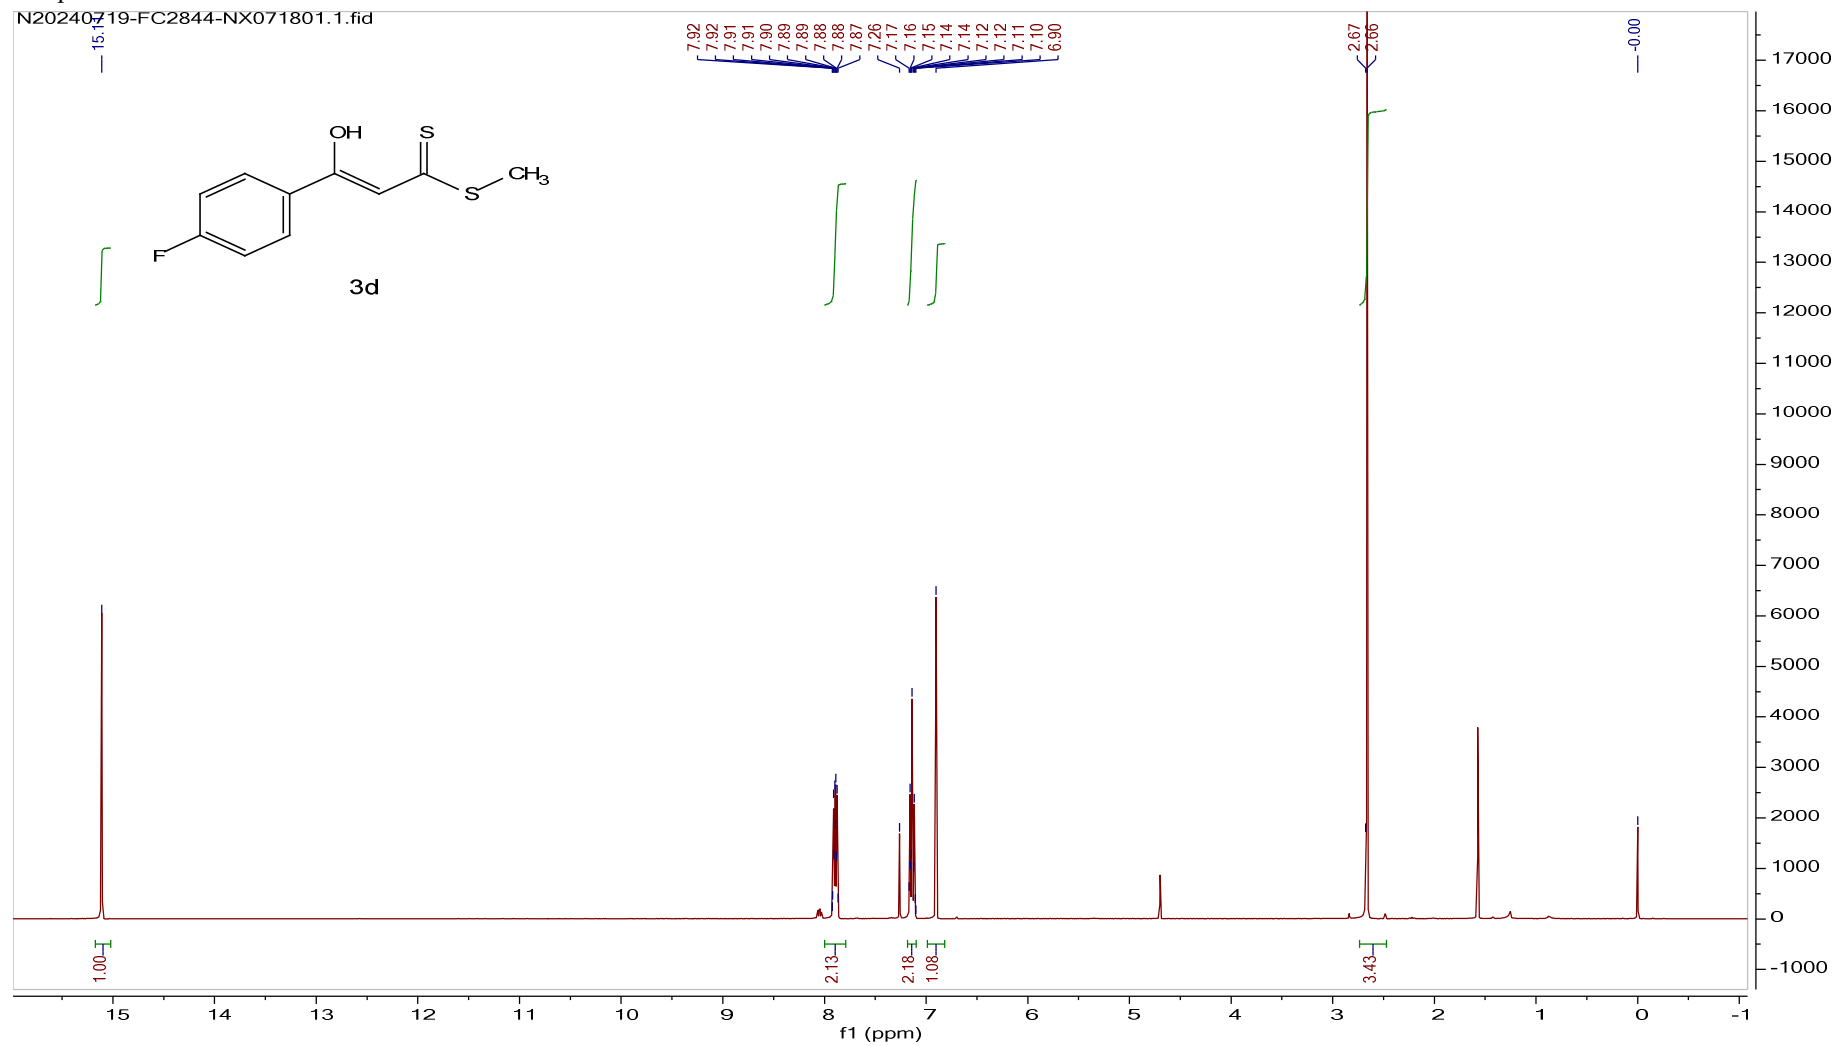

<sup>1</sup>H spectra of **3e**.

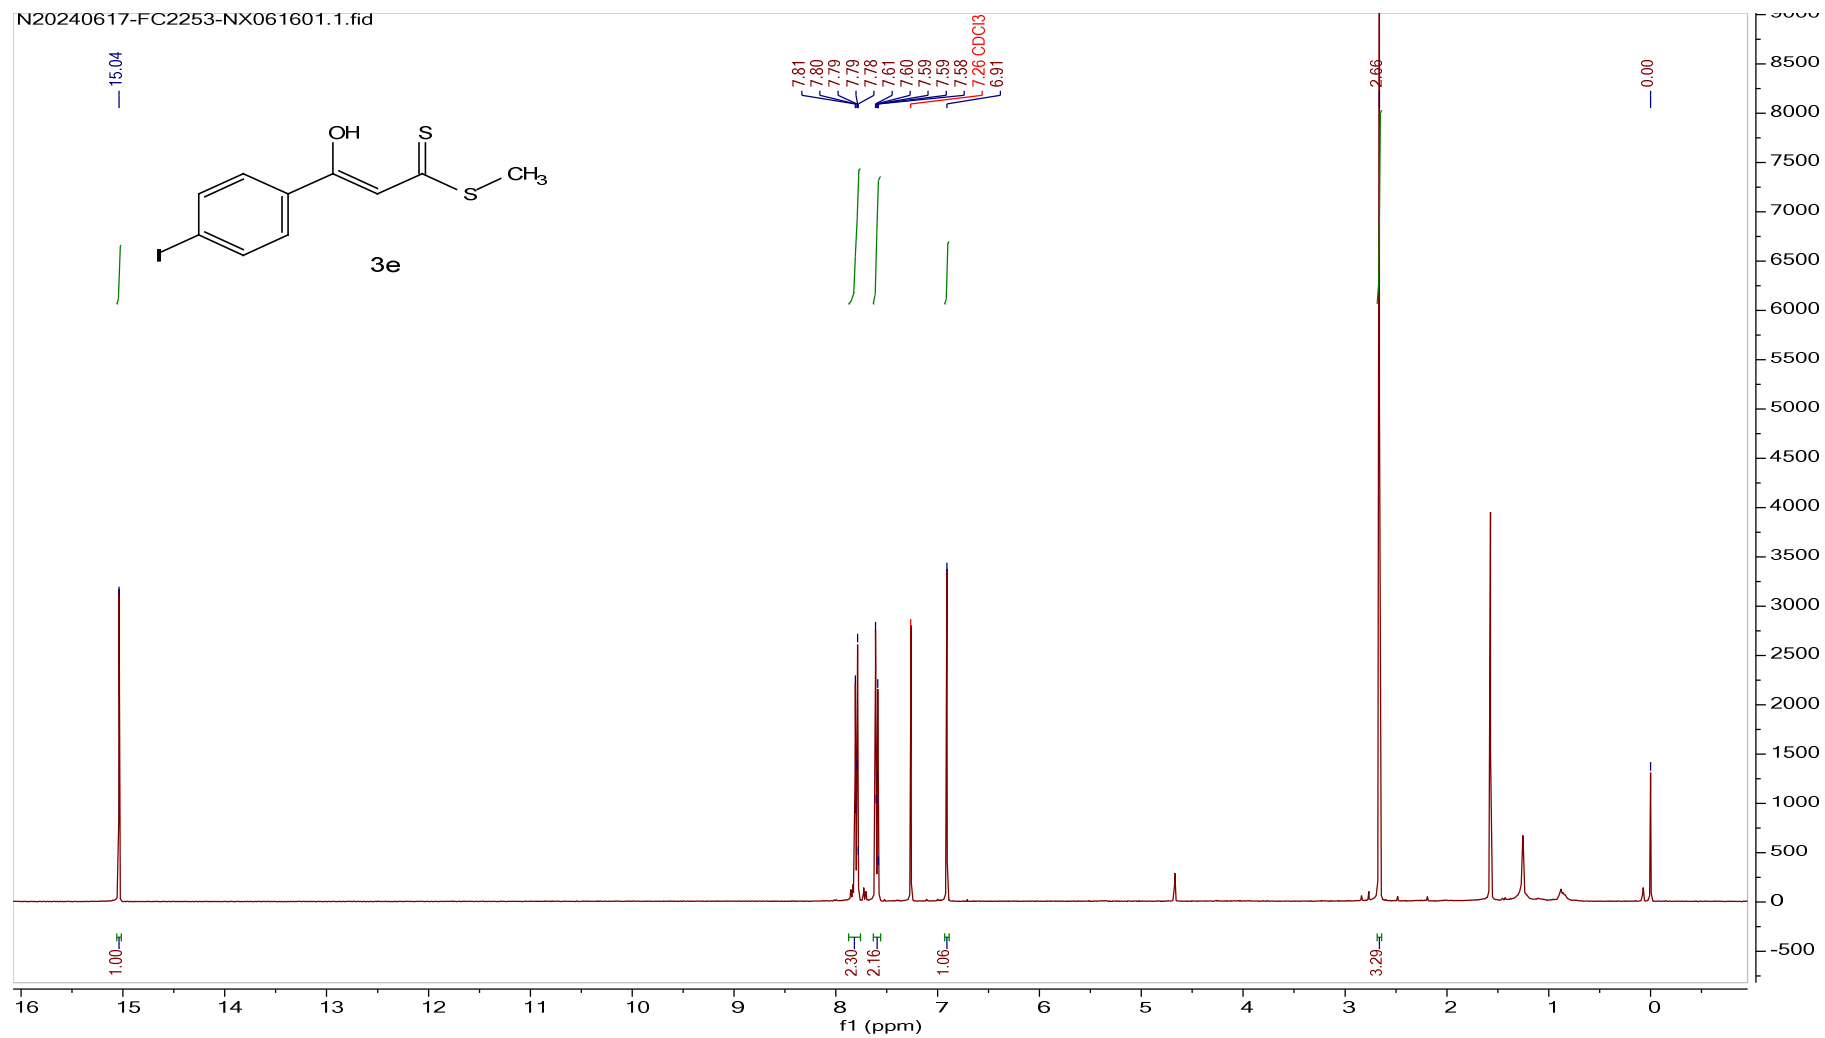

<sup>1</sup>H spectra of 4a.

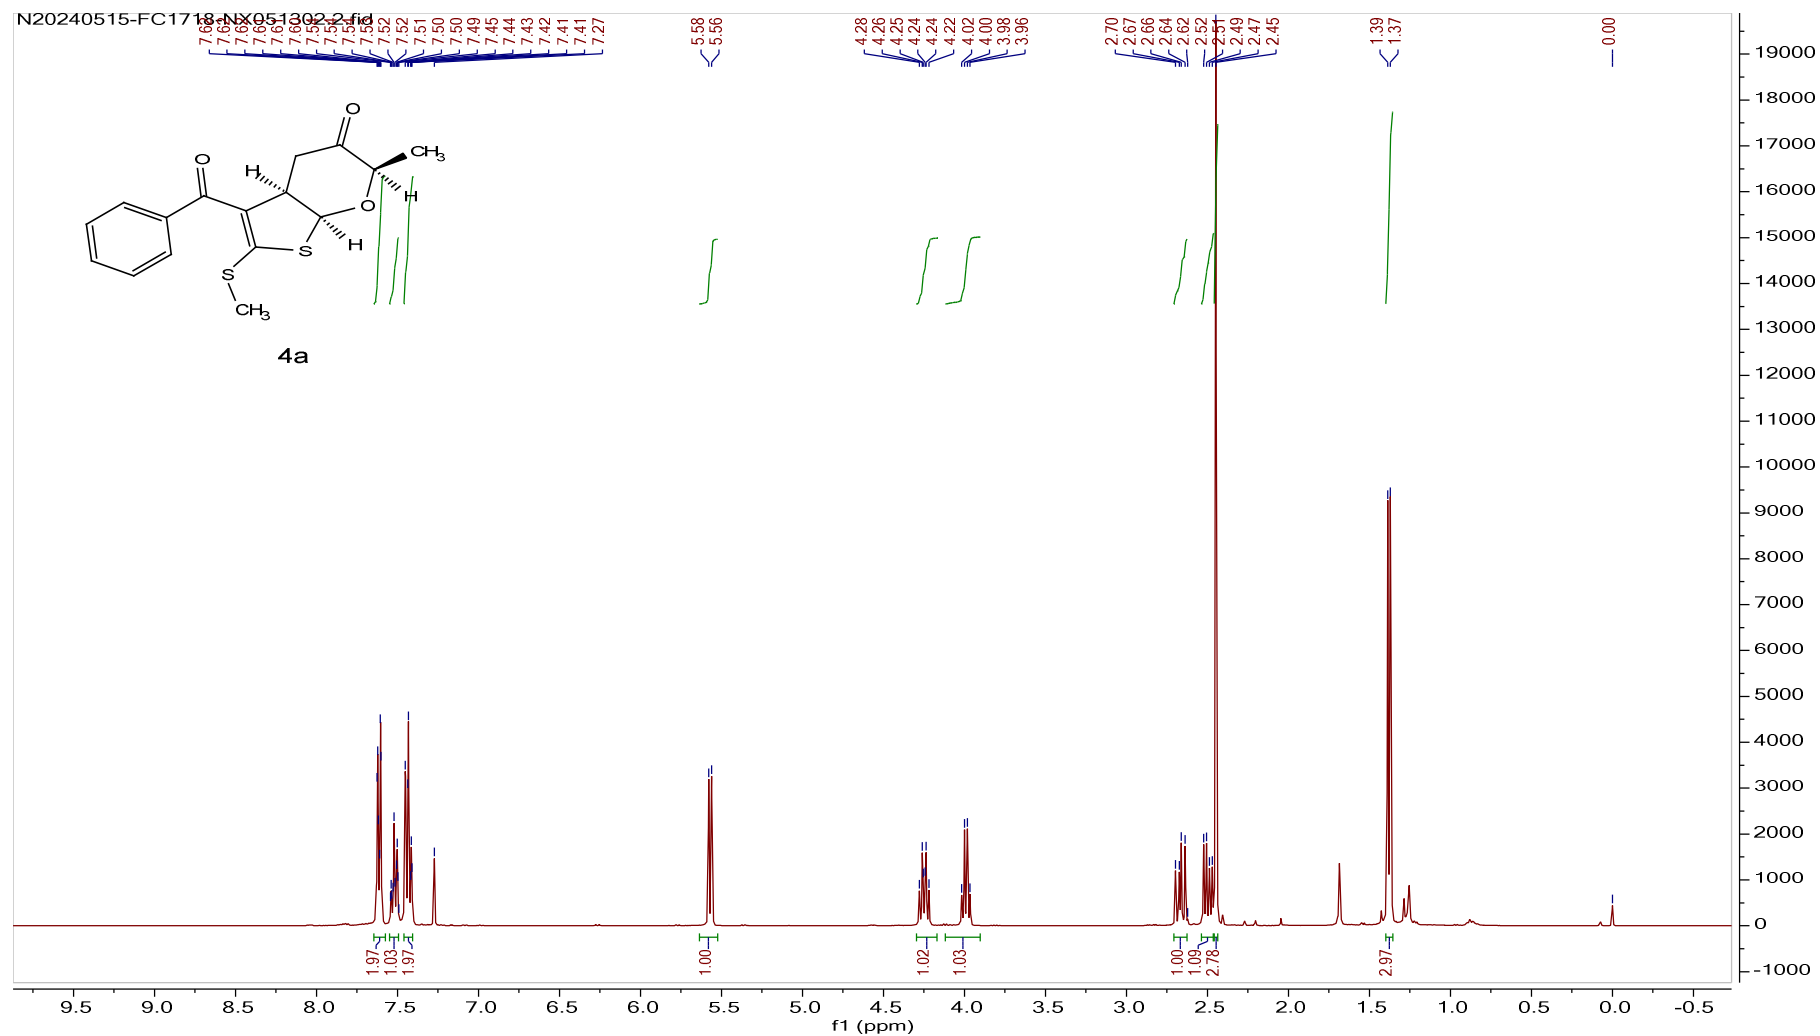

<sup>13</sup>C spectra of **4a**.

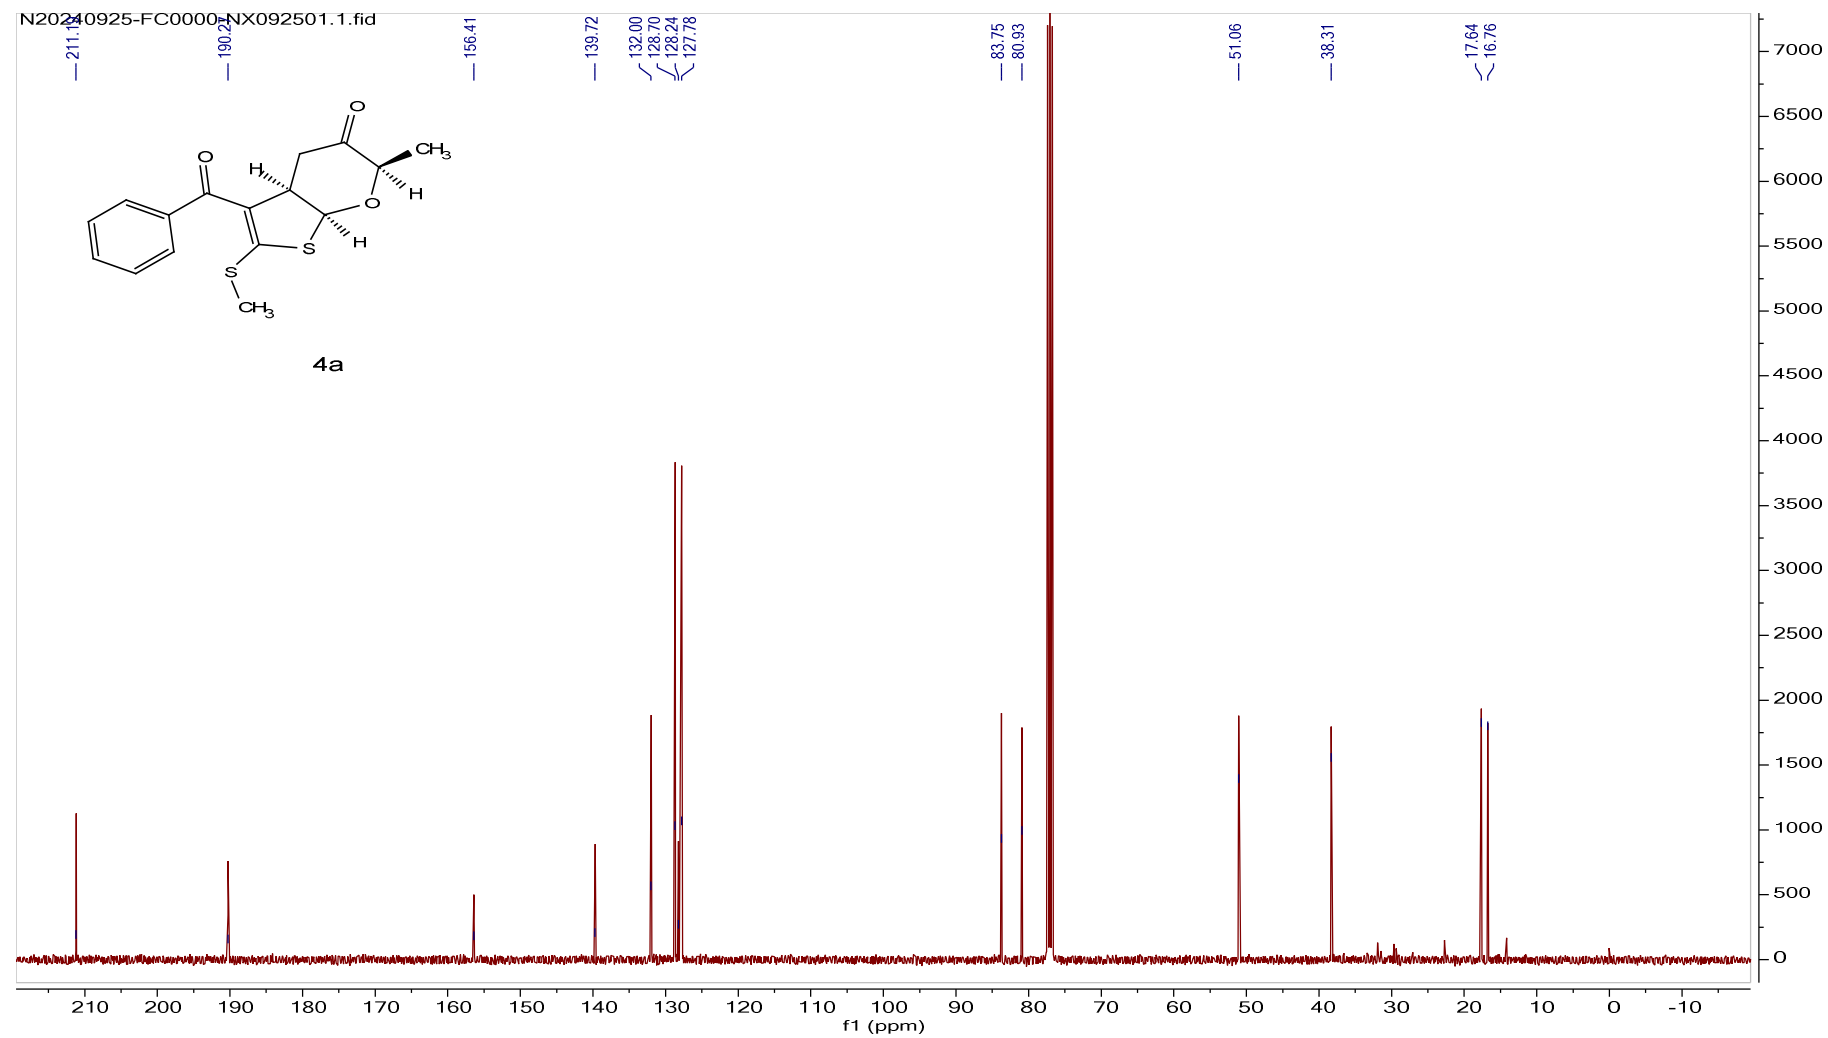



NOESY spectra of **4a**.

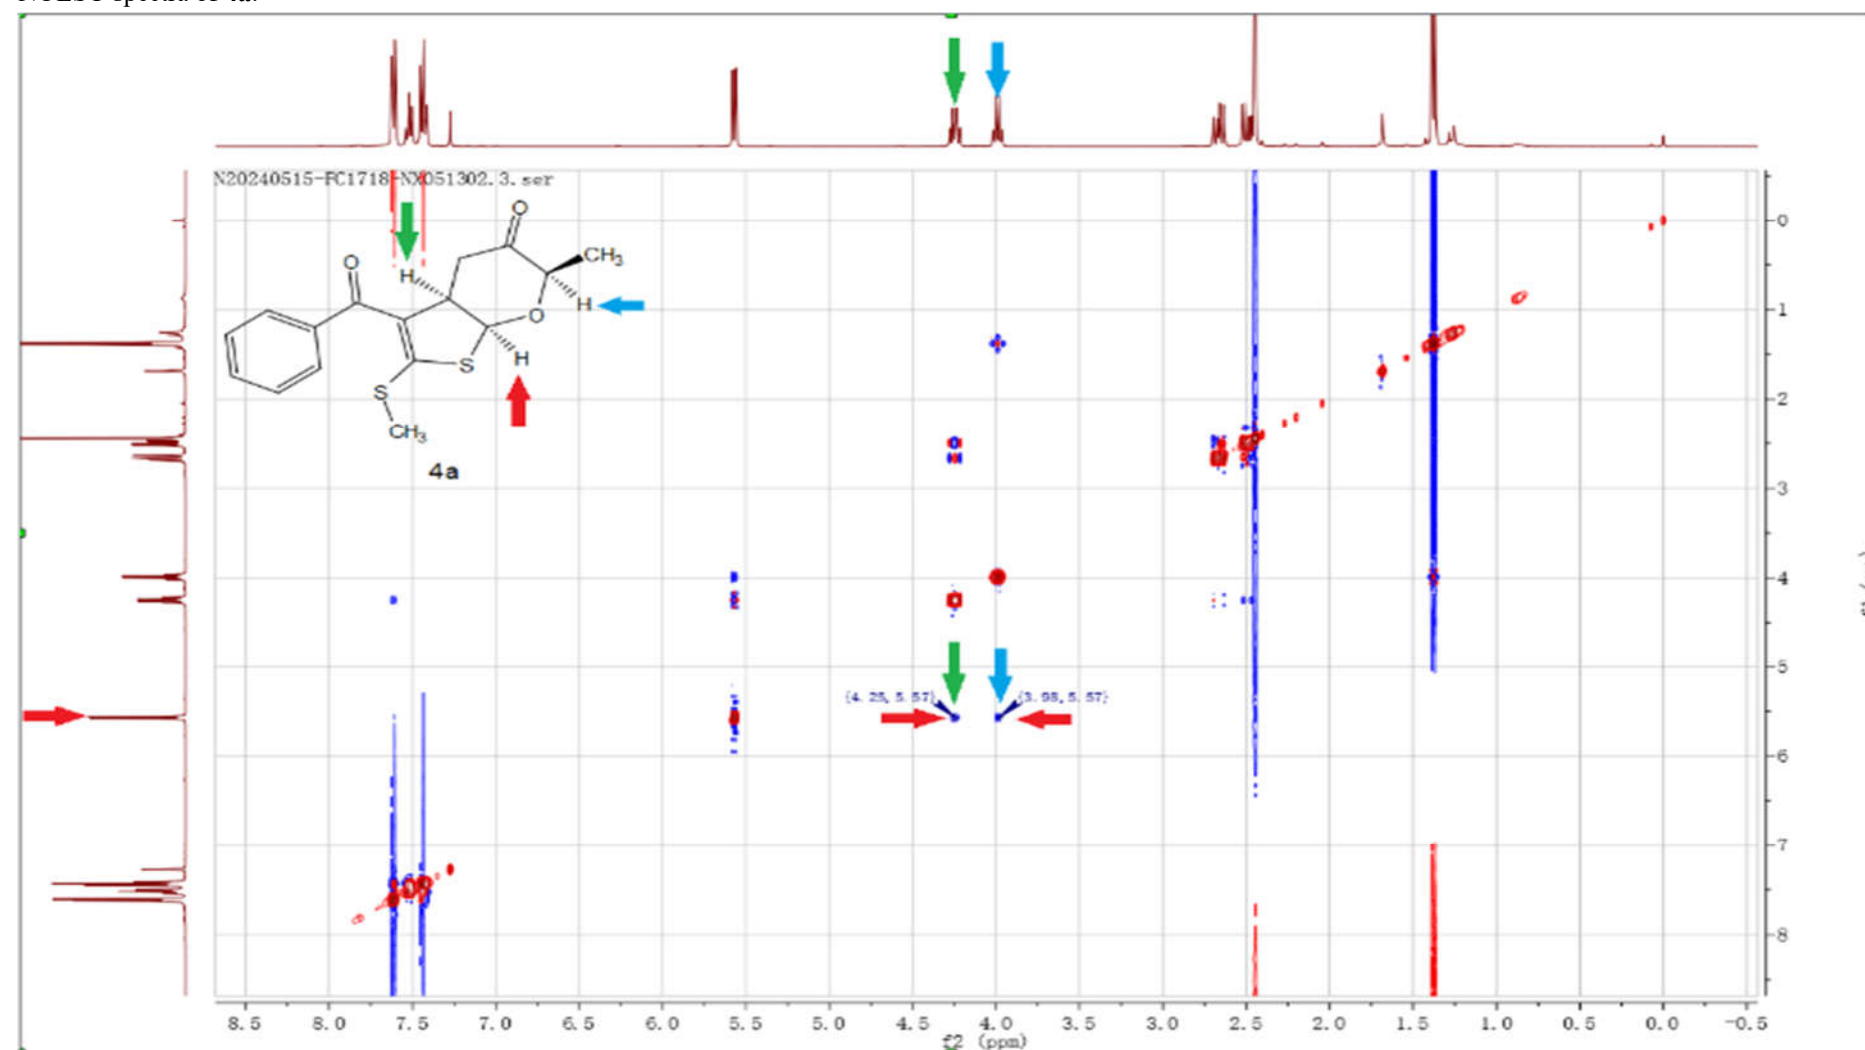

HRMS of 4a.

### Single Mass Analysis

Tolerance = 5.0 mDa / DBE: min = -1.5, max = 50.0

Element prediction: Off

Number of isotope peaks used for i-FIT = 3

Monoisotopic Mass, Even Electron Ions

2354 formula(e) evaluated with 1 results within limits (up to 50 best isotopic matches for each mass)

Elements Used:

C: 16-16 H: 16-16 N: 0-100 O: 0-100 Na: 0-4 S: 1-4

32

240910-5-647-1-4A21 (0.147)

1: TOF MS ES+  
9.36e+005

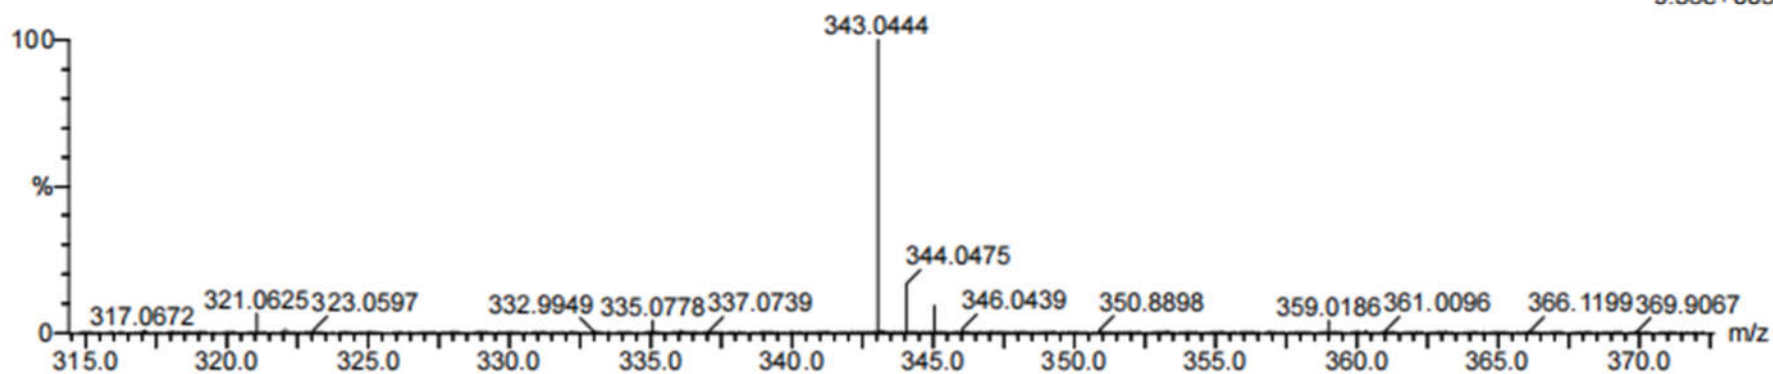

Minimum: -1.5  
Maximum: 5.0 10.0 50.0

| Mass     | Calc. Mass | mDa | PPM | DBE | i-FIT  | Norm | Conf (%) | Formula          |
|----------|------------|-----|-----|-----|--------|------|----------|------------------|
| 343.0444 | 343.0439   | 0.5 | 1.5 | 8.5 | 1018.9 | n/a  | n/a      | C16 H16 O3 Na S2 |

<sup>1</sup>H spectra of **4b**.

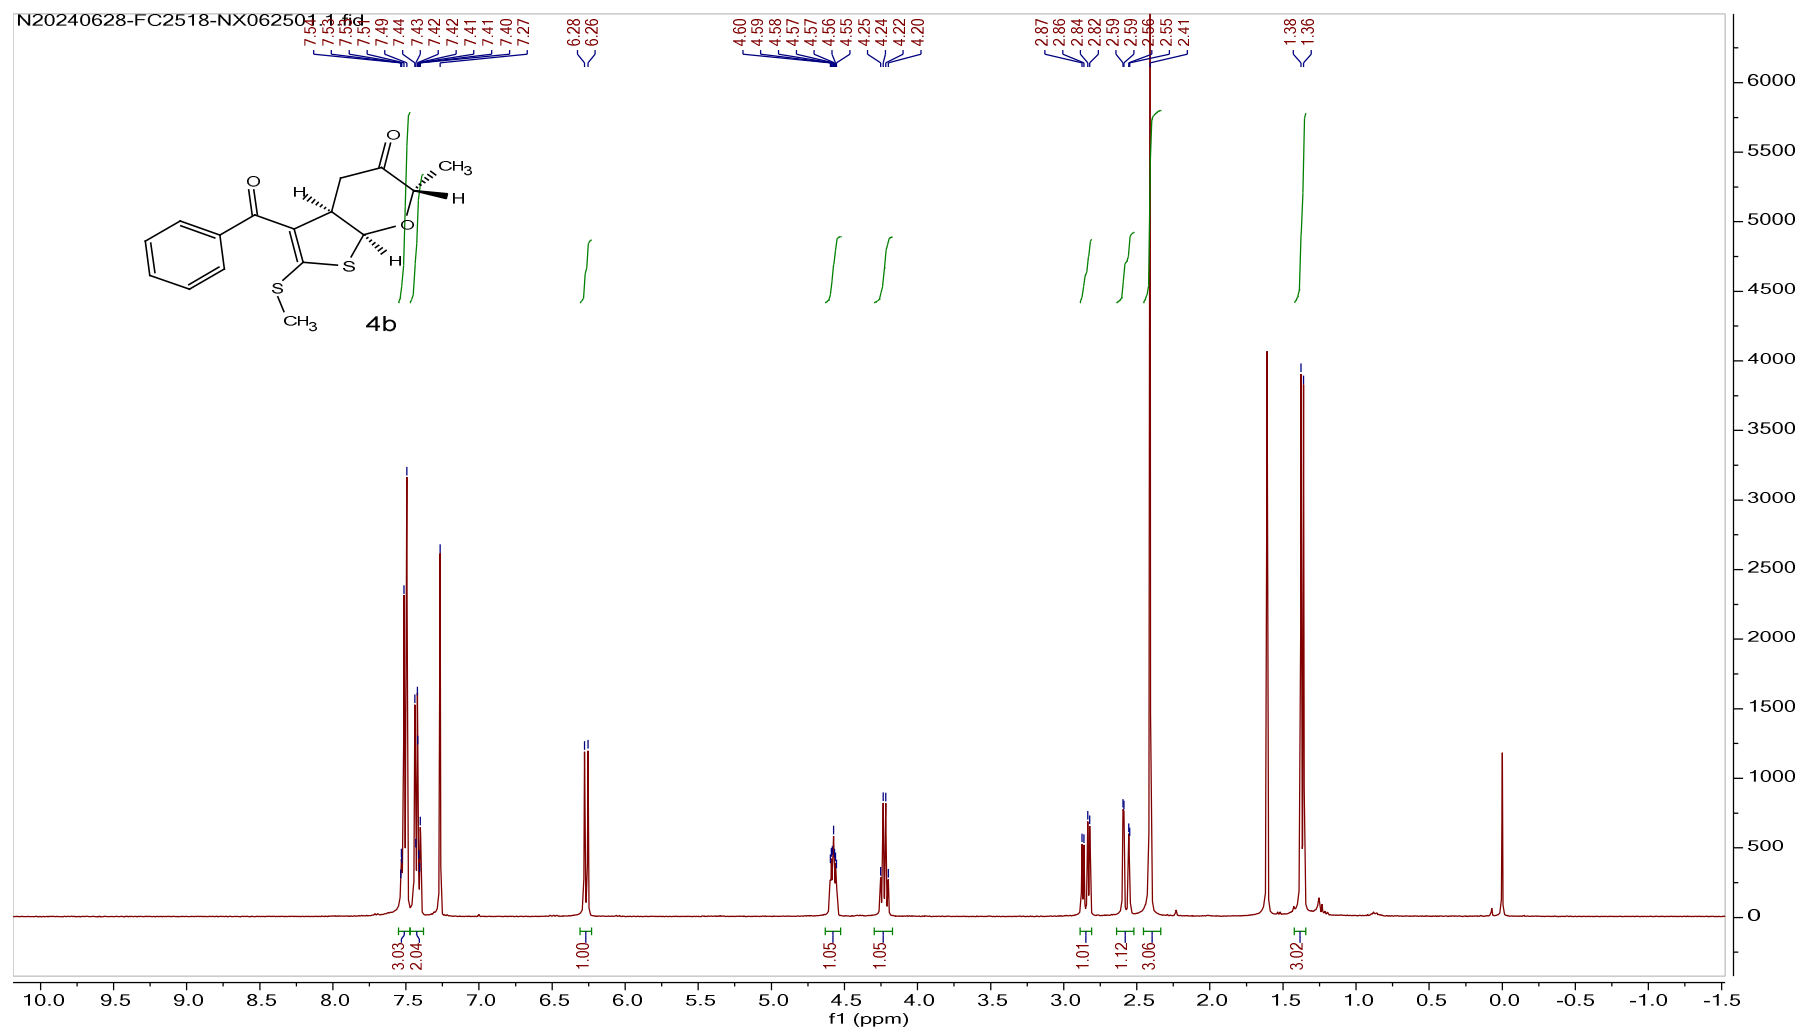

<sup>13</sup>C spectra **4b**.

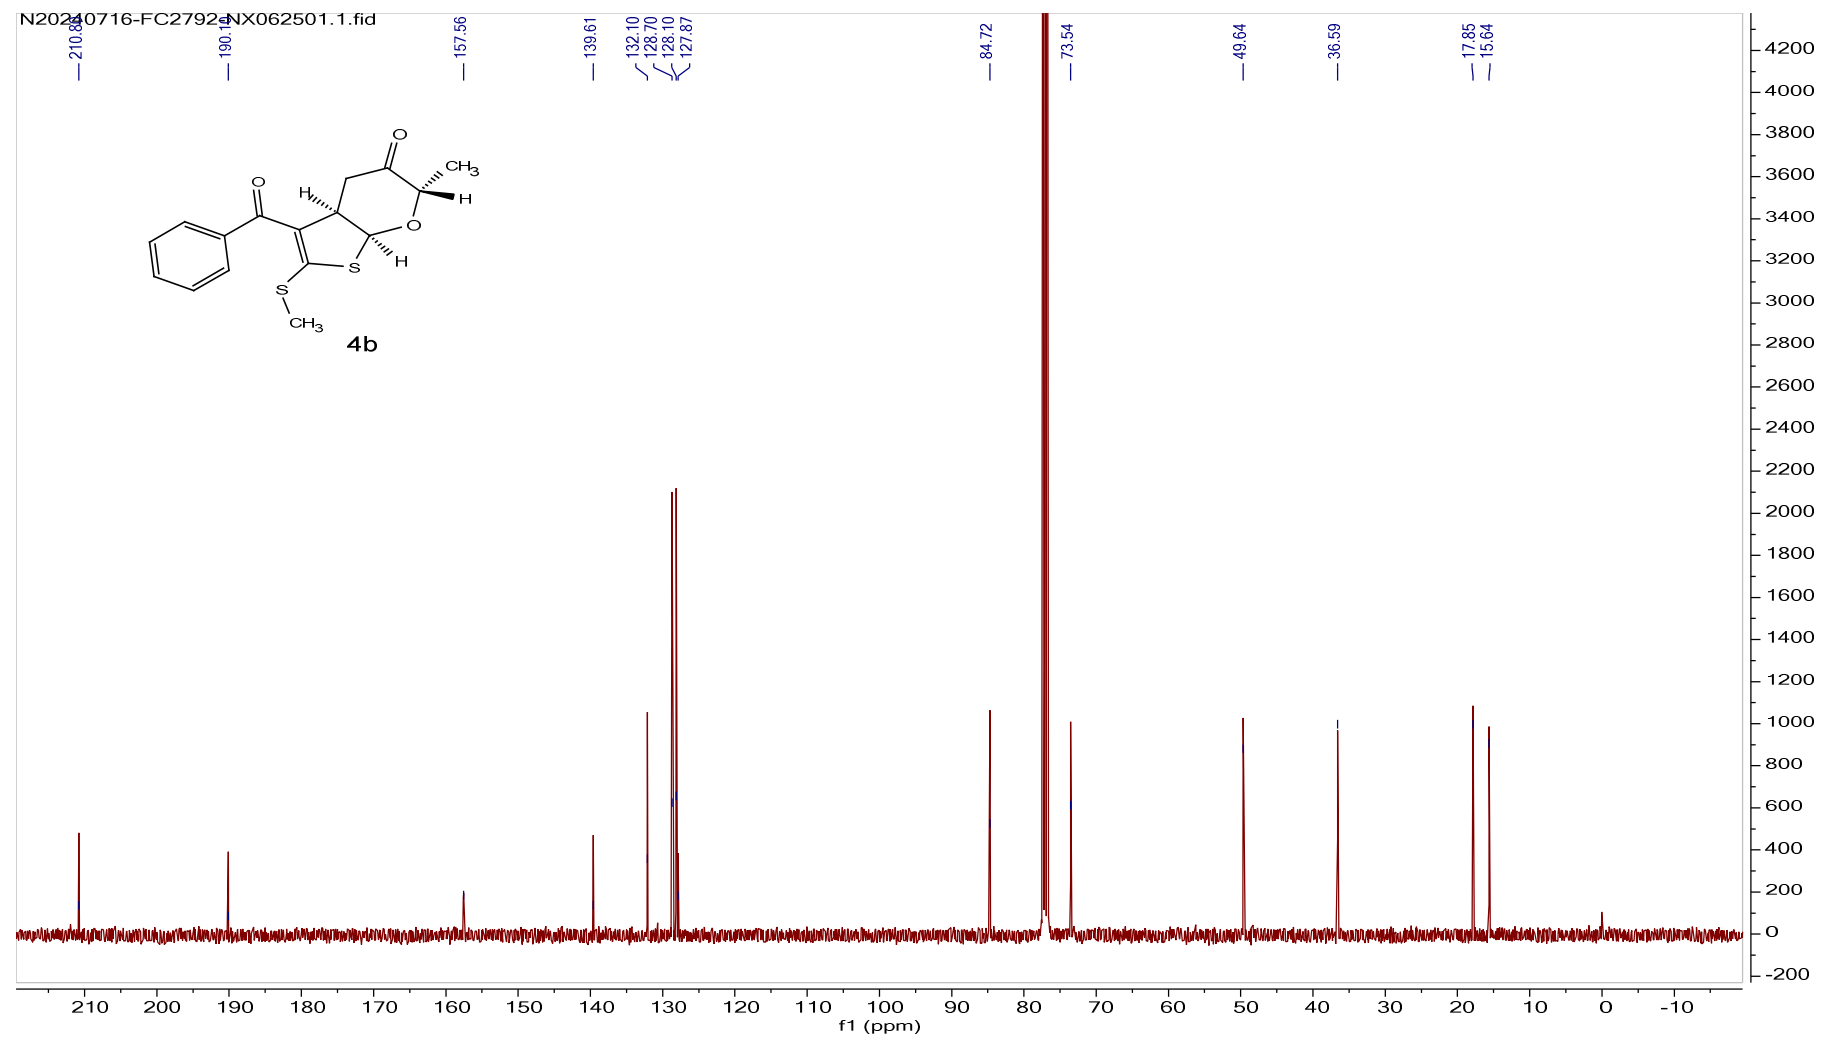

NOESY spectra of **4b**.

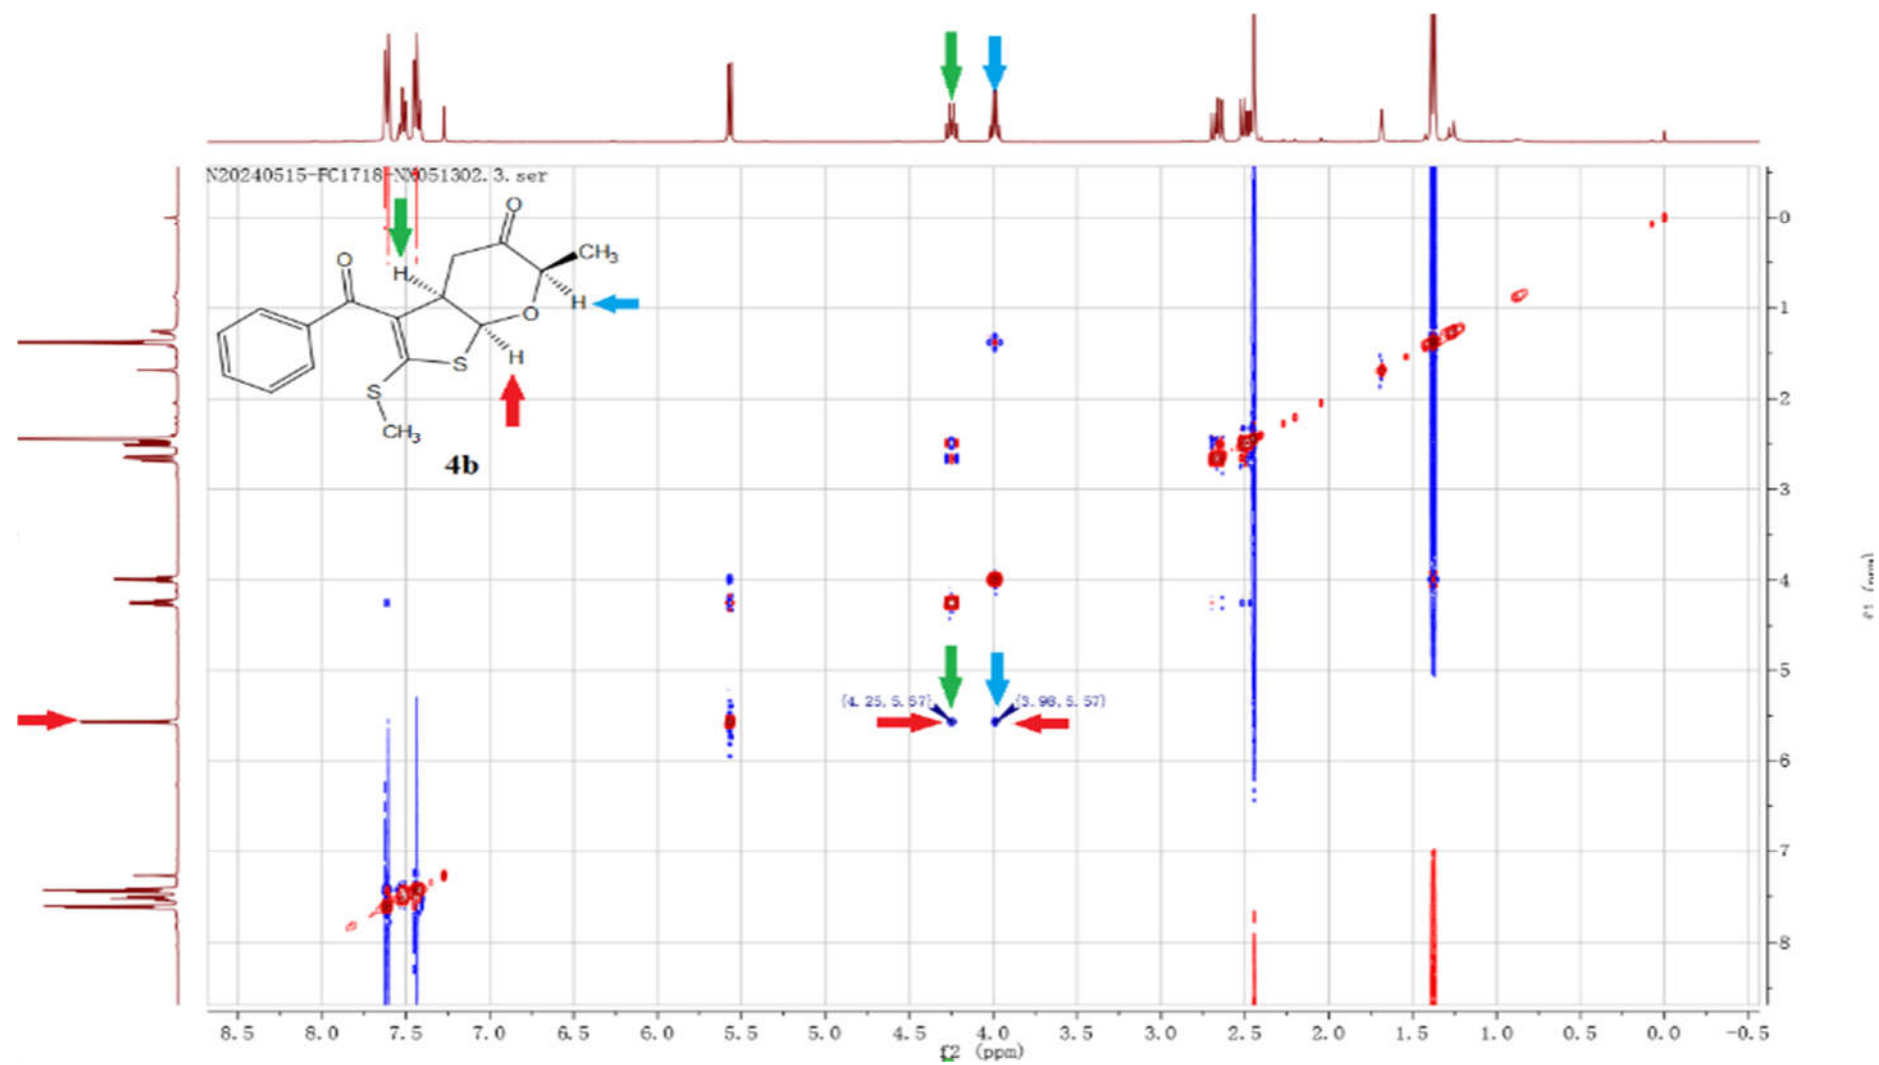

HRMS of 4b.

### Single Mass Analysis

Tolerance = 5.0 mDa / DBE: min = -1.5, max = 50.0

Element prediction: Off

Number of isotope peaks used for i-FIT = 3

Monoisotopic Mass, Even Electron Ions

2354 formula(e) evaluated with 1 results within limits (up to 50 best isotopic matches for each mass)

Elements Used:

C: 16-16 H: 16-16 N: 0-100 O: 0-100 Na: 0-4 S: 1-4

32

240910-5-647-1-4B 16 (0.121)

1: TOF MS ES+  
2.13e+006

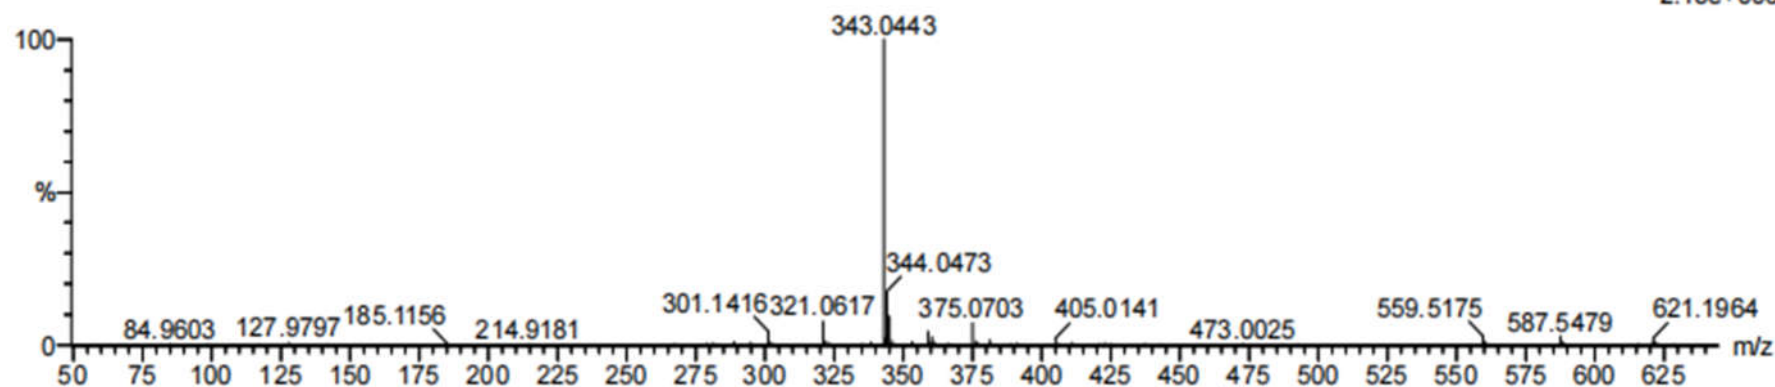

Minimum: -1.5  
Maximum: 5.0 10.0 50.0

| Mass     | Calc. Mass | mDa | PPM | DBE | i-FIT  | Norm | Conf (%) | Formula          |
|----------|------------|-----|-----|-----|--------|------|----------|------------------|
| 343.0443 | 343.0439   | 0.4 | 1.2 | 8.5 | 1088.2 | n/a  | n/a      | C16 H16 O3 Na S2 |

N20240716-FC2792-NX071404.1.fid

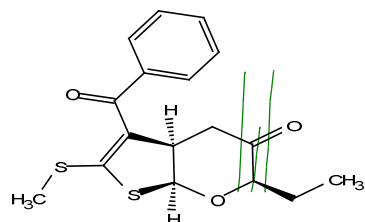

<sup>13</sup>C spectra 4c.

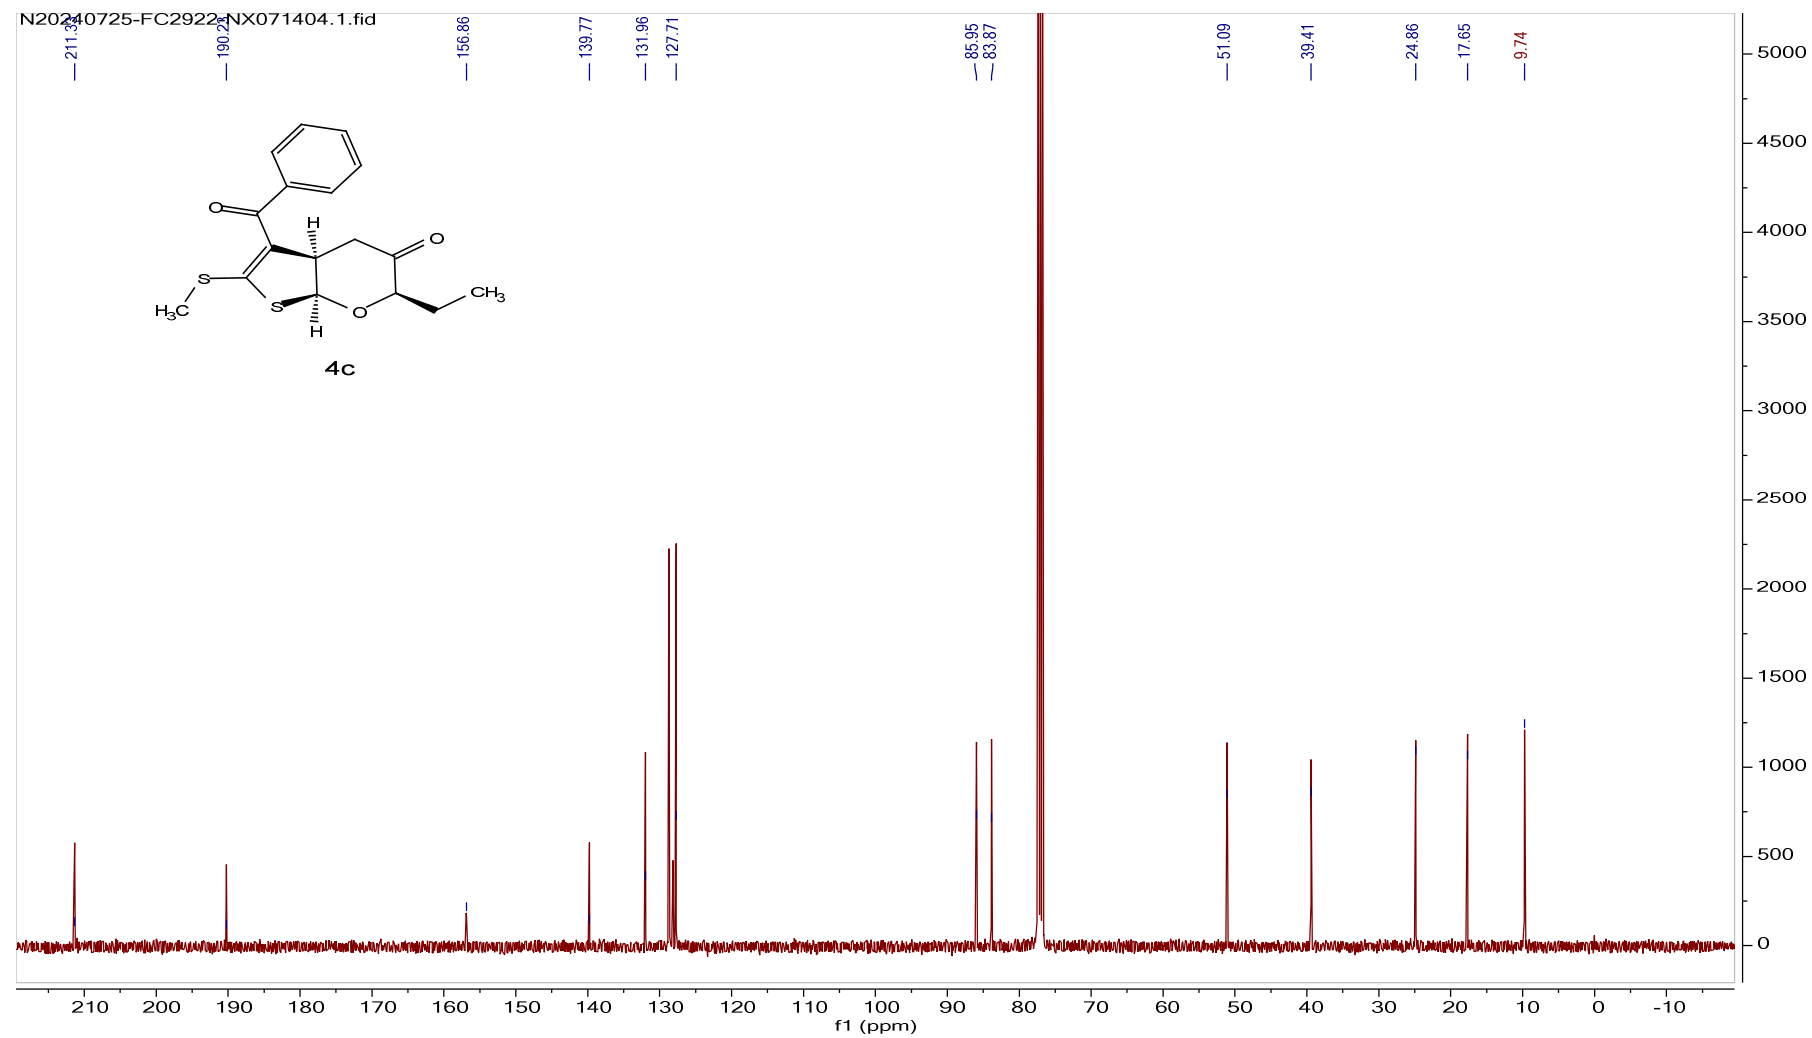



NOESY spectra of 4c.

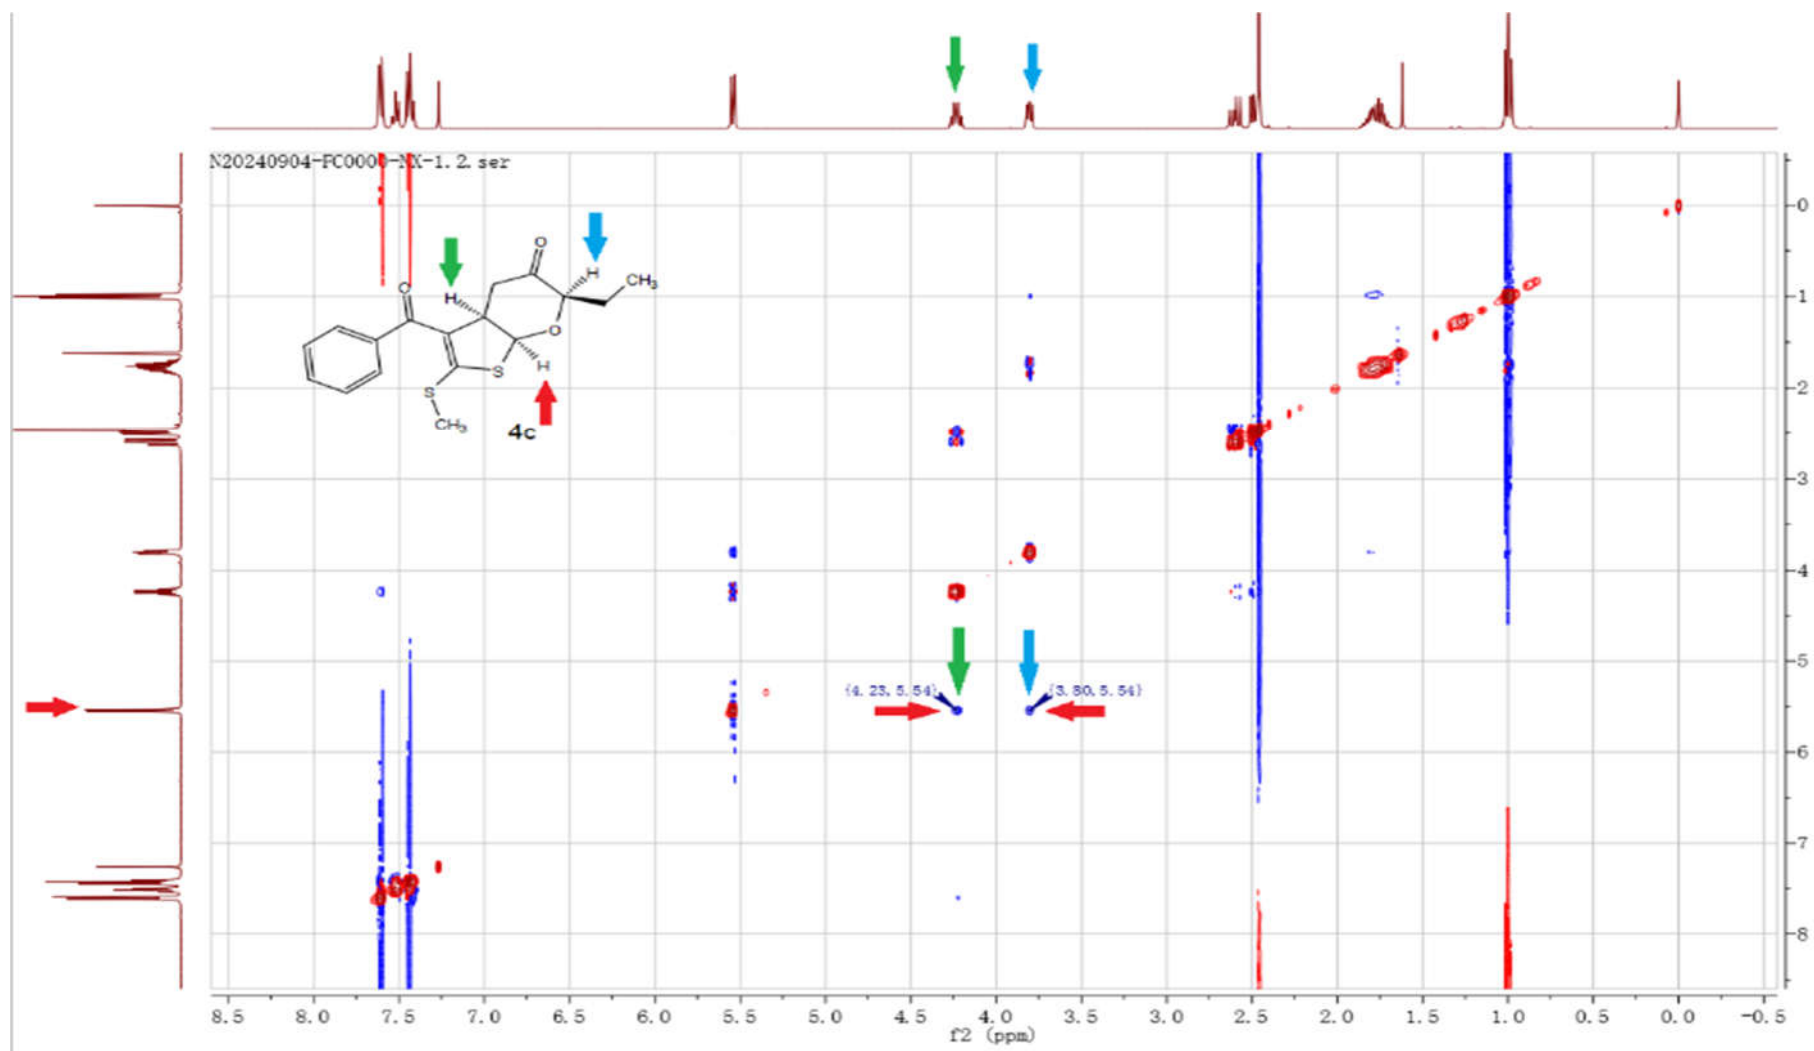

HRMS of 4c.

### Single Mass Analysis

Tolerance = 5.0 mDa / DBE: min = -1.5, max = 50.0

Element prediction: Off

Number of isotope peaks used for i-FIT = 3

Monoisotopic Mass, Even Electron Ions

2640 formula(e) evaluated with 1 results within limits (up to 50 best isotopic matches for each mass)

Elements Used:

C: 17-17 H: 18-18 N: 0-100 O: 0-100 Na: 0-4 S: 1-4

32

240910-5-647-1-4C 33 (0.229)

1: TOF MS ES+  
1.94e+005

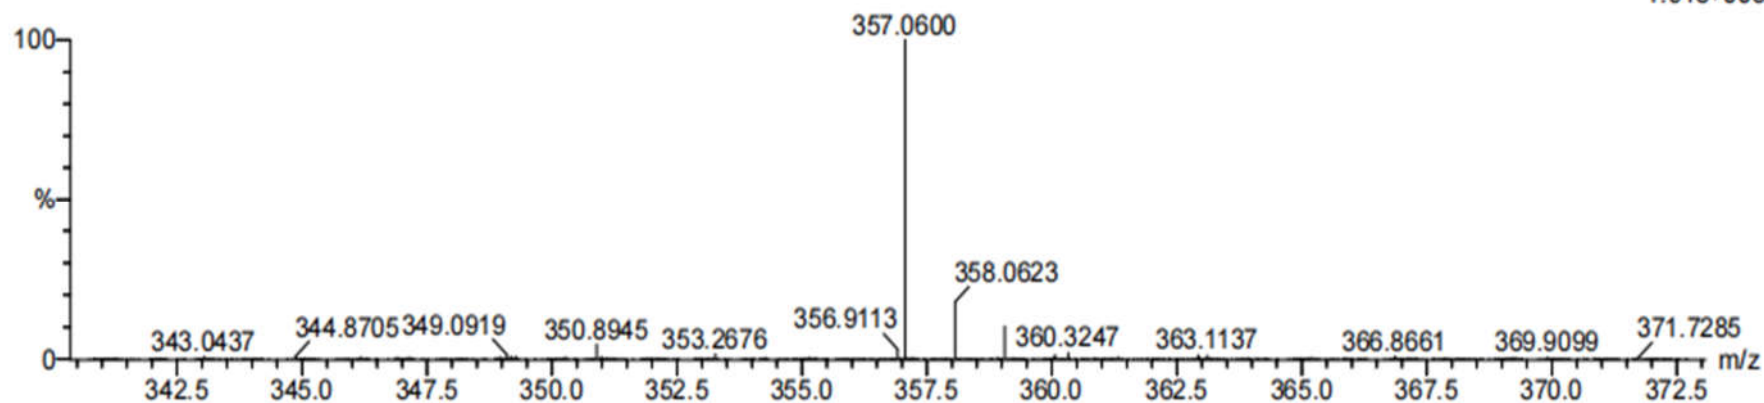

Minimum: -1.5

Maximum: 5.0 10.0 50.0

| Mass     | Calc. Mass | mDa | PPM | DBE | i-FIT | Norm | Conf(%) | Formula          |
|----------|------------|-----|-----|-----|-------|------|---------|------------------|
| 357.0600 | 357.0595   | 0.5 | 1.4 | 8.5 | 698.9 | n/a  | n/a     | C17 H18 O3 Na S2 |

<sup>1</sup>H spectra of 4d.

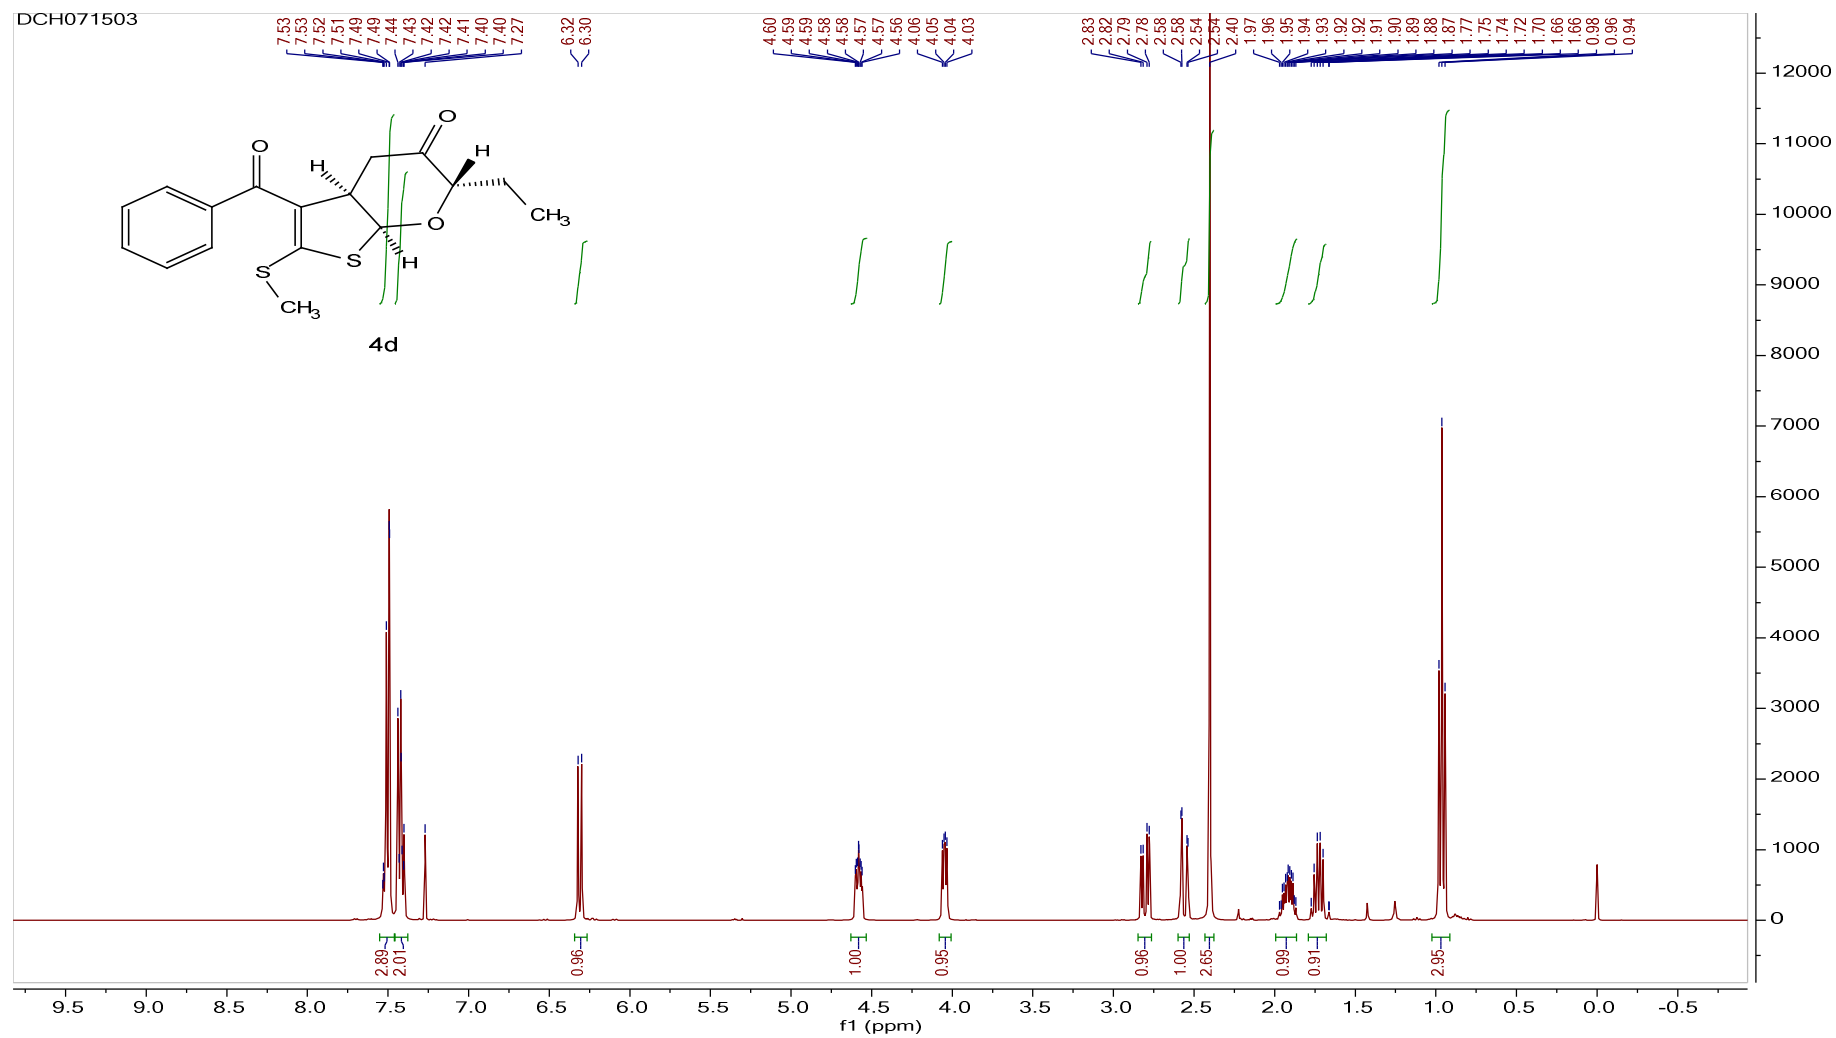

<sup>13</sup>C spectra of **4d**.

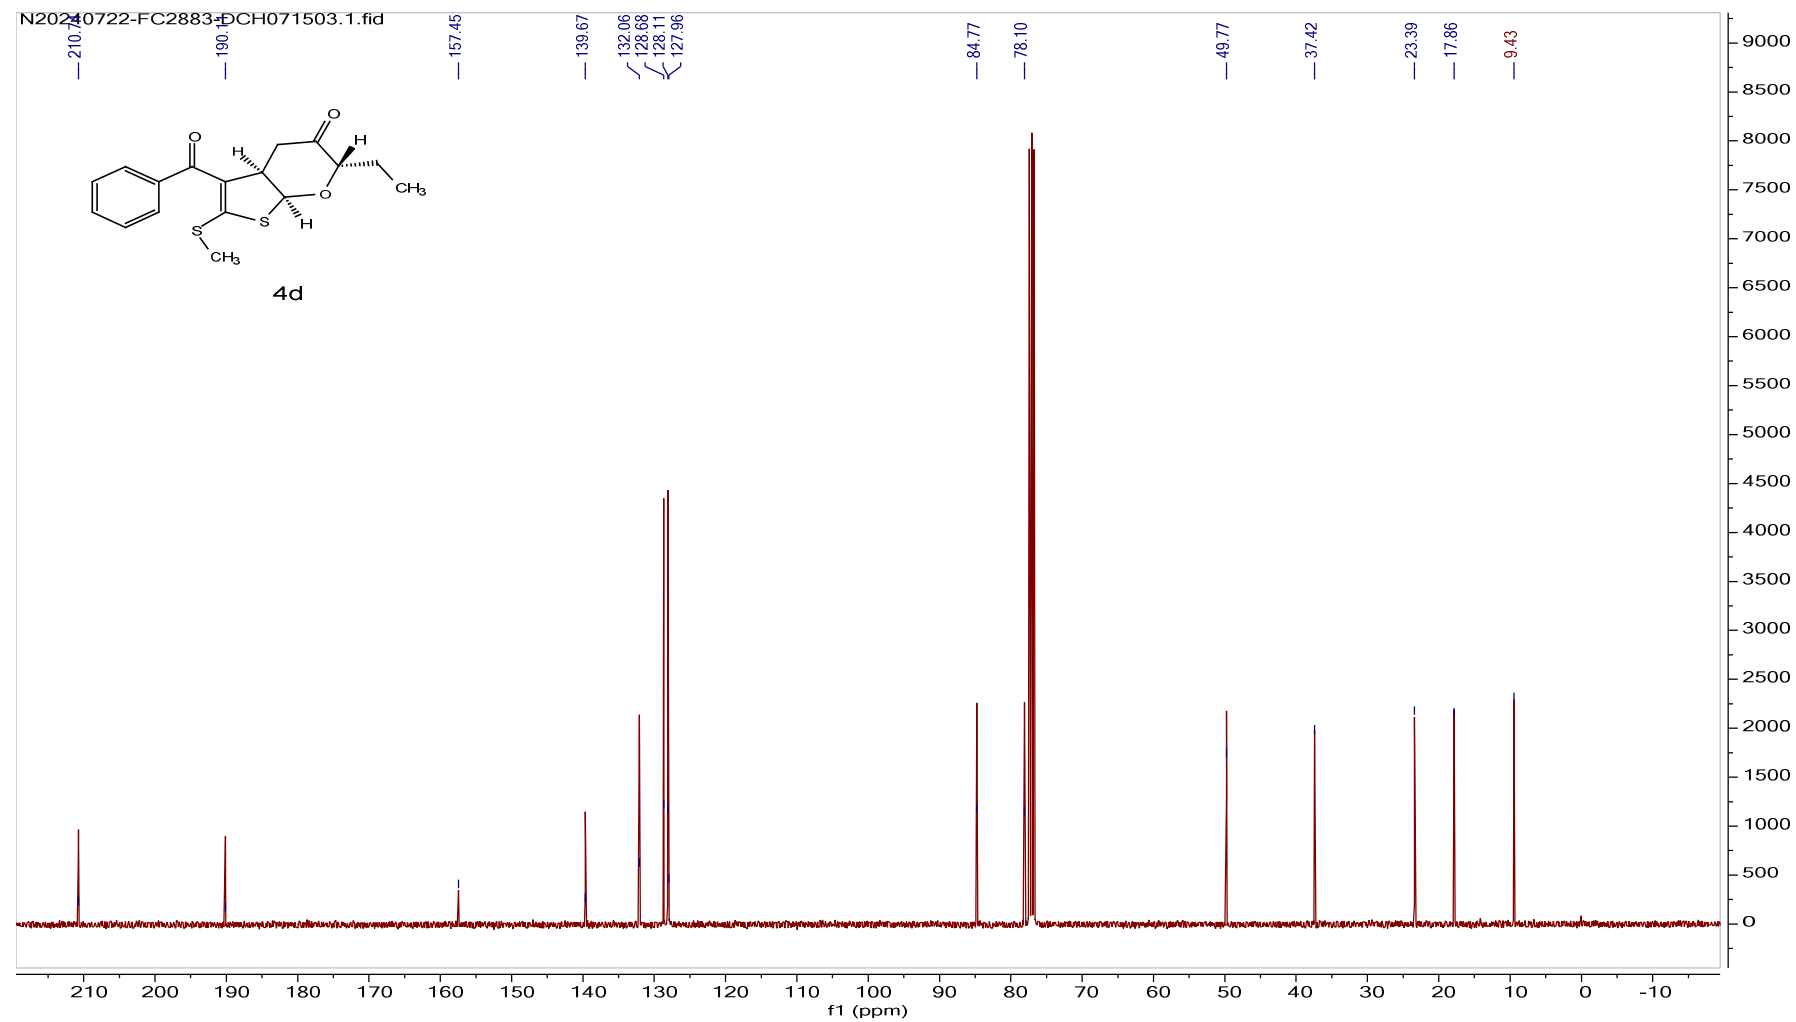

NOESY spectra of **4d**.

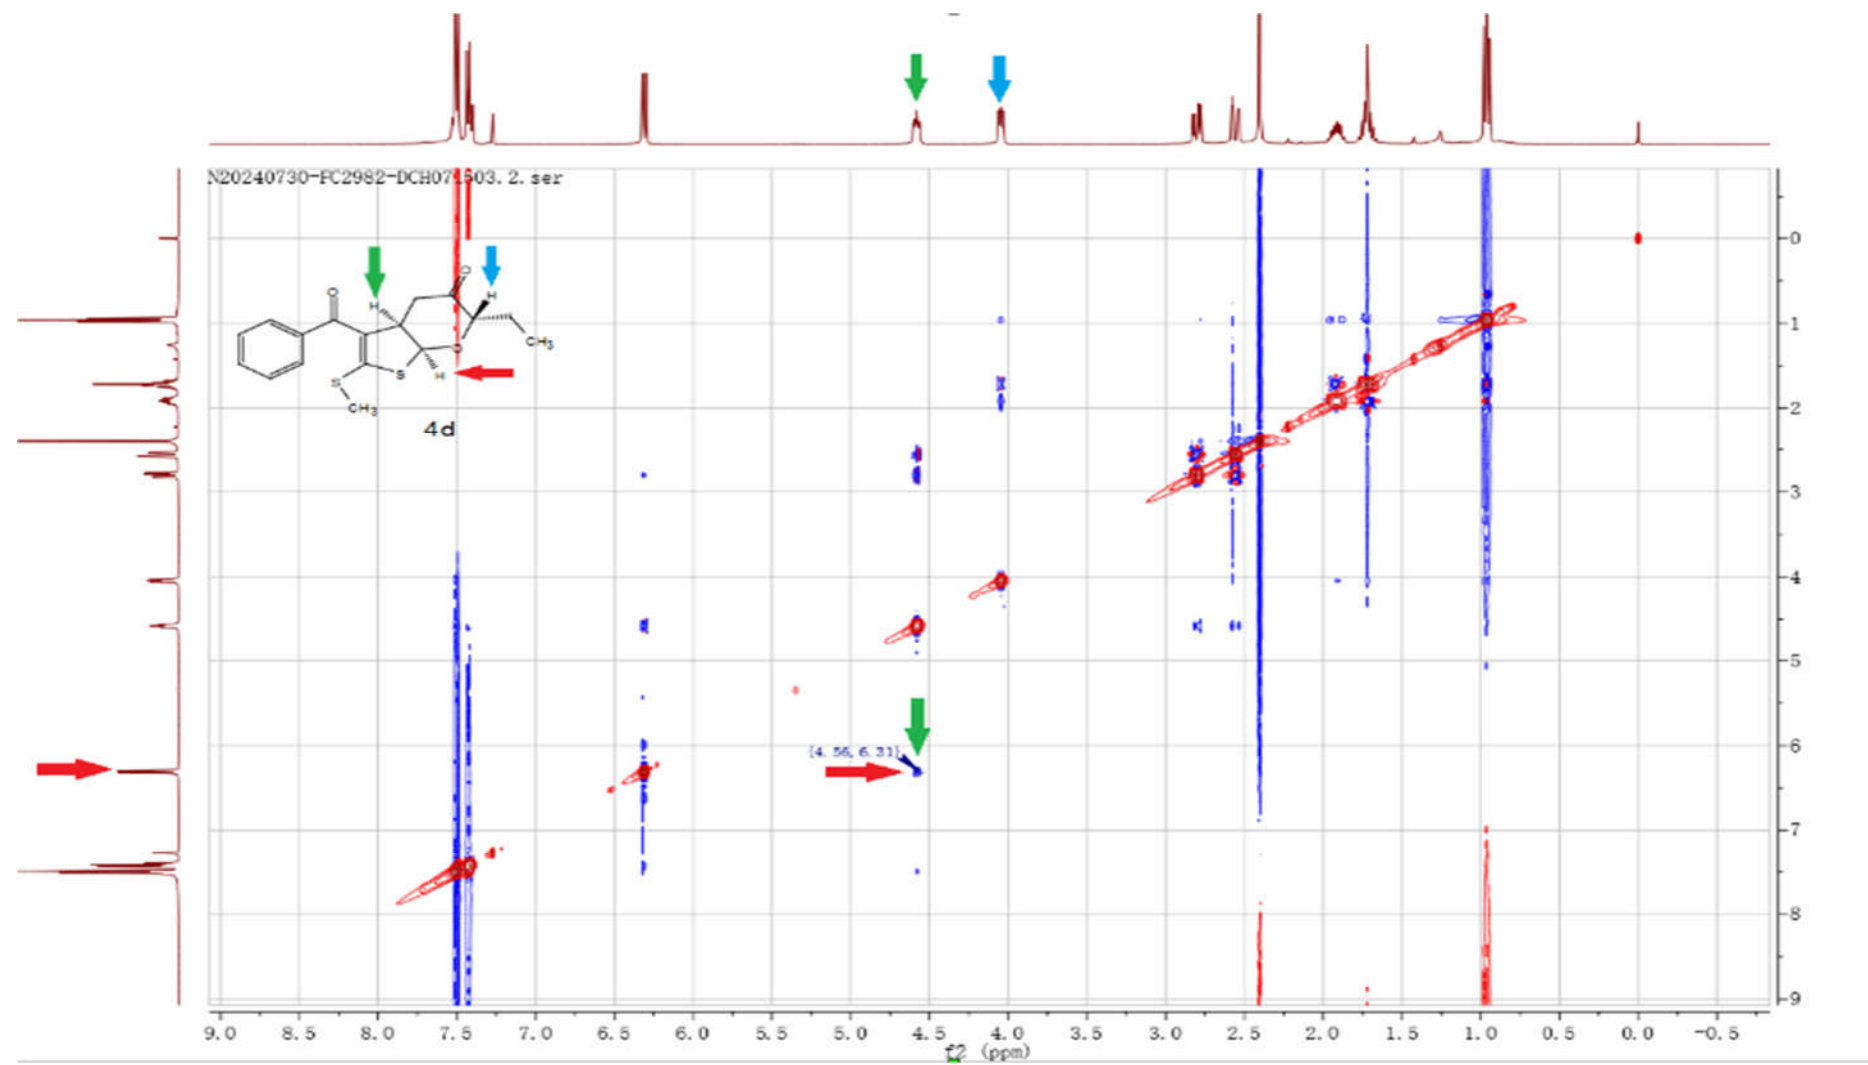

HRMS of 4d.

### Single Mass Analysis

Tolerance = 5.0 mDa / DBE: min = -1.5, max = 50.0

Element prediction: Off

Number of isotope peaks used for i-FIT = 3

Monoisotopic Mass, Even Electron Ions

2640 formula(e) evaluated with 1 results within limits (up to 50 best isotopic matches for each mass)

Elements Used:

C: 17-17 H: 18-18 N: 0-100 O: 0-100 Na: 0-4 S: 1-4

32

240910-5-647-1-4D 19 (0.136)

1: TOF MSES+  
1.20e+006

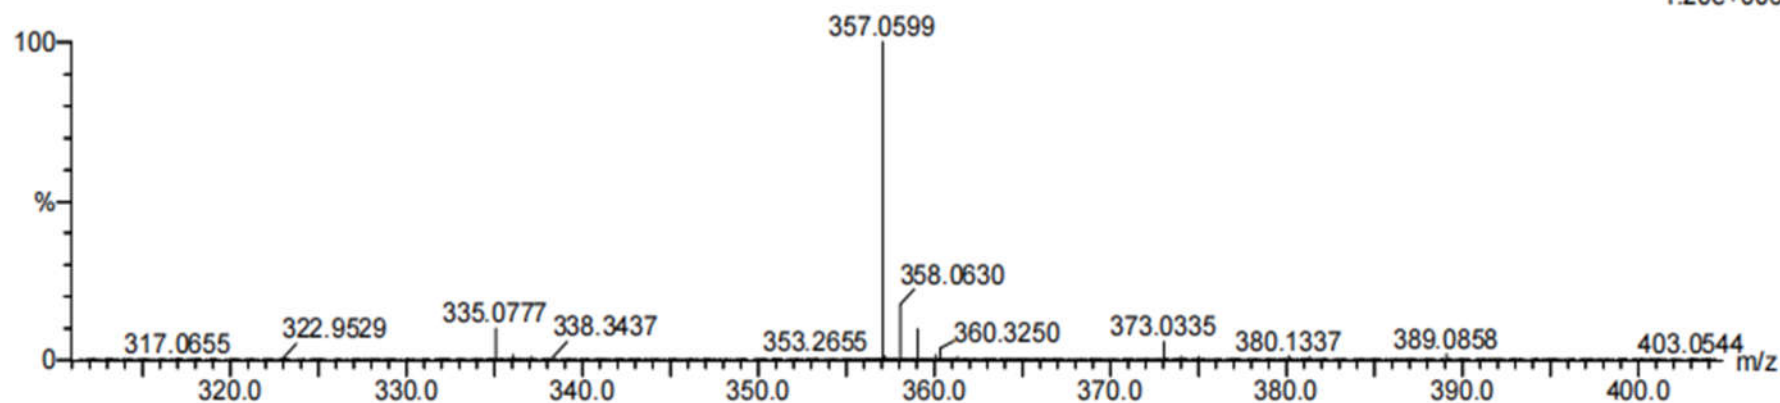

Minimum: -1.5  
Maximum: 5.0 10.0 50.0

| Mass     | Calc. Mass | mDa | PPM | DBE | i-FIT | Norm | Conf(%) | Formula          |
|----------|------------|-----|-----|-----|-------|------|---------|------------------|
| 357.0599 | 357.0595   | 0.4 | 1.1 | 8.5 | 961.4 | n/a  | n/a     | C17 H18 O3 Na S2 |

<sup>1</sup>H spectra of **4e**.

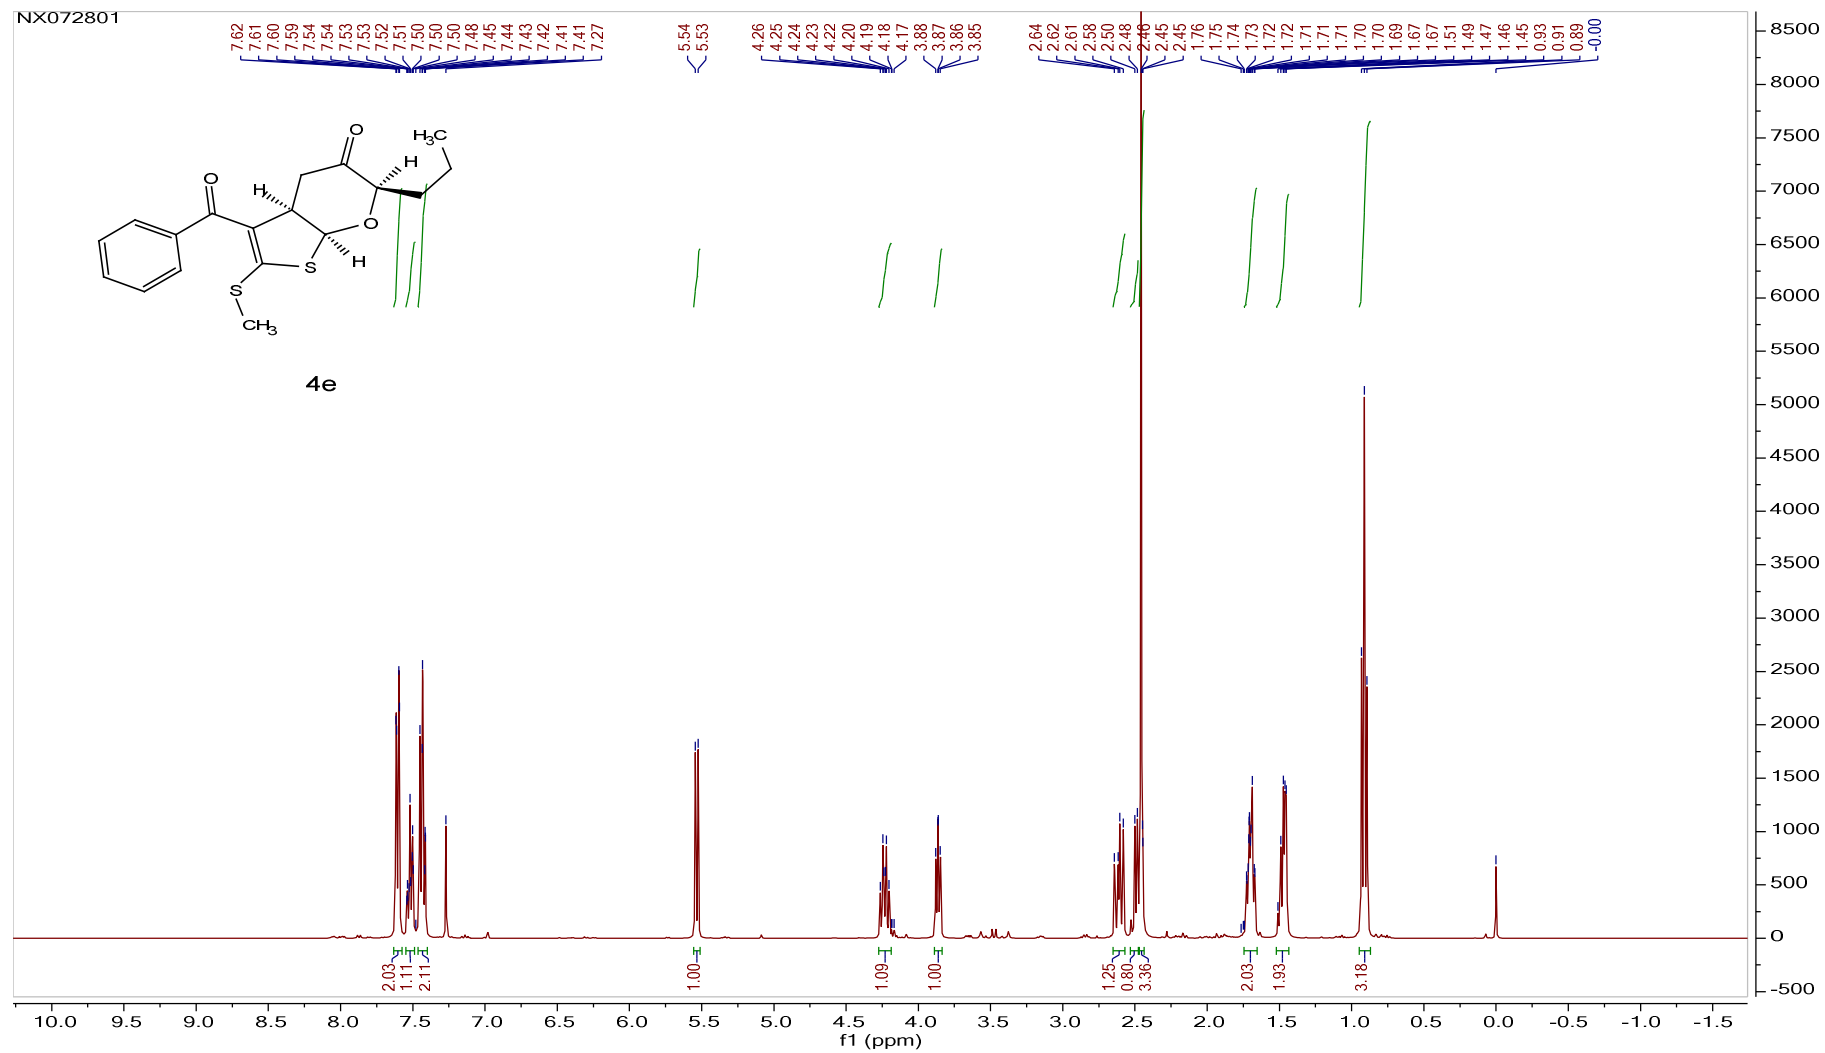

<sup>13</sup>C spectra of **4e**.

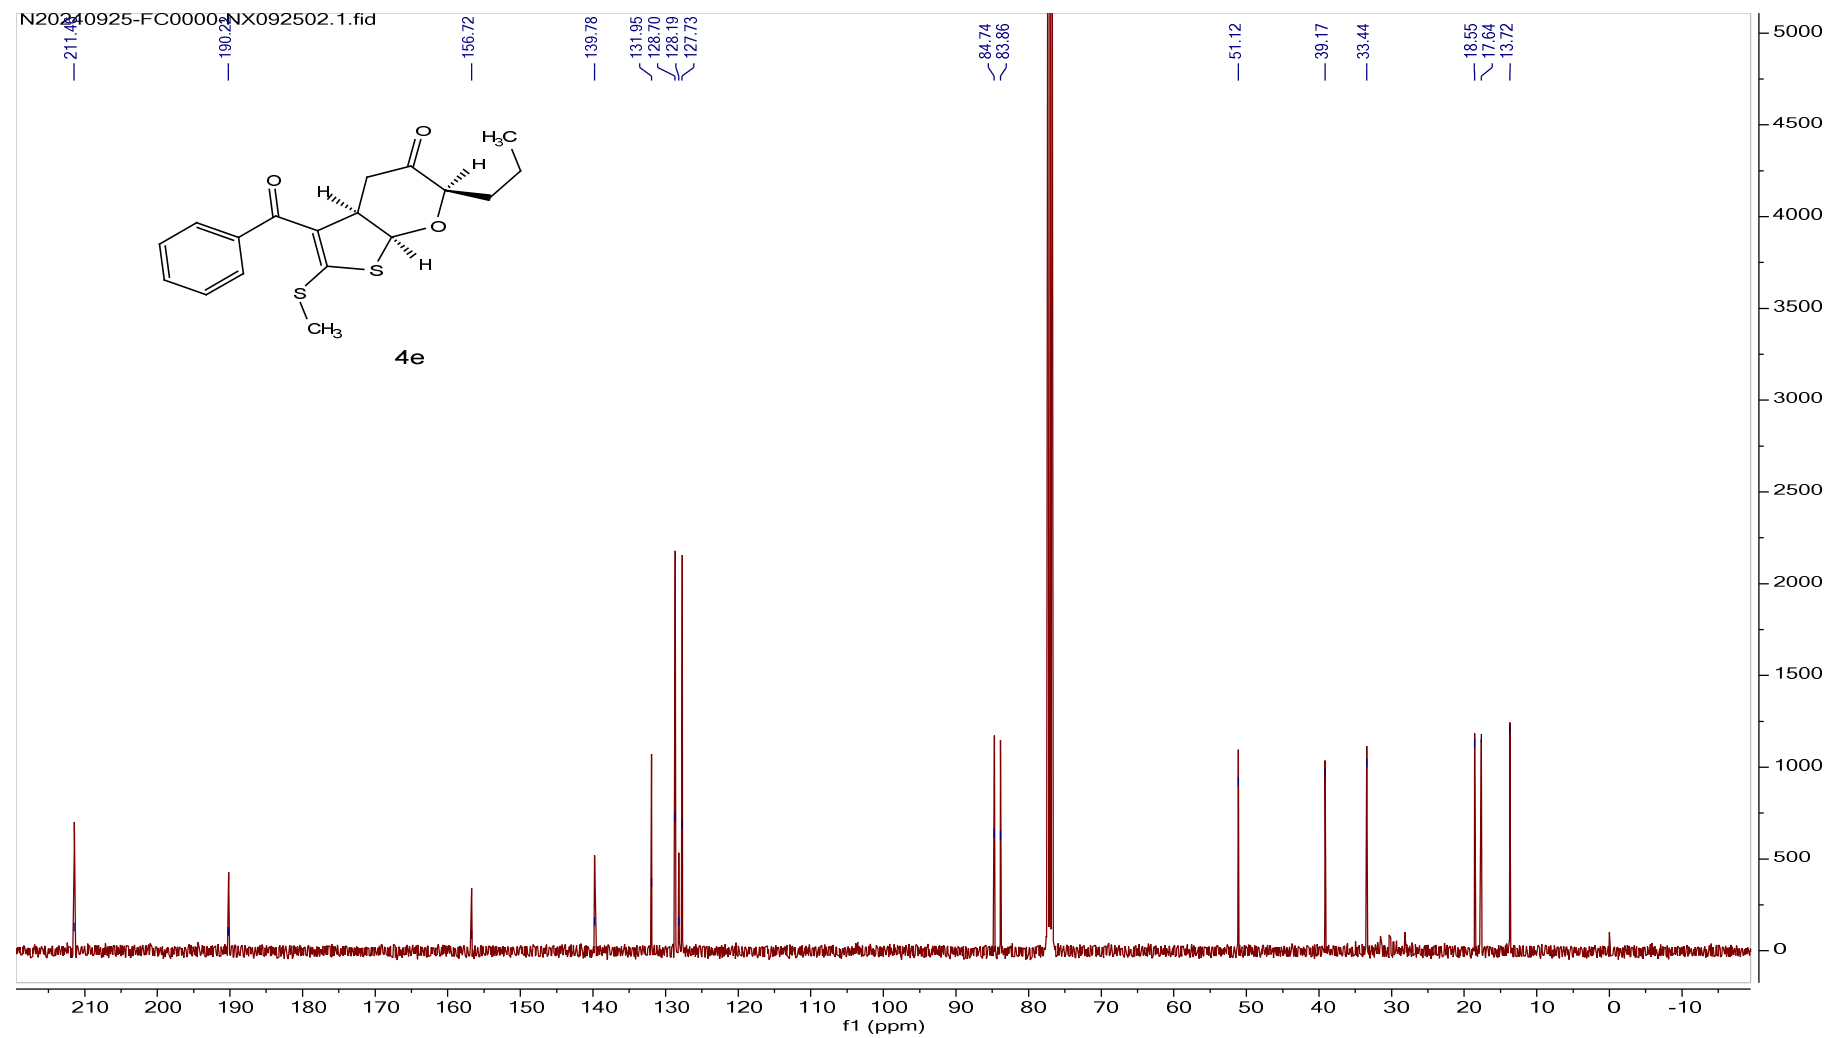



NOESY spectra of 4e.

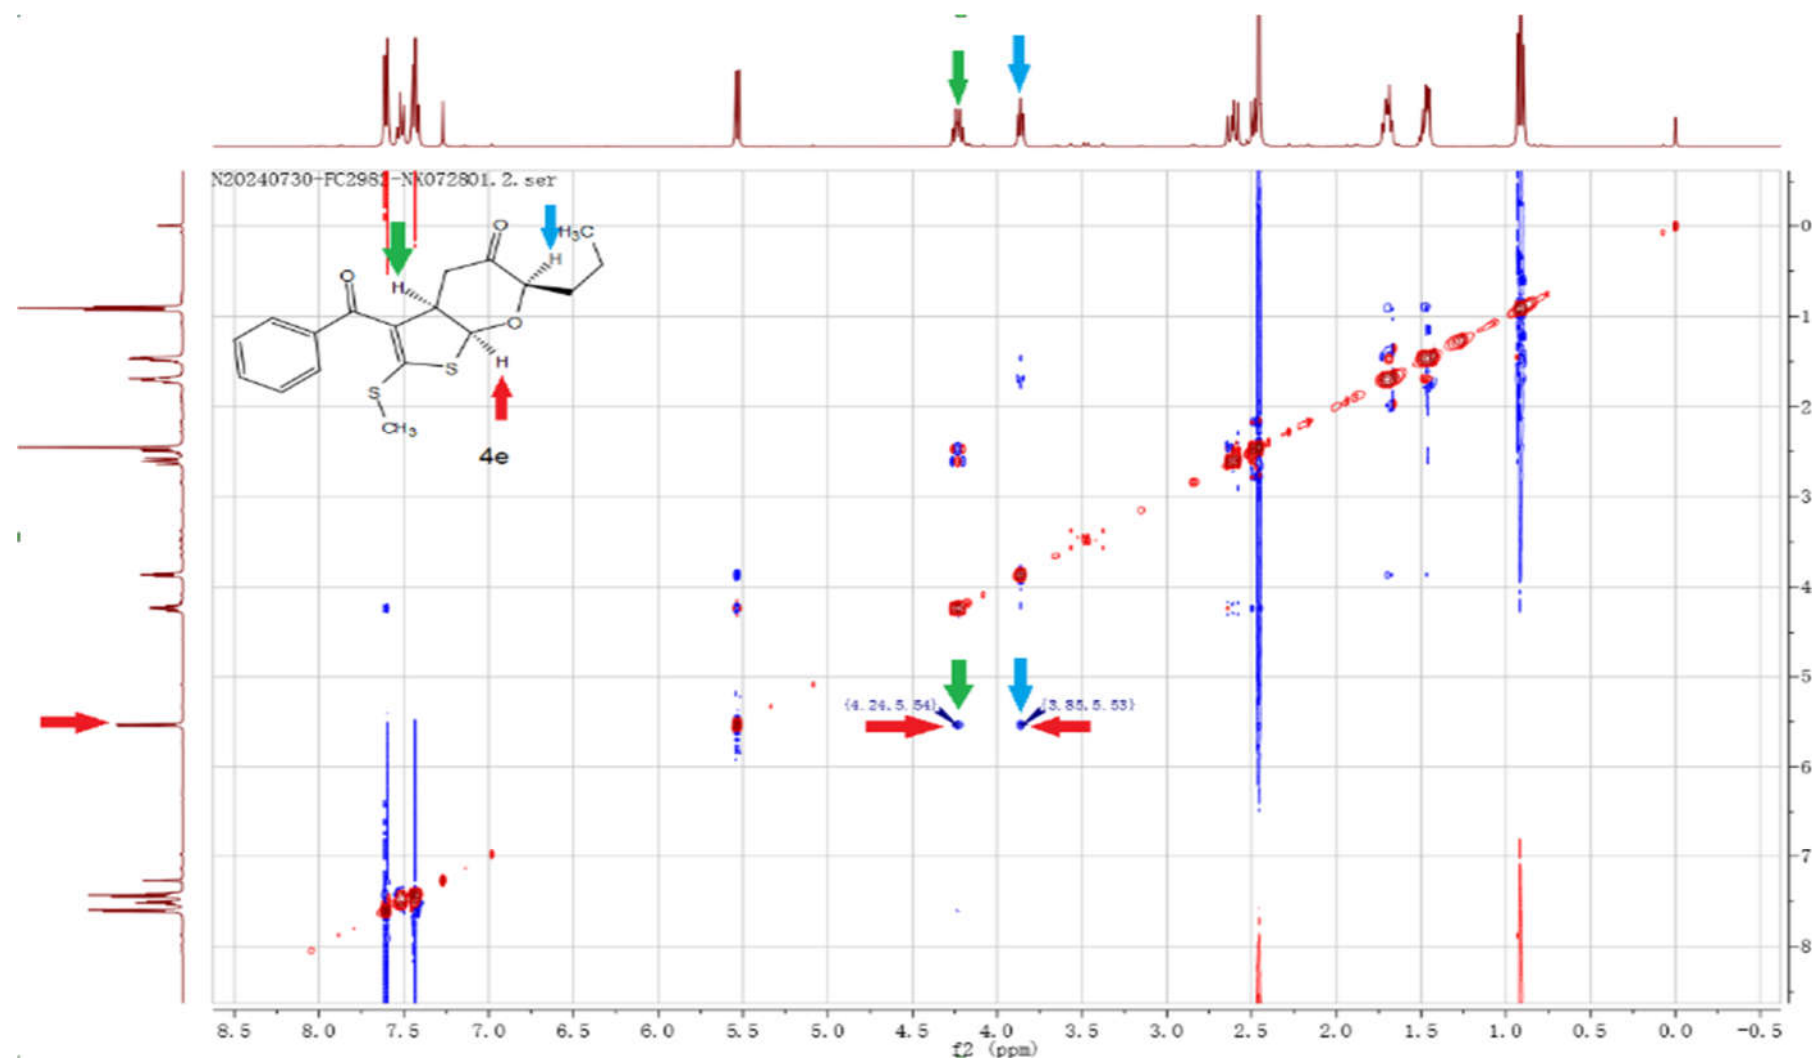

HRMS of 4e.

### Single Mass Analysis

Tolerance = 5.0 mDa / DBE: min = -1.5, max = 50.0

Element prediction: Off

Number of isotope peaks used for i-FIT = 3

Monoisotopic Mass, Even Electron Ions

2943 formula(e) evaluated with 1 results within limits (up to 50 best isotopic matches for each mass)

Elements Used:

C: 18-18 H: 20-20 N: 0-100 O: 0-100 Na: 0-4 S: 1-4

32

240910-5-647-1-4E 25 (0.168)

1: TOF MS ES+  
1.31e+006

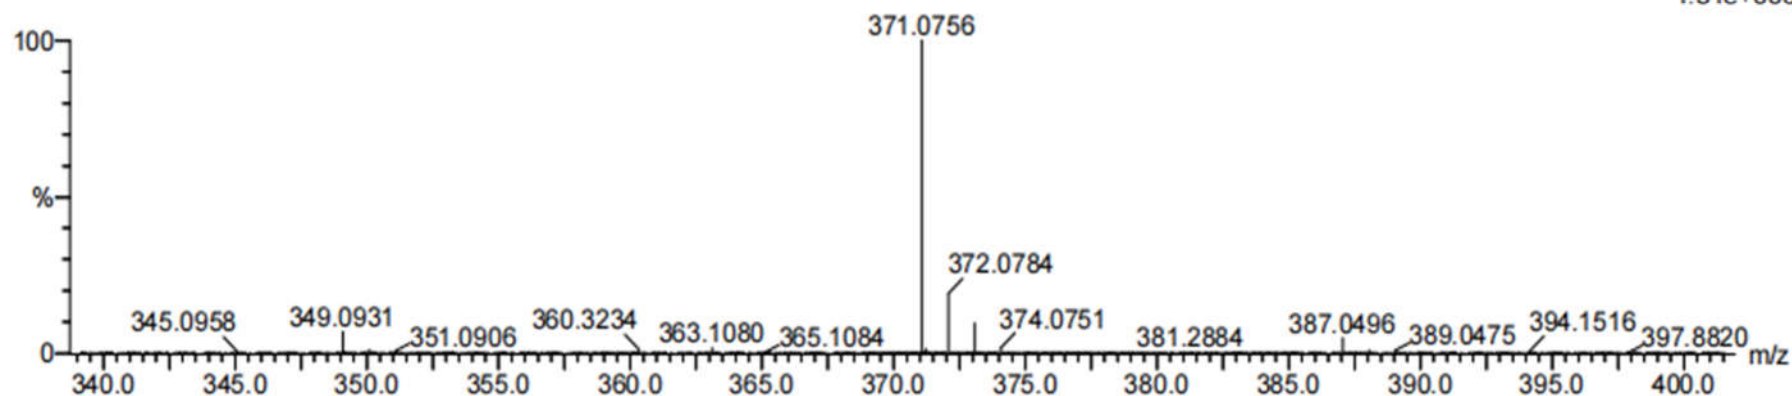

Minimum: -1.5  
Maximum: 5.0 10.0 50.0

| Mass     | Calc. Mass | mDa | PPM | DBE | i-FIT | Norm | Conf(%) | Formula          |
|----------|------------|-----|-----|-----|-------|------|---------|------------------|
| 371.0756 | 371.0752   | 0.4 | 1.1 | 8.5 | 963.9 | n/a  | n/a     | C18 H20 O3 Na S2 |

<sup>1</sup>H spectra of 4f.

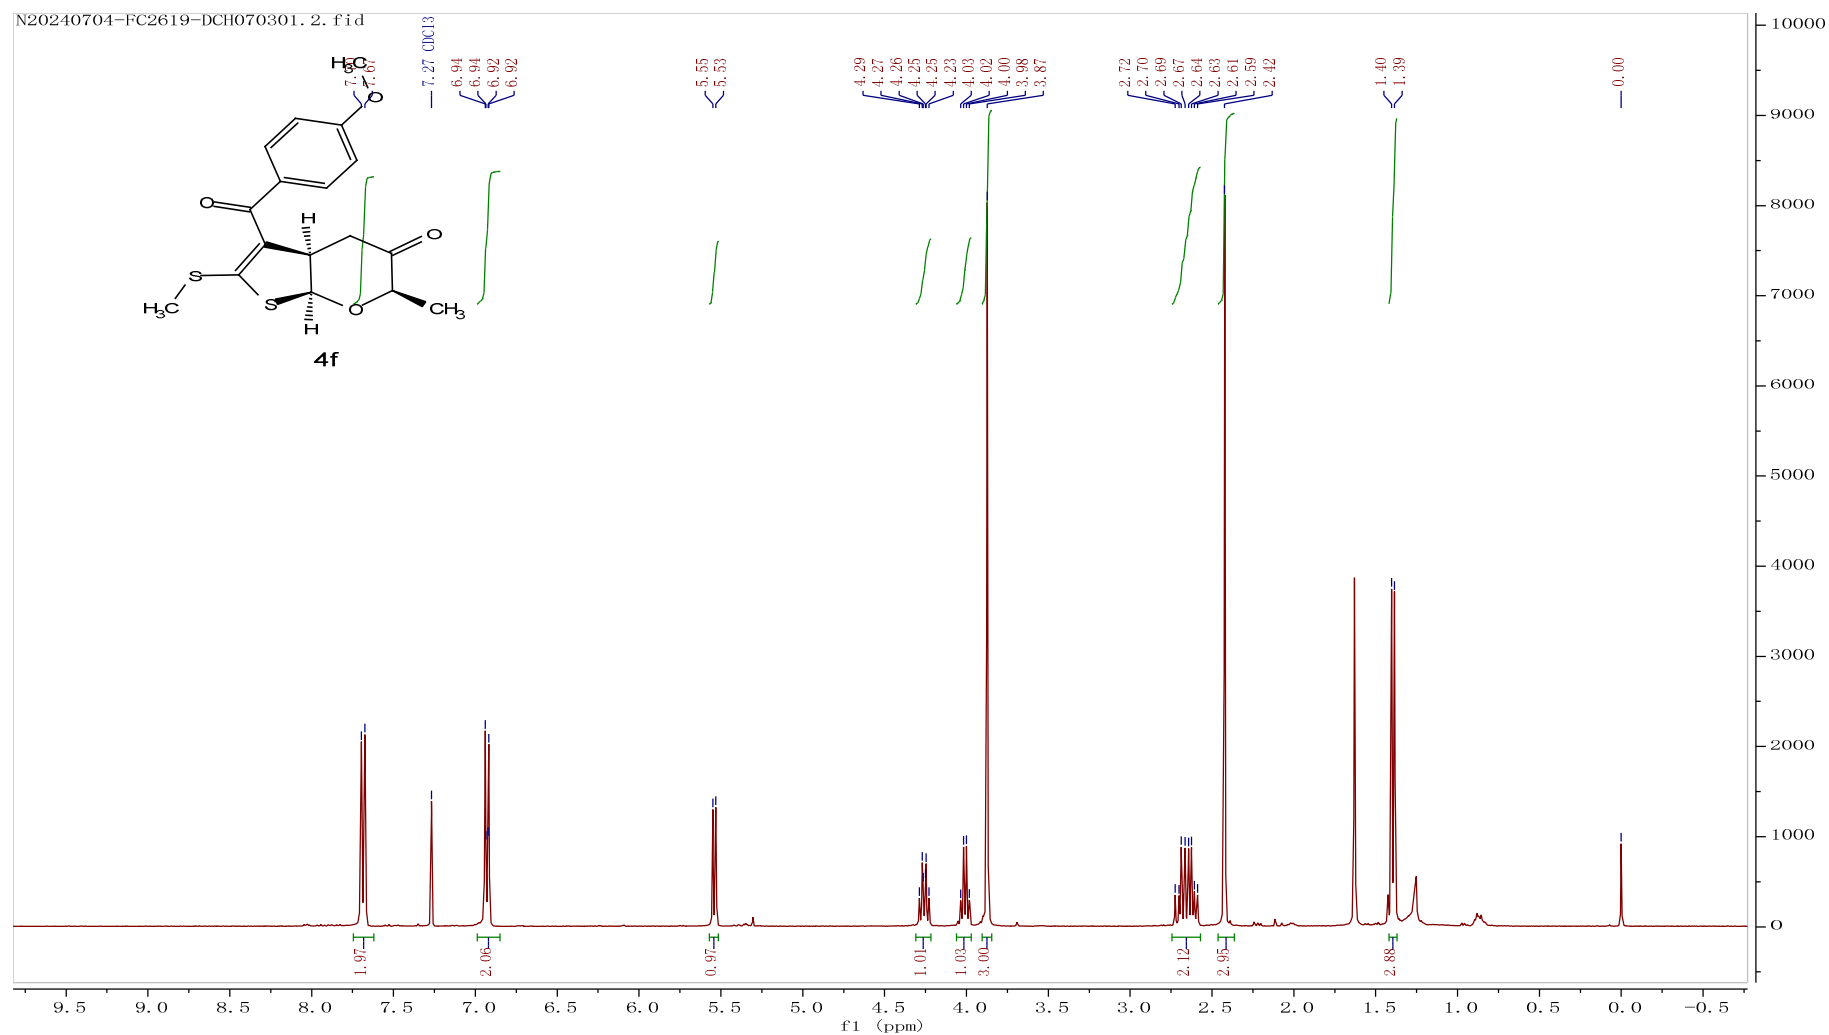

<sup>13</sup>C spectra of 4f.

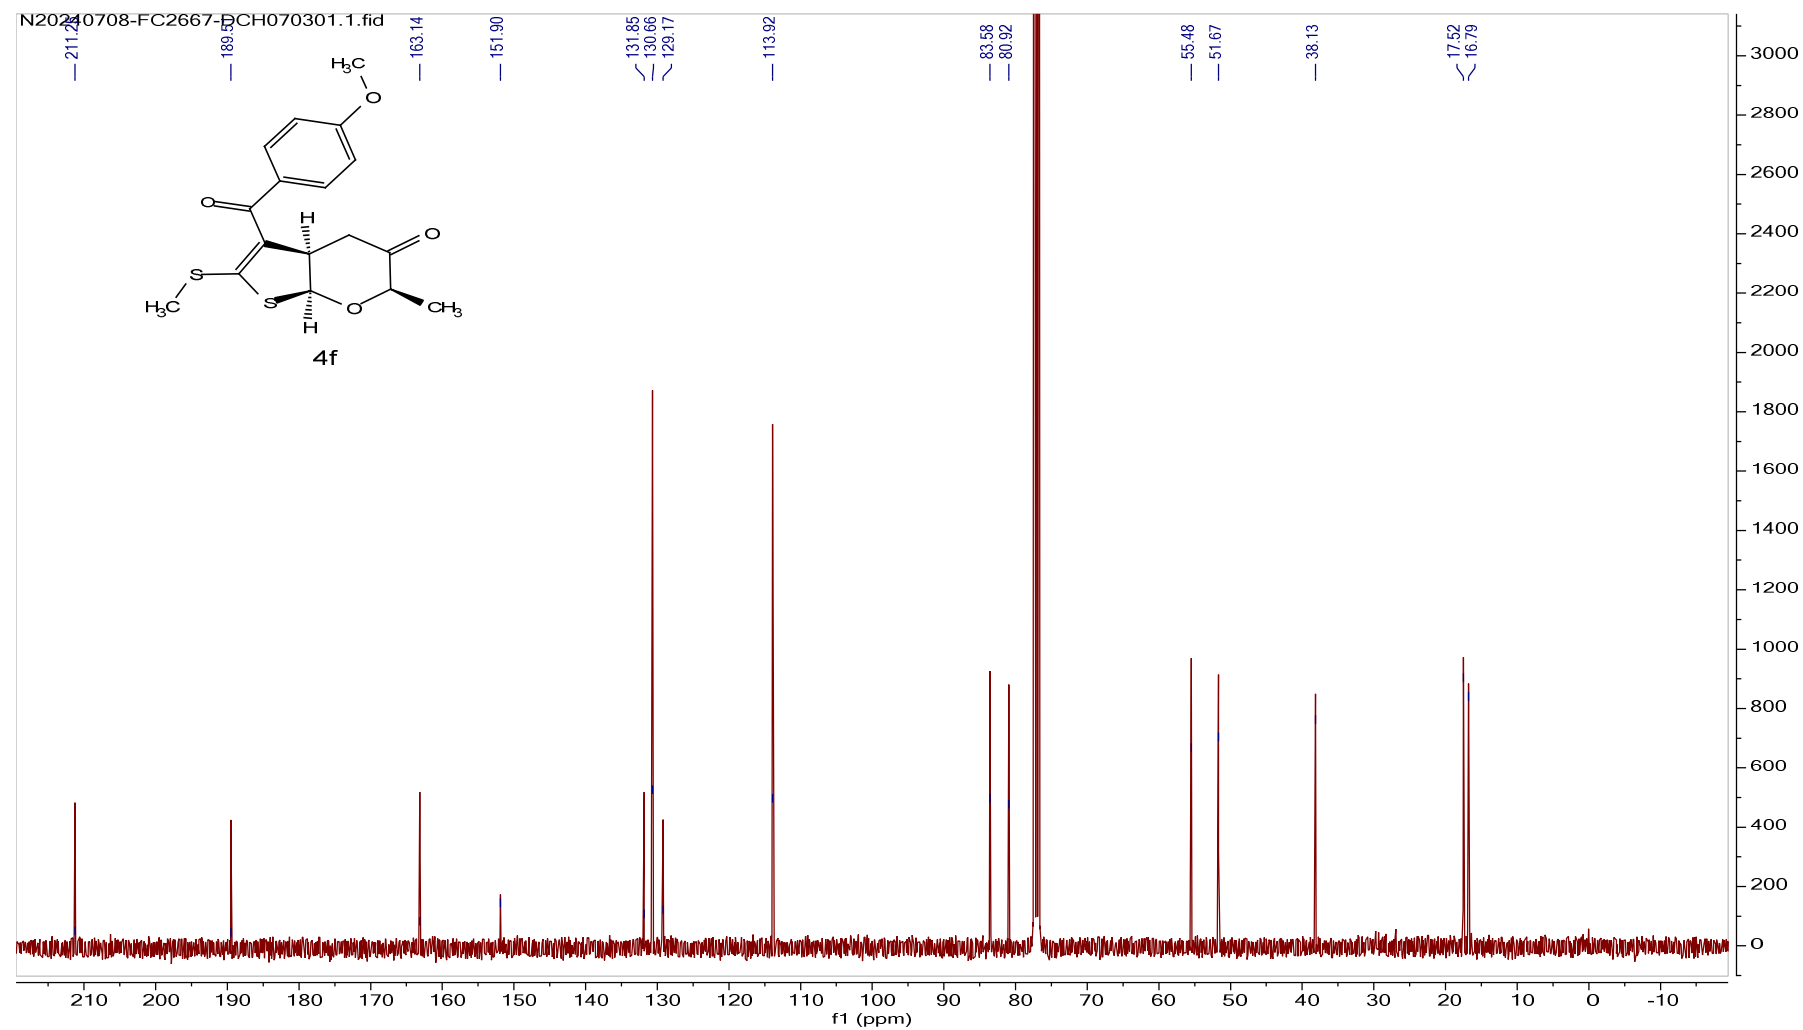

HRMS of 4f.

### Single Mass Analysis

Tolerance = 5.0 mDa / DBE: min = -1.5, max = 50.0

Element prediction: Off

Number of isotope peaks used for i-FIT = 3

Monoisotopic Mass, Even Electron Ions

2940 formula(e) evaluated with 1 results within limits (up to 50 best isotopic matches for each mass)

Elements Used:

C: 17-17 H: 18-18 N: 0-100 O: 0-100 Na: 0-4 S: 1-4

29

240910-5-647-1-4F 10 (0.089)

1: TOF MS ES+  
1.72e+006

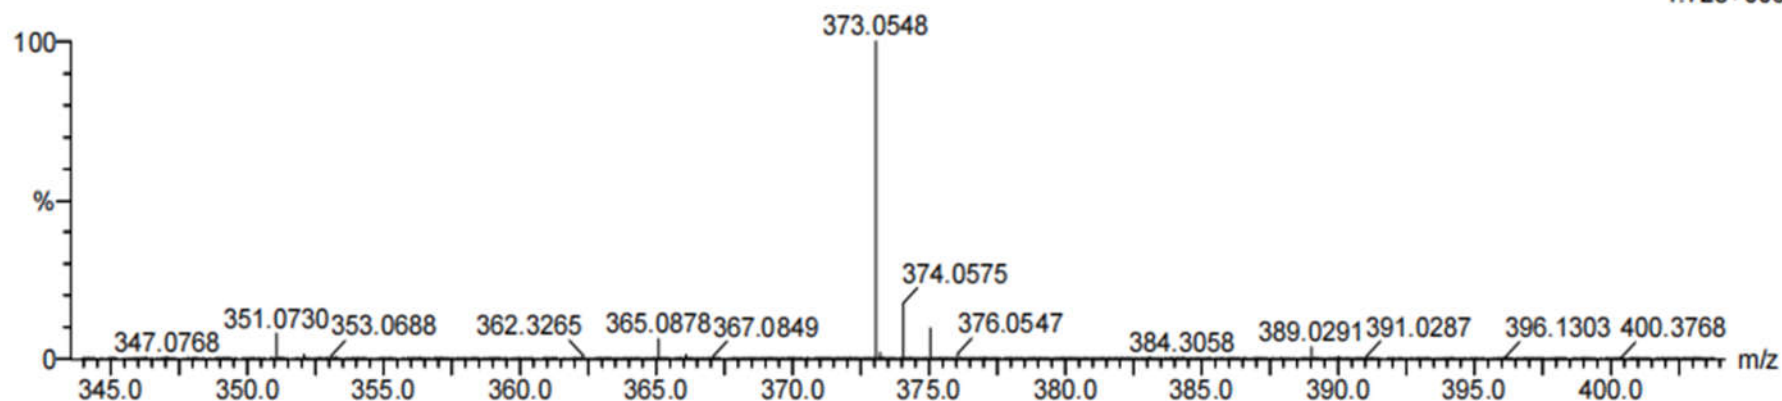

Minimum: -1.5  
Maximum: 5.0 10.0 50.0

| Mass     | Calc. Mass | mDa | PPM | DBE | i-FIT  | Norm | Conf(%) | Formula          |
|----------|------------|-----|-----|-----|--------|------|---------|------------------|
| 373.0548 | 373.0544   | 0.4 | 1.1 | 8.5 | 1022.7 | n/a  | n/a     | C17 H18 O4 Na S2 |

<sup>1</sup>H spectra of **4g**.

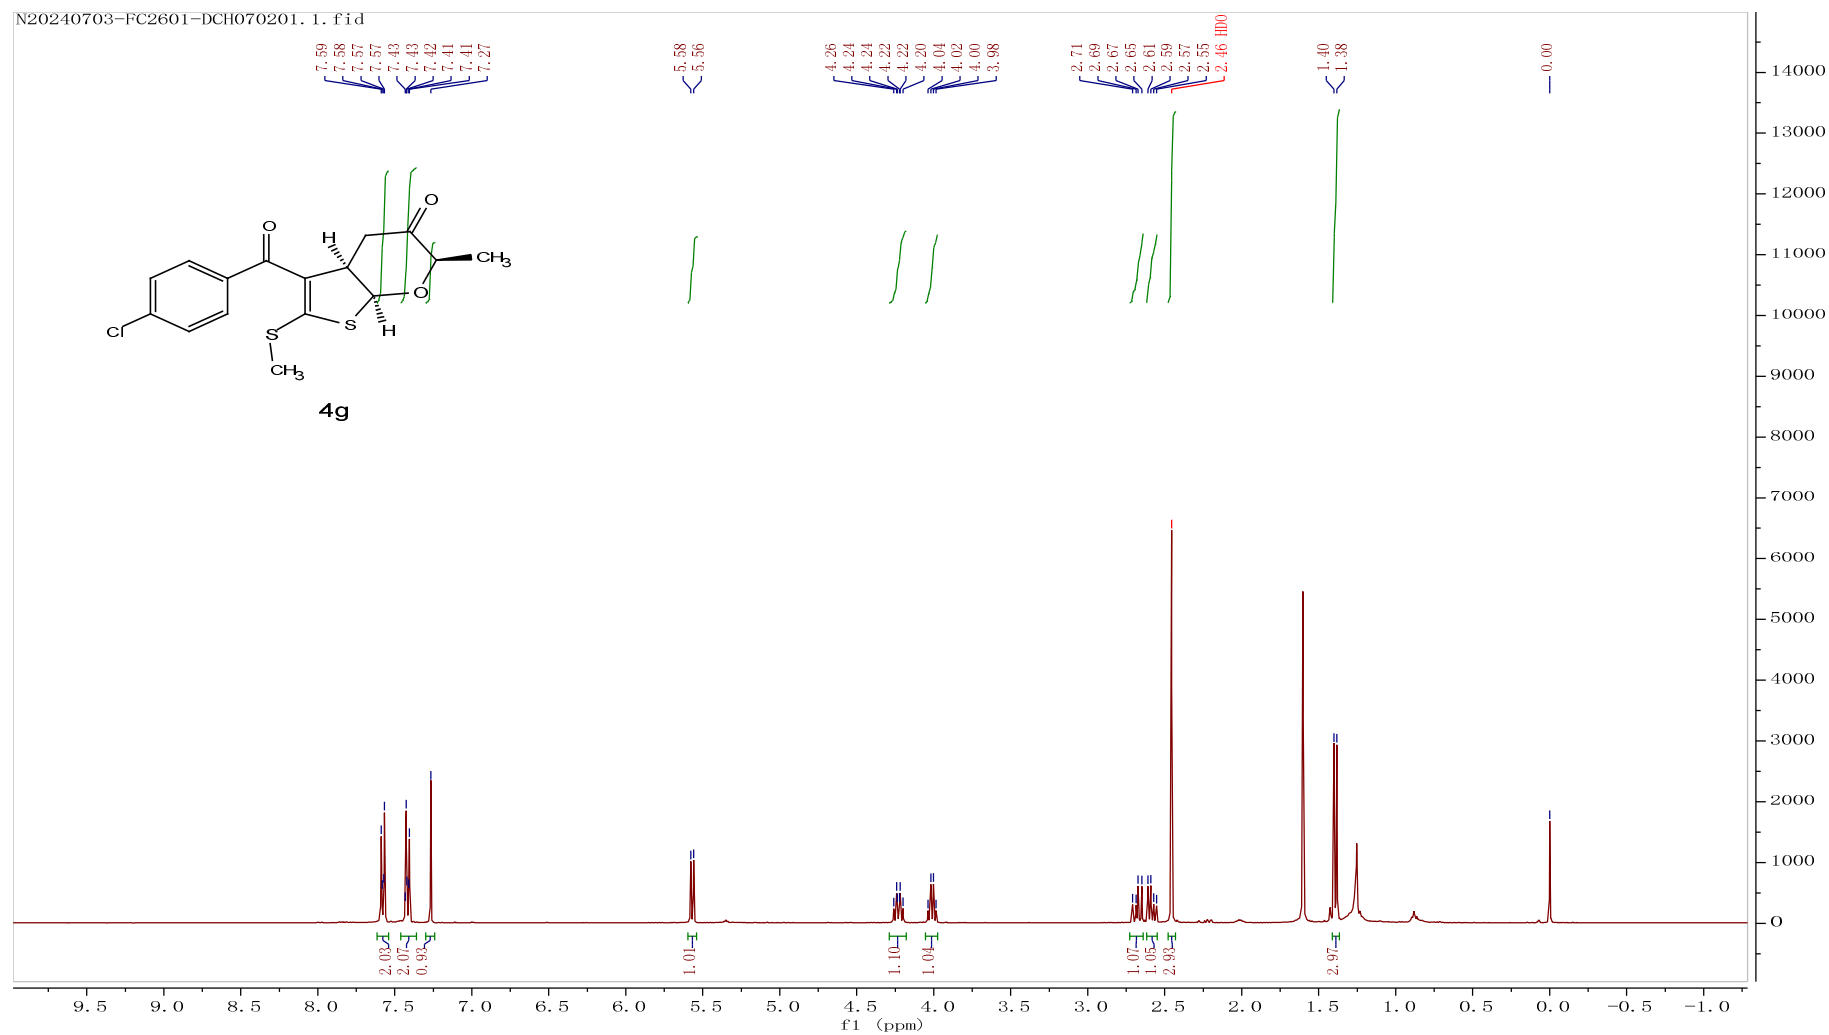

<sup>13</sup>C spectra of **4g**.

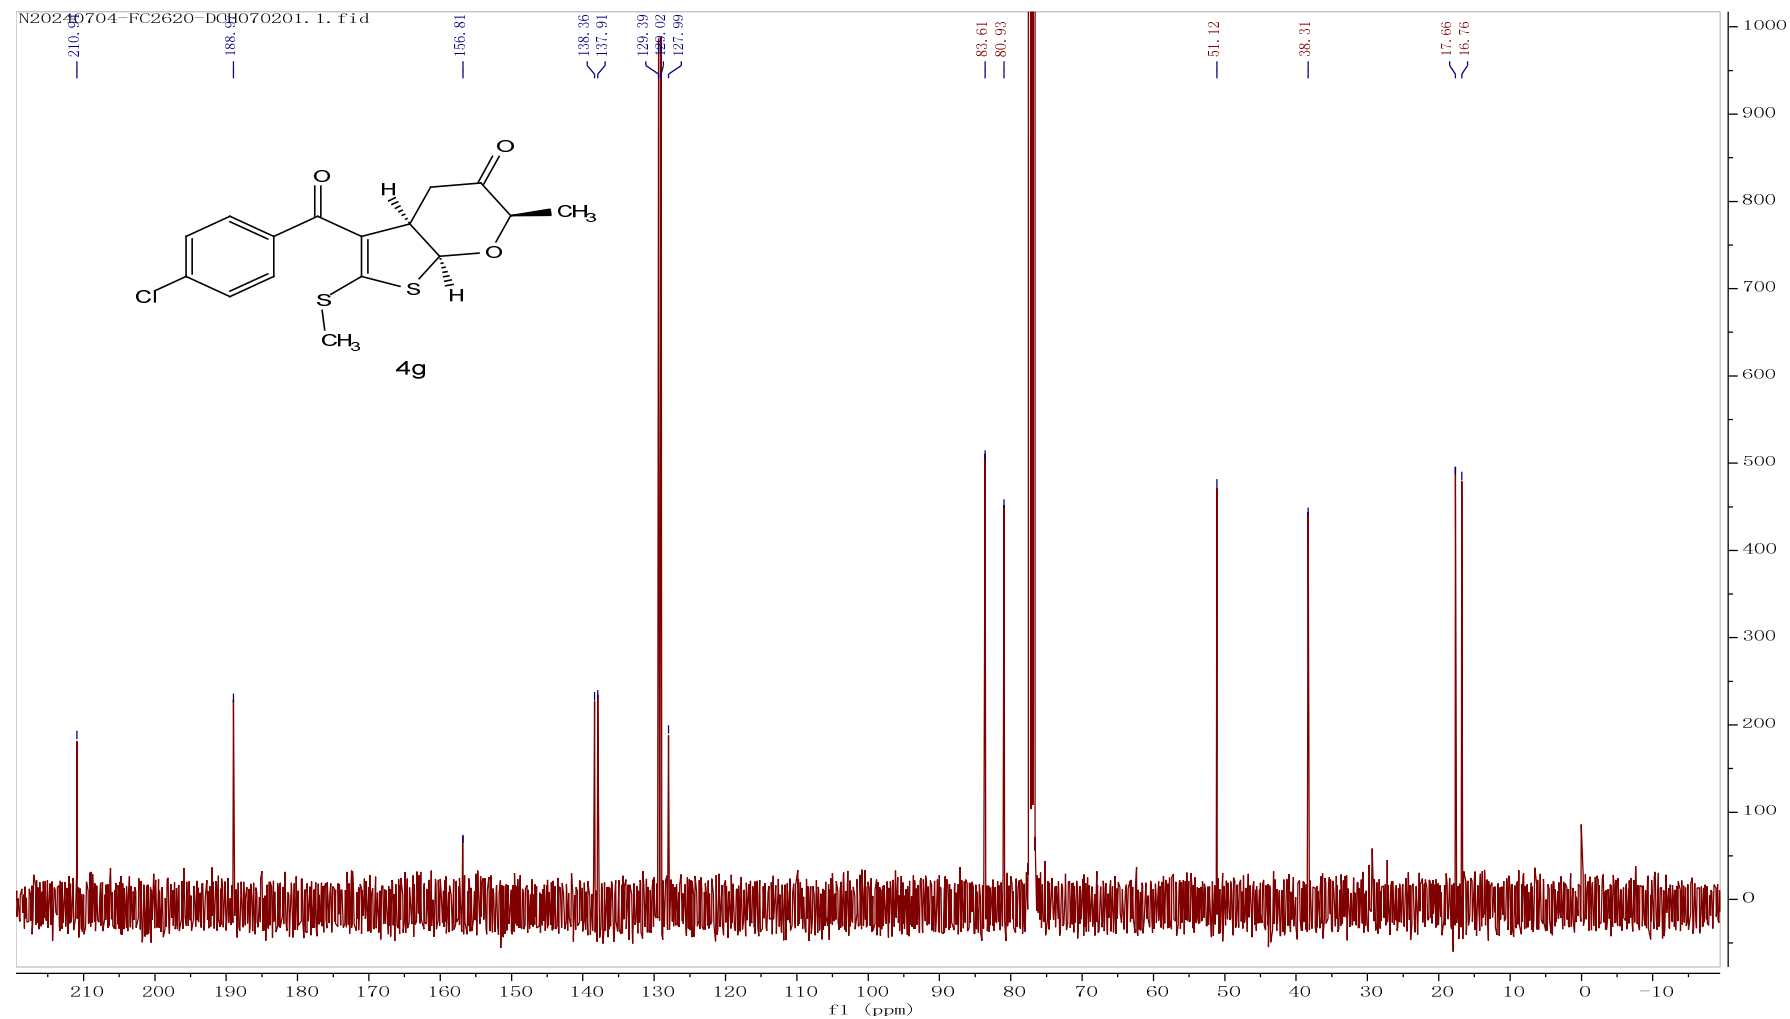

NOESY spectra of **4g**.

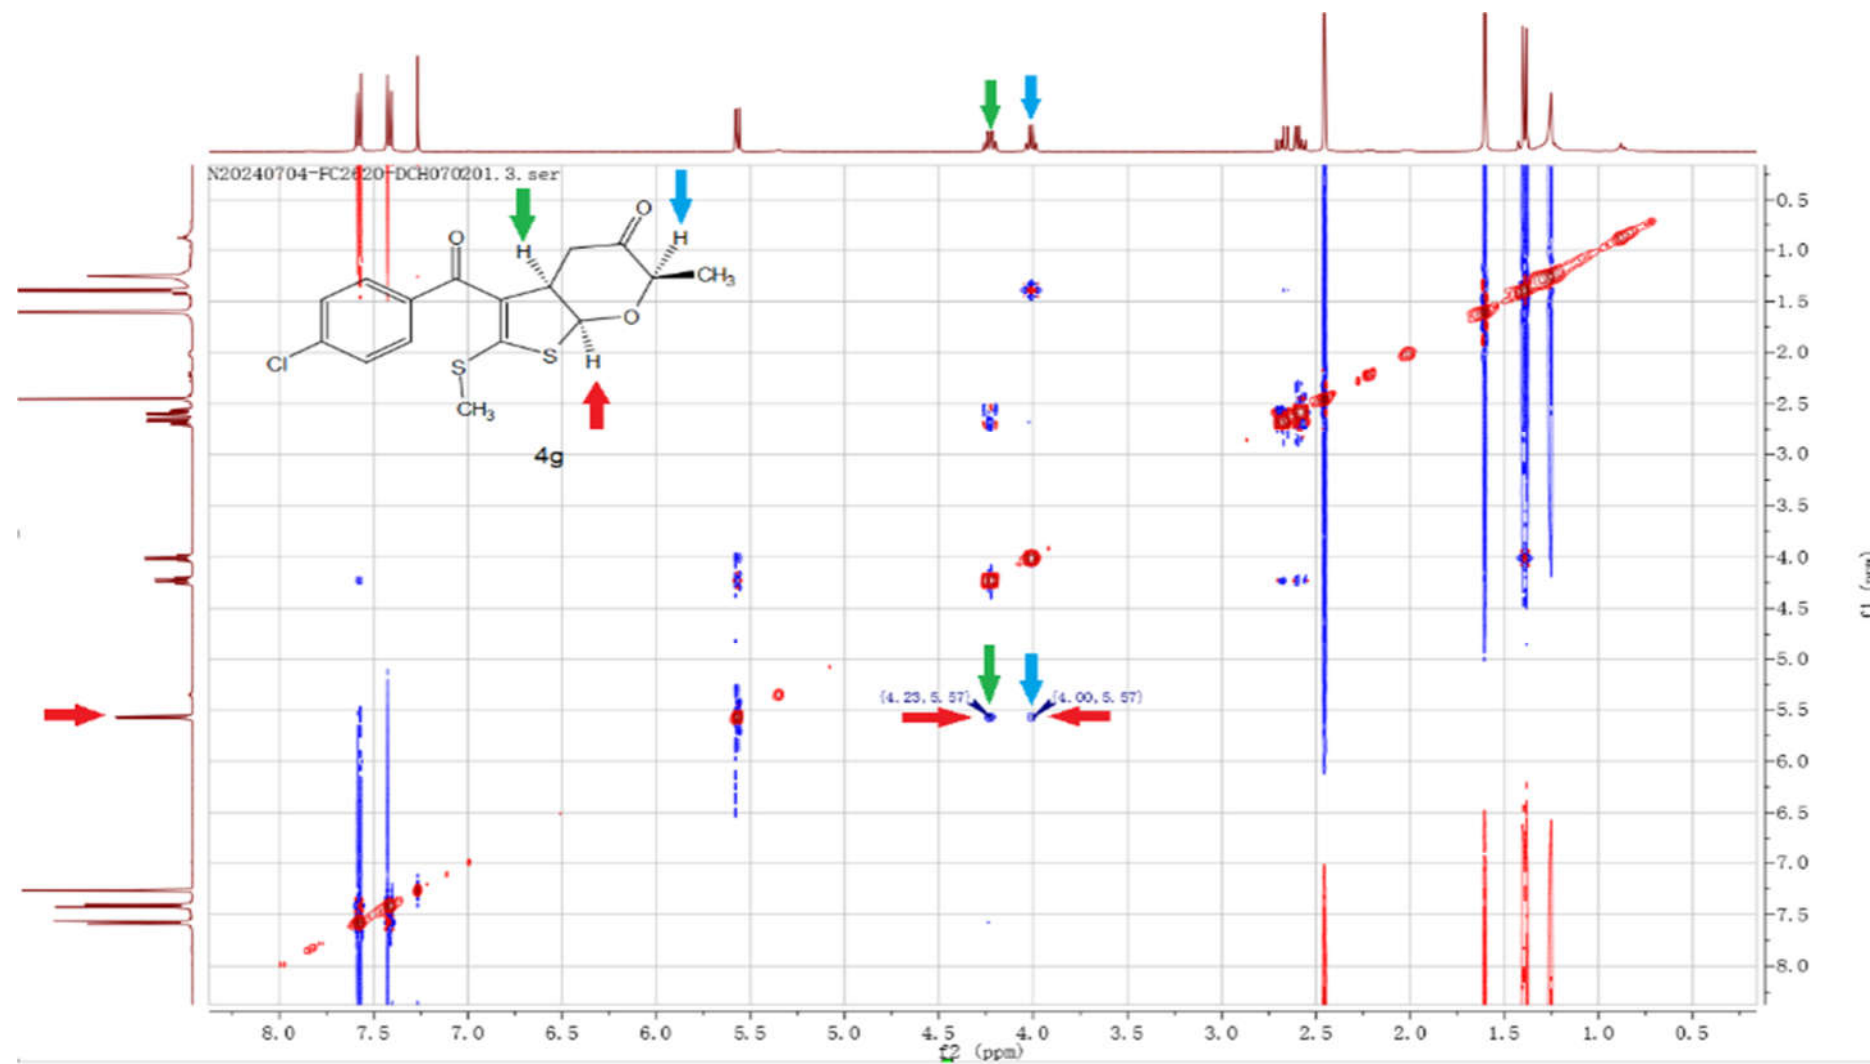



HRMS of 4g.

### Single Mass Analysis

Tolerance = 5.0 mDa / DBE: min = -1.5, max = 50.0

Element prediction: Off

Number of isotope peaks used for i-FIT = 3

Monoisotopic Mass, Even Electron Ions

5349 formula(e) evaluated with 1 results within limits (up to 50 best isotopic matches for each mass)

Elements Used:

C: 16-16 H: 15-15 N: 0-100 O: 0-100 Na: 0-4 S: 1-4 Cl: 1-3

29

240910-5-647-1-4G 27 (0.178)

1: TOF MS ES+  
1.77e+005

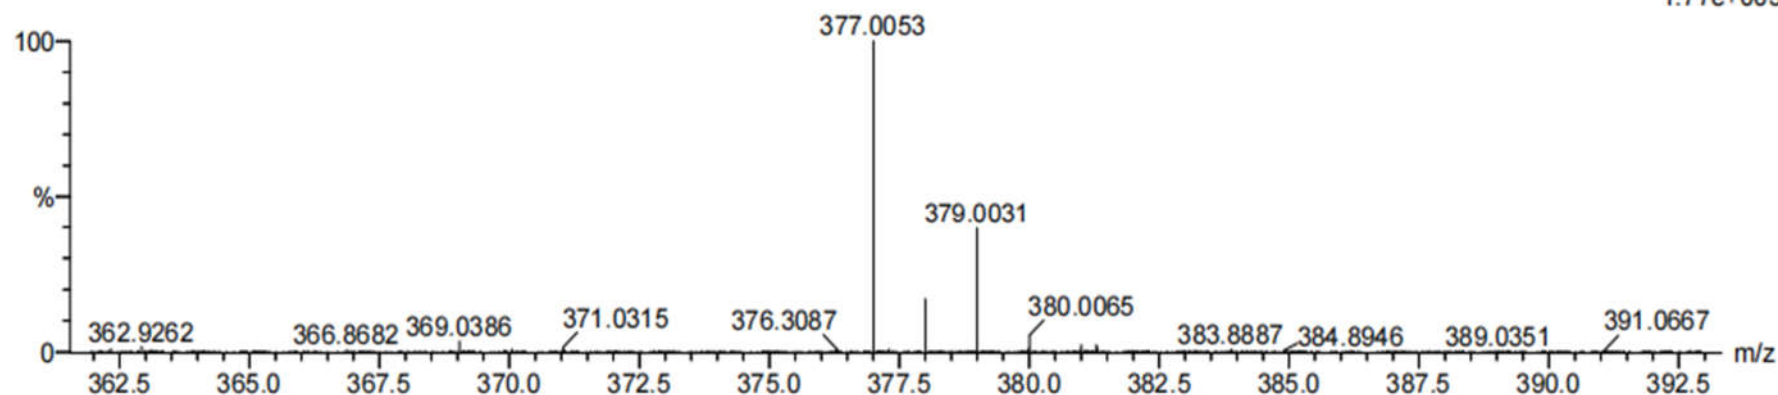

Minimum: -1.5  
Maximum: 5.0 10.0 50.0

| Mass     | Calc. Mass | mDa | PPM | DBE | i-FIT | Norm | Conf(%) | Formula             |
|----------|------------|-----|-----|-----|-------|------|---------|---------------------|
| 377.0053 | 377.0049   | 0.4 | 1.1 | 8.5 | 720.8 | n/a  | n/a     | C16 H15 O3 Na S2 Cl |

N20240704-FC2632-17X070330-1

Chemical structure of compound 4h is shown above the spectrum. The structure is a 1,3-dithiane derivative with a 4-iodophenyl group, a methylthio group, and a methyl group.

**4h**

C[C@H]1O[C@@H](C(=O)C(=C(C1)S)C(=O)c2ccc(I)cc2)[C@H](C)C1=CC=CC=C1

The spectrum displays chemical shifts (f1) in ppm on the x-axis, ranging from 10.0 to -0.5. The y-axis represents intensity, ranging from 0 to 9500. Key peaks are labeled with their chemical shift values:

- Aromatic region (7.27-7.81 ppm): Multiple peaks corresponding to the 4-iodophenyl group.
- Aliphatic region (3.98-4.25 ppm): Peaks corresponding to the methylthio group and the methyl group.
- Aliphatic region (2.40-2.70 ppm): Peaks corresponding to the methyl group.
- Aliphatic region (1.36-1.42 ppm): Peaks corresponding to the methyl group.

The spectrum shows a complex pattern of peaks, indicating the presence of multiple protons in the molecule. The chemical structure 4h is a 1,3-dithiane derivative with a 4-iodophenyl group, a methylthio group, and a methyl group.

<sup>13</sup>C spectra of **4h**.

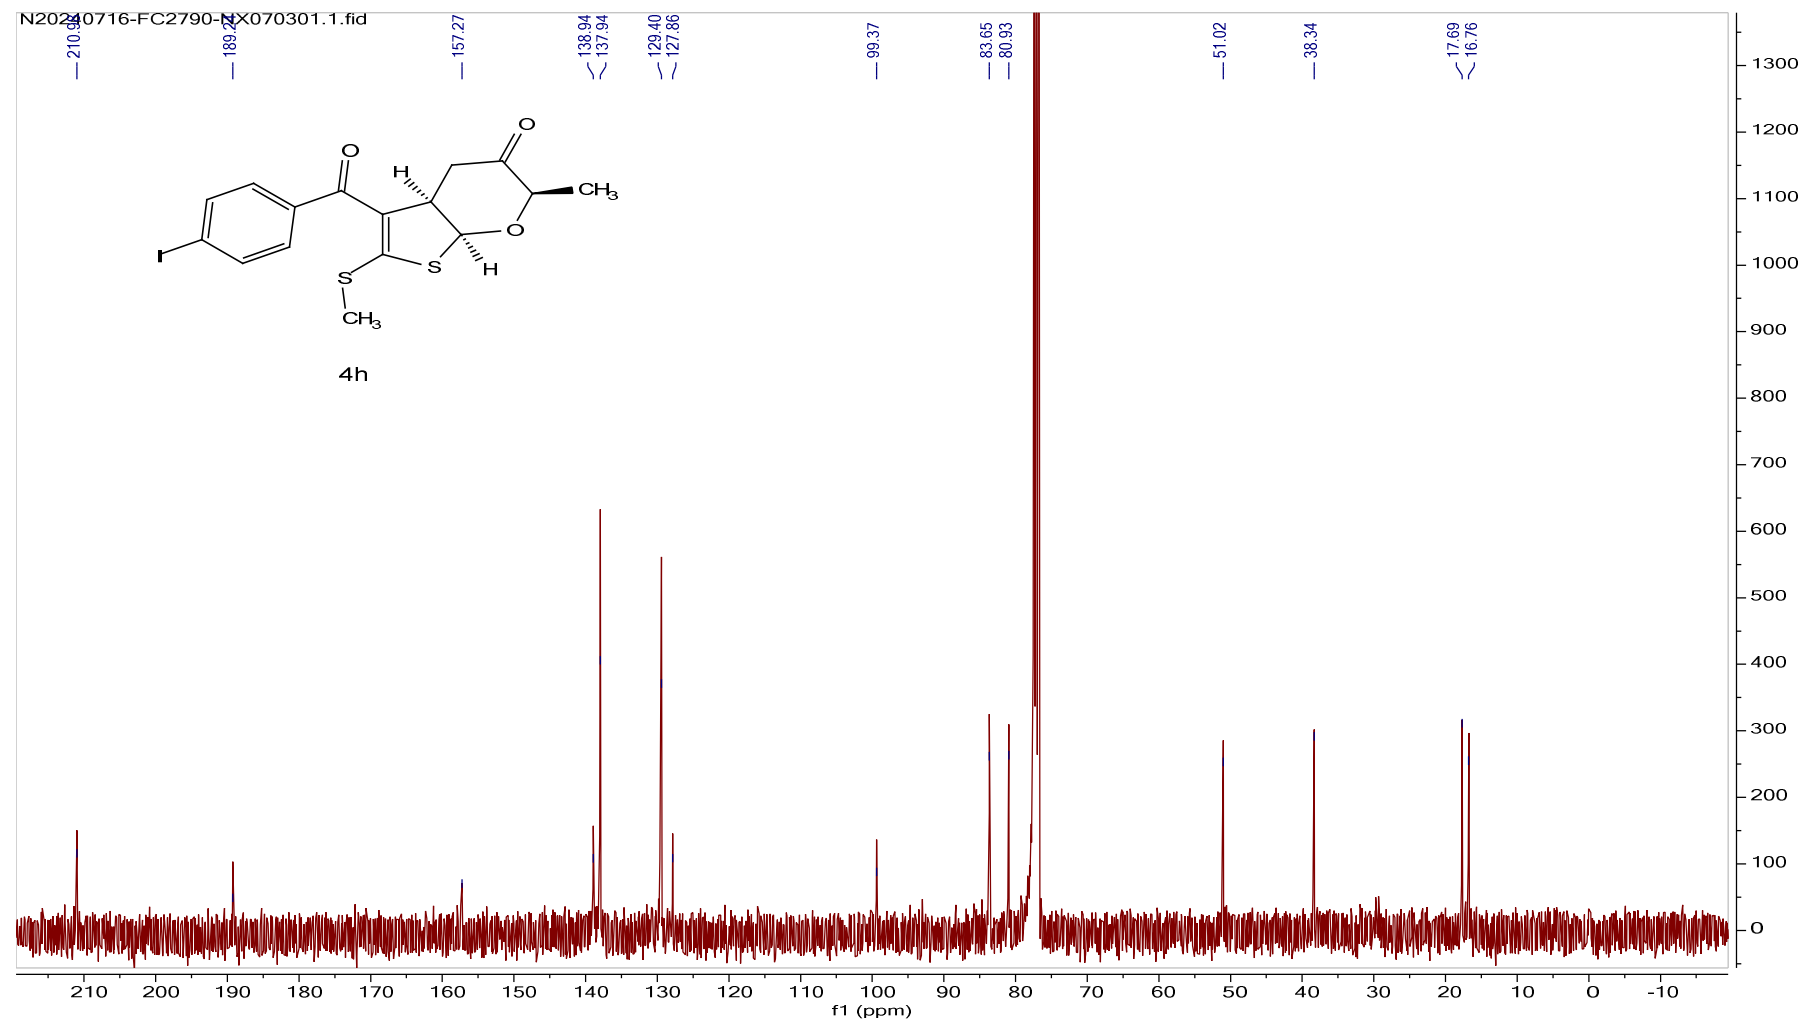

HRMS of 4h.

### Single Mass Analysis

Tolerance = 5.0 mDa / DBE: min = -1.5, max = 50.0

Element prediction: Off

Number of isotope peaks used for i-FIT = 3

Monoisotopic Mass, Even Electron Ions

2951 formula(e) evaluated with 1 results within limits (up to 50 best isotopic matches for each mass)

Elements Used:

C: 16-16 H: 15-15 N: 0-100 O: 0-100 Na: 0-4 S: 1-4 I: 1-3

29

240910-5-647-1-4I 12 (0.100)

1: TOF MS ES+  
1.16e+006

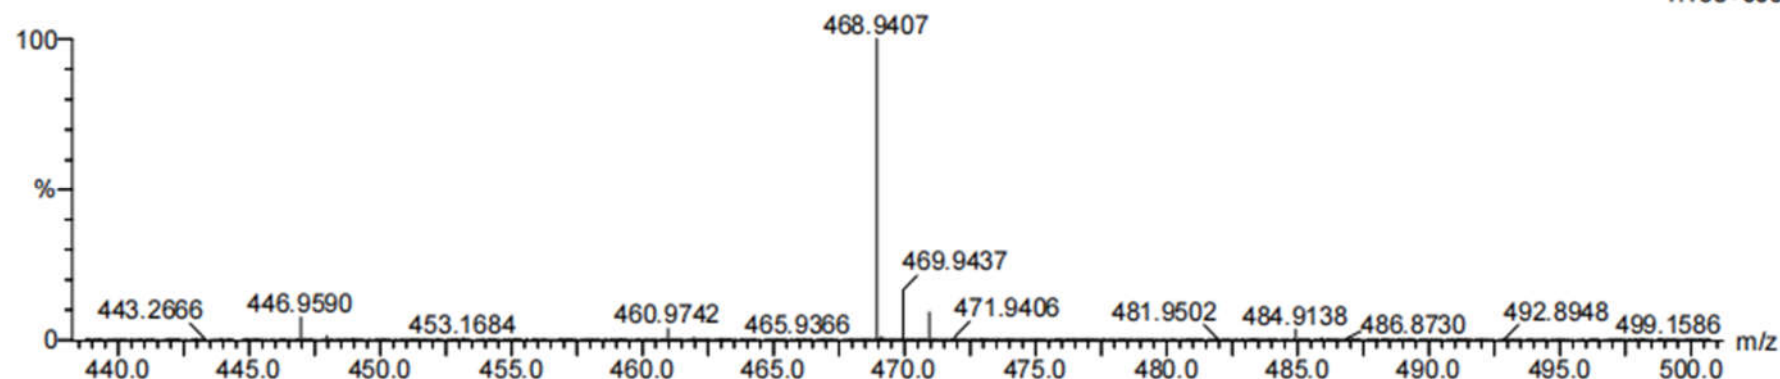

Minimum: -1.5  
Maximum: 5.0 10.0 50.0

| Mass     | Calc. Mass | mDa | PPM | DBE | i-FIT | Norm | Conf(%) | Formula            |
|----------|------------|-----|-----|-----|-------|------|---------|--------------------|
| 468.9407 | 468.9405   | 0.2 | 0.4 | 8.5 | 856.8 | n/a  | n/a     | C16 H15 O3 Na S2 I |

N20240716-FC2792-NX071401

**4i**

Chemical structure of **4i** is shown in the top left corner.

<sup>1</sup>H NMR spectrum (CDCl<sub>3</sub>) showing peaks from 0 to 8 ppm. The x-axis is labeled f1 (ppm) and ranges from 9.5 to -1.0. The y-axis represents intensity from 0 to 5000. Integration values are shown below the baseline: 1.85, 2.07, 0.98, 1.06, 3.17, 1.08, 2.02, 2.83, 2.02, 3.01. Peak labels at the top indicate chemical shifts: 7.68, 7.67, 7.66, 7.27, 7.00, 6.98, 6.96, 6.94, 6.93, 6.92, 6.91, 6.90, 6.89, 5.53, 5.51, 4.27, 4.25, 4.23, 4.21, 3.87, 3.83, 3.82, 3.81, 3.80, 2.62, 2.60, 2.43, 1.88, 1.86, 1.85, 1.84, 1.83, 1.82, 1.81, 1.80, 1.79, 1.77, 1.75, 1.74, 1.72, 1.70, 1.01.

<sup>13</sup>C spectra of 4i.

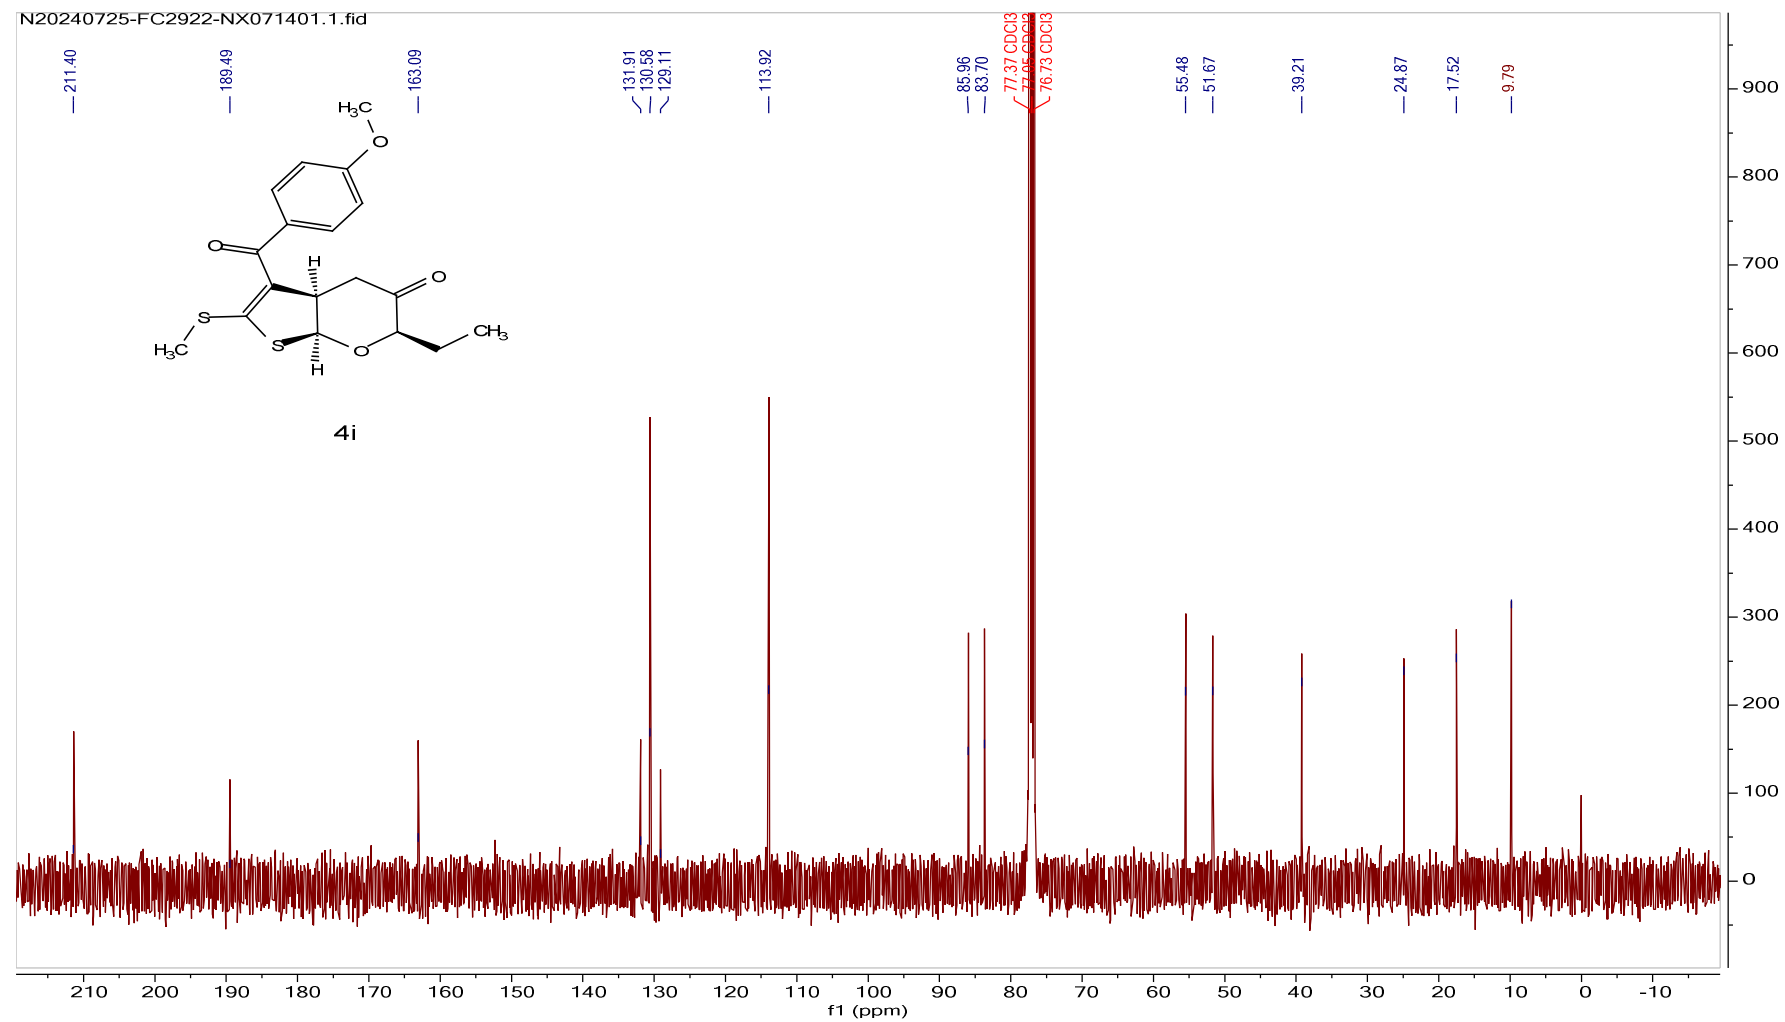

HRMS of 4i.

### Single Mass Analysis

Tolerance = 5.0 mDa / DBE: min = -1.5, max = 50.0

Element prediction: Off

Number of isotope peaks used for i-FIT = 3

Monoisotopic Mass, Even Electron Ions

3261 formula(e) evaluated with 1 results within limits (up to 50 best isotopic matches for each mass)

Elements Used:

C: 18-18 H: 20-20 N: 0-100 O: 0-100 Na: 0-4 S: 1-4

29

240910-5-647-1-4J 17 (0.126)

1: TOF MS ES+  
1.31e+006

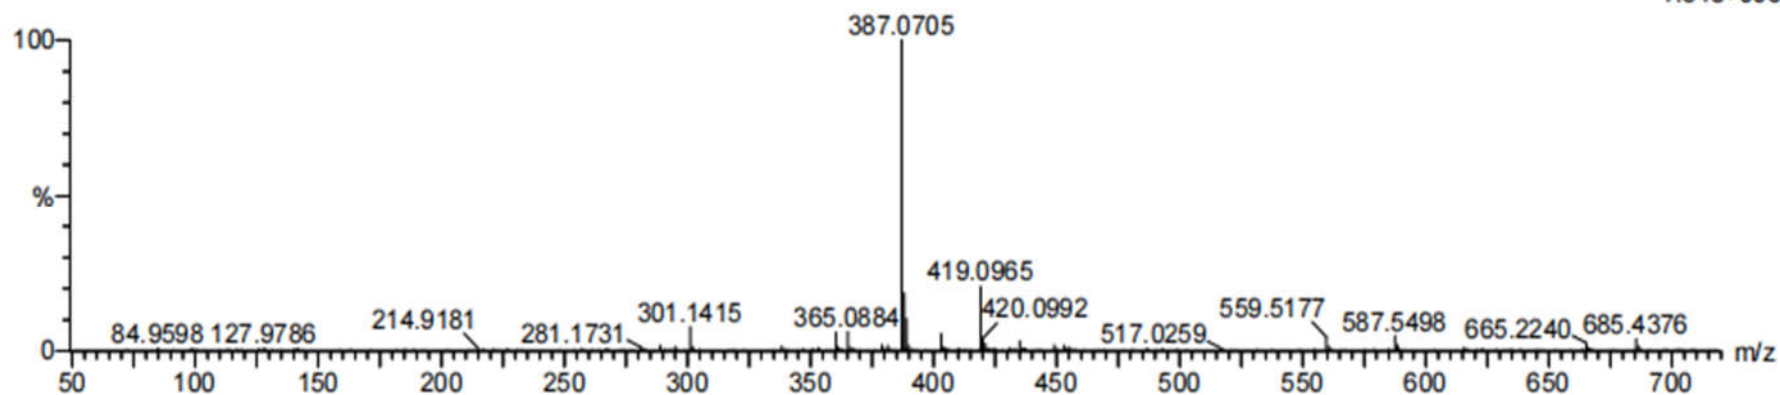

Minimum: -1.5  
Maximum: 5.0 10.0 50.0

| Mass     | Calc. Mass | mDa | PPM | DBE | i-FIT  | Norm | Conf(%) | Formula          |
|----------|------------|-----|-----|-----|--------|------|---------|------------------|
| 387.0705 | 387.0701   | 0.4 | 1.0 | 8.5 | 1001.3 | n/a  | n/a     | C18 H20 O4 Na S2 |

<sup>1</sup>H spectra of **4j**.

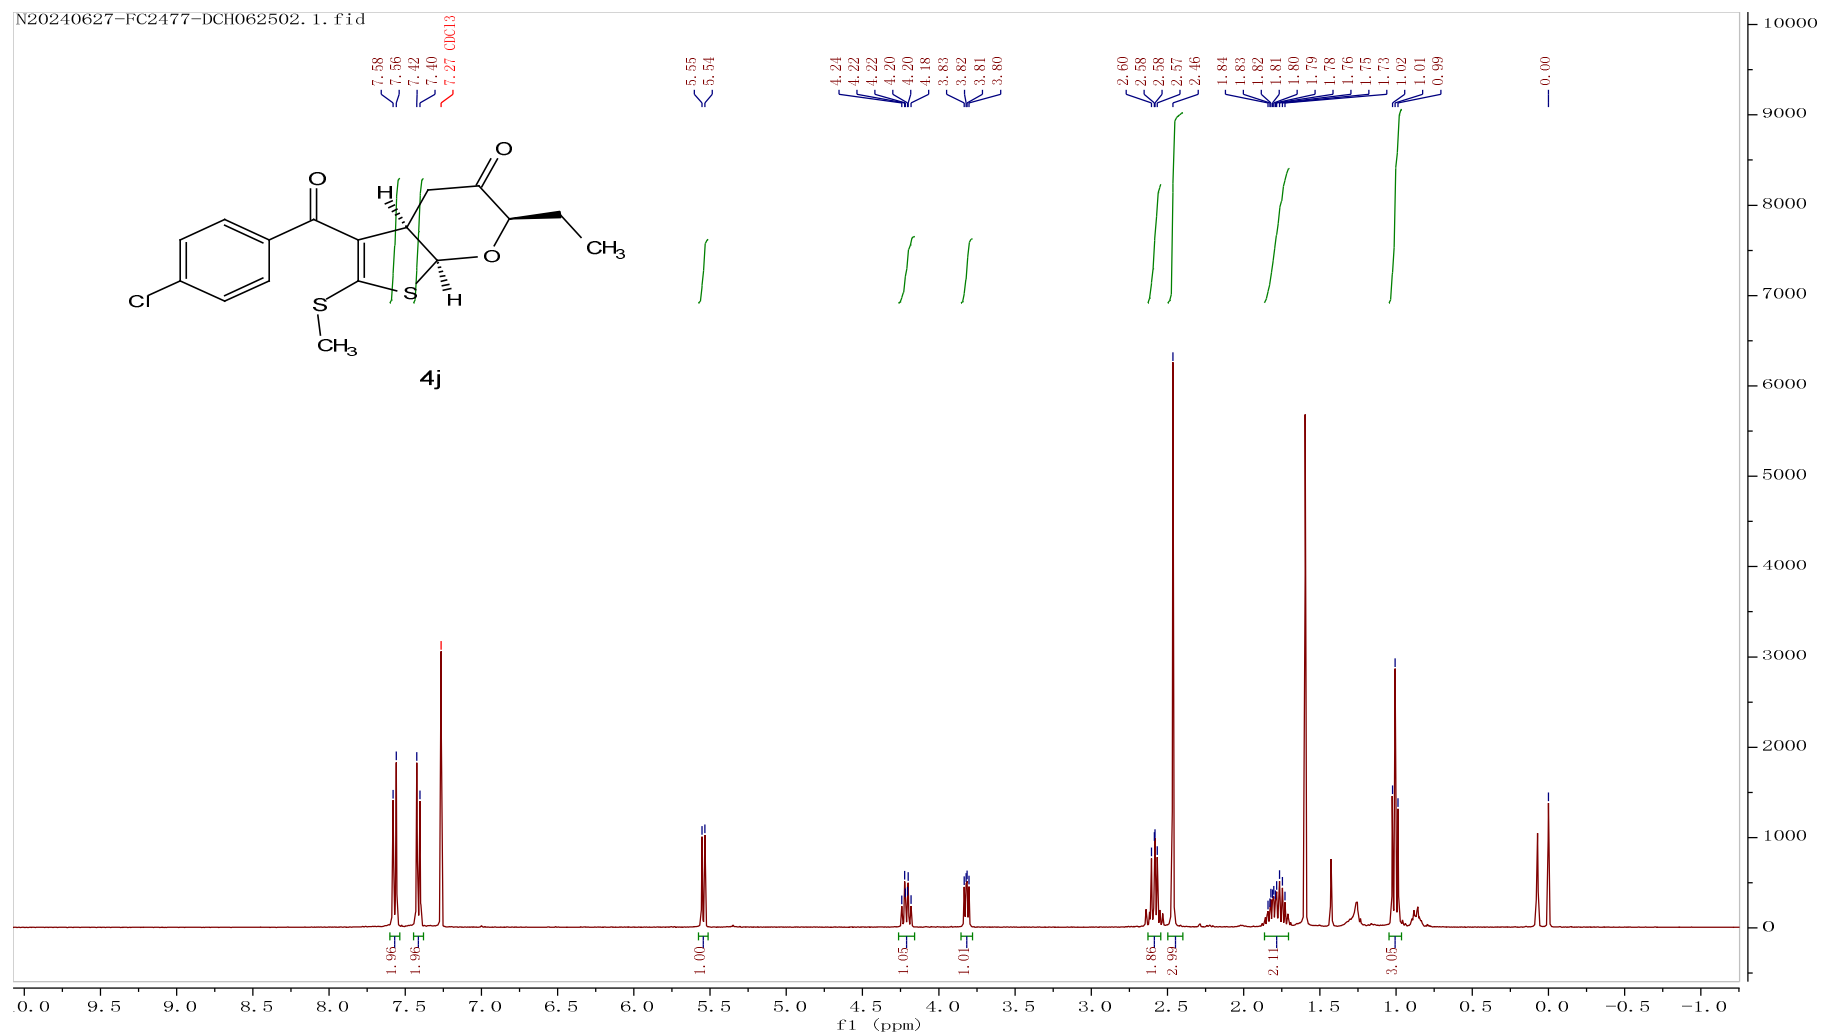



<sup>13</sup>C spectra of **4j**.

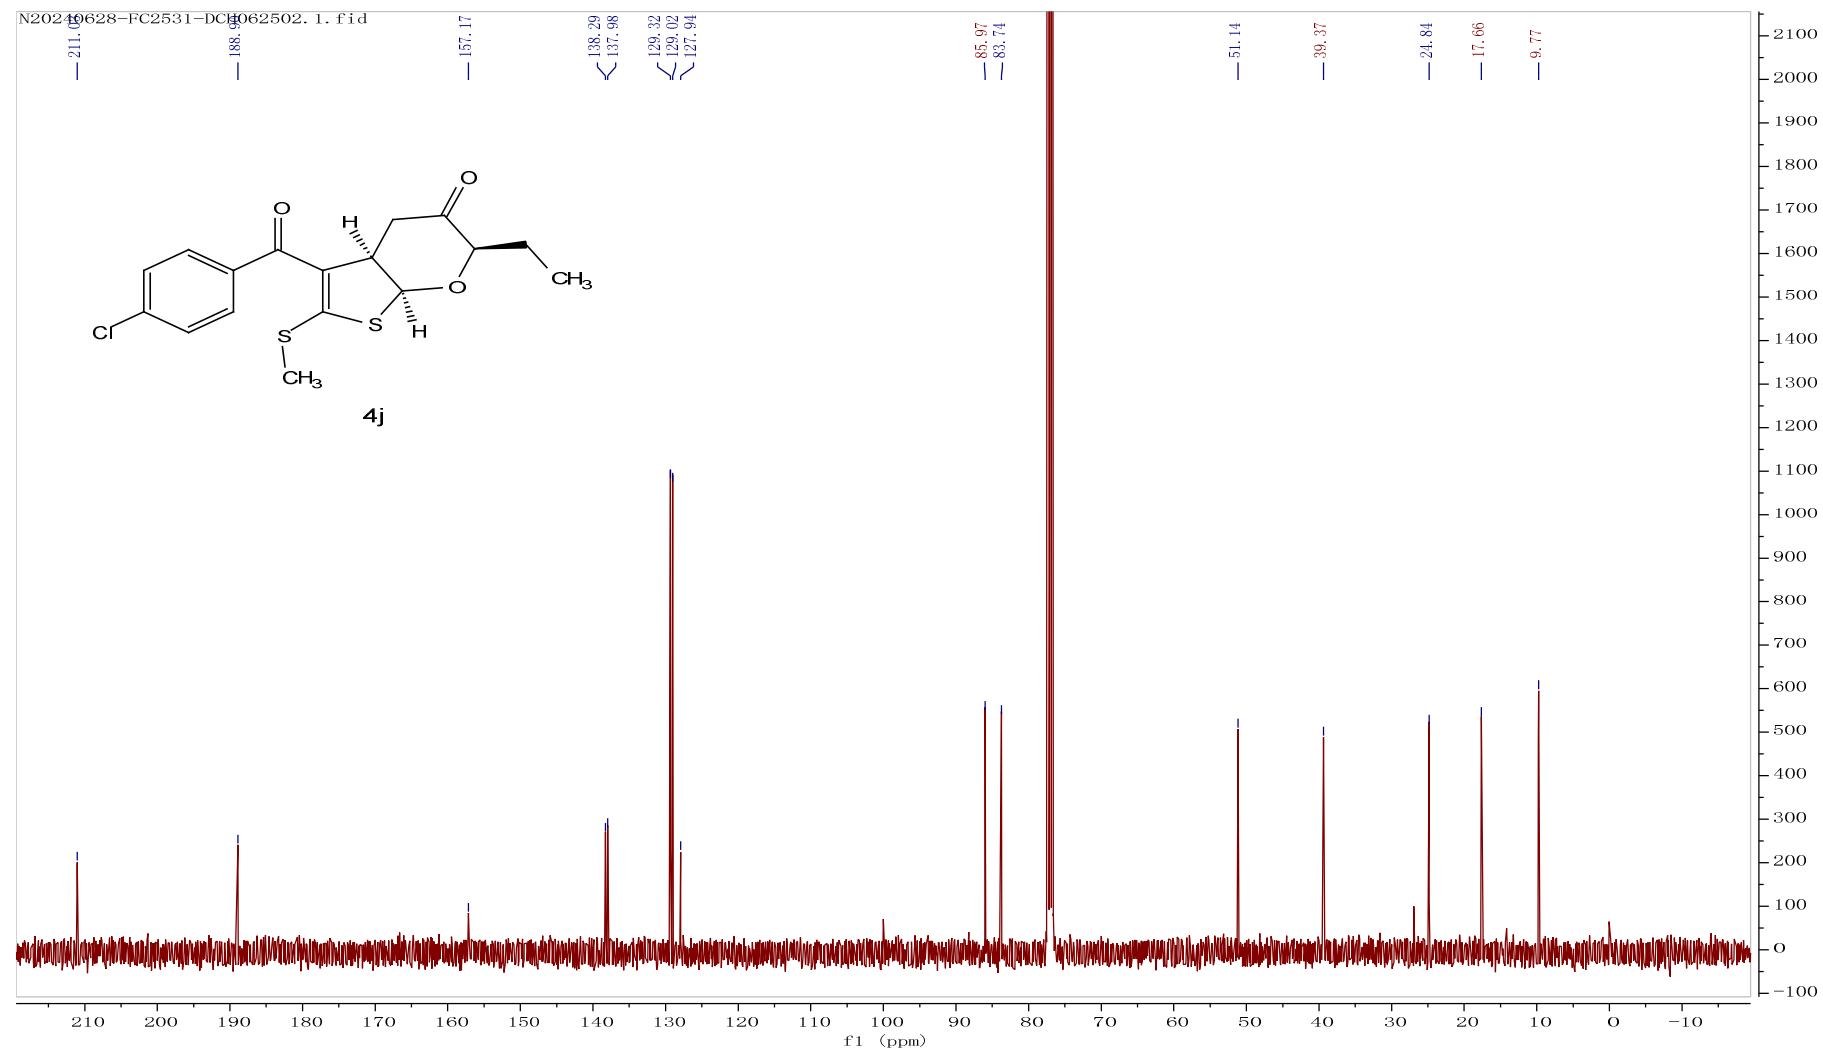

NOESY spectra of **4j**.

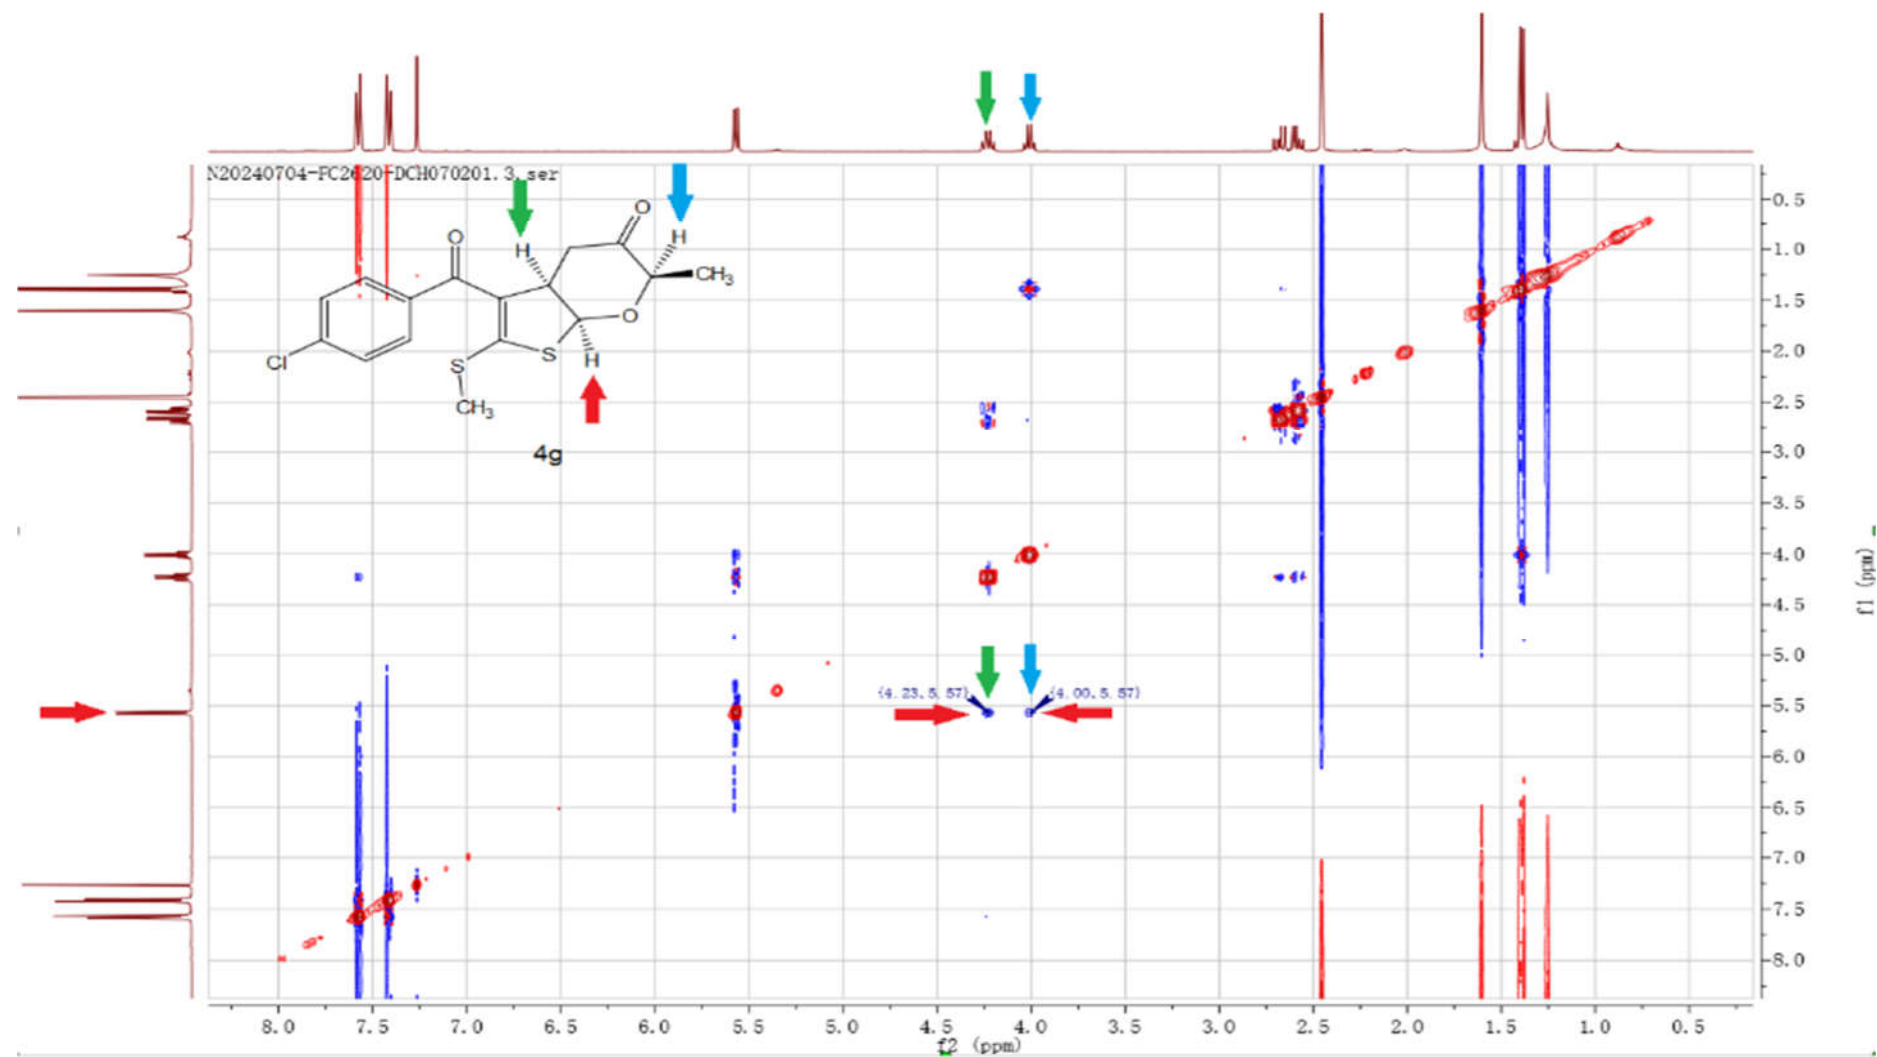

HRMS of 4j.

### Single Mass Analysis

Tolerance = 5.0 mDa / DBE: min = -1.5, max = 50.0

Element prediction: Off

Number of isotope peaks used for i-FIT = 3

Monoisotopic Mass, Even Electron Ions

6092 formula(e) evaluated with 1 results within limits (up to 50 best isotopic matches for each mass)

Elements Used:

C: 17-17 H: 17-17 N: 0-100 O: 0-100 Na: 0-4 S: 1-4 Cl: 1-3

29

240910-5-647-1-4K 11 (0.094)

1: TOF MS ES+  
2.40e+006

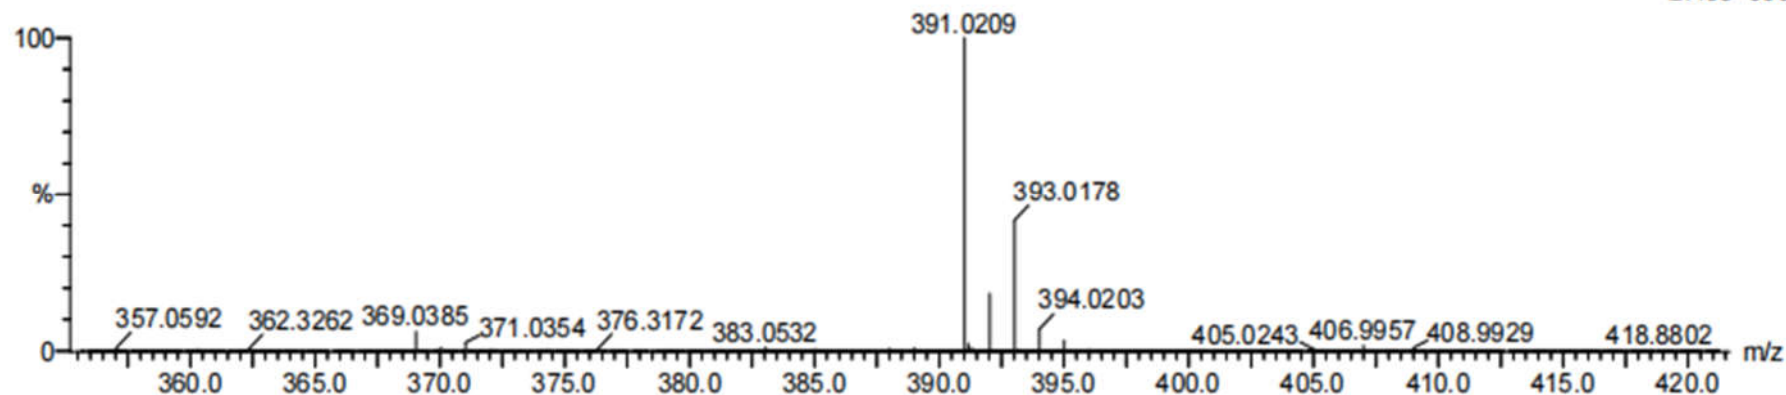

Minimum: -1.5  
Maximum: 5.0 10.0 50.0

| Mass     | Calc. Mass | mDa | PPM | DBE | i-FIT  | Norm | Conf (%) | Formula             |
|----------|------------|-----|-----|-----|--------|------|----------|---------------------|
| 391.0209 | 391.0205   | 0.4 | 1.0 | 8.5 | 1125.0 | n/a  | n/a      | C17 H17 O3 Na S2 Cl |

<sup>1</sup>H spectra of 4k.

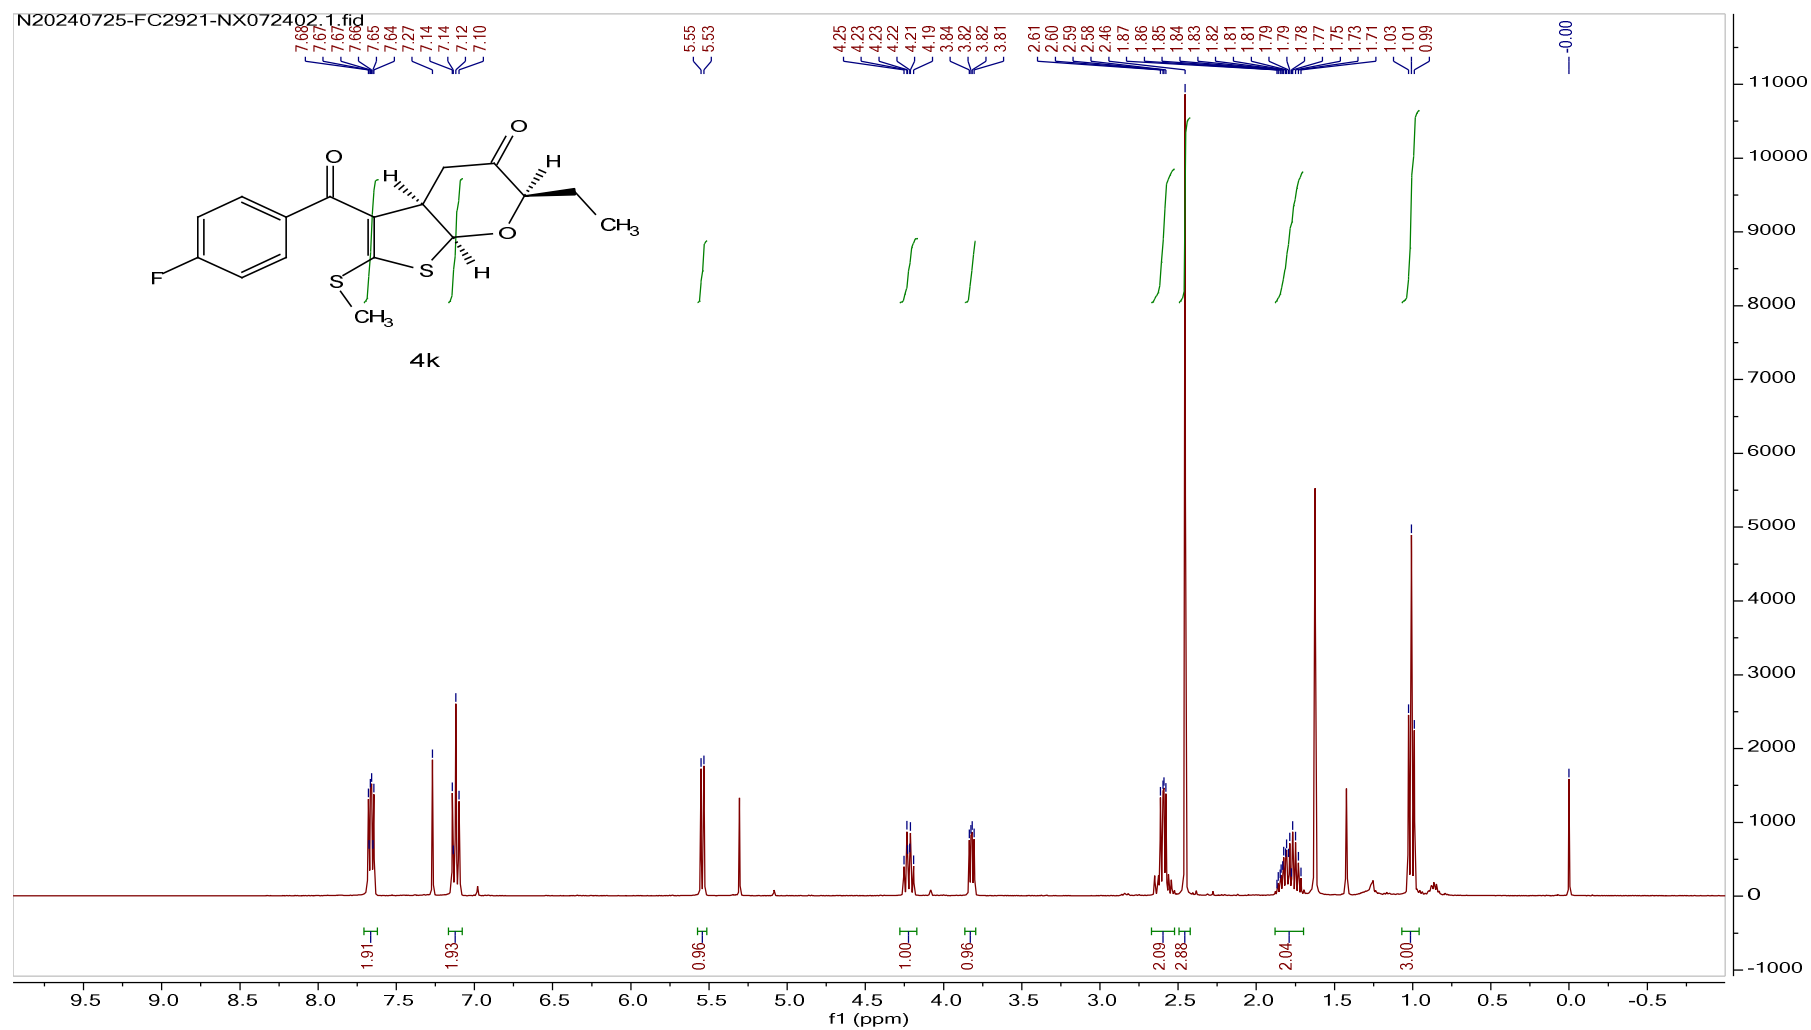

<sup>13</sup>C spectra of 4k.

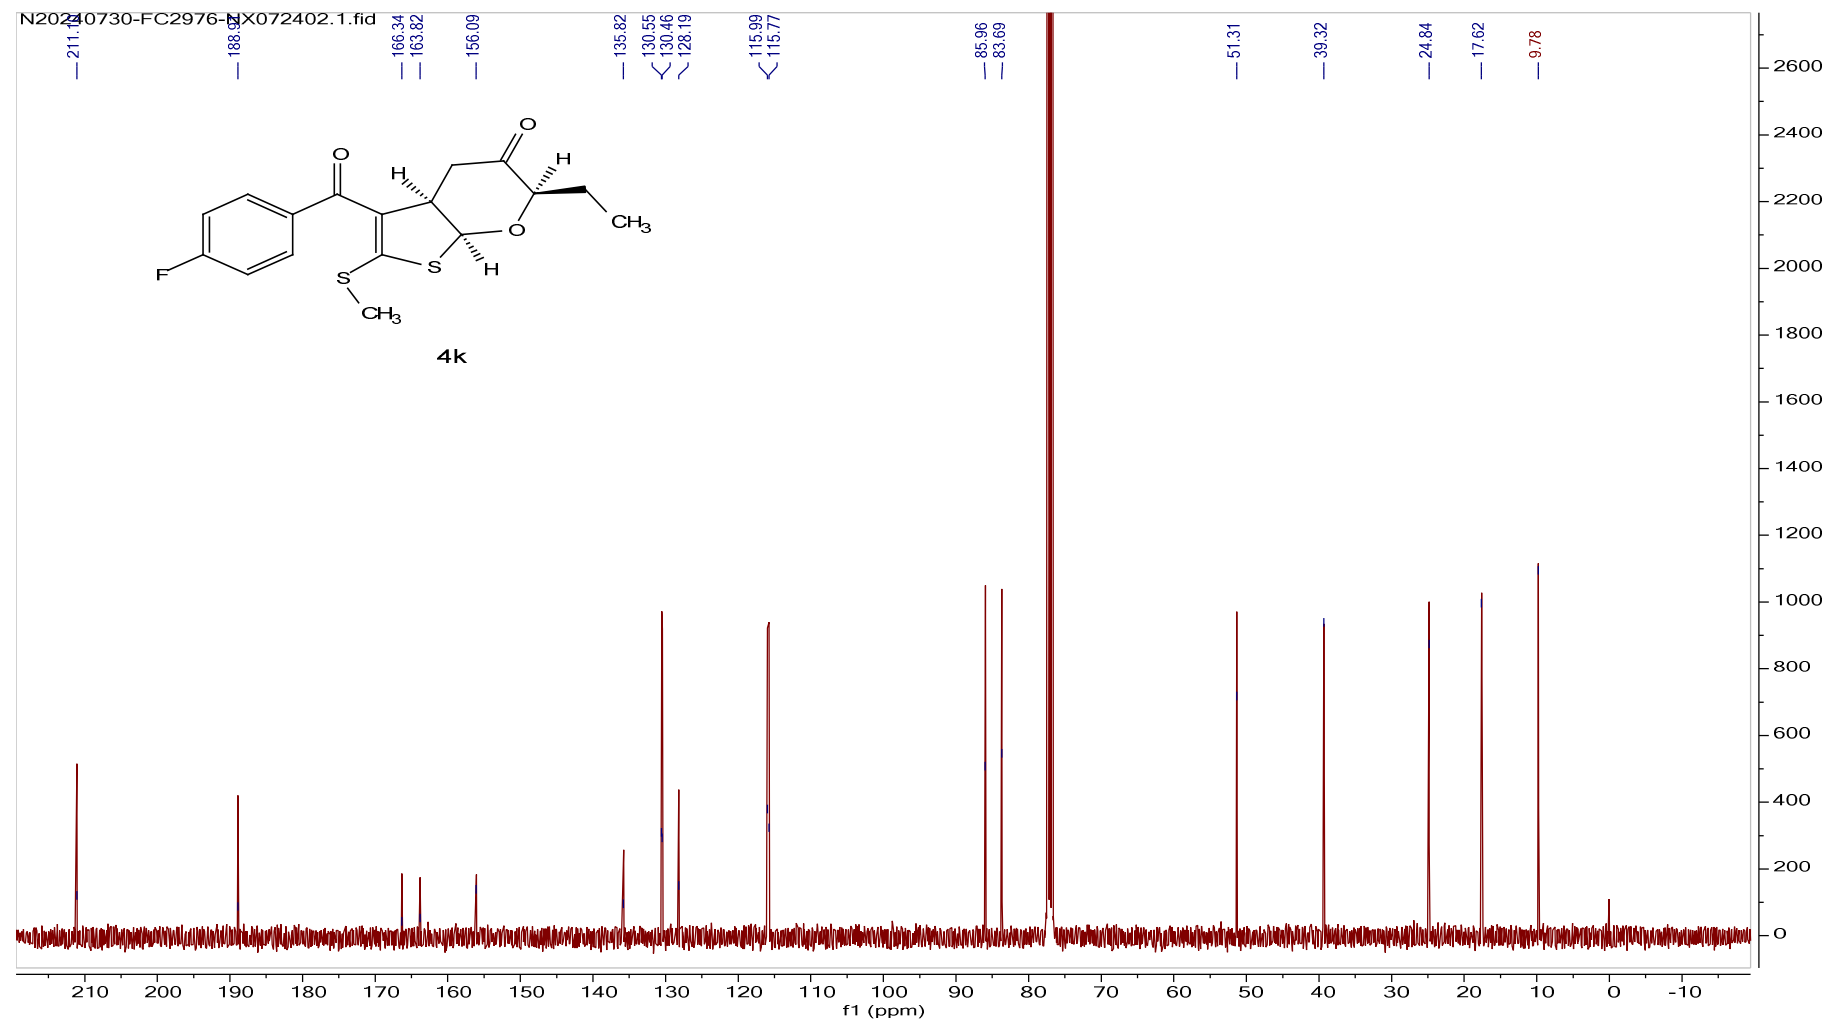

HRMS of 4k.

### Single Mass Analysis

Tolerance = 5.0 mDa / DBE: min = -1.5, max = 50.0

Element prediction: Off

Number of isotope peaks used for i-FIT = 3

Monoisotopic Mass, Even Electron Ions

2622 formula(e) evaluated with 1 results within limits (up to 50 best isotopic matches for each mass)

Elements Used:

C: 17-17 H: 17-17 N: 0-100 O: 0-100 Na: 0-4 S: 1-4 F: 1-1

29

240910-5-647-1-4L 14 (0.110)

1: TOF MS ES+  
2.07e+006

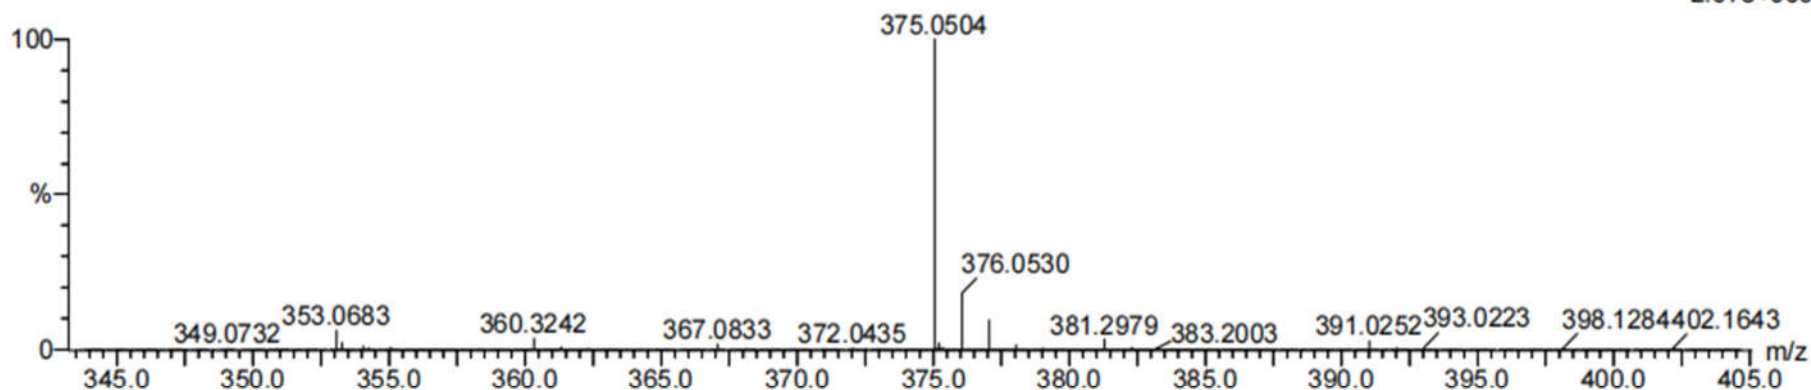

Minimum: -1.5  
Maximum: 5.0 10.0 50.0

| Mass     | Calc. Mass | mDa | PPM | DBE | i-FIT  | Norm | Conf (%) | Formula            |
|----------|------------|-----|-----|-----|--------|------|----------|--------------------|
| 375.0504 | 375.0501   | 0.3 | 0.8 | 8.5 | 1104.1 | n/a  | n/a      | C17 H17 O3 Na S2 F |

<sup>1</sup>H spectra of **4l**.

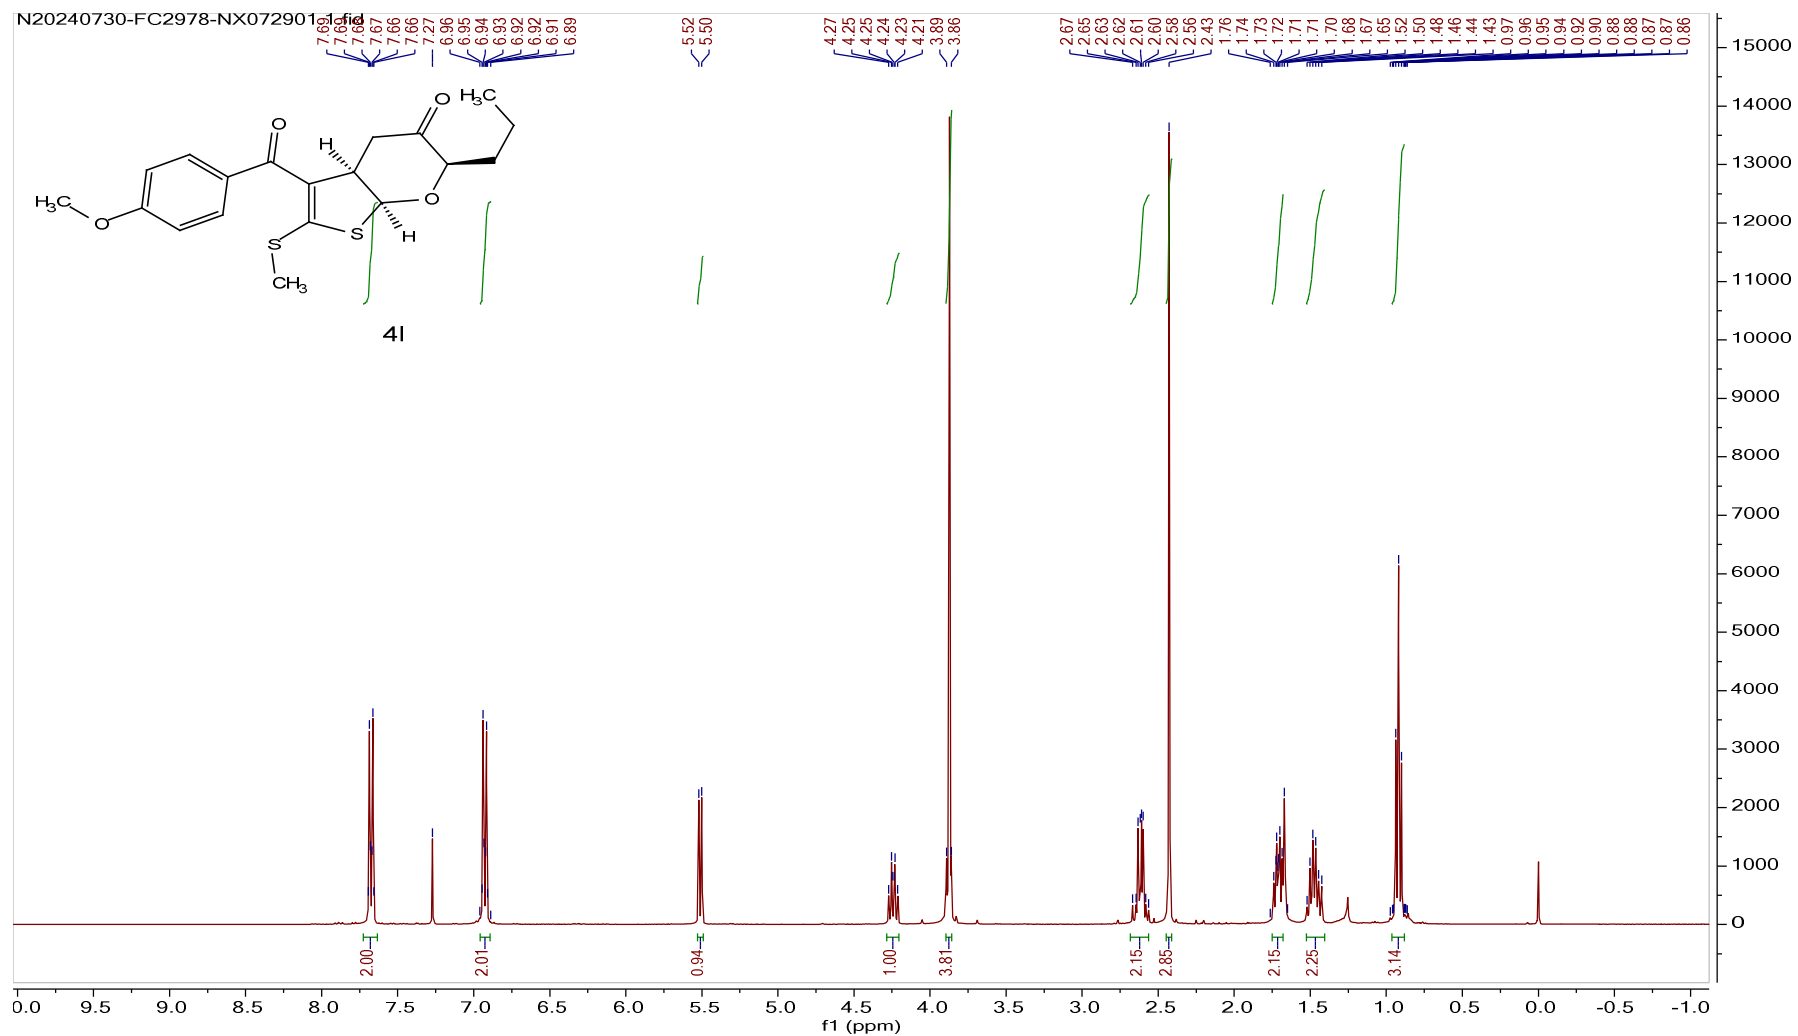

<sup>13</sup>C spectra of 4l.

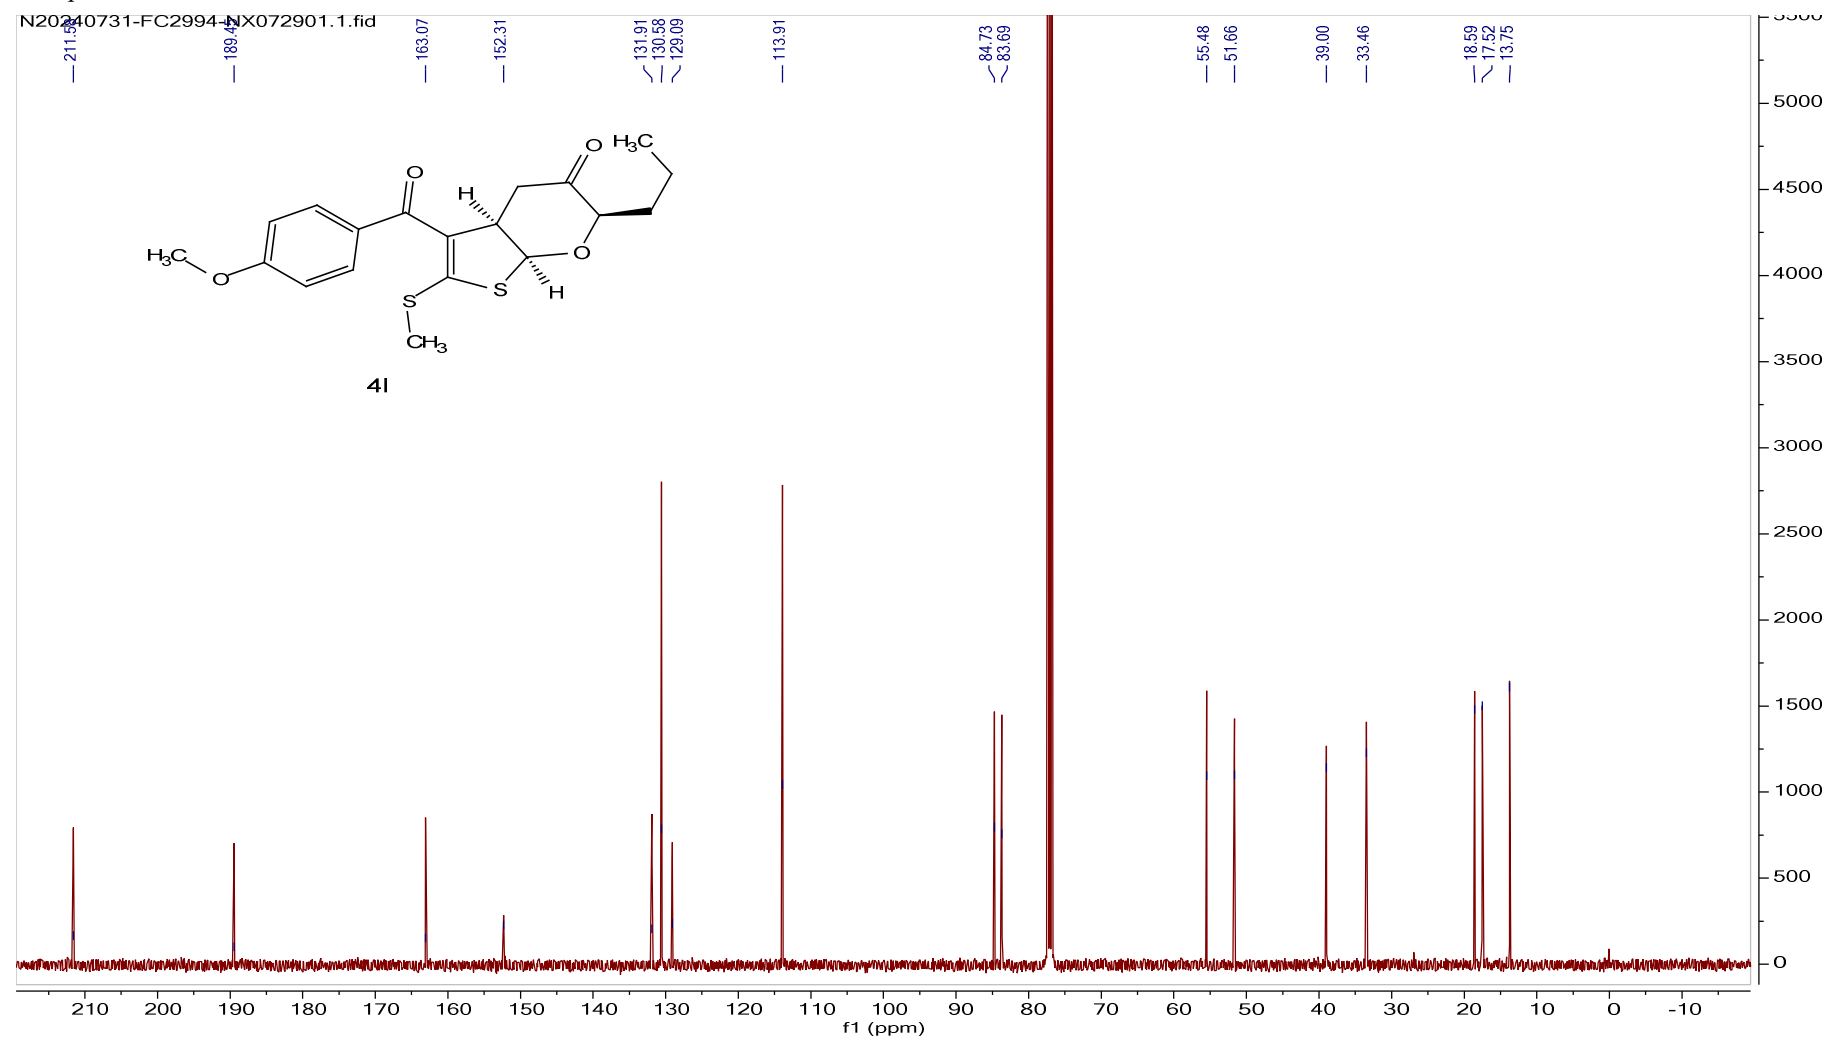



HRMS of 4L

### Single Mass Analysis

Tolerance = 5.0 mDa / DBE: min = -1.5, max = 50.0

Element prediction: Off

Number of isotope peaks used for i-FIT = 3

Monoisotopic Mass, Even Electron Ions

3604 formula(e) evaluated with 1 results within limits (up to 50 best isotopic matches for each mass)

Elements Used:

C: 19-19 H: 22-22 N: 0-100 O: 0-100 Na: 0-4 S: 1-4

29

240910-5-647-1-4M 16 (0.121)

1: TOF MS ES+  
2.64e+006

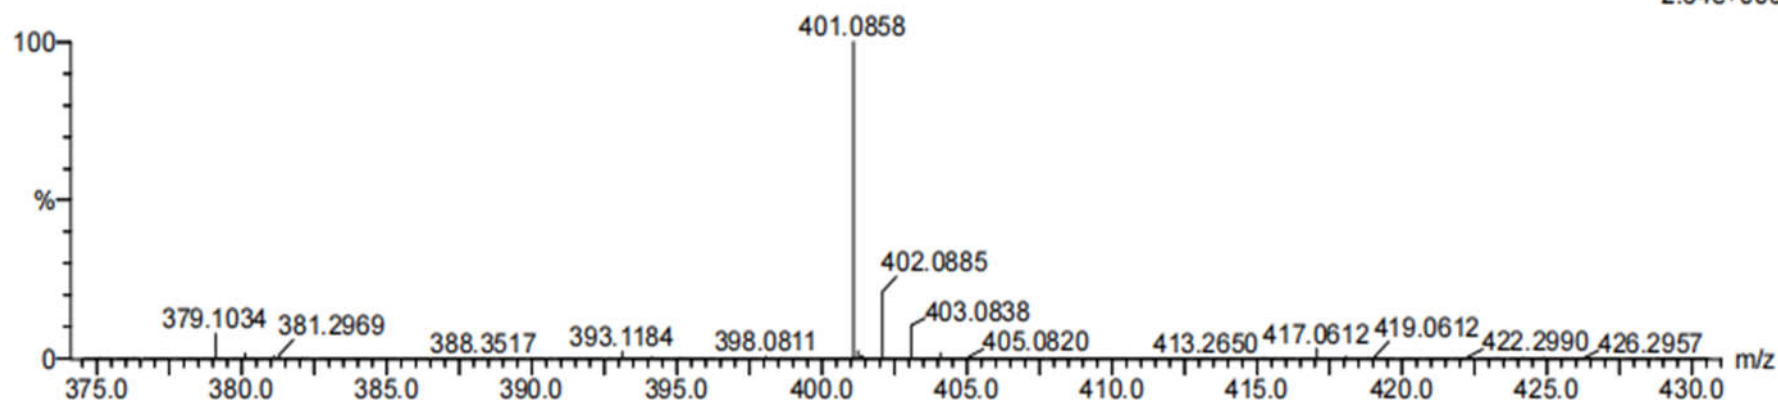

Minimum: -1.5  
Maximum: 5.0 10.0 50.0

| Mass     | Calc. Mass | mDa | PPM | DBE | i-FIT  | Norm | Conf(%) | Formula          |
|----------|------------|-----|-----|-----|--------|------|---------|------------------|
| 401.0858 | 401.0857   | 0.1 | 0.2 | 8.5 | 1075.3 | n/a  | n/a     | C19 H22 O4 Na S2 |

<sup>1</sup>H spectra of **4m**.

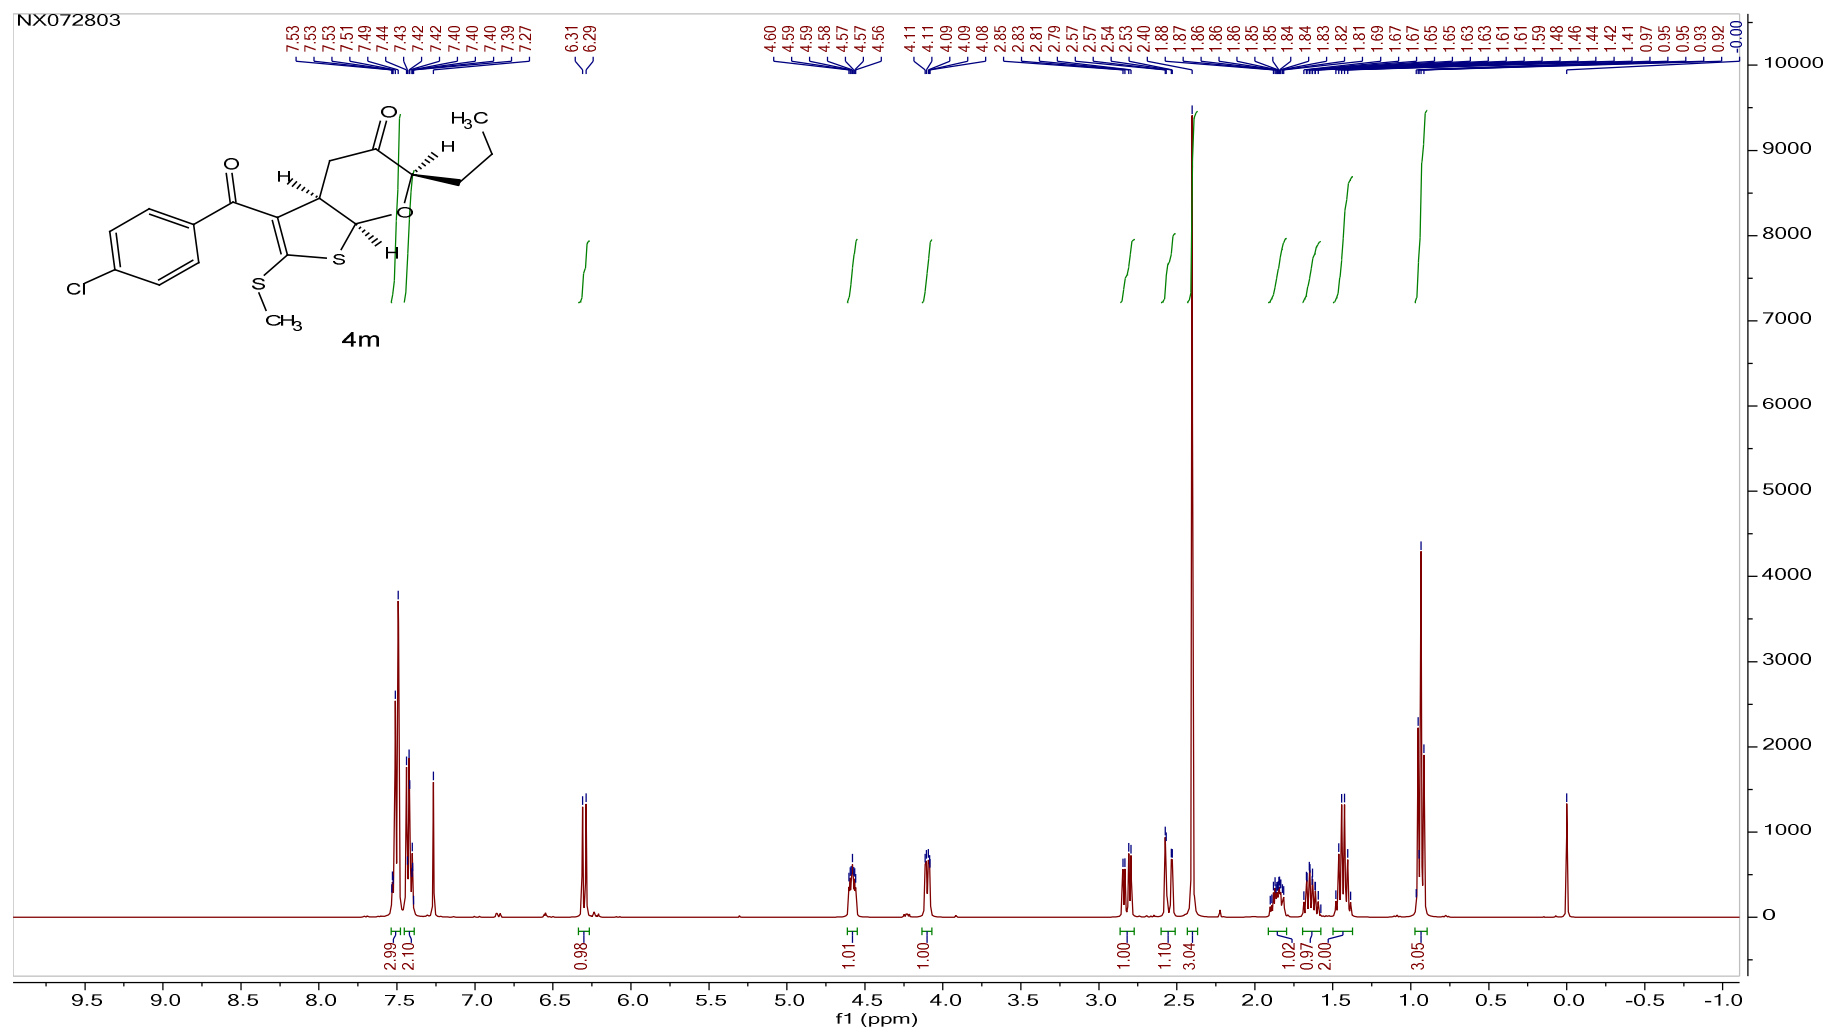

<sup>13</sup>C spectra of 4m.

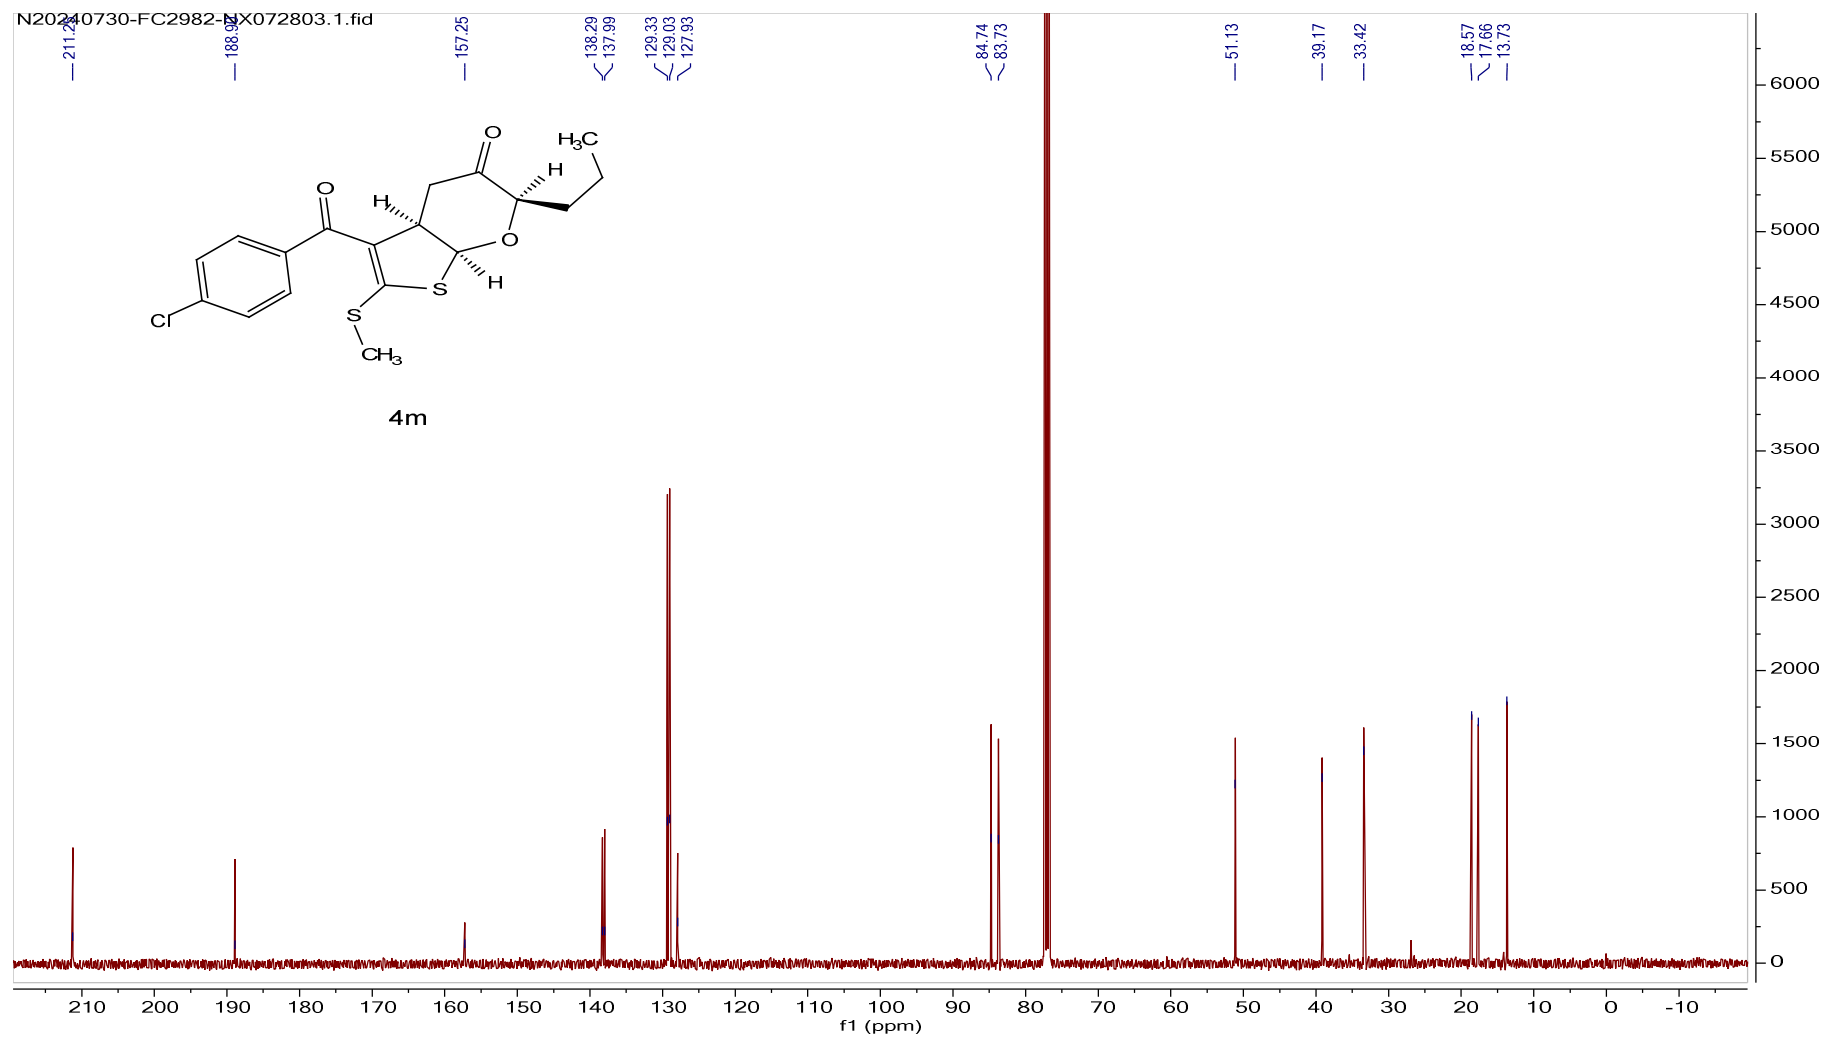

HRMS of 4m.

### Single Mass Analysis

Tolerance = 5.0 mDa / DBE: min = -1.5, max = 50.0

Element prediction: Off

Number of isotope peaks used for i-FIT = 3

Monoisotopic Mass, Even Electron Ions

6889 formula(e) evaluated with 1 results within limits (up to 50 best isotopic matches for each mass)

Elements Used:

C: 18-18 H: 19-19 N: 0-100 O: 0-100 Na: 0-4 S: 1-4 Cl: 1-3

29

240910-5-647-1-4N 17 (0.126)

1: TOF MS ES+  
1.28e+006

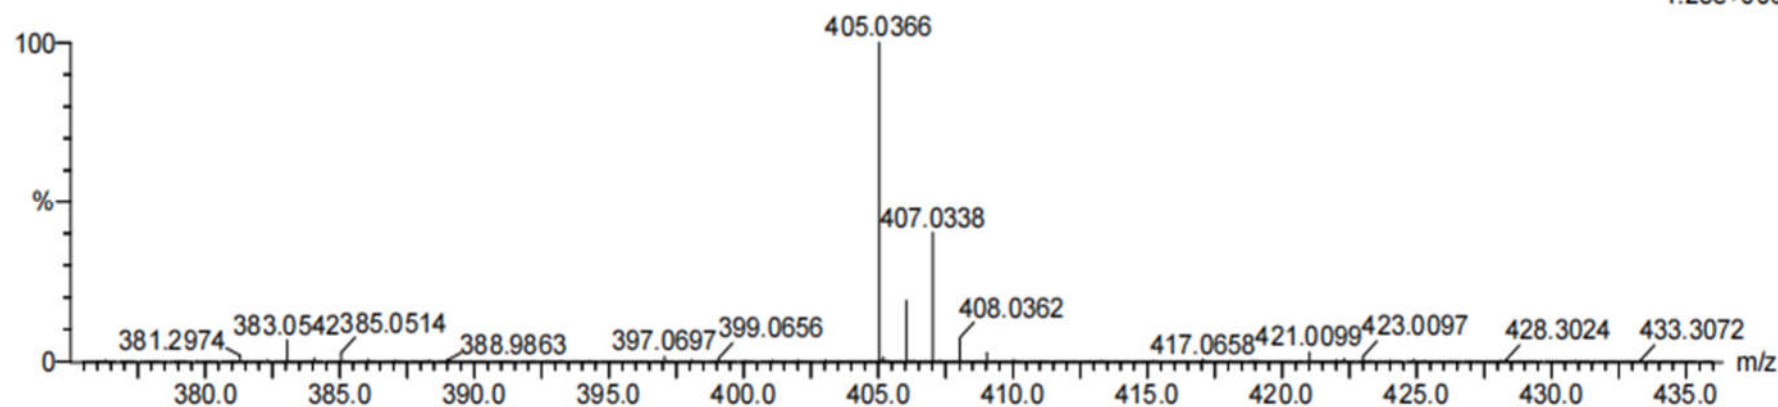

Minimum: -1.5  
Maximum: 5.0 10.0 50.0

| Mass     | Calc. Mass | mDa | PPM | DBE | i-FIT  | Norm | Conf (%) | Formula             |
|----------|------------|-----|-----|-----|--------|------|----------|---------------------|
| 405.0366 | 405.0362   | 0.4 | 1.0 | 8.5 | 1064.8 | n/a  | n/a      | C18 H19 O3 Na S2 Cl |

<sup>1</sup>H spectra of **4n**.

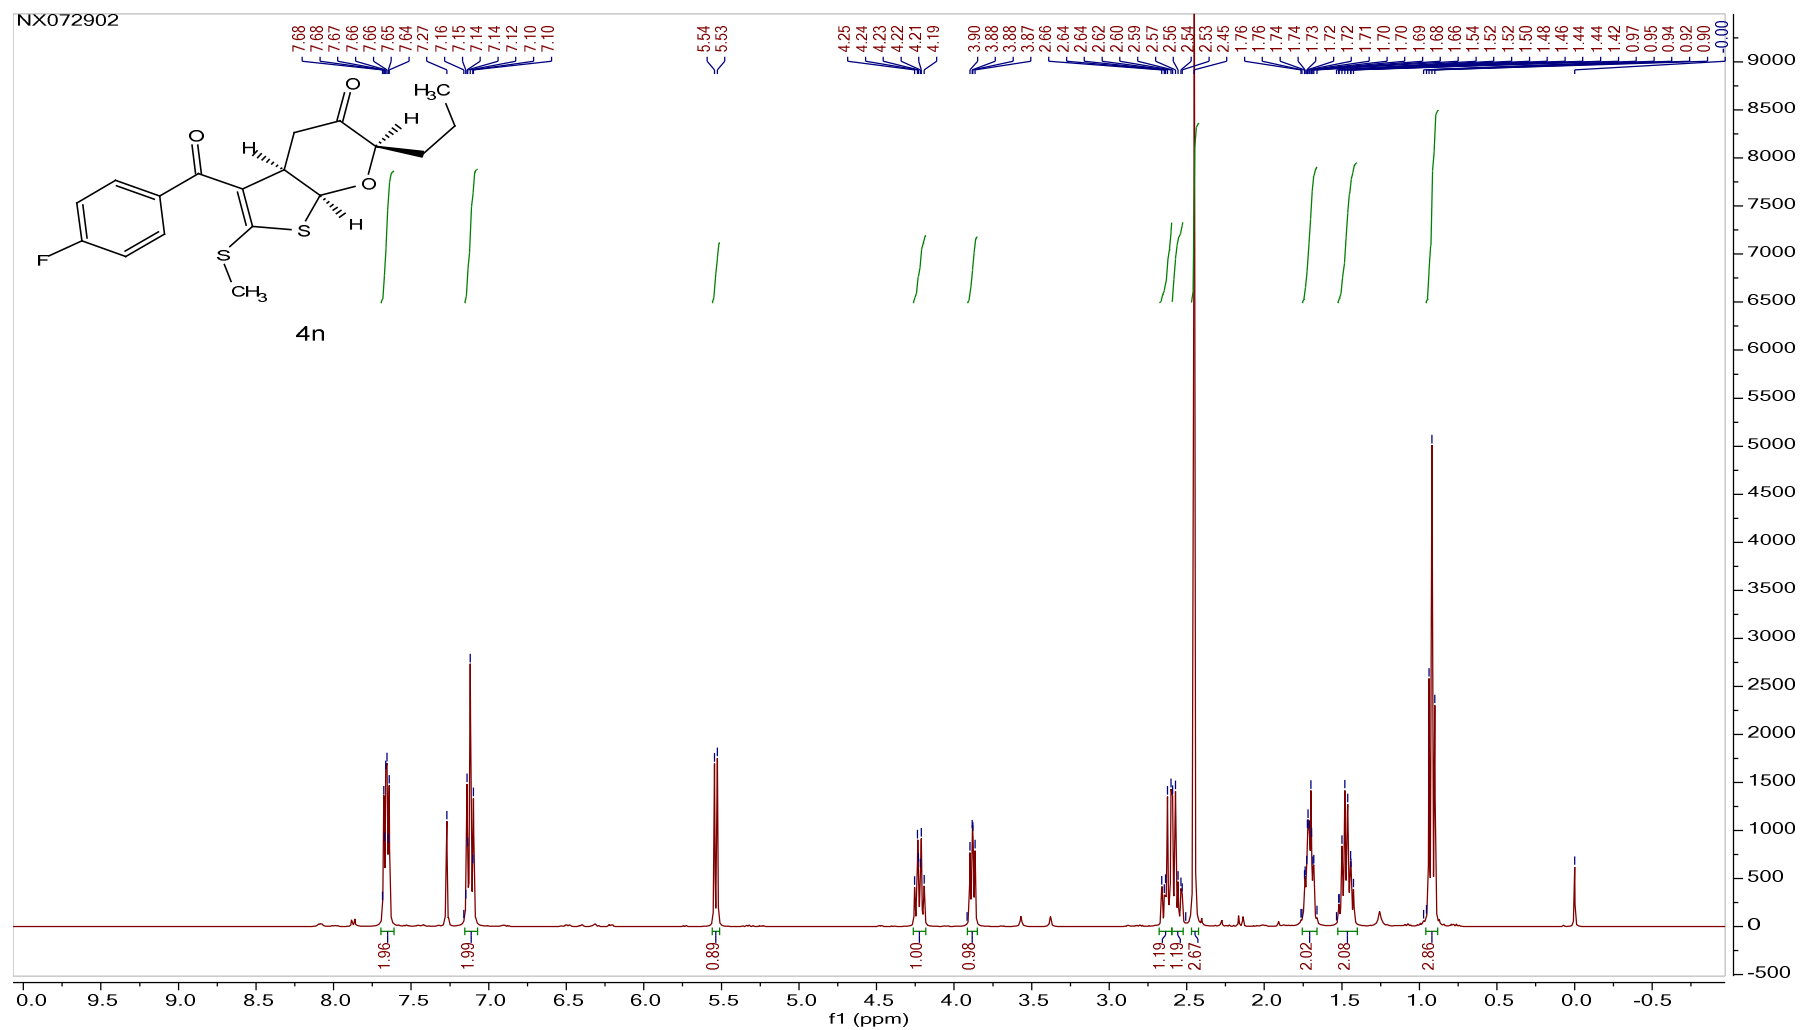

<sup>13</sup>C spectra of **4n**.

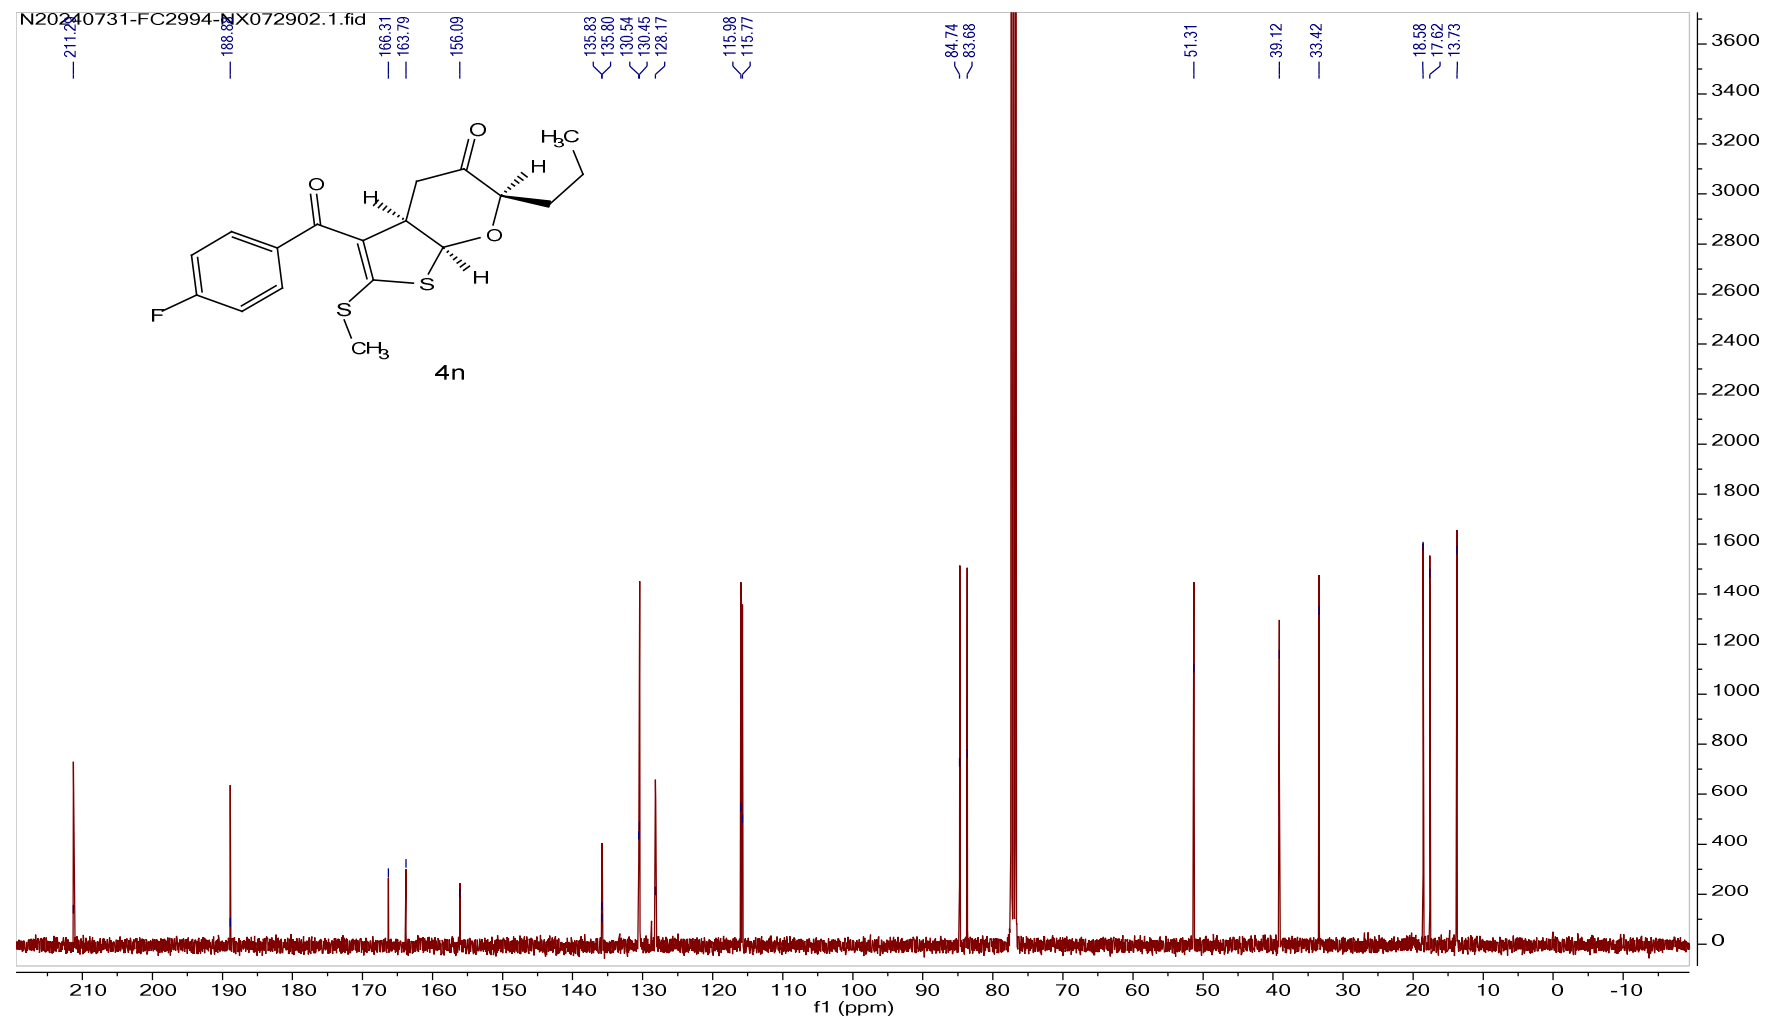

HRMS of 4n.

### Single Mass Analysis

Tolerance = 5.0 mDa / DBE: min = -1.5, max = 50.0

Element prediction: Off

Number of isotope peaks used for i-FIT = 3

Monoisotopic Mass, Even Electron Ions

2927 formula(e) evaluated with 1 results within limits (up to 50 best isotopic matches for each mass)

Elements Used:

C: 18-18 H: 19-19 N: 0-100 O: 0-100 Na: 0-4 S: 1-4 F: 1-1

29

240910-5-647-1-4O 18 (0.131)

1: TOF MS ES+  
4.05e+005

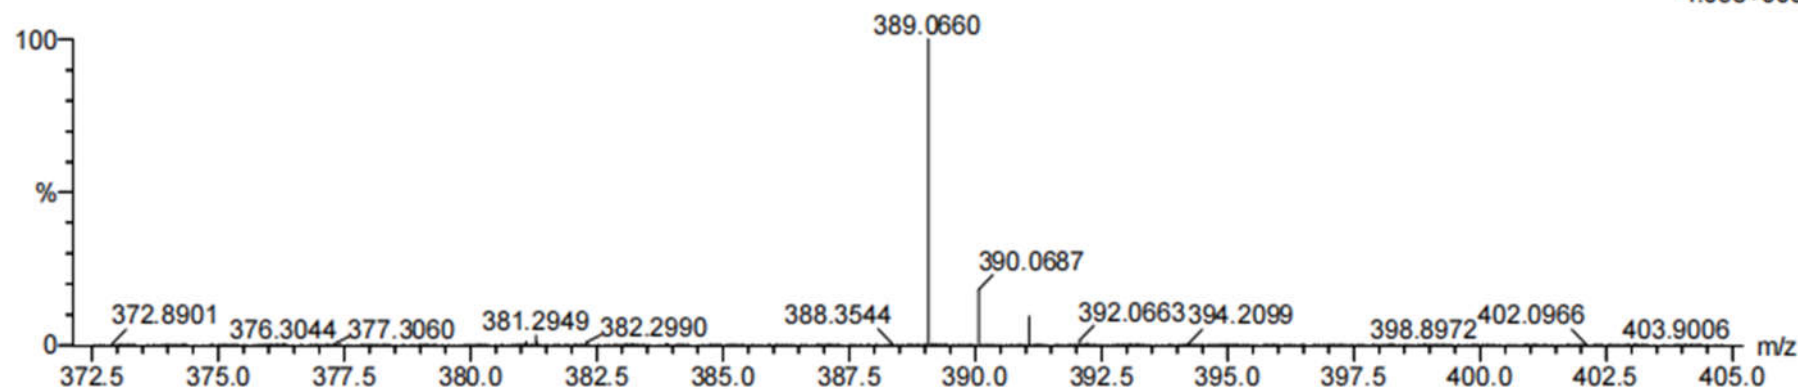

Minimum: -1.5  
Maximum: 5.0 10.0 50.0

| Mass     | Calc. Mass | mDa | PPM | DBE | i-FIT | Norm | Conf(%) | Formula            |
|----------|------------|-----|-----|-----|-------|------|---------|--------------------|
| 389.0660 | 389.0657   | 0.3 | 0.8 | 8.5 | 716.3 | n/a  | n/a     | C18 H19 O3 Na S2 F |

<sup>1</sup>H spectra of **5a**.

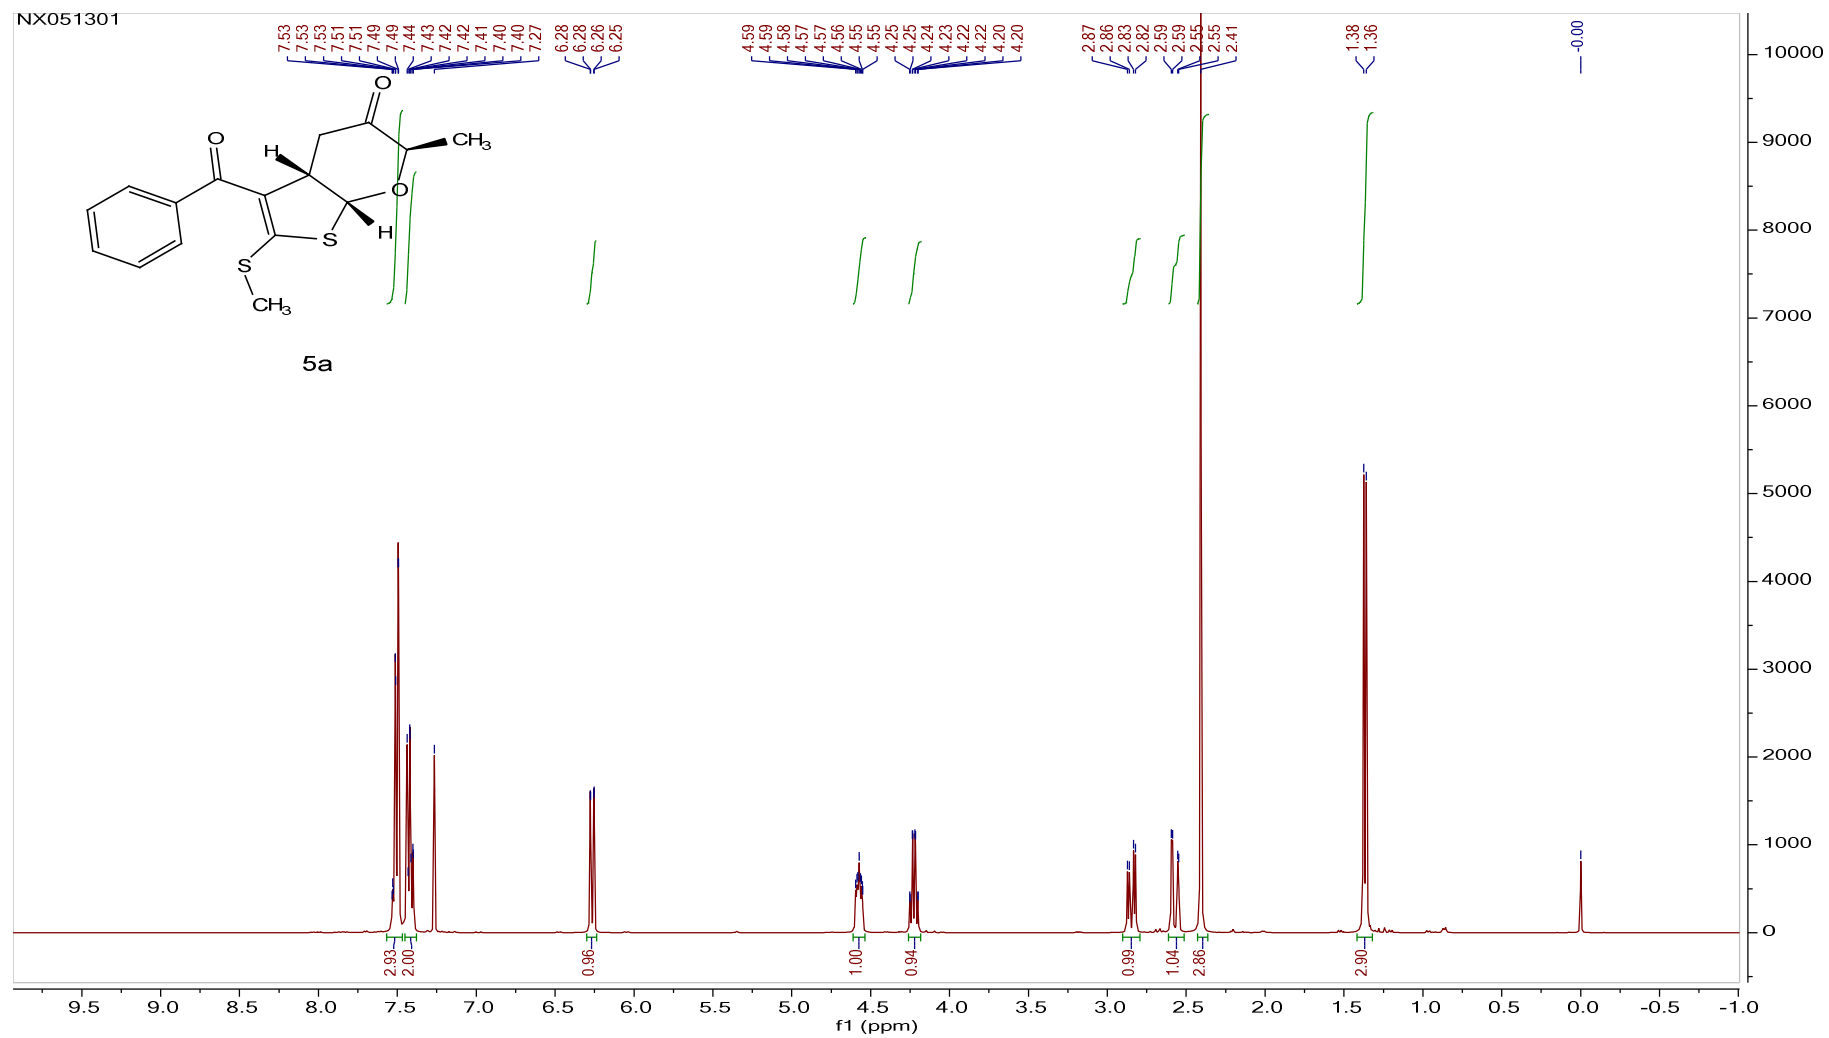



<sup>13</sup>C spectra of **5a**.

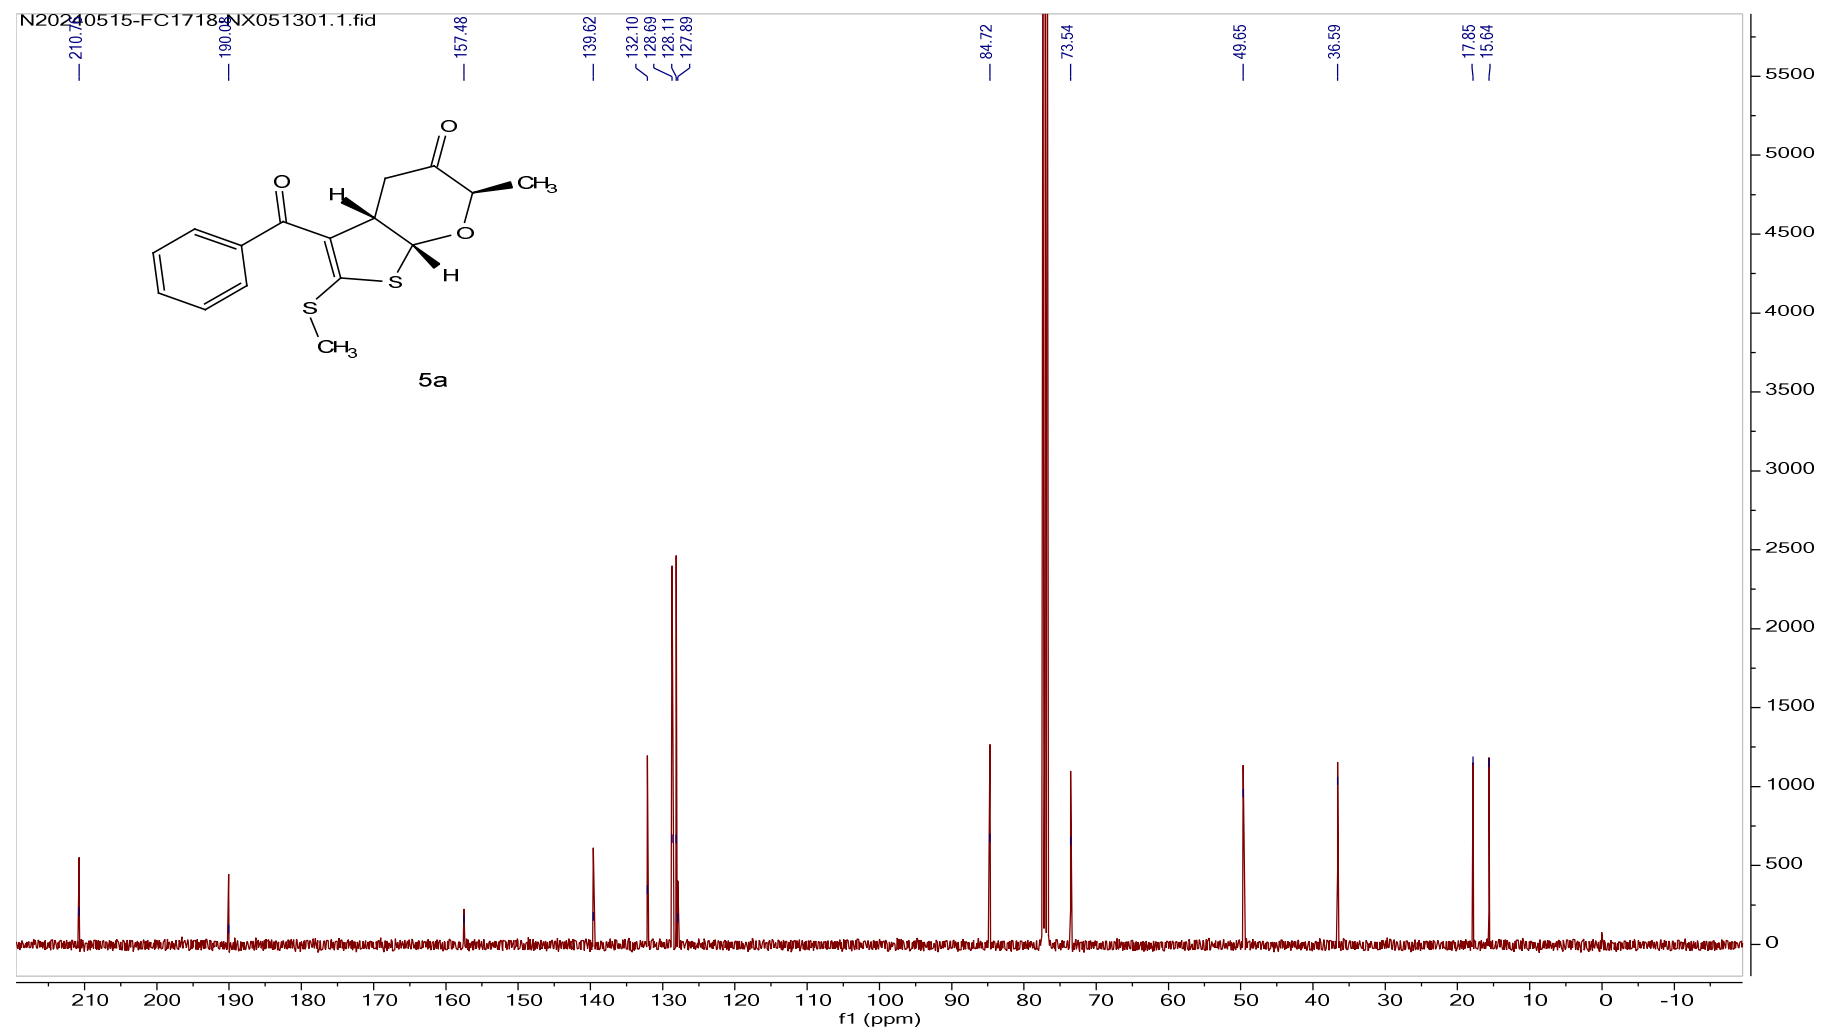

NOSEY spectra of **5a**.

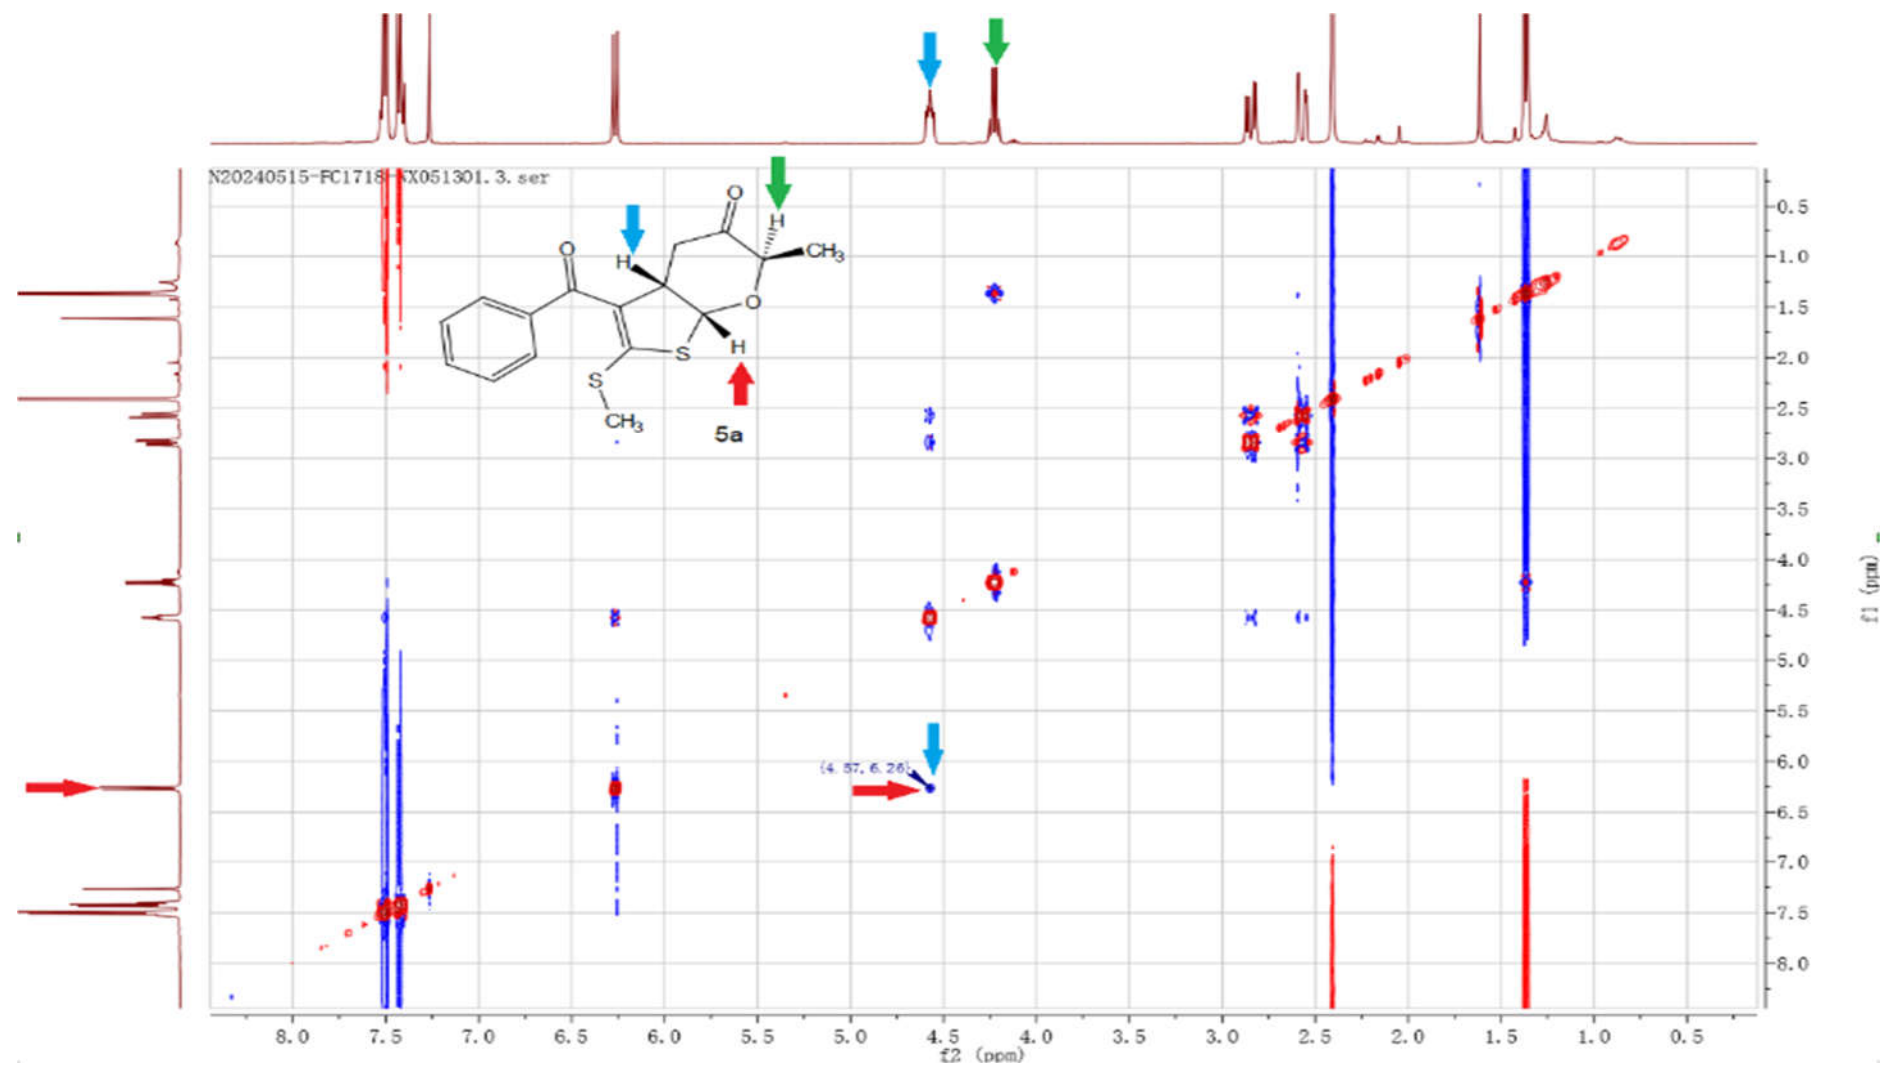

HRMS of 5a.

### Single Mass Analysis

Tolerance = 5.0 mDa / DBE: min = -1.5, max = 50.0

Element prediction: Off

Number of isotope peaks used for i-FIT = 3

Monoisotopic Mass, Even Electron Ions

2354 formula(e) evaluated with 1 results within limits (up to 50 best isotopic matches for each mass)

Elements Used:

C: 16-16 H: 16-16 N: 0-100 O: 0-100 Na: 0-4 S: 1-4

29

240910-5-647-1-5A 17 (0.126)

1: TOF MS ES+  
1.11e+006

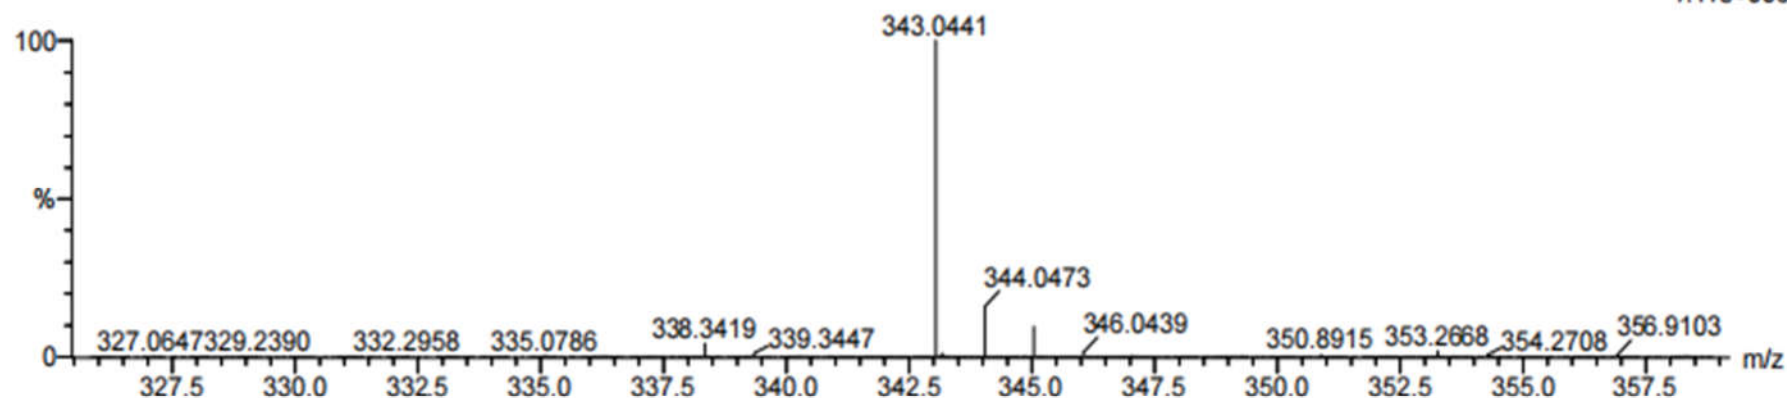

Minimum: -1.5  
Maximum: 5.0 10.0 50.0

| Mass     | Calc. Mass | mDa | PPM | DBE | i-FIT | Norm | Conf (%) | Formula          |
|----------|------------|-----|-----|-----|-------|------|----------|------------------|
| 343.0441 | 343.0439   | 0.2 | 0.6 | 8.5 | 978.3 | n/a  | n/a      | C16 H16 O3 Na S2 |

<sup>1</sup>H spectra of **5b**.

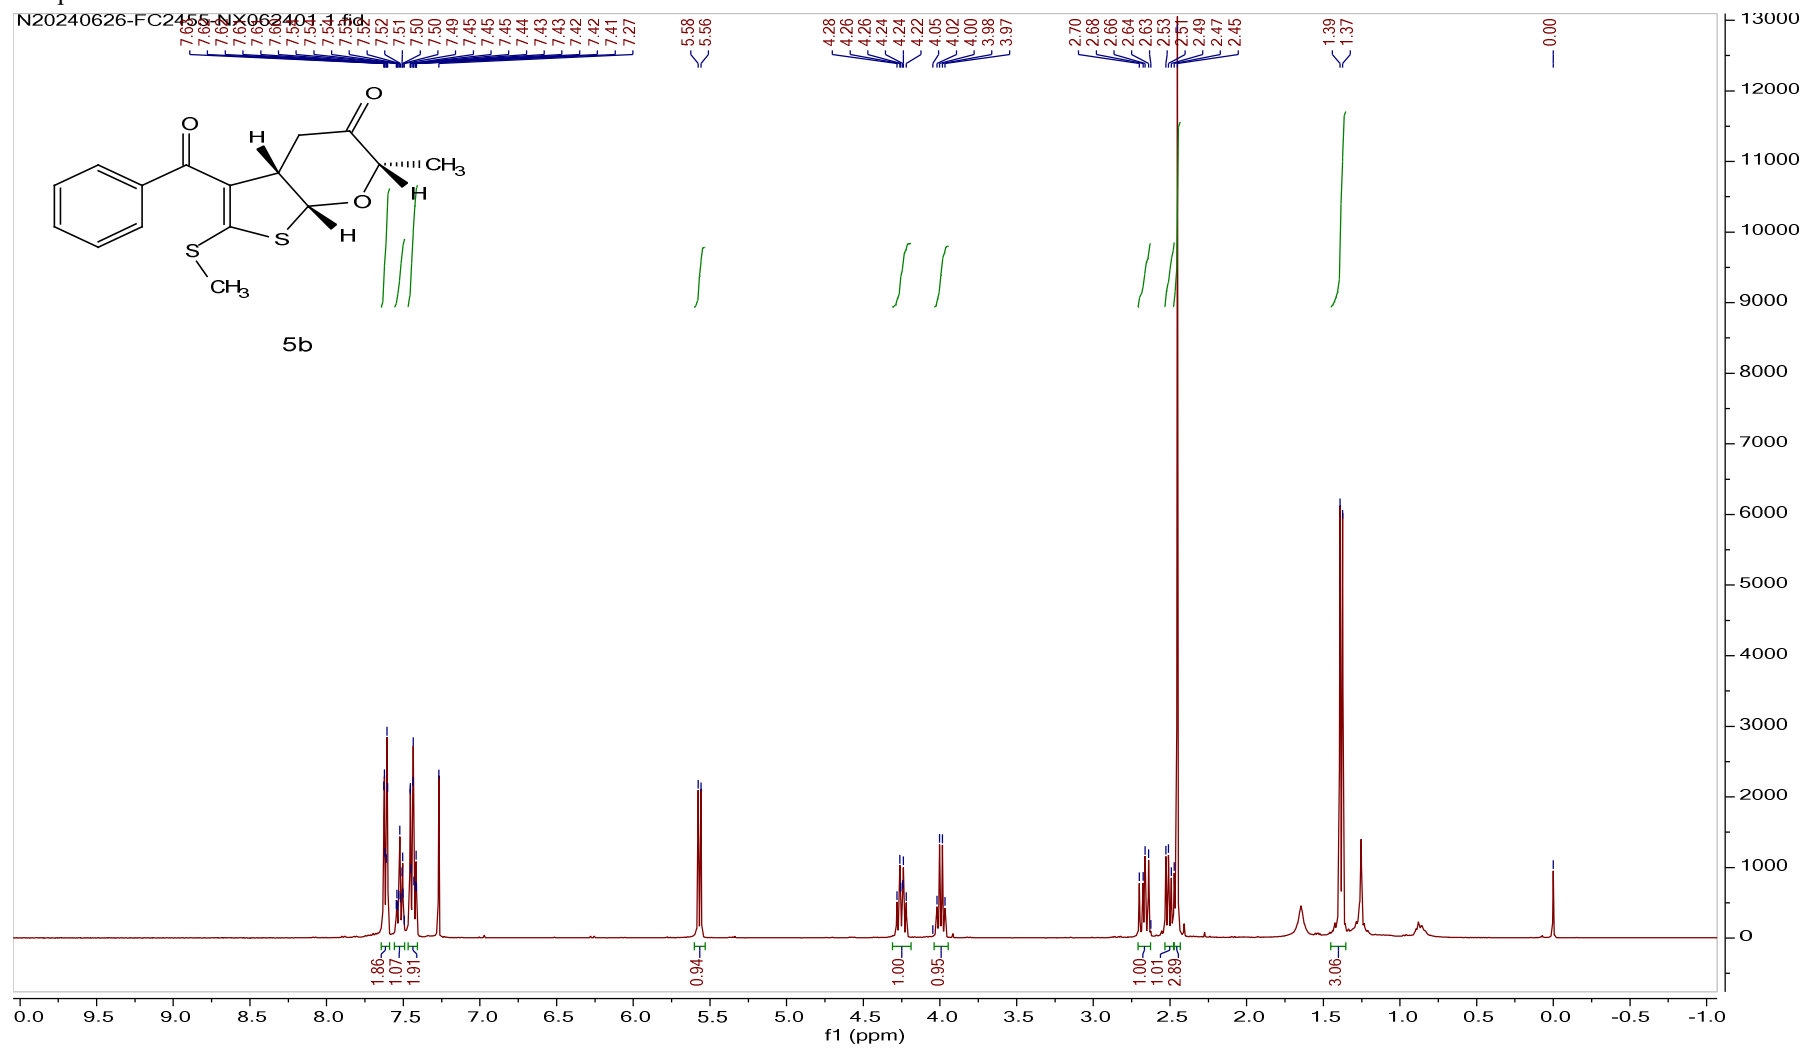

<sup>13</sup>C spectra of **5b**.

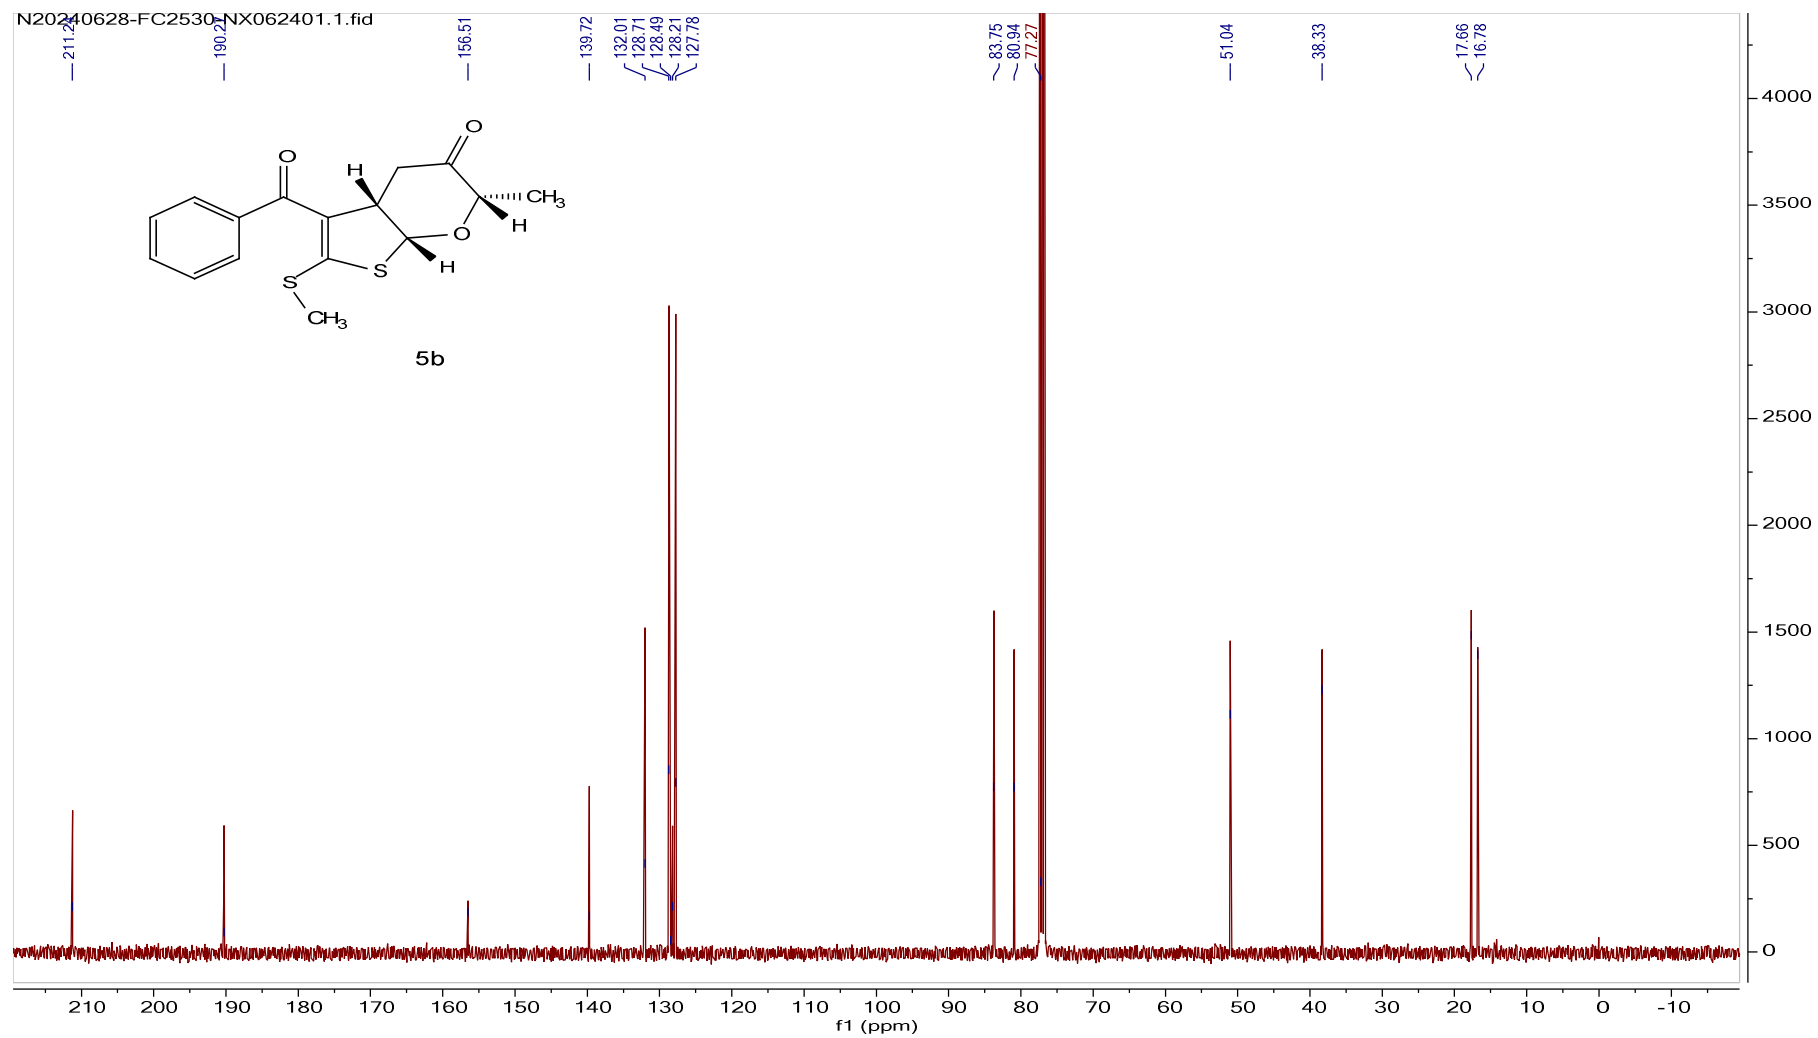

NOESY spectra of **5b**.

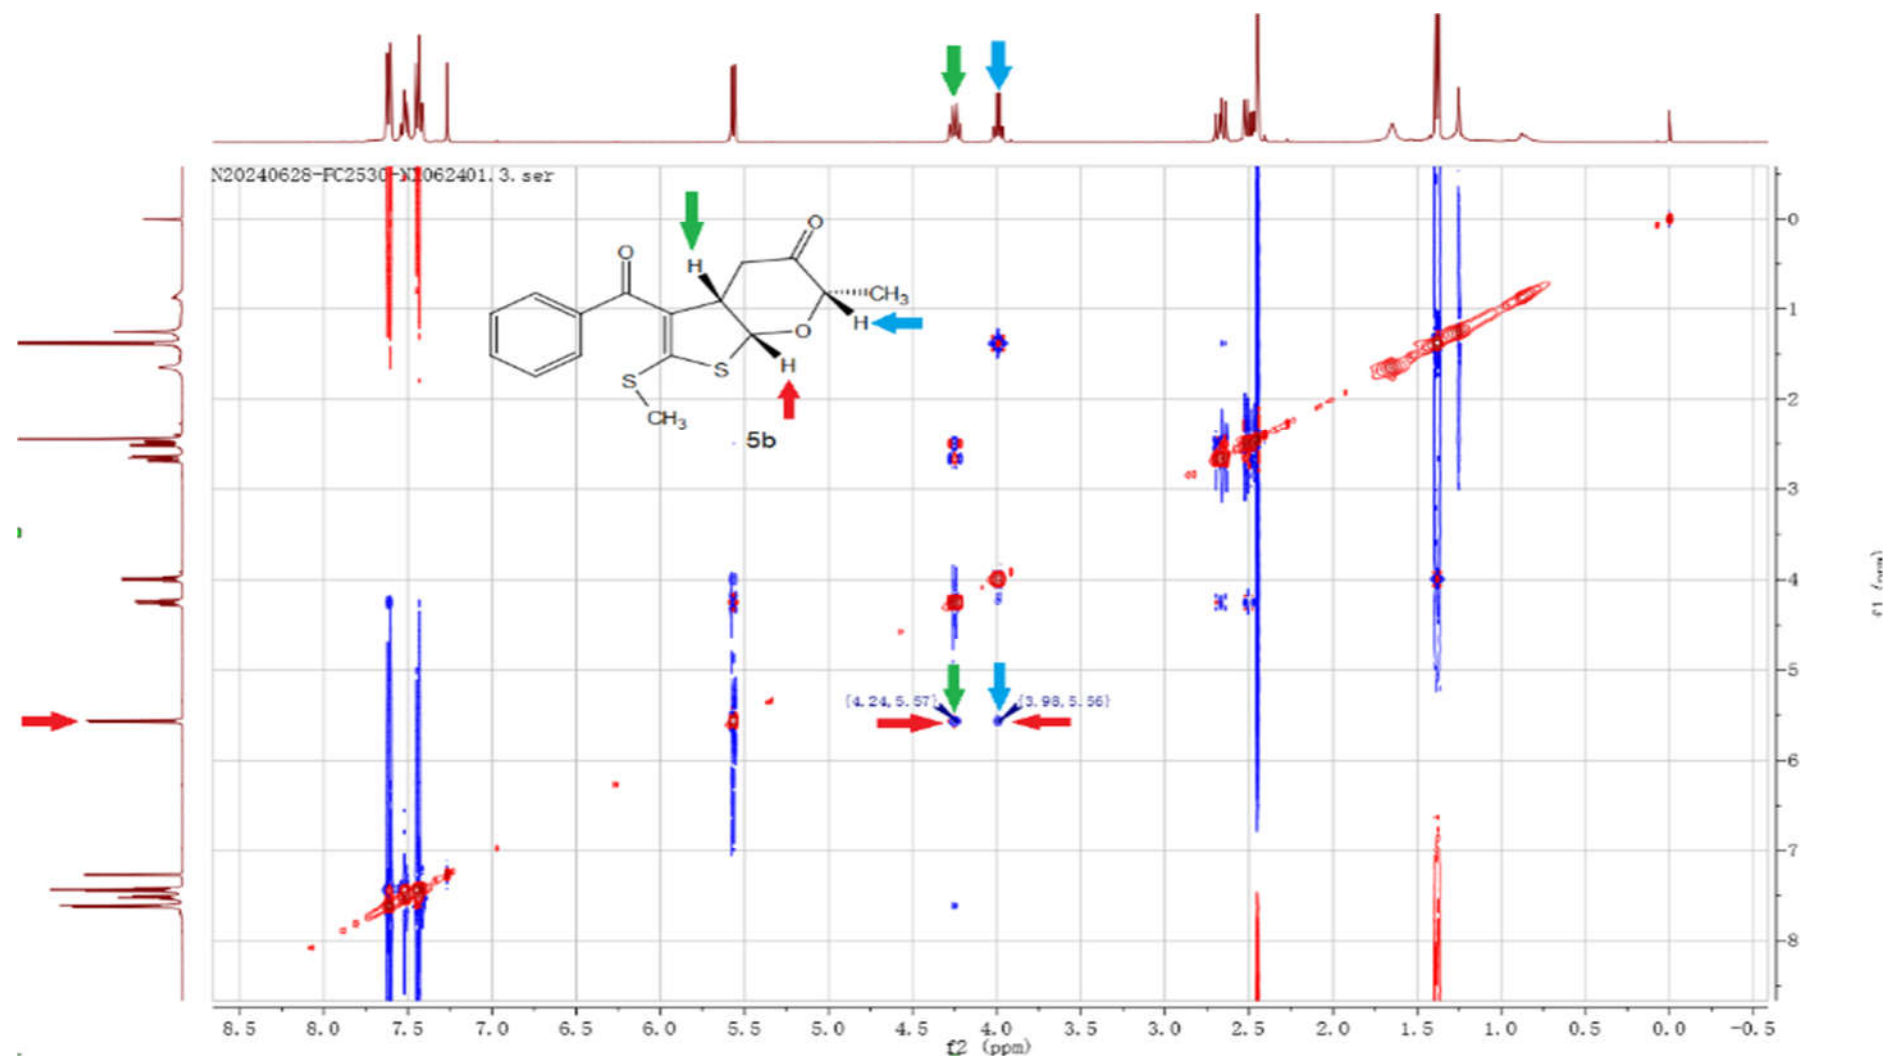

HRMS of 5b.

### Single Mass Analysis

Tolerance = 5.0 mDa / DBE: min = -1.5, max = 50.0

Element prediction: Off

Number of isotope peaks used for i-FIT = 3

Monoisotopic Mass, Even Electron Ions

2354 formula(e) evaluated with 1 results within limits (up to 50 best isotopic matches for each mass)

Elements Used:

C: 16-16 H: 16-16 N: 0-100 O: 0-100 Na: 0-4 S: 1-4

29

240910-5-647-1-5B 18 (0.131)

1: TOF MS ES+  
9.47e+005

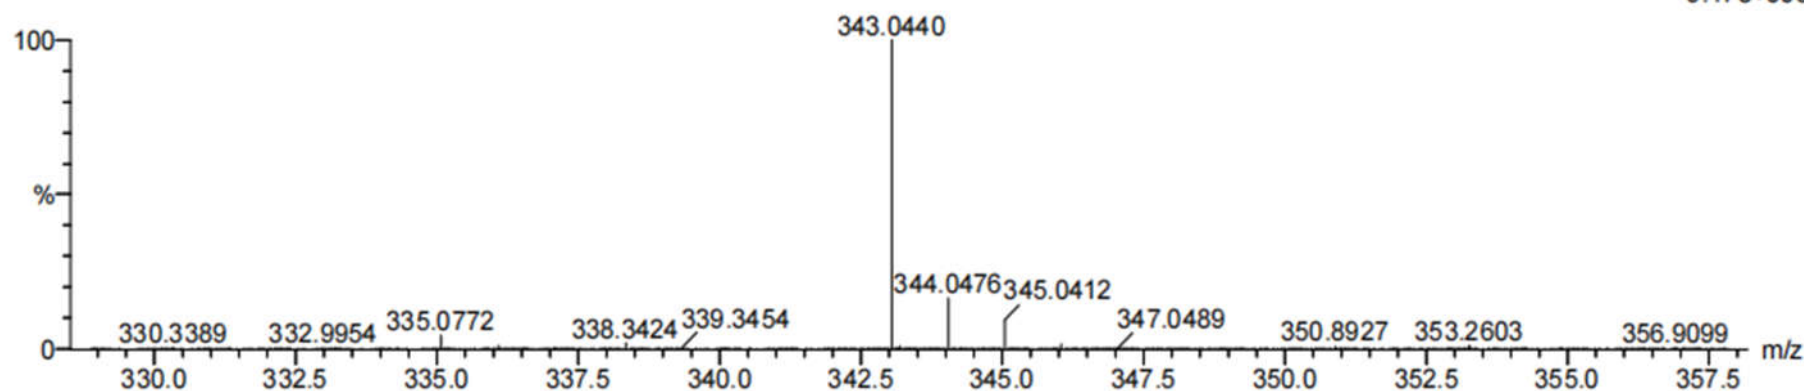

Minimum: -1.5  
Maximum: 5.0 10.0 50.0

| Mass     | Calc. Mass | mDa | PPM | DBE | i-FIT | Norm | Conf(%) | Formula          |
|----------|------------|-----|-----|-----|-------|------|---------|------------------|
| 343.0440 | 343.0439   | 0.1 | 0.3 | 8.5 | 985.3 | n/a  | n/a     | C16 H16 O3 Na S2 |

<sup>1</sup>H spectra of **5c**.

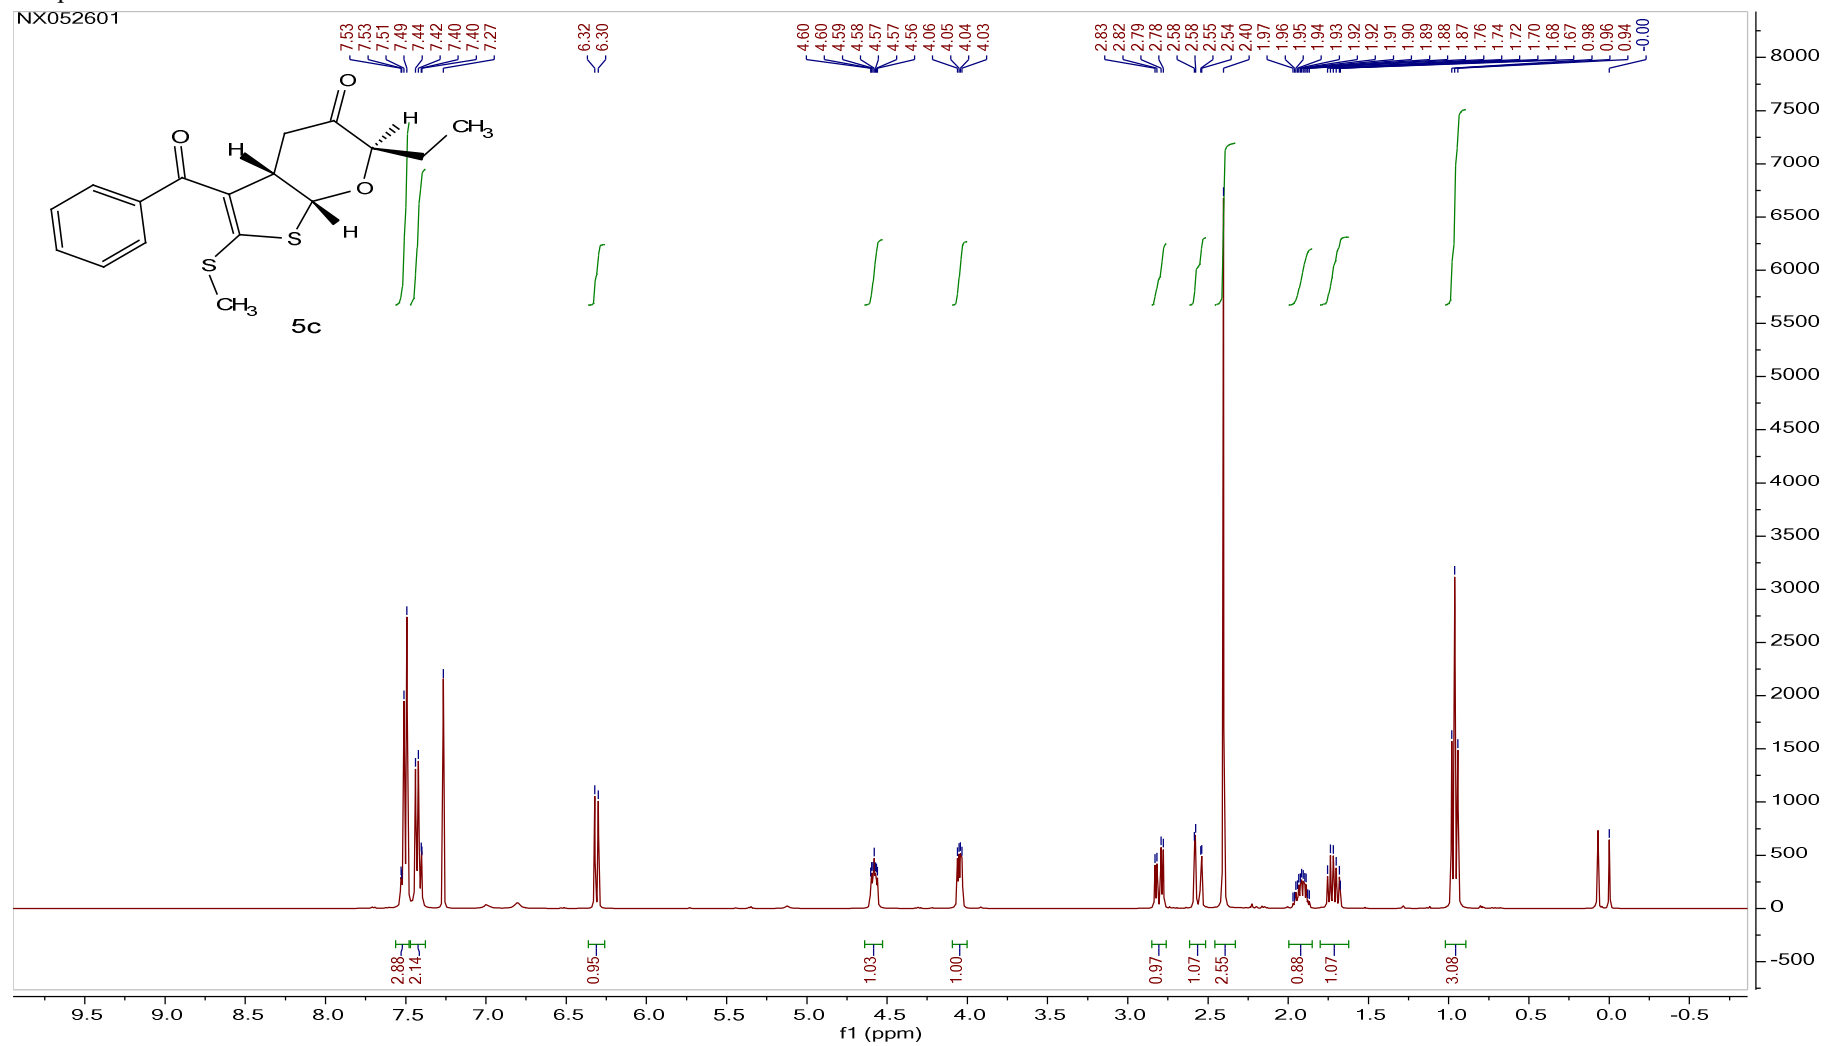



<sup>13</sup>C spectra of **5c**.

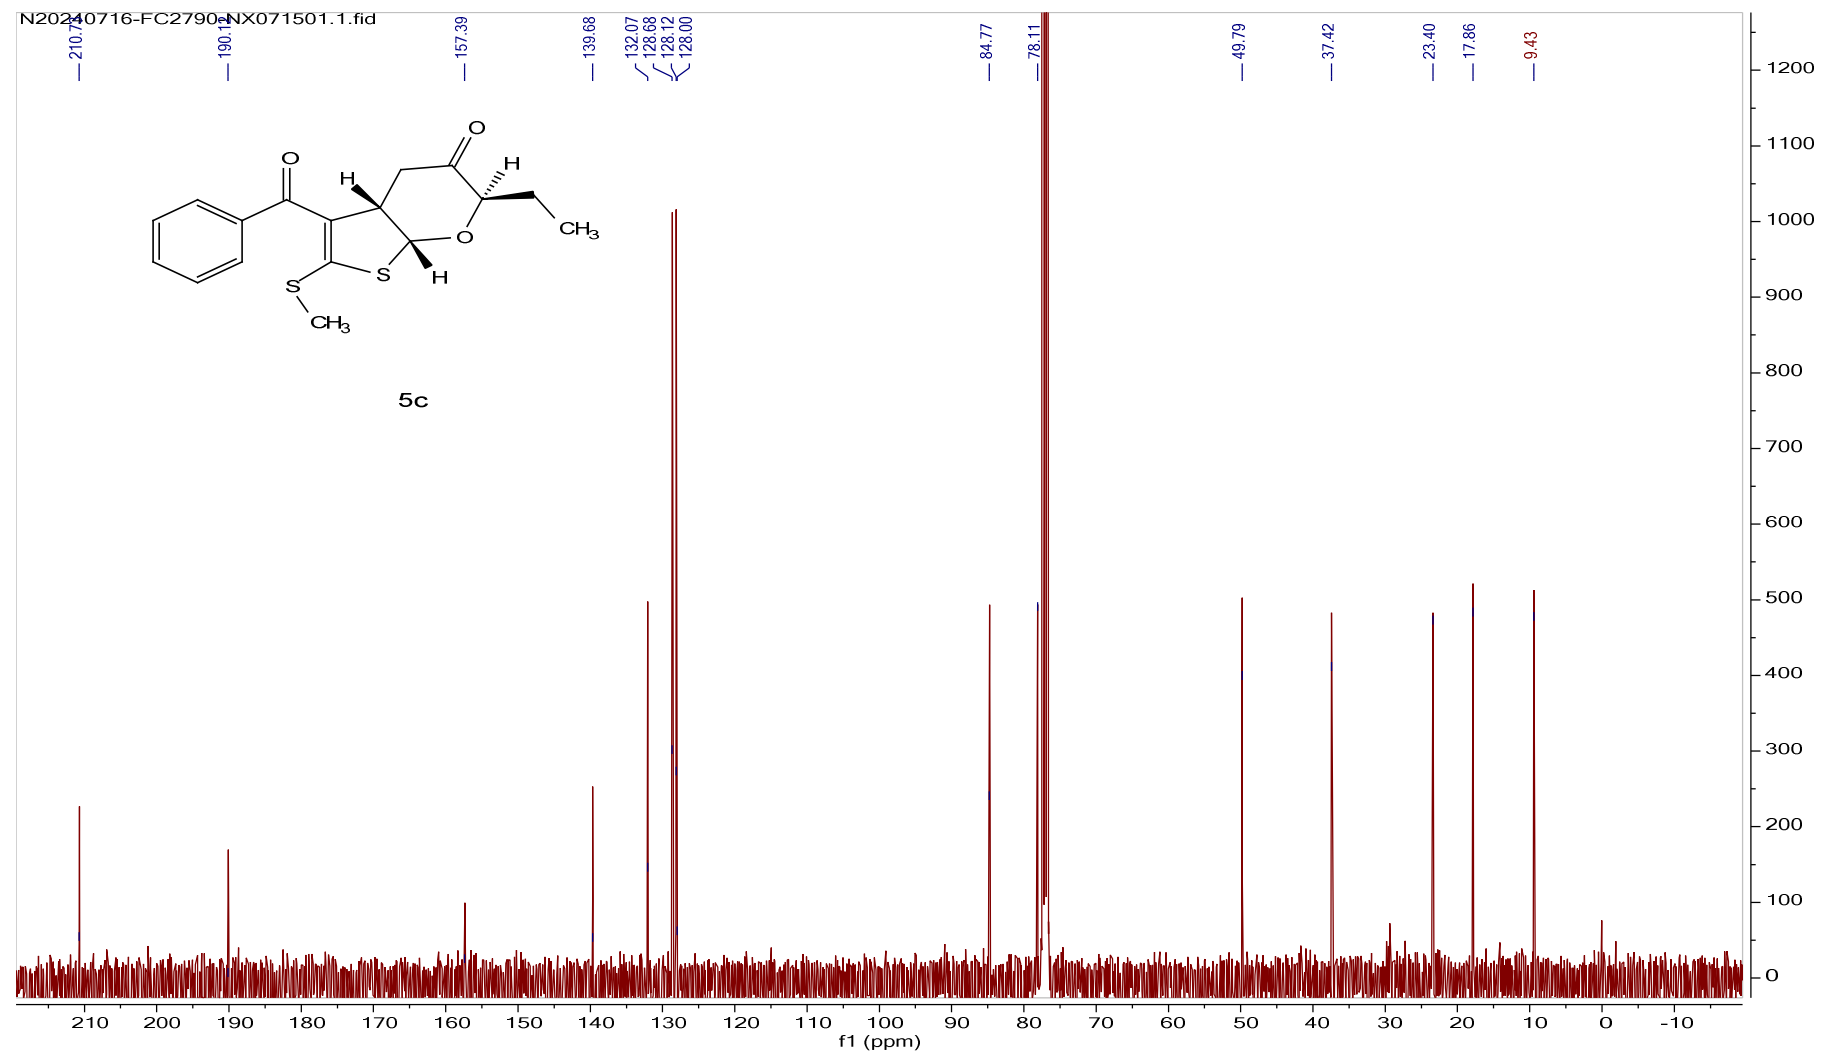

NOESY spectra of **5c**.

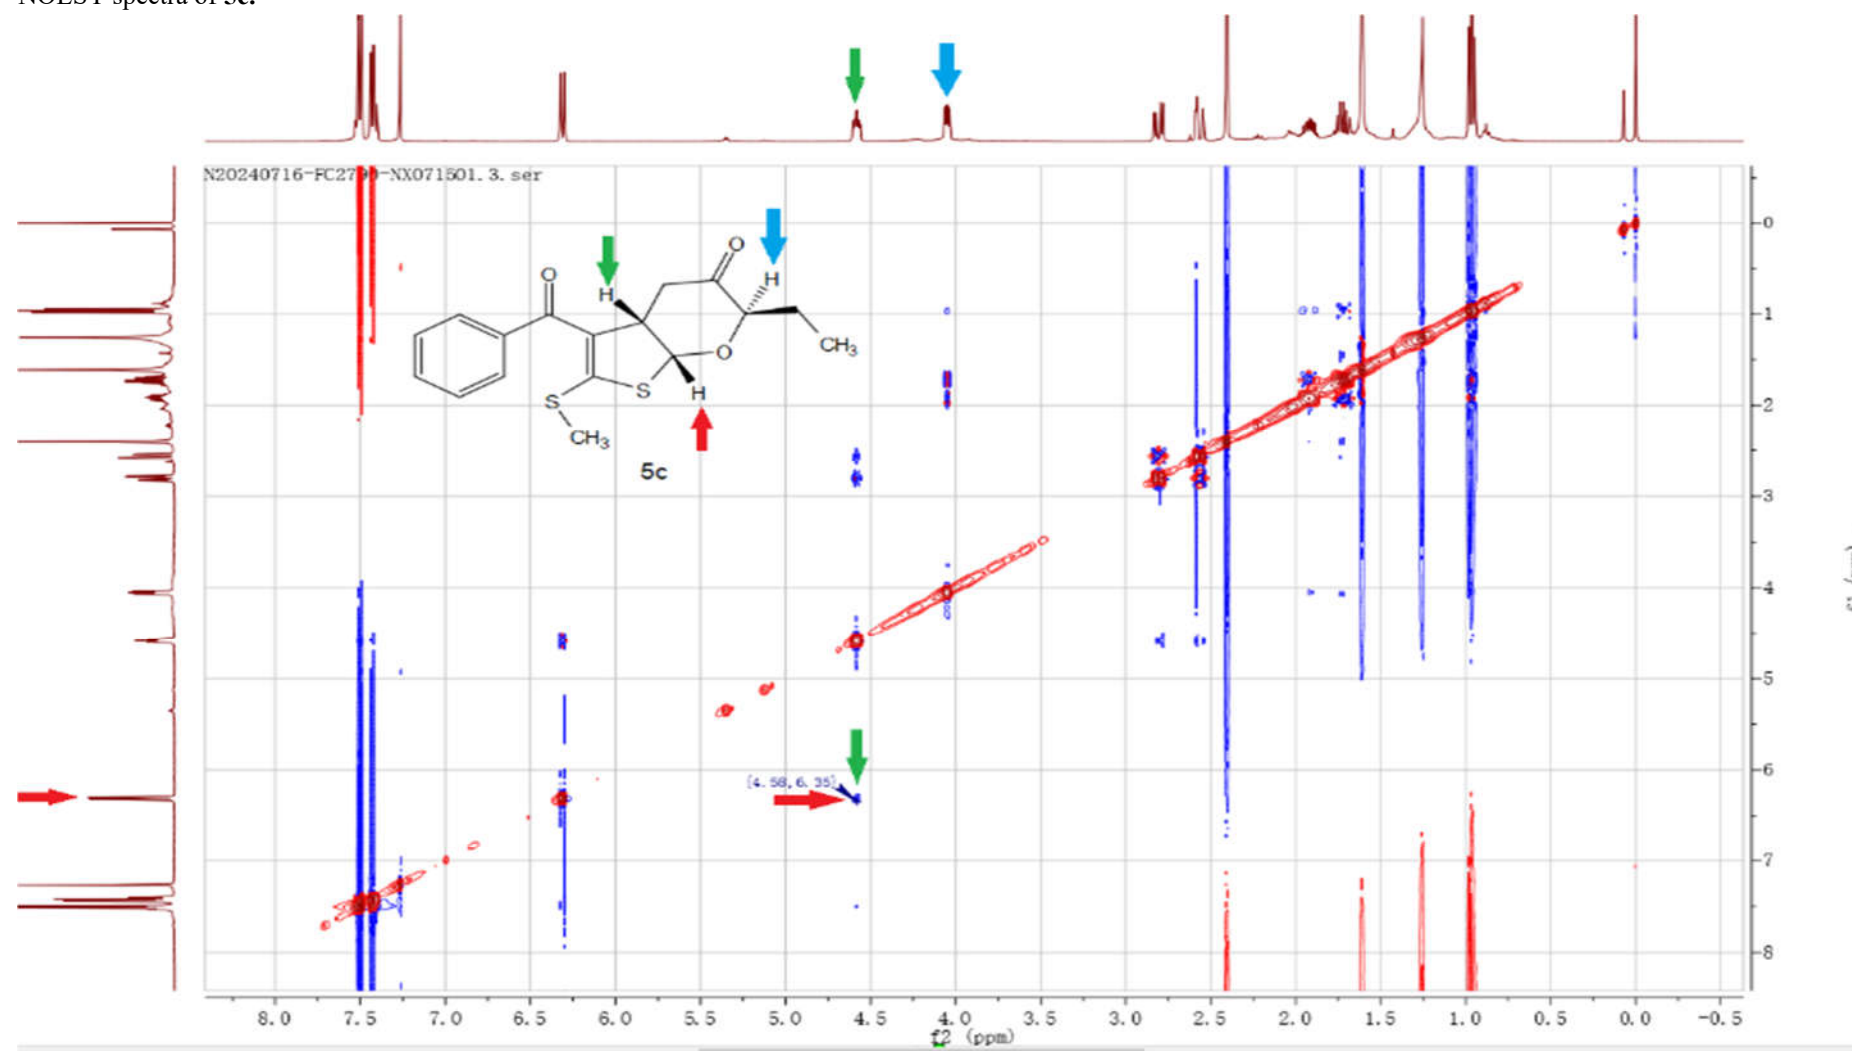

HRMS of 5c.

### Single Mass Analysis

Tolerance = 5.0 mDa / DBE: min = -1.5, max = 50.0

Element prediction: Off

Number of isotope peaks used for i-FIT = 3

Monoisotopic Mass, Even Electron Ions

2640 formula(e) evaluated with 1 results within limits (up to 50 best isotopic matches for each mass)

Elements Used:

C: 17-17 H: 18-18 N: 0-100 O: 0-100 Na: 0-4 S: 1-4

29

240910-5-647-1-5C 21 (0.147)

1: TOF MS ES+  
9.28e+005

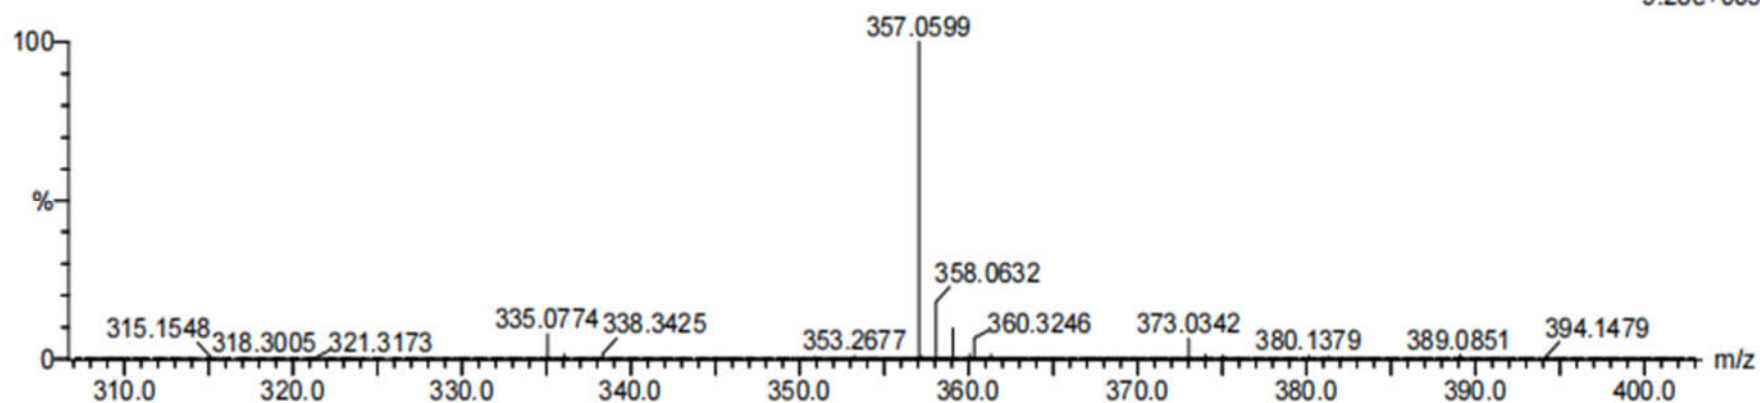

Minimum: -1.5

Maximum: 5.0 10.0 50.0

| Mass     | Calc. Mass | mDa | PPM | DBE | i-FIT | Norm | Conf (%) | Formula          |
|----------|------------|-----|-----|-----|-------|------|----------|------------------|
| 357.0599 | 357.0595   | 0.4 | 1.1 | 8.5 | 960.6 | n/a  | n/a      | C17 H18 O3 Na S2 |

<sup>1</sup>H spectra of **5d**.

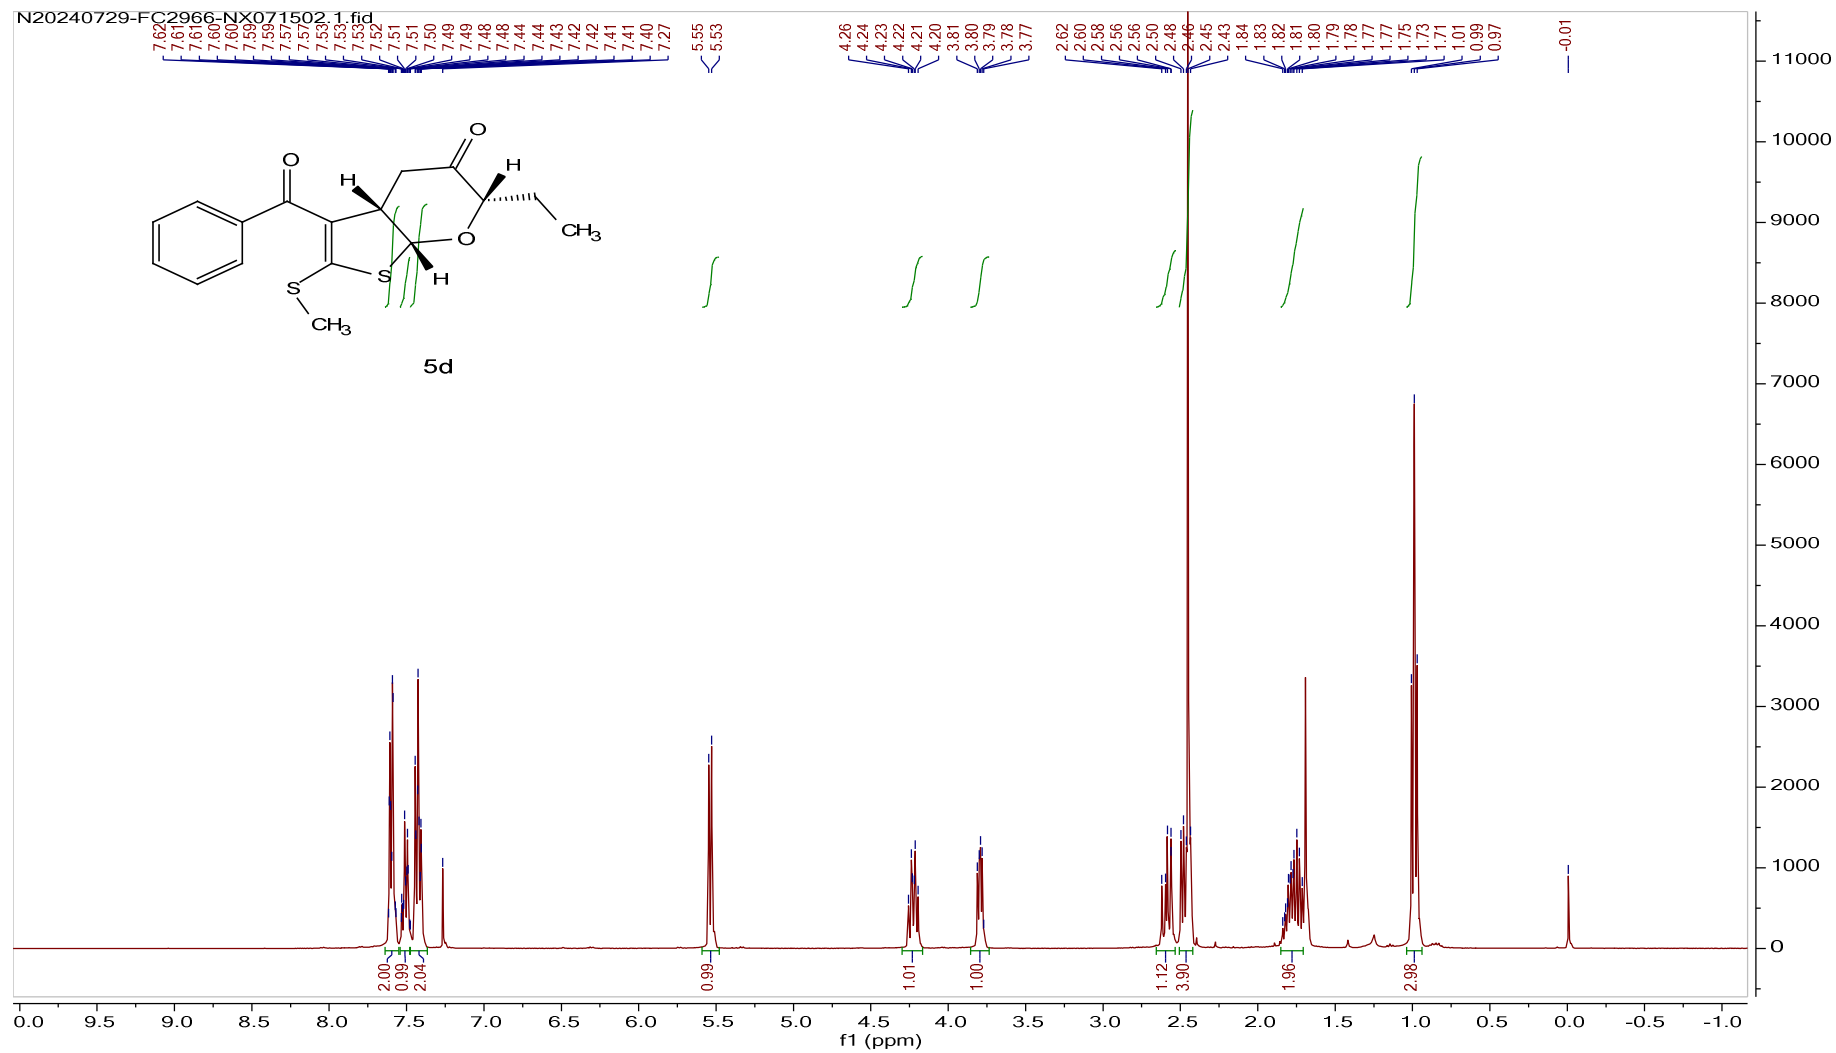

<sup>13</sup>C spectra of **5d**.

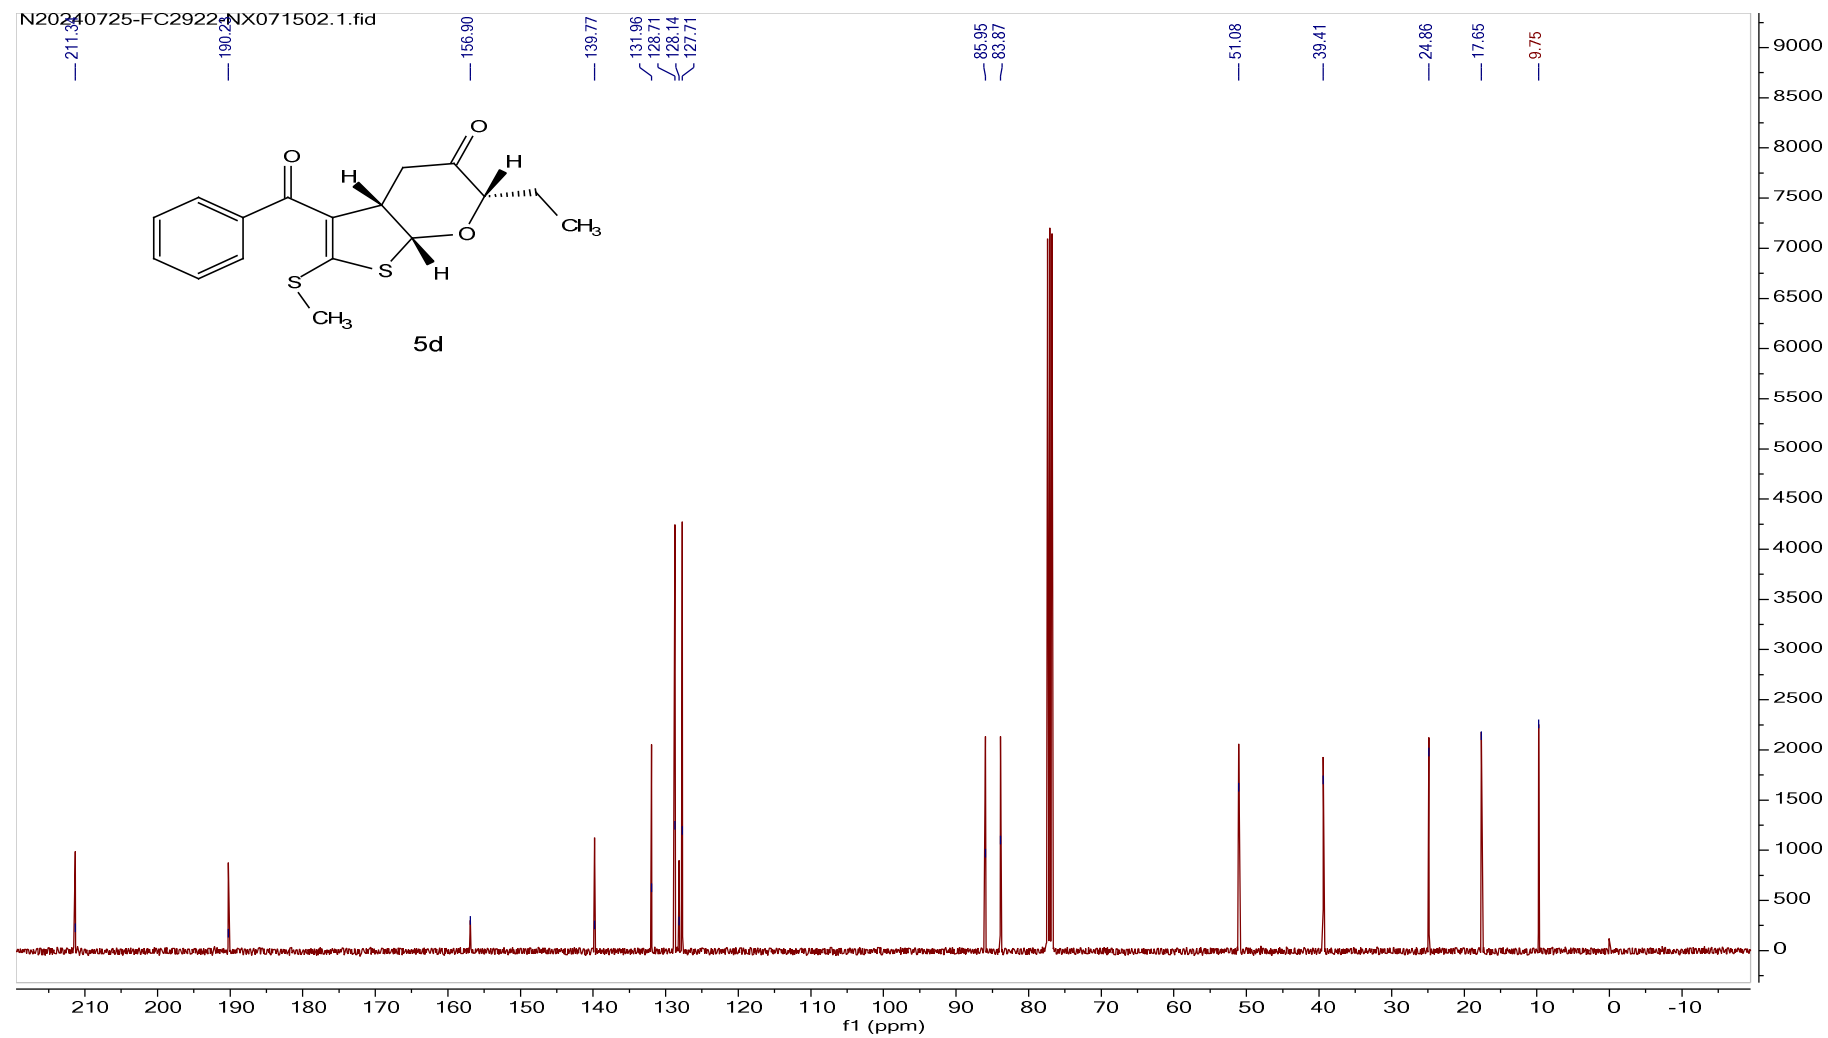

NOESY spectra of **5d**.

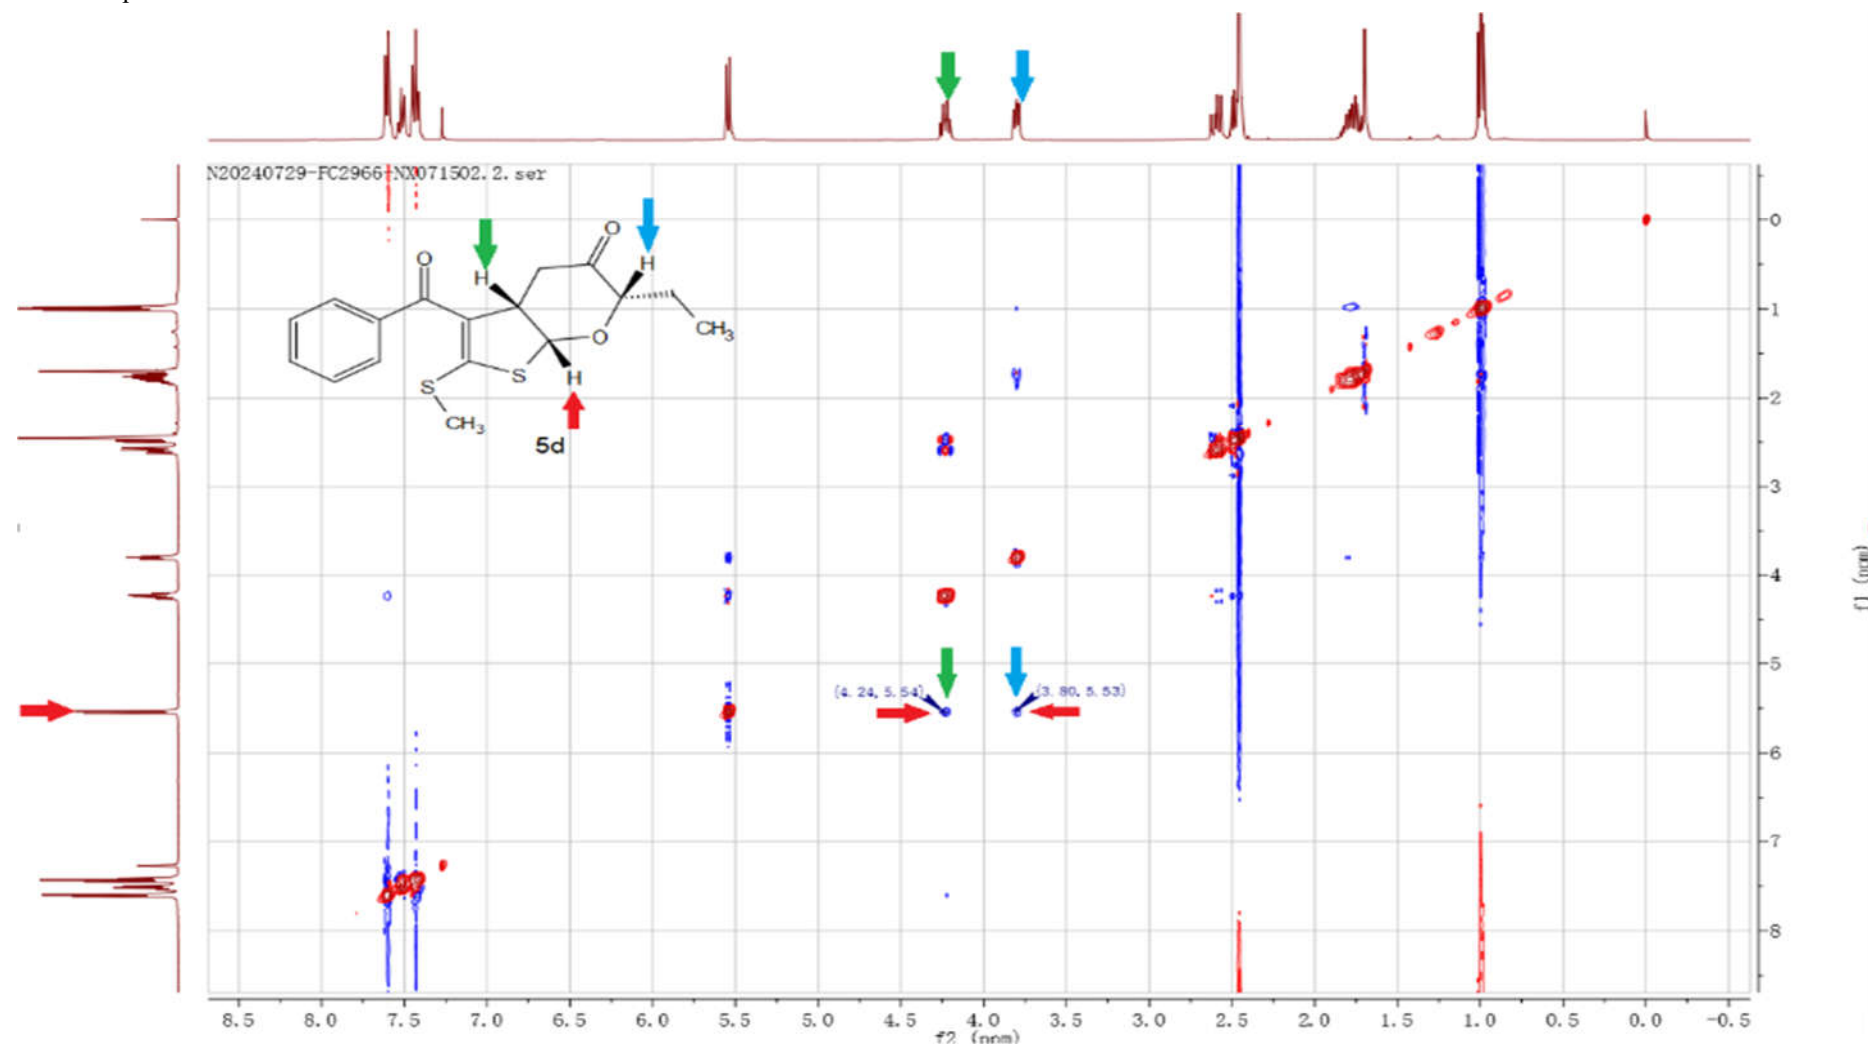

HRMS of 5d.

### Single Mass Analysis

Tolerance = 5.0 mDa / DBE: min = -1.5, max = 50.0

Element prediction: Off

Number of isotope peaks used for i-FIT = 3

Monoisotopic Mass, Even Electron Ions

2640 formula(e) evaluated with 1 results within limits (up to 50 best isotopic matches for each mass)

Elements Used:

C: 17-17 H: 18-18 N: 0-100 O: 0-100 Na: 0-4 S: 1-4

29

240910-5-647-1-5D 15 (0.115)

1: TOF MS ES+  
2.27e+006

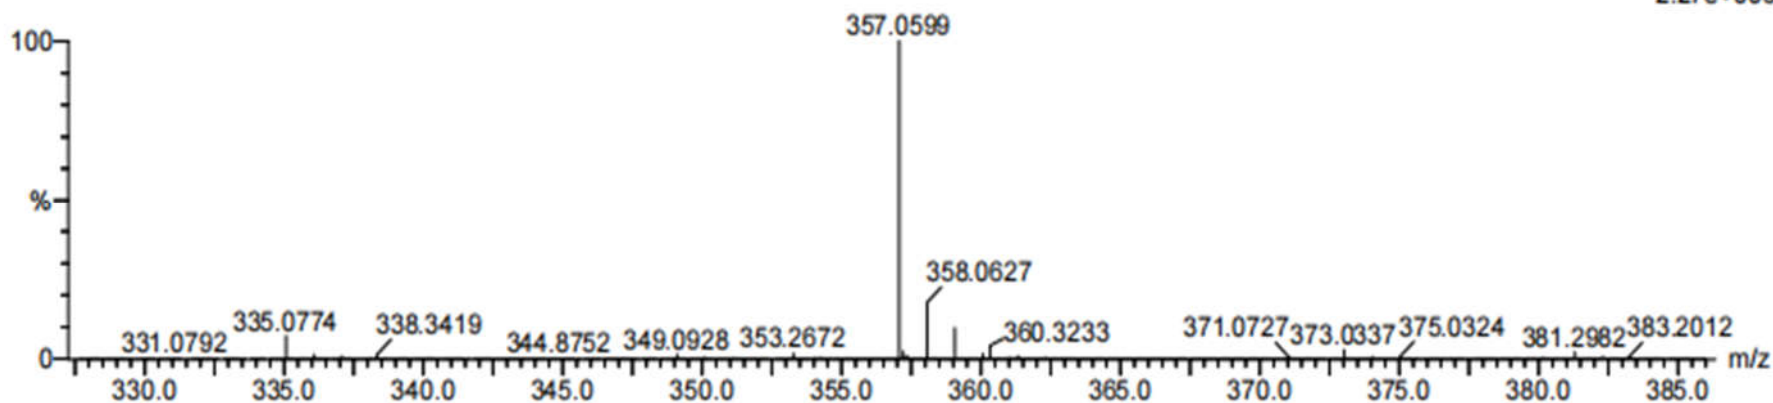

Minimum: -1.5

Maximum: 5.0 10.0 50.0

| Mass     | Calc. Mass | mDa | PPM | DBE | i-FIT  | Norm | Conf (%) | Formula          |
|----------|------------|-----|-----|-----|--------|------|----------|------------------|
| 357.0599 | 357.0595   | 0.4 | 1.1 | 8.5 | 1108.7 | n/a  | n/a      | C17 H18 O3 Na S2 |

<sup>1</sup>H spectra of **5e**.

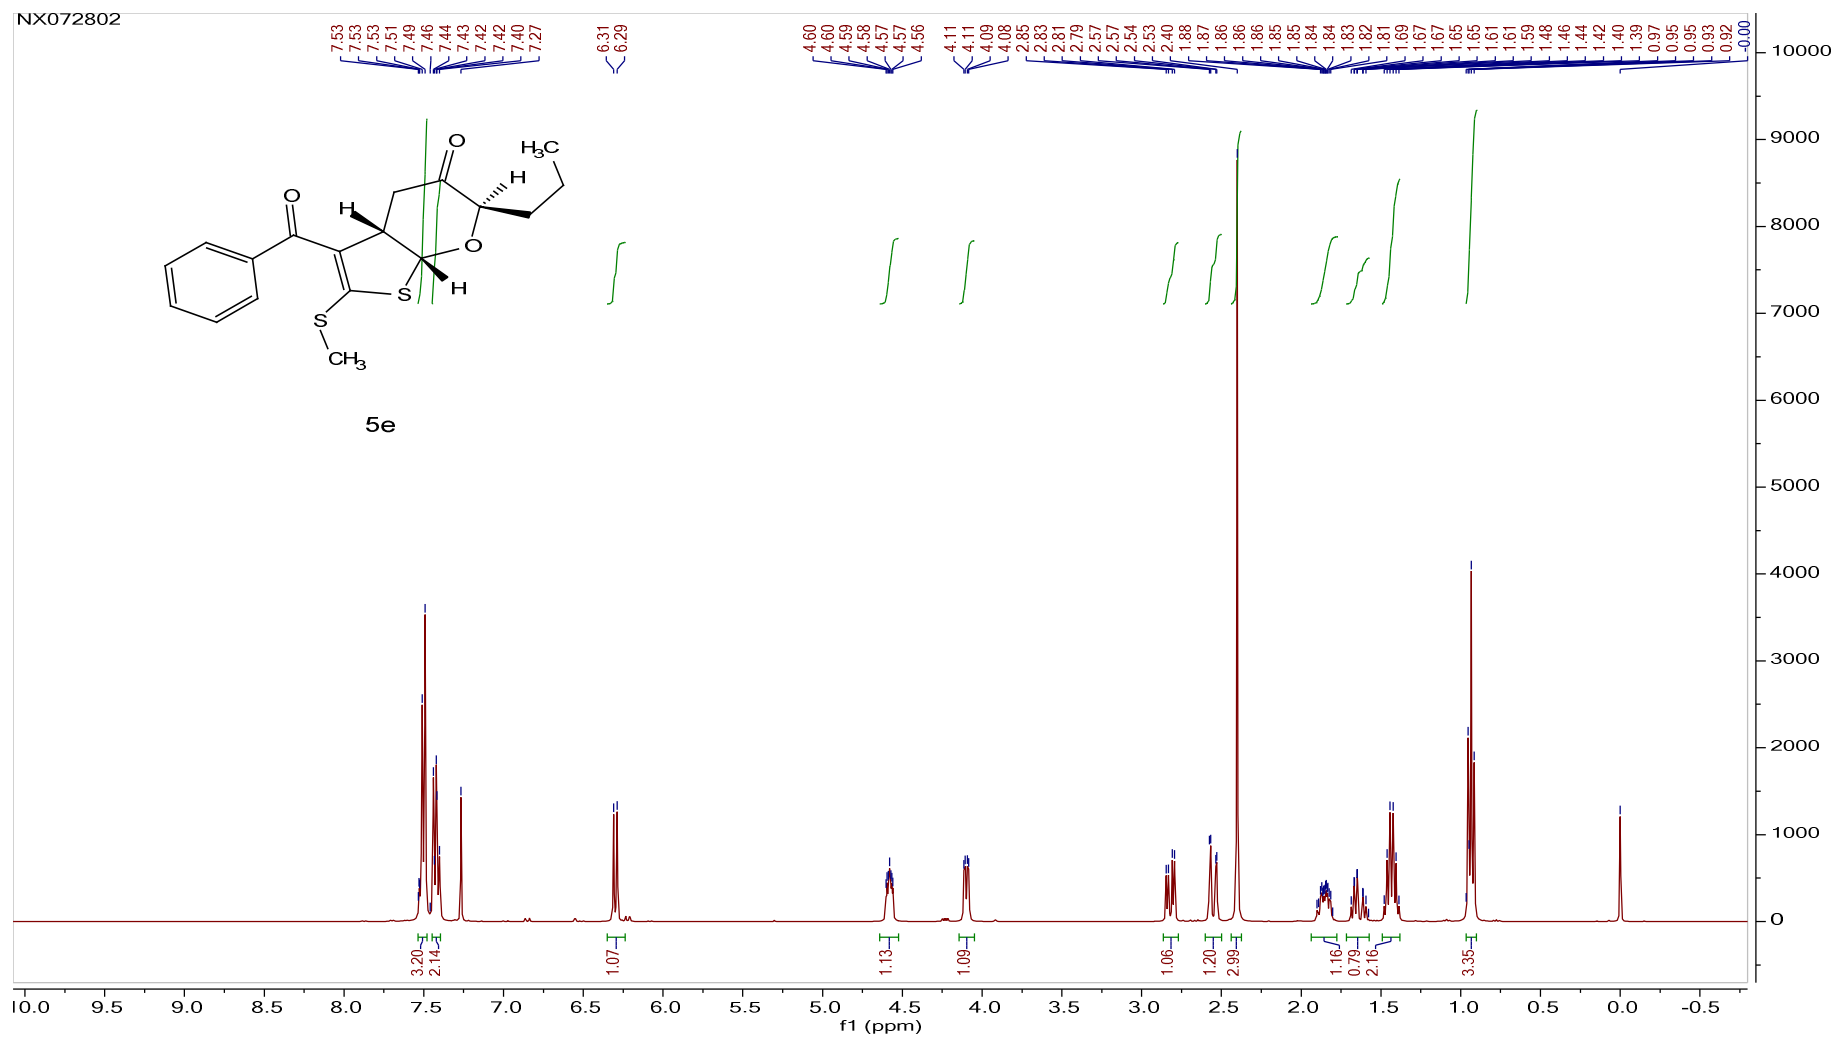



<sup>13</sup>C spectra of **5e**.

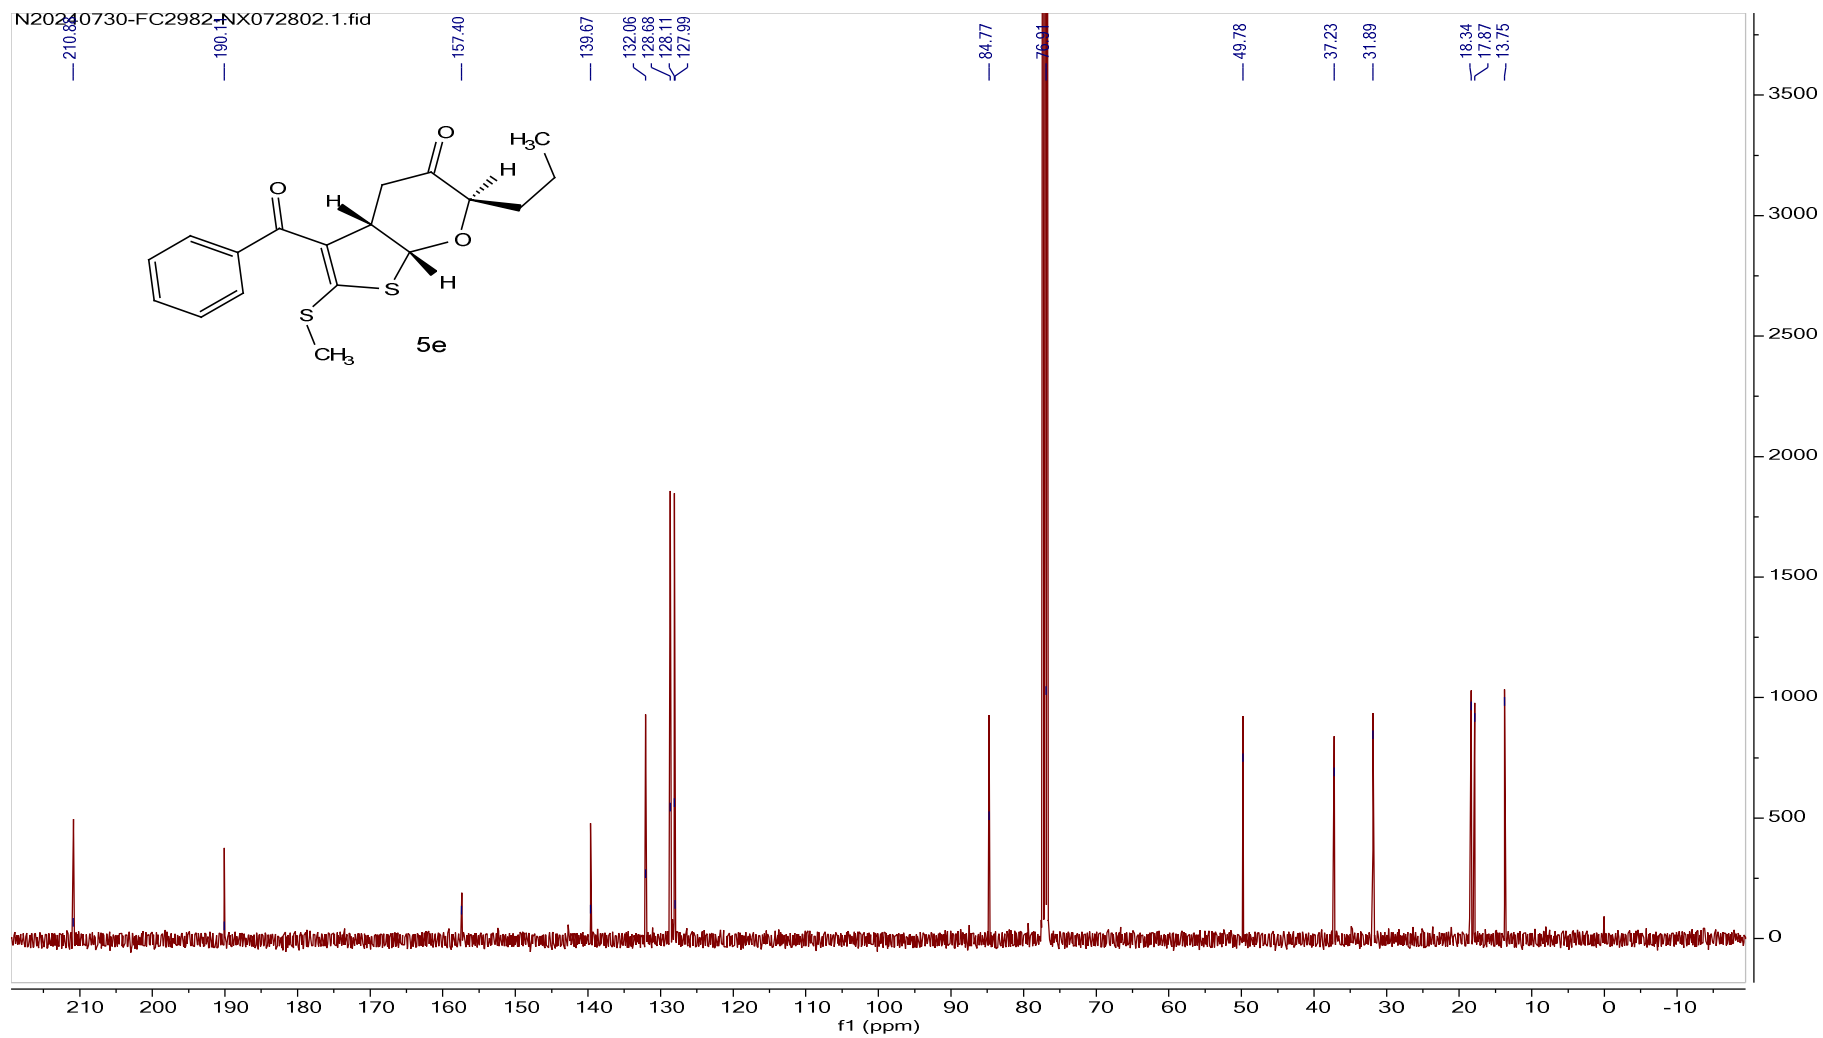

NOESY spectra of **5e**.

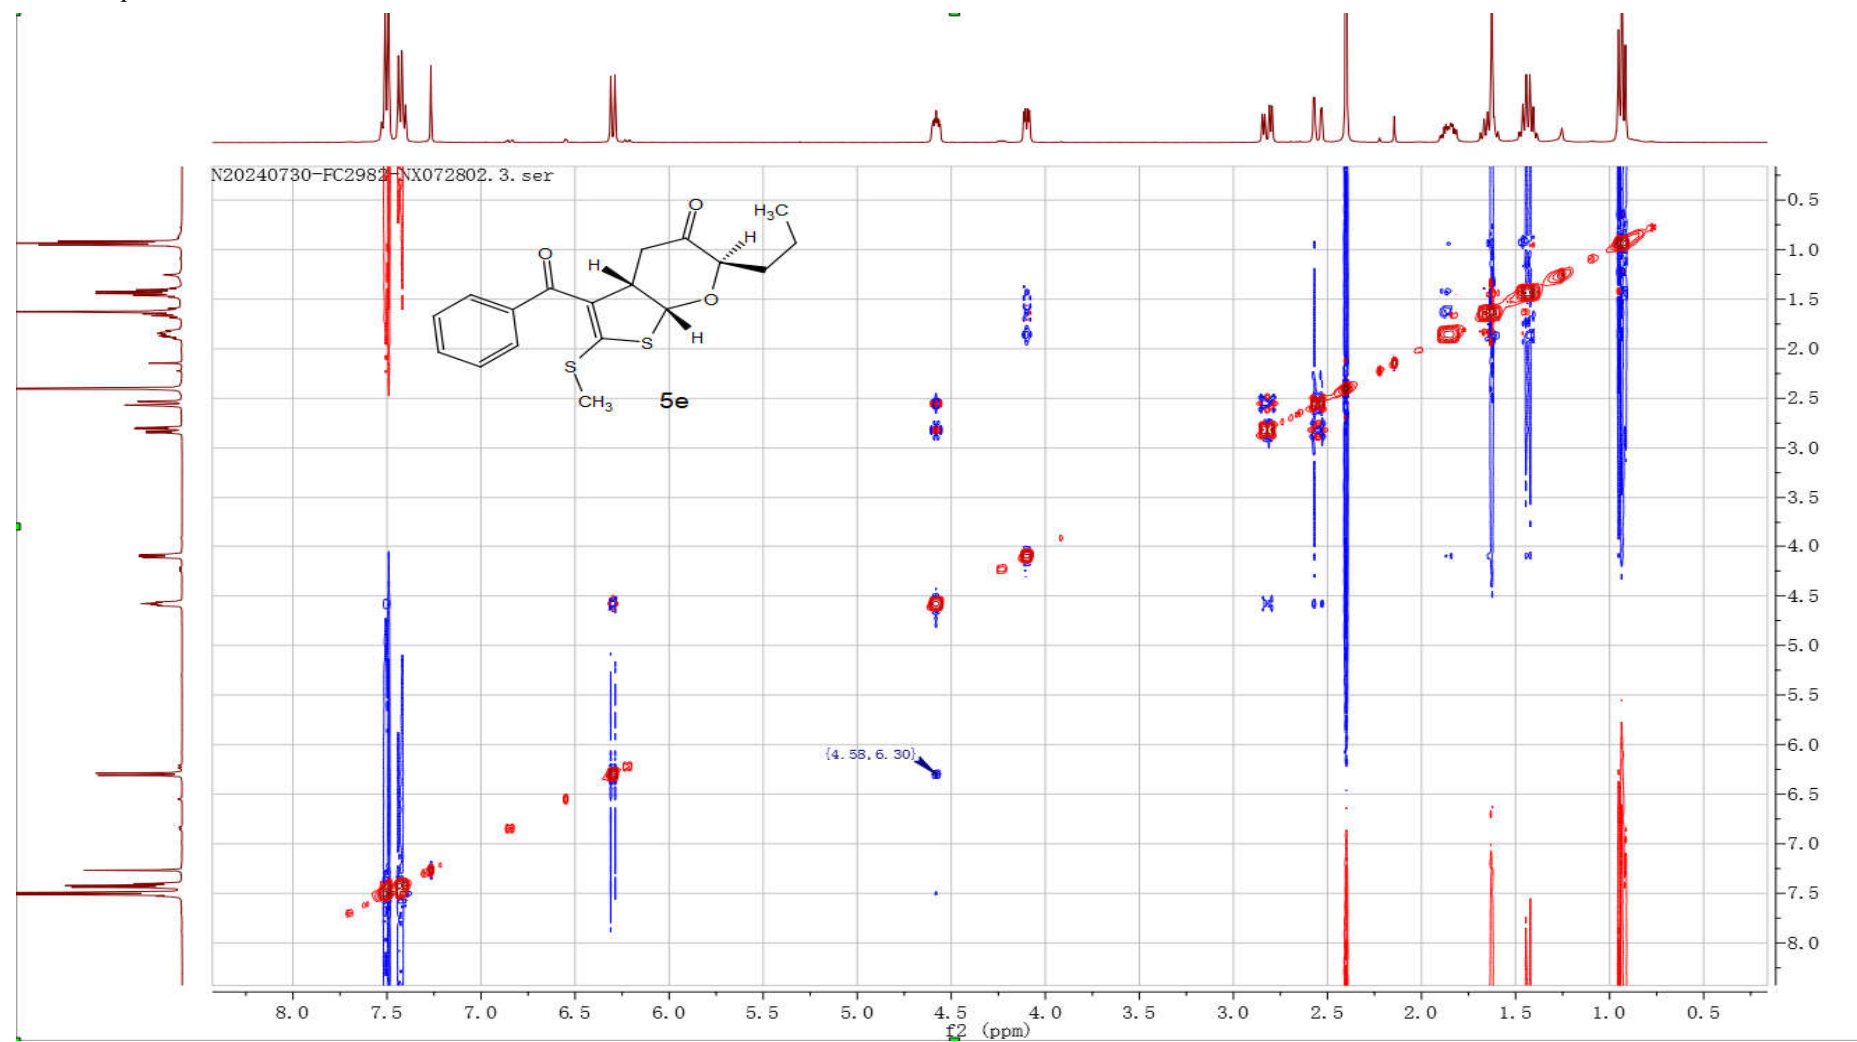

HRMS of 5e.

### Single Mass Analysis

Tolerance = 5.0 mDa / DBE: min = -1.5, max = 50.0

Element prediction: Off

Number of isotope peaks used for i-FIT = 3

Monoisotopic Mass, Even Electron Ions

2943 formula(e) evaluated with 1 results within limits (up to 50 best isotopic matches for each mass)

Elements Used:

C: 18-18 H: 20-20 N: 0-100 O: 0-100 Na: 0-4 S: 1-4

29

240910-5-647-1-5E 22 (0.152)

1: TOF MS ES+  
6.02e+005

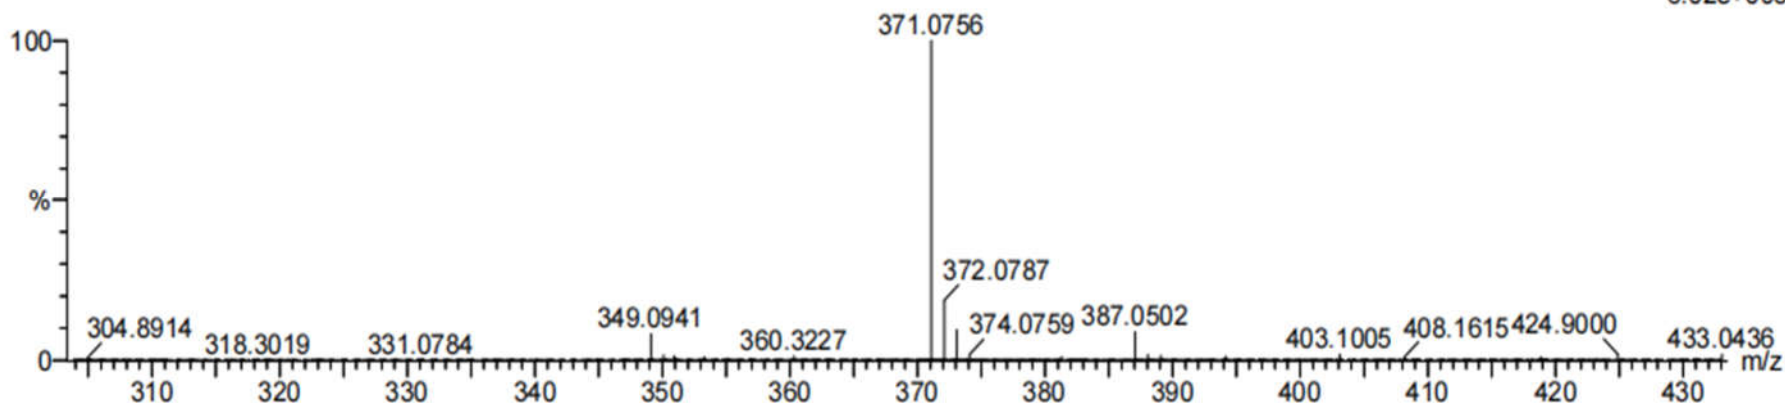

Minimum: -1.5  
Maximum: 5.0 10.0 50.0

| Mass     | Calc. Mass | mDa | PPM | DBE | i-FIT | Norm | Conf(%) | Formula          |
|----------|------------|-----|-----|-----|-------|------|---------|------------------|
| 371.0756 | 371.0752   | 0.4 | 1.1 | 8.5 | 820.1 | n/a  | n/a     | C18 H20 O3 Na S2 |

<sup>1</sup>H spectra of **5f**.

NX070401

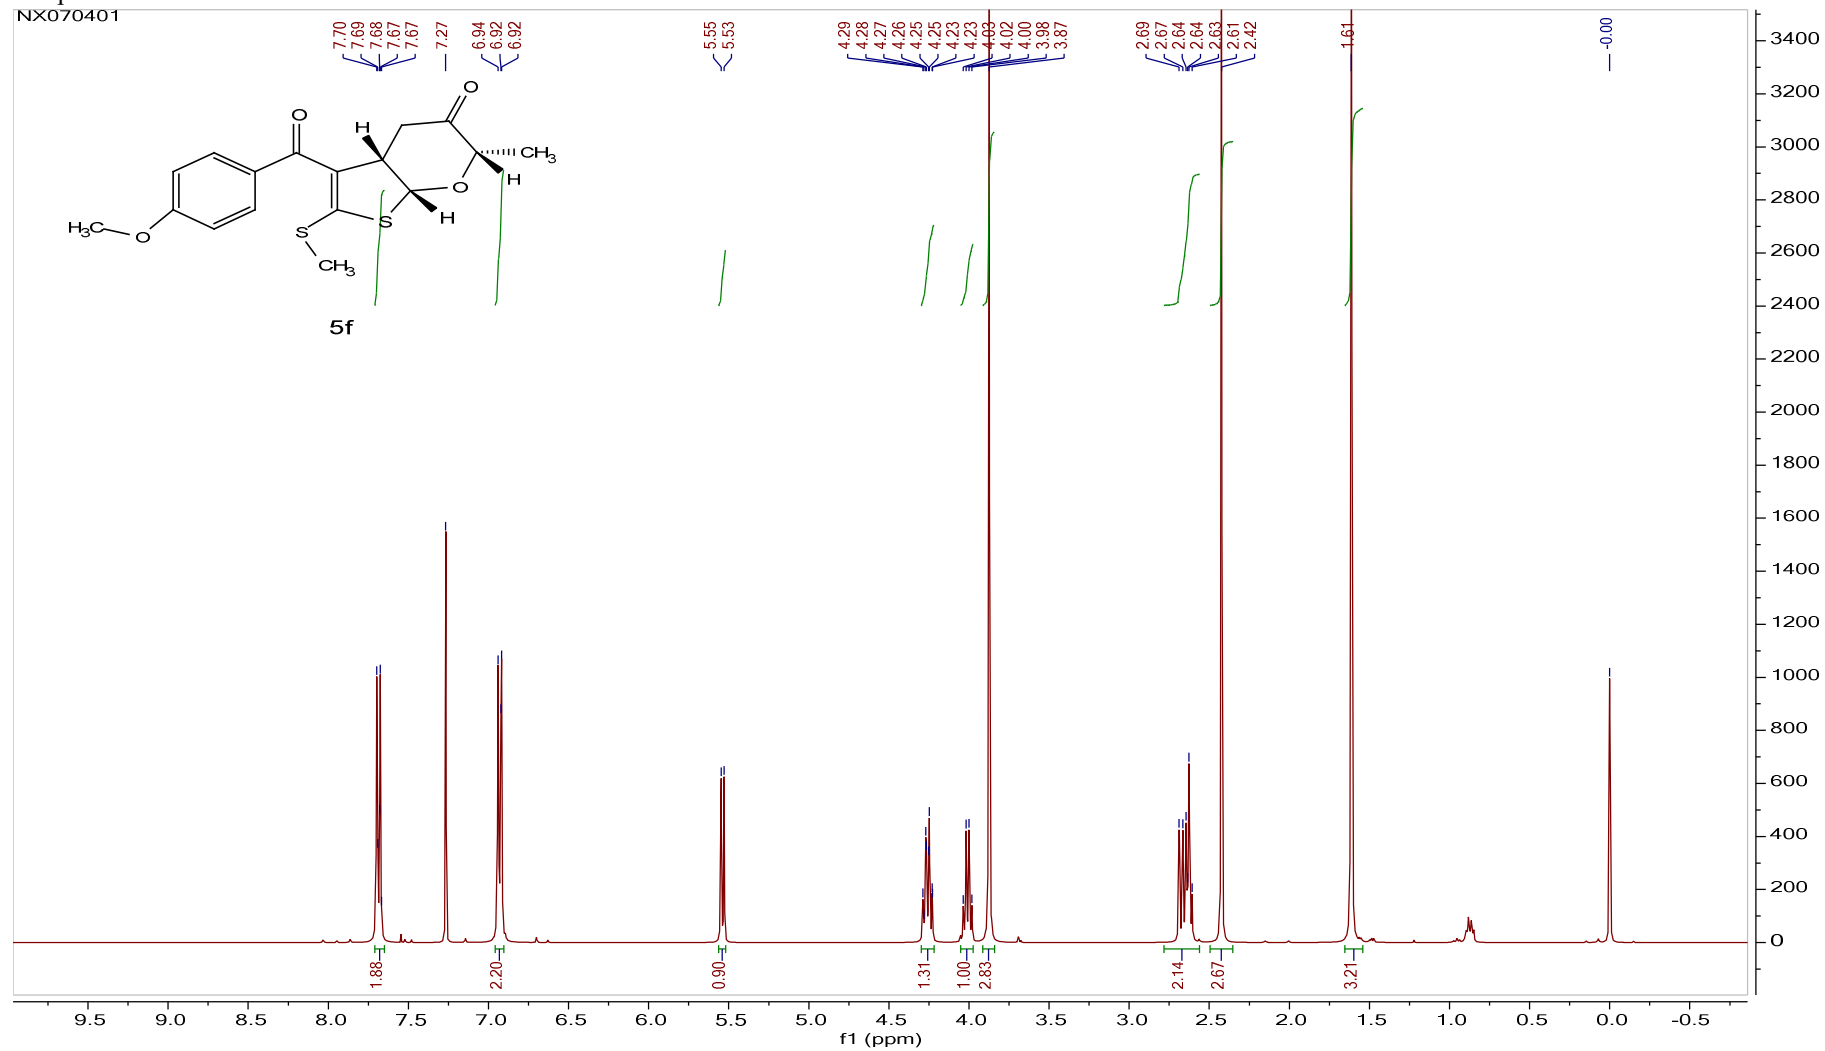

<sup>13</sup>C spectra of **5f**.

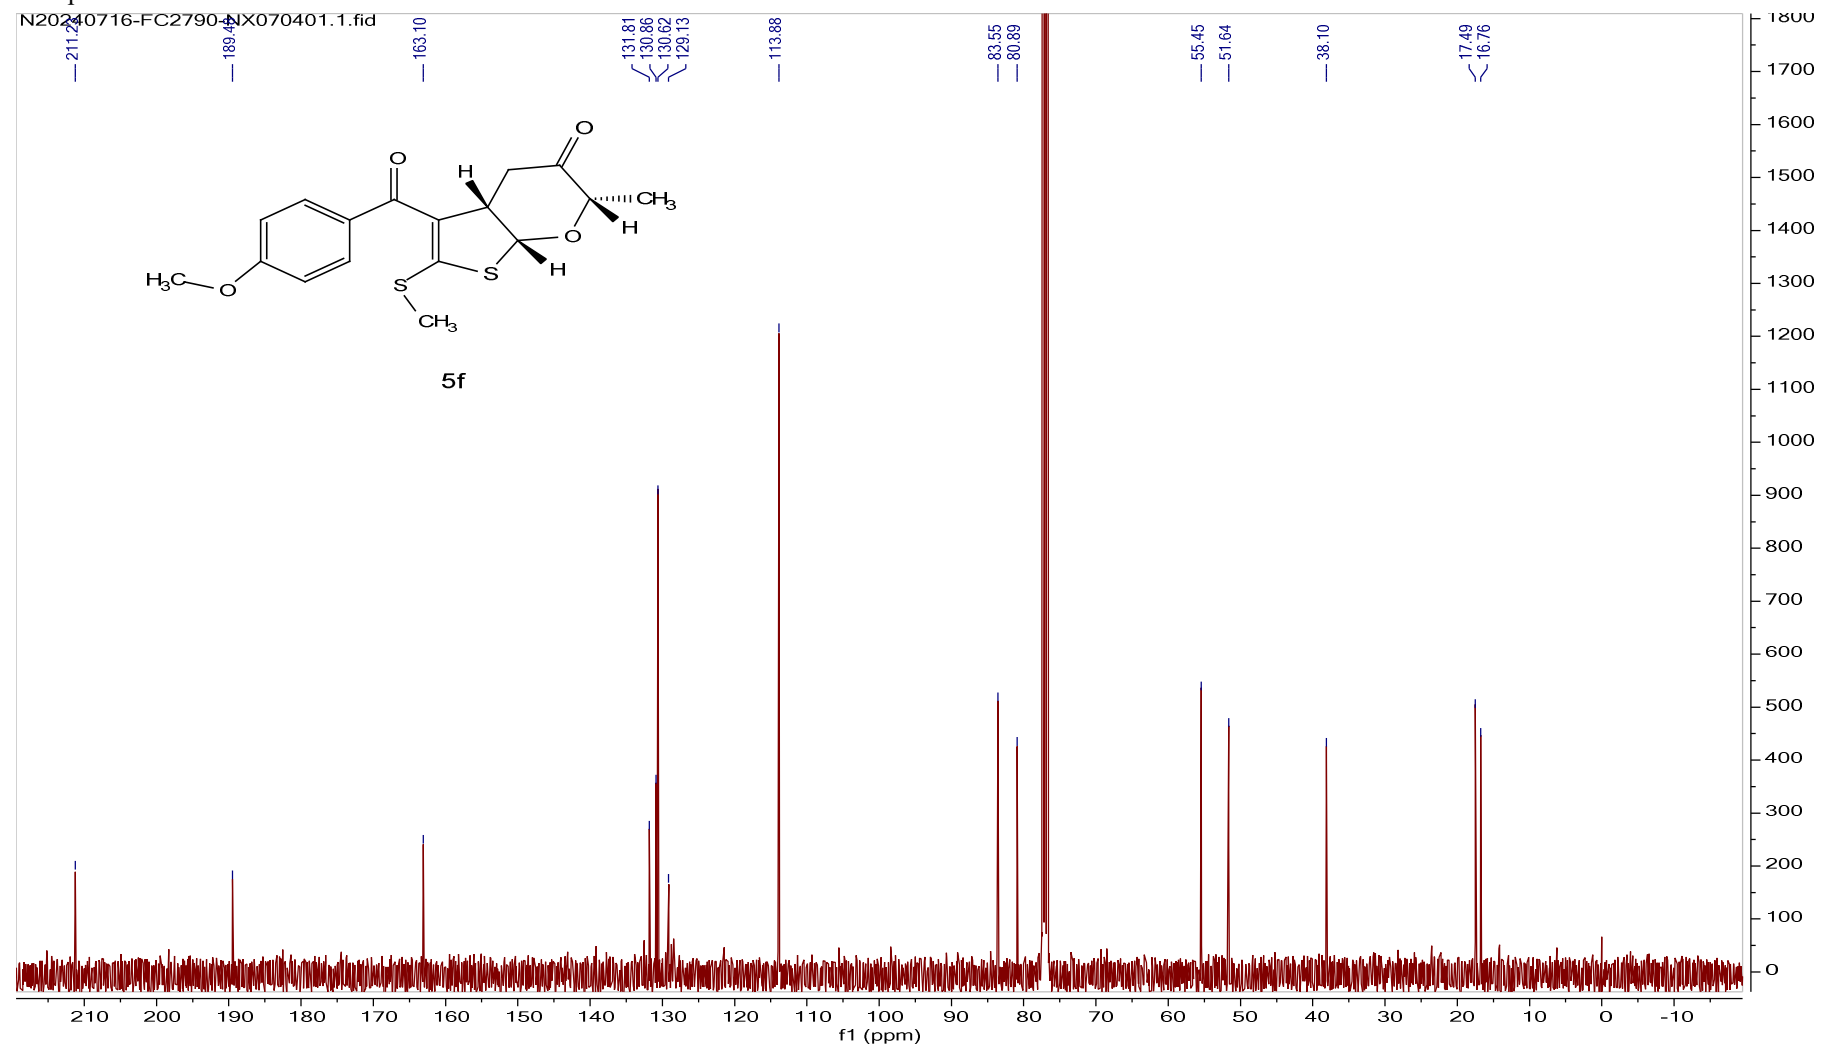

HRMS of 5f.

### Single Mass Analysis

Tolerance = 5.0 mDa / DBE: min = -1.5, max = 50.0

Element prediction: Off

Number of isotope peaks used for i-FIT = 3

Monoisotopic Mass, Even Electron Ions

2940 formula(e) evaluated with 1 results within limits (up to 50 best isotopic matches for each mass)

Elements Used:

C: 17-17 H: 18-18 N: 0-100 O: 0-100 Na: 0-4 S: 1-4

29

240910-5-647-1-5F 21 (0.147)

1: TOF MS ES+  
5.14e+005

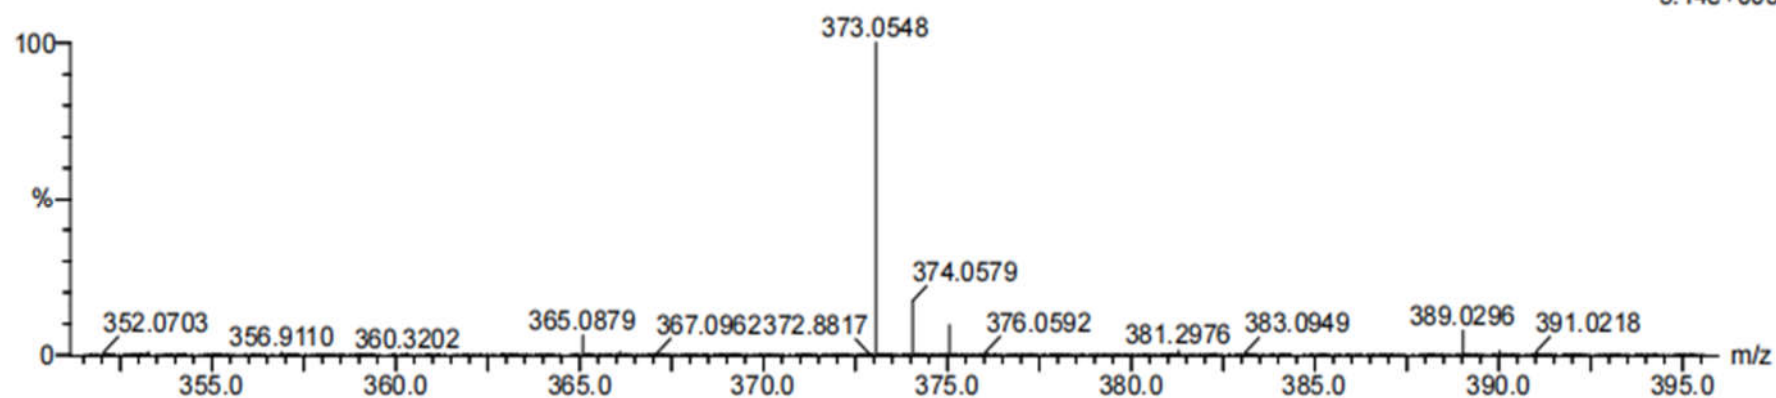

Minimum: -1.5  
Maximum: 5.0 10.0 50.0

| Mass     | Calc. Mass | mDa | PPM | DBE | i-FIT | Norm | Conf(%) | Formula          |
|----------|------------|-----|-----|-----|-------|------|---------|------------------|
| 373.0548 | 373.0544   | 0.4 | 1.1 | 8.5 | 822.0 | n/a  | n/a     | C17 H18 O4 Na S2 |

<sup>1</sup>H spectra of **5g**.

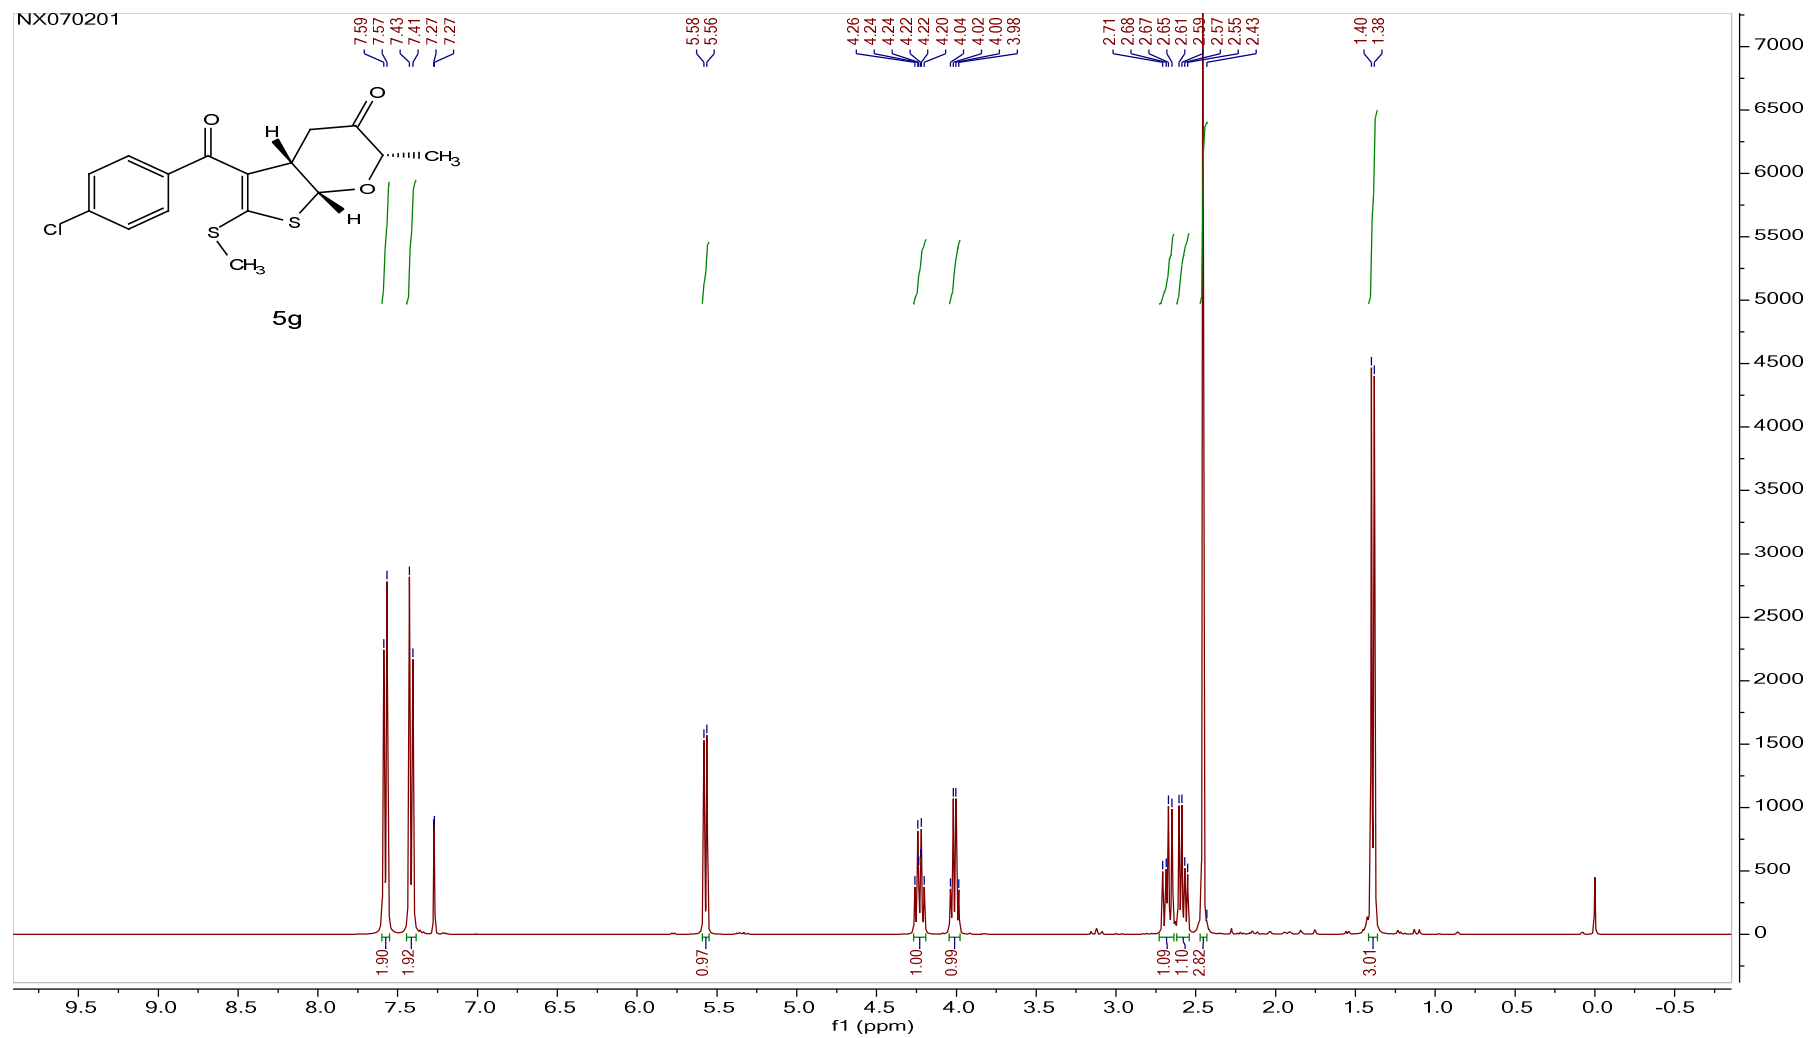

<sup>13</sup>C spectra of **5g**.

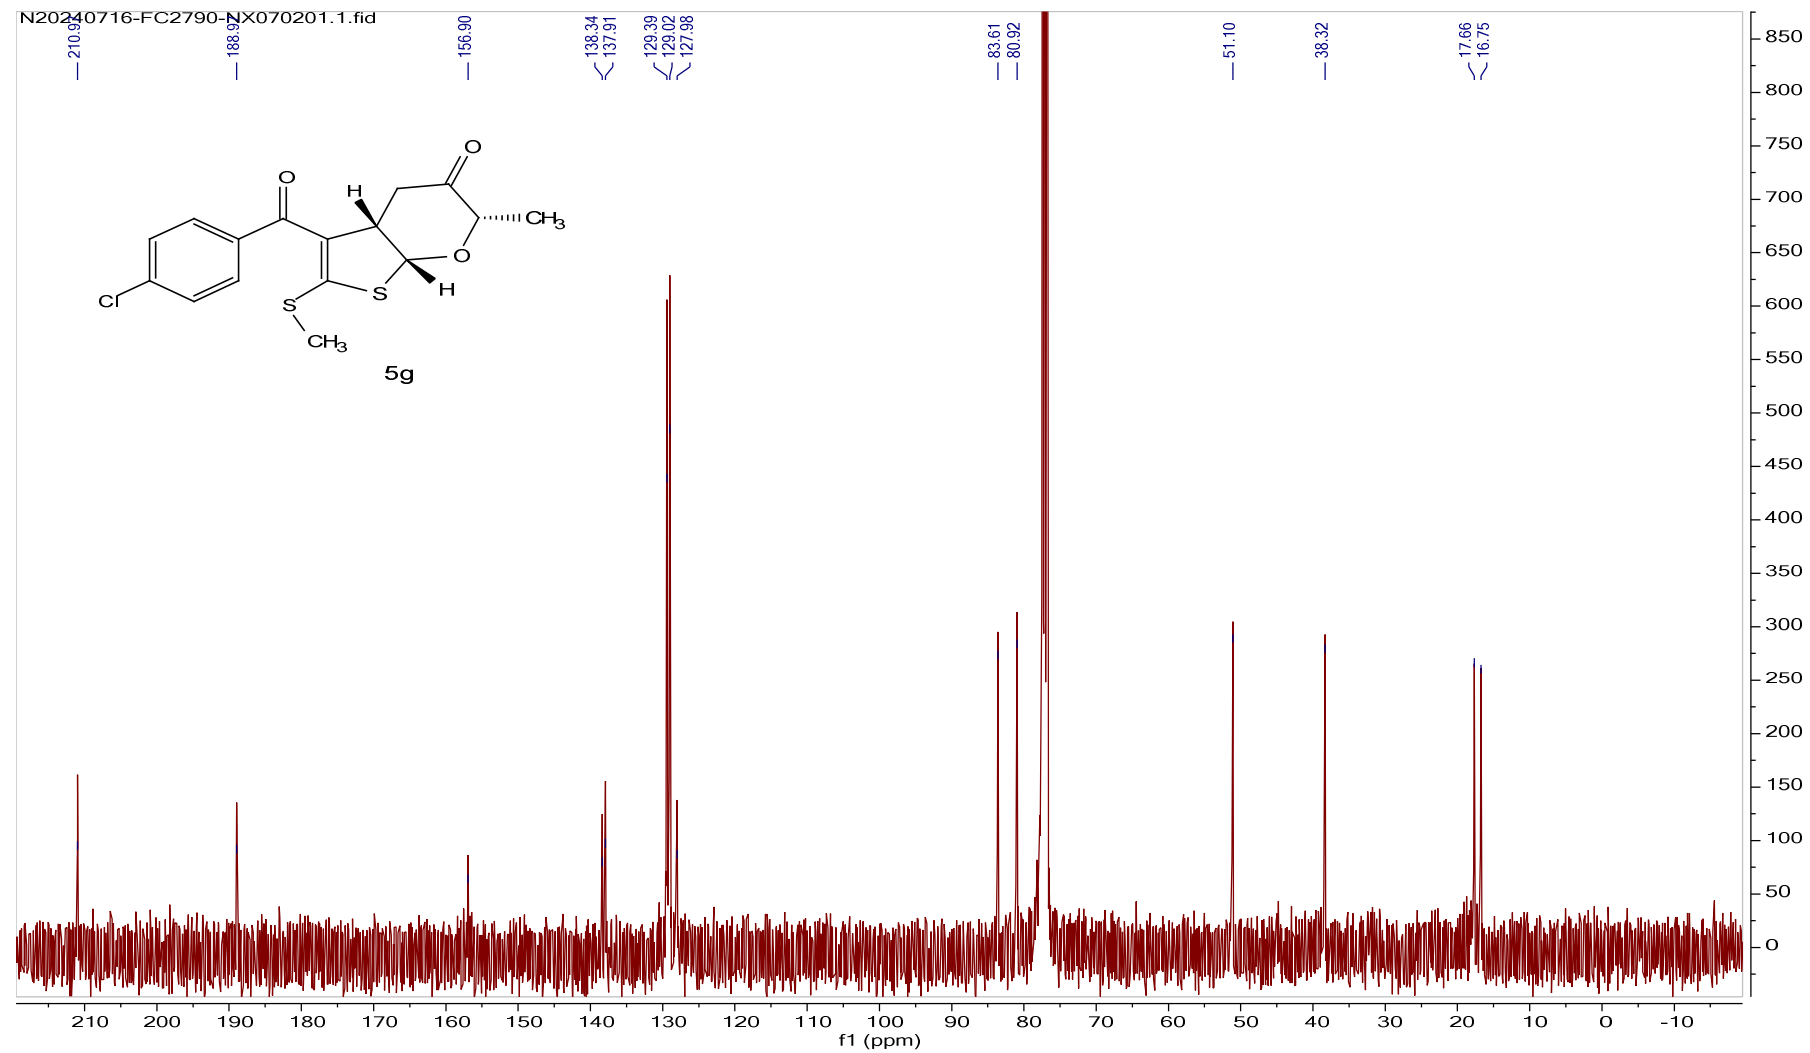



HRMS of 5g.

### Single Mass Analysis

Tolerance = 5.0 mDa / DBE: min = -1.5, max = 50.0

Element prediction: Off

Number of isotope peaks used for i-FIT = 3

Monoisotopic Mass, Even Electron Ions

5349 formula(e) evaluated with 1 results within limits (up to 50 best isotopic matches for each mass)

Elements Used:

C: 16-16 H: 15-15 N: 0-100 O: 0-100 Na: 0-4 S: 1-4 Cl: 1-3

29

240910-5-647-1-5G 12 (0.100)

1: TOF MS ES+  
9.40e+005

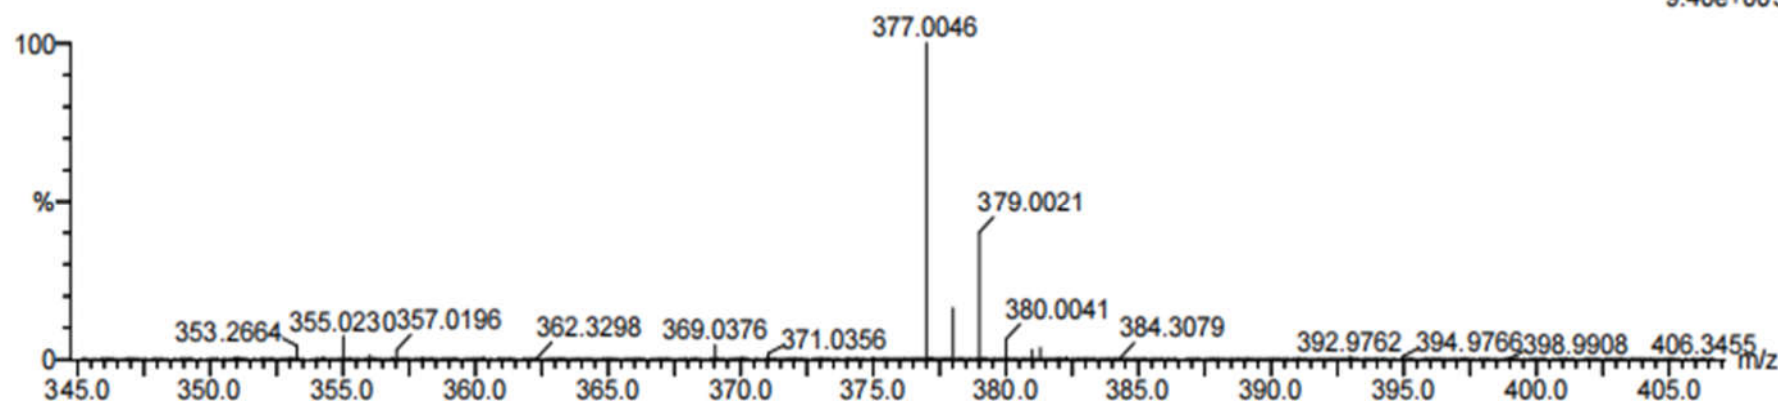

Minimum: -1.5  
Maximum: 5.0 10.0 50.0

| Mass     | Calc. Mass | mDa  | PPM  | DBE | i-FIT  | Norm | Conf (%) | Formula             |
|----------|------------|------|------|-----|--------|------|----------|---------------------|
| 377.0046 | 377.0049   | -0.3 | -0.8 | 8.5 | 1089.0 | n/a  | n/a      | C16 H15 O3 Na S2 Cl |

<sup>1</sup>H spectra of **5h**.

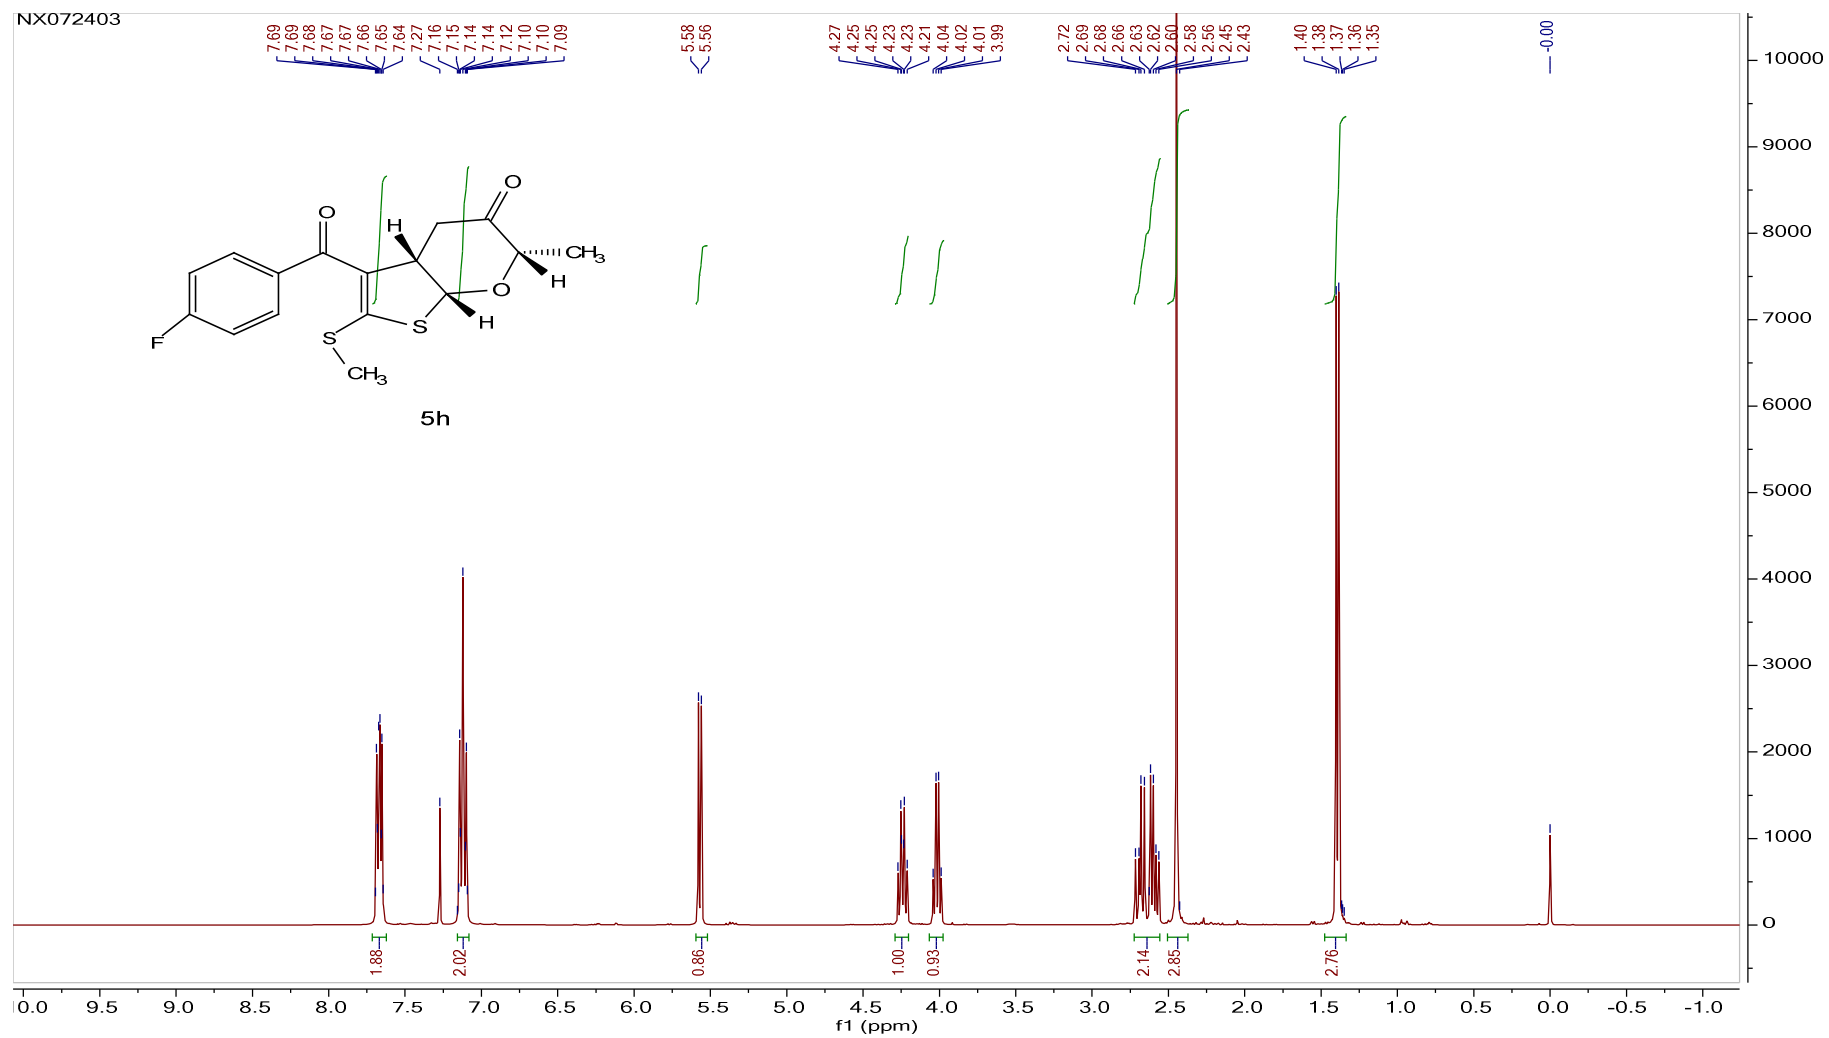

<sup>13</sup>C spectra of **5h**.

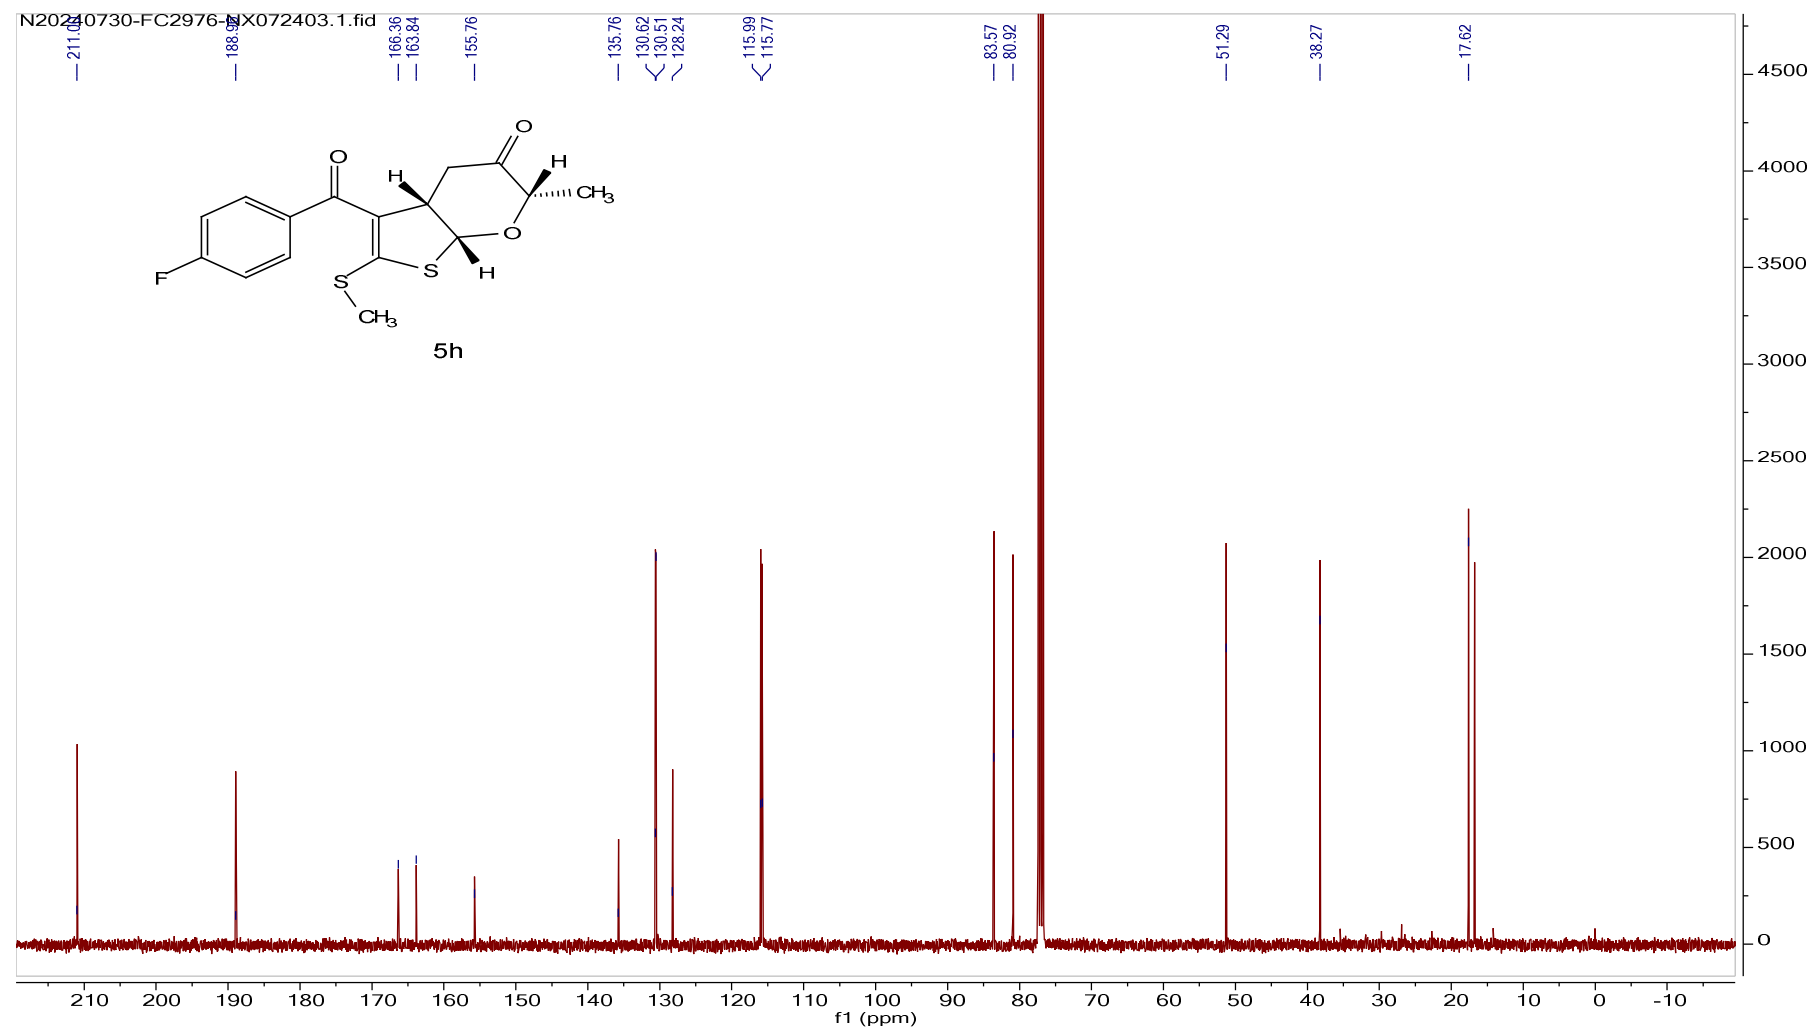

NOESY spectra of **5h**.

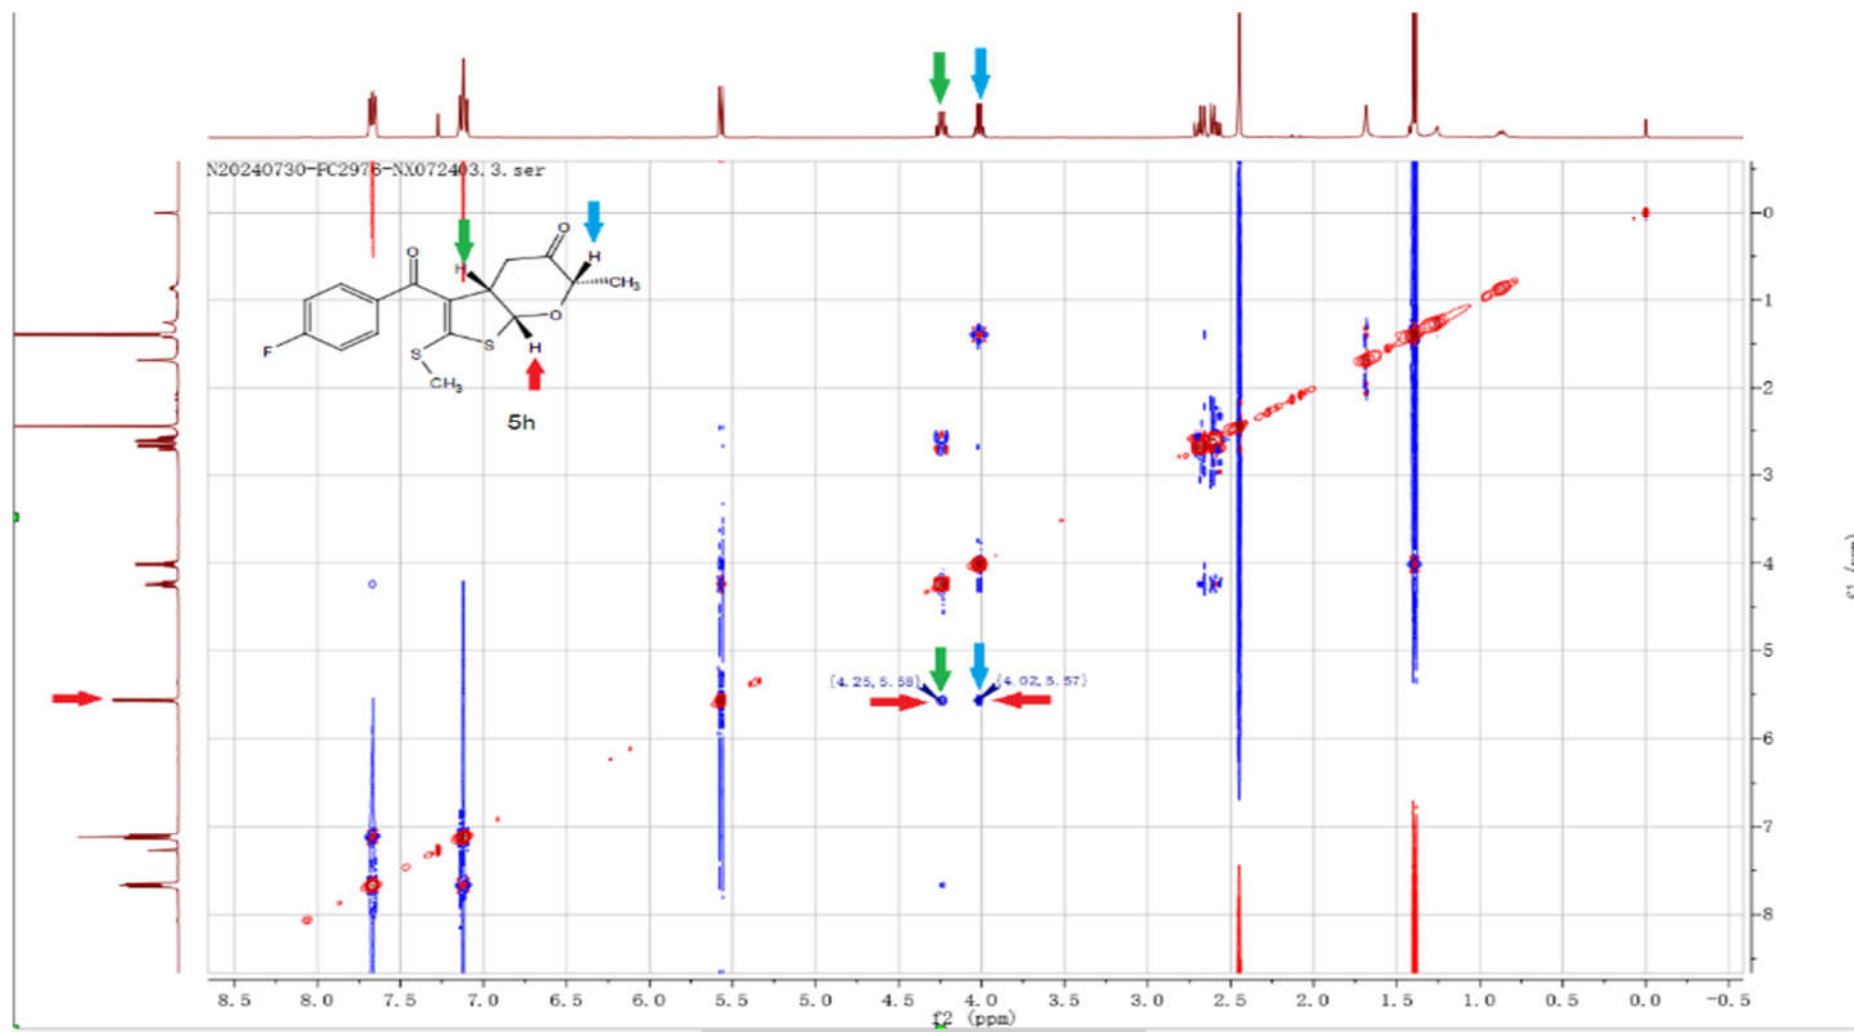

HRMS of 5h.

### Single Mass Analysis

Tolerance = 5.0 mDa / DBE: min = -1.5, max = 50.0

Element prediction: Off

Number of isotope peaks used for i-FIT = 3

Monoisotopic Mass, Even Electron Ions

2340 formula(e) evaluated with 1 results within limits (up to 50 best isotopic matches for each mass)

Elements Used:

C: 16-16 H: 15-15 N: 0-100 O: 0-100 Na: 0-4 S: 1-4 F: 1-1

29

240910-5-647-1-5H 23 (0.157)

1: TOF MS ES+  
9.22e+004

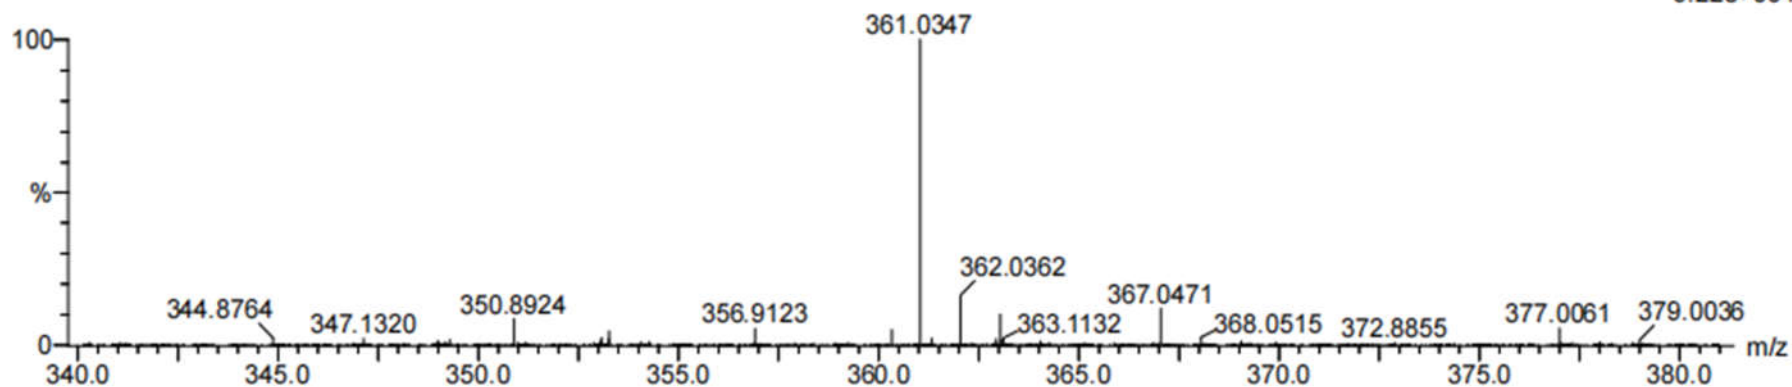

Minimum: -1.5  
Maximum: 5.0 10.0 50.0

| Mass     | Calc. Mass | mDa | PPM | DBE | i-FIT | Norm | Conf(%) | Formula            |
|----------|------------|-----|-----|-----|-------|------|---------|--------------------|
| 361.0347 | 361.0344   | 0.3 | 0.8 | 8.5 | 671.5 | n/a  | n/a     | C16 H15 O3 Na S2 F |

<sup>1</sup>H spectra of **5i**.

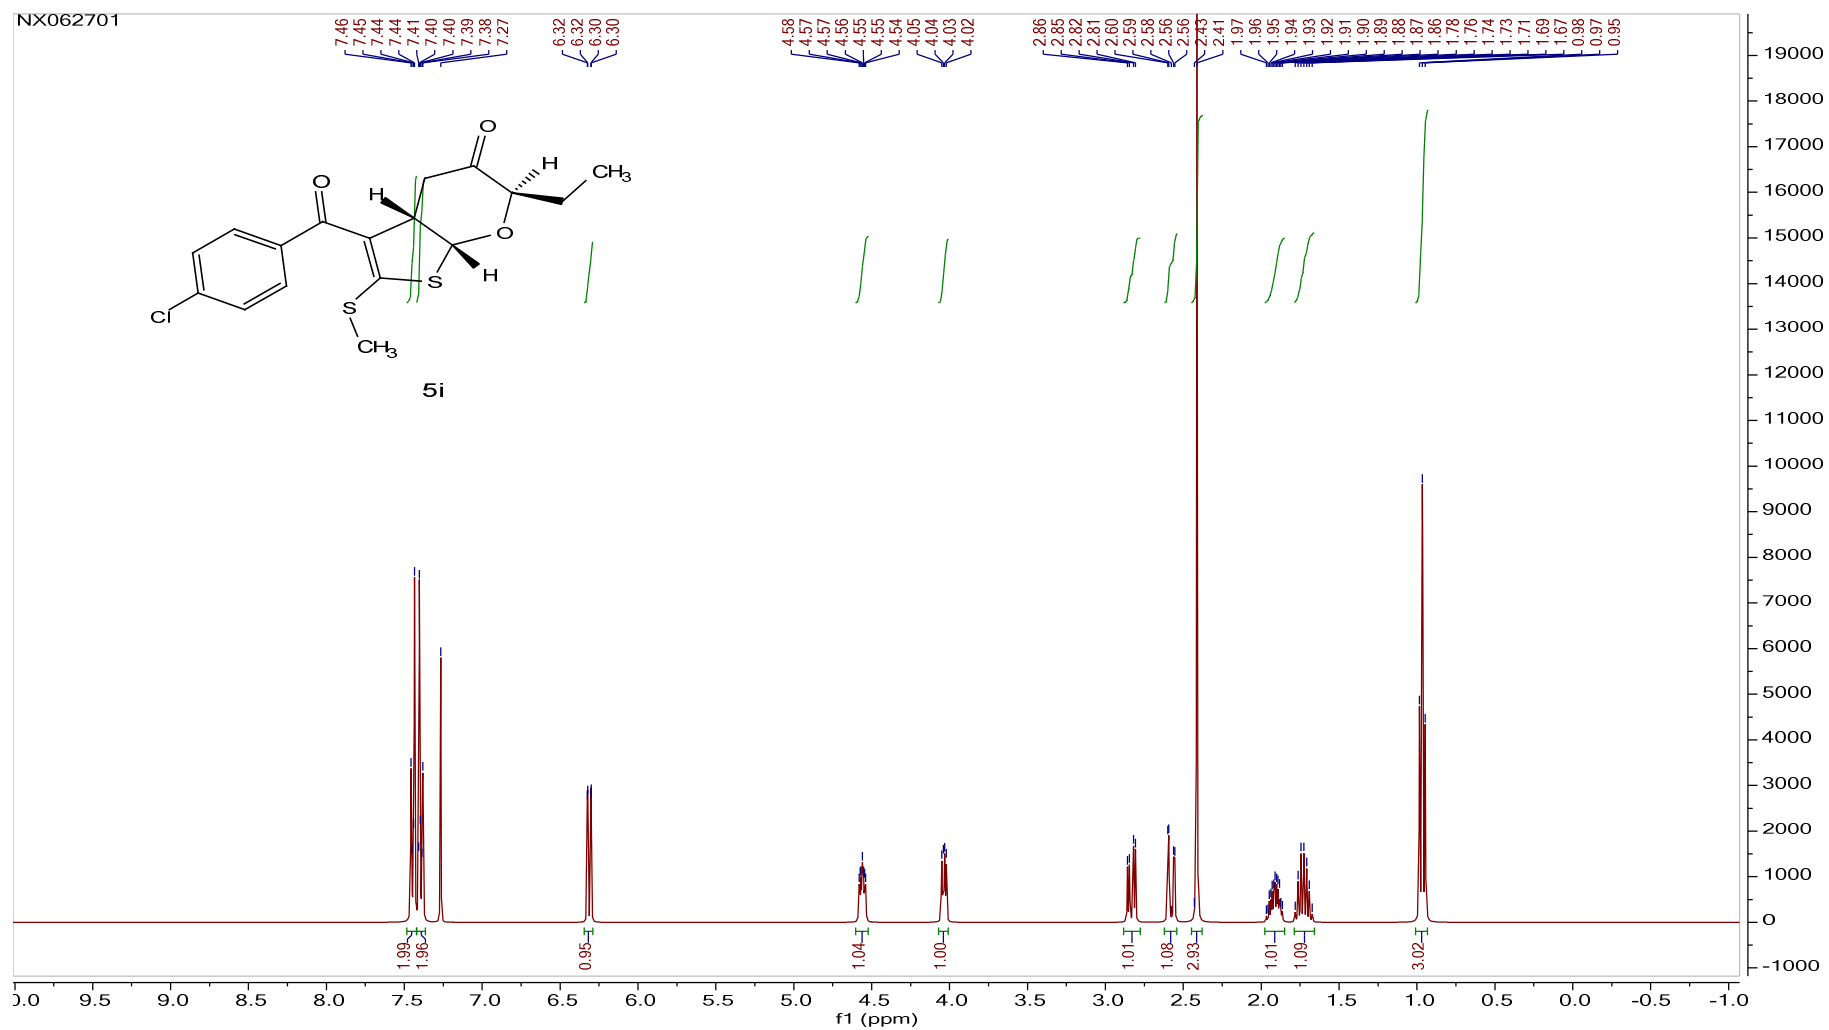

<sup>13</sup>C spectra of **5i**.

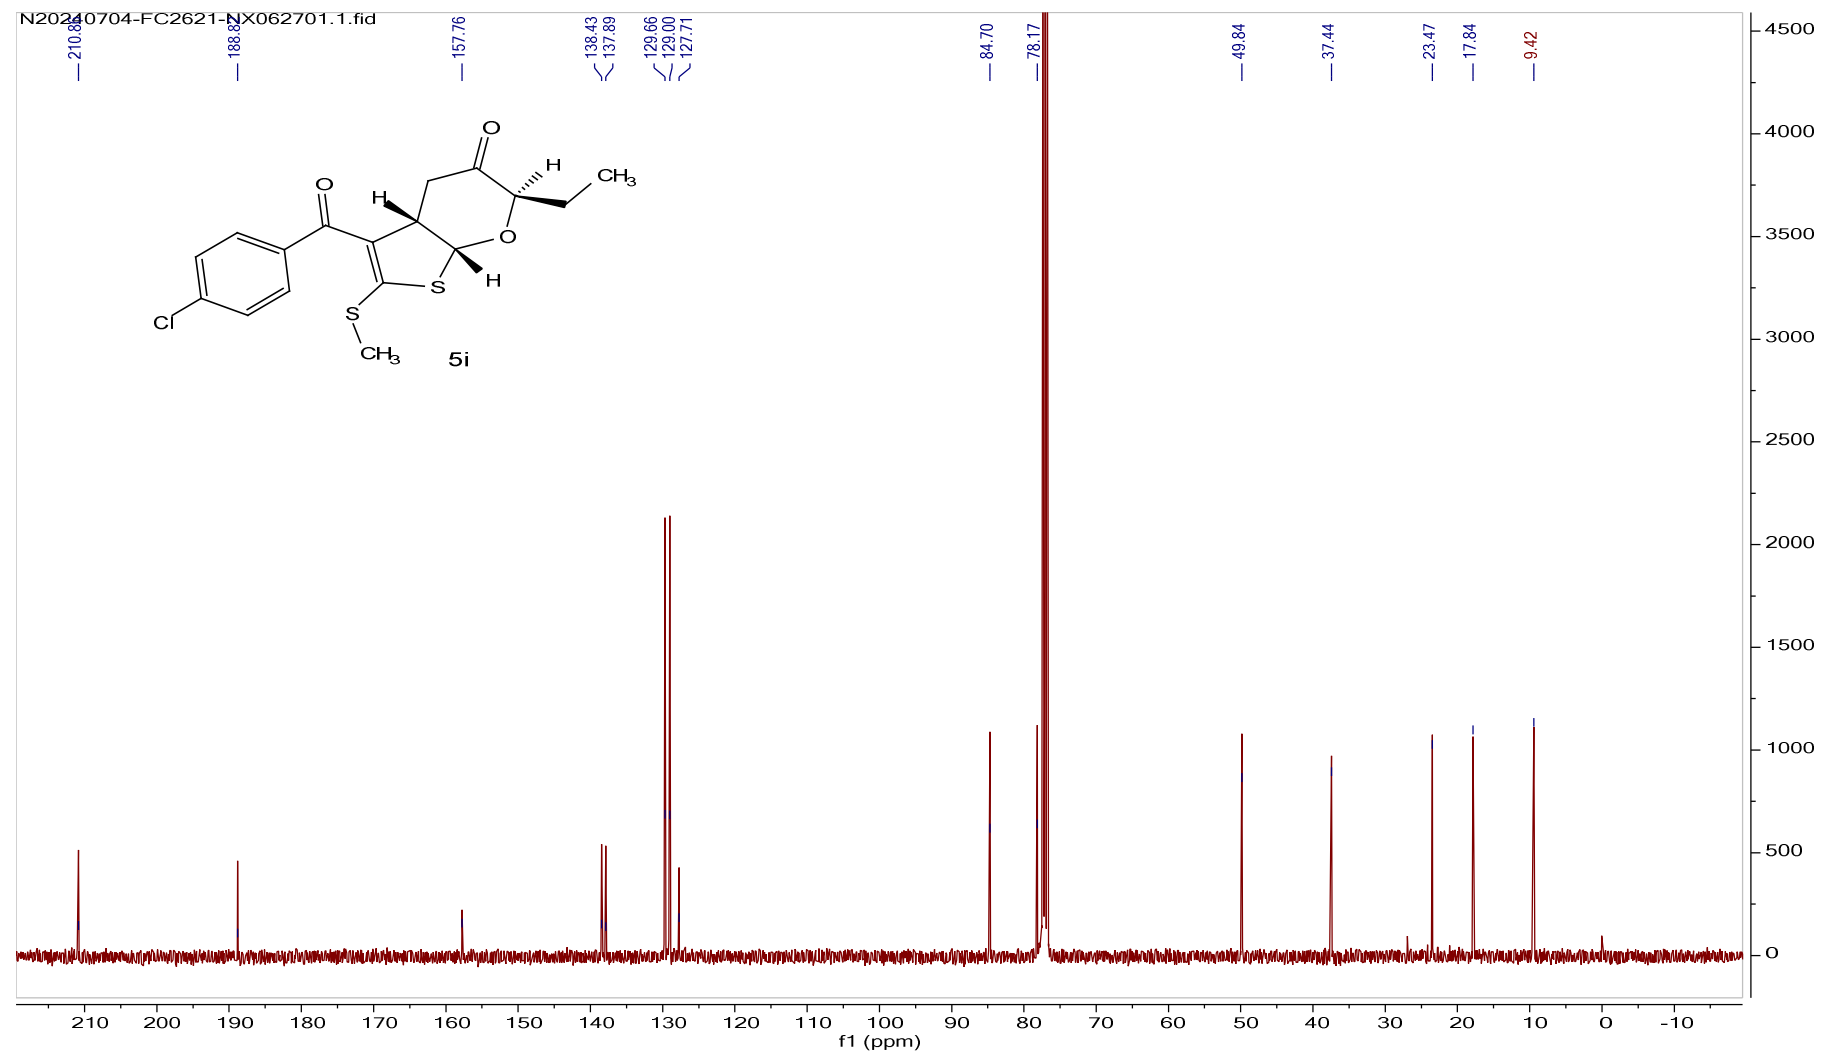

NOSEY spectra of **5i**.

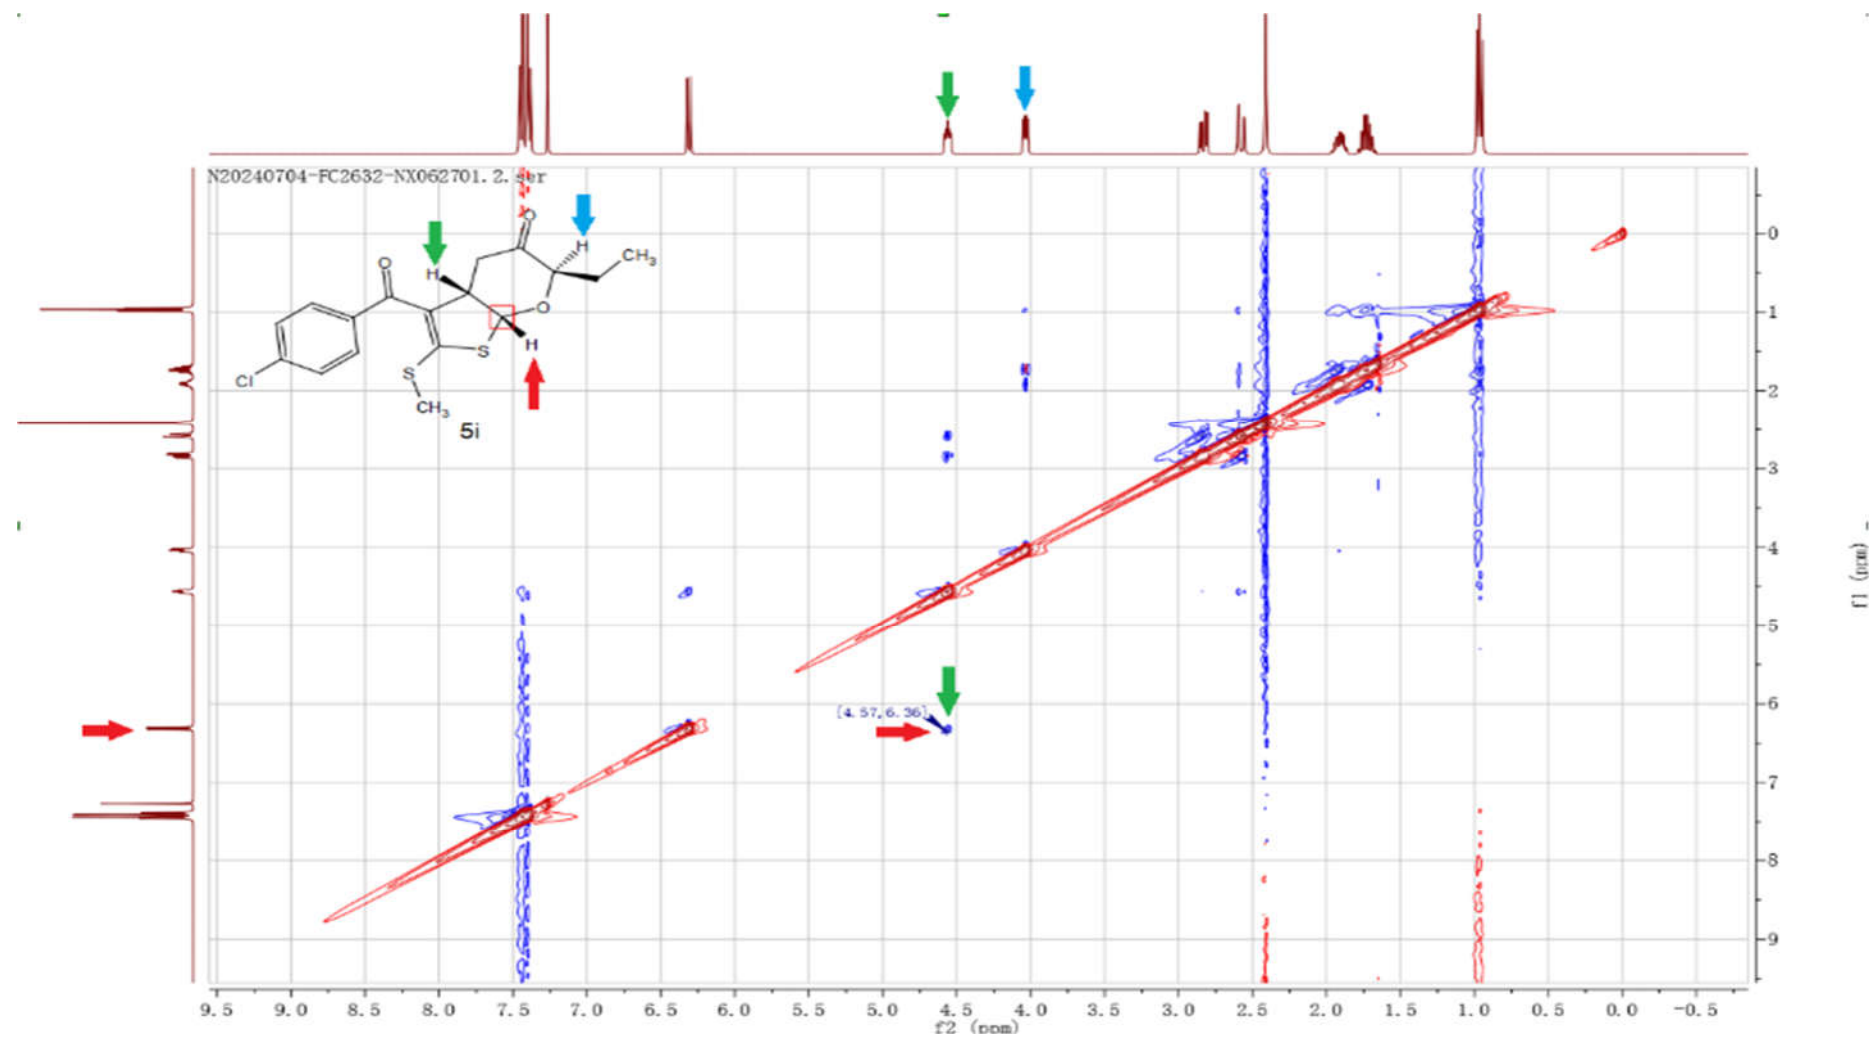



HRMS of 5i.

### Single Mass Analysis

Tolerance = 5.0 mDa / DBE: min = -1.5, max = 50.0

Element prediction: Off

Number of isotope peaks used for i-FIT = 3

Monoisotopic Mass, Even Electron Ions

6092 formula(e) evaluated with 1 results within limits (up to 50 best isotopic matches for each mass)

Elements Used:

C: 17-17 H: 17-17 N: 0-100 O: 0-100 Na: 0-4 S: 1-4 Cl: 1-3

29

240910-5-647-1-5J 15 (0.115)

1: TOF MS ES+  
1.39e+006

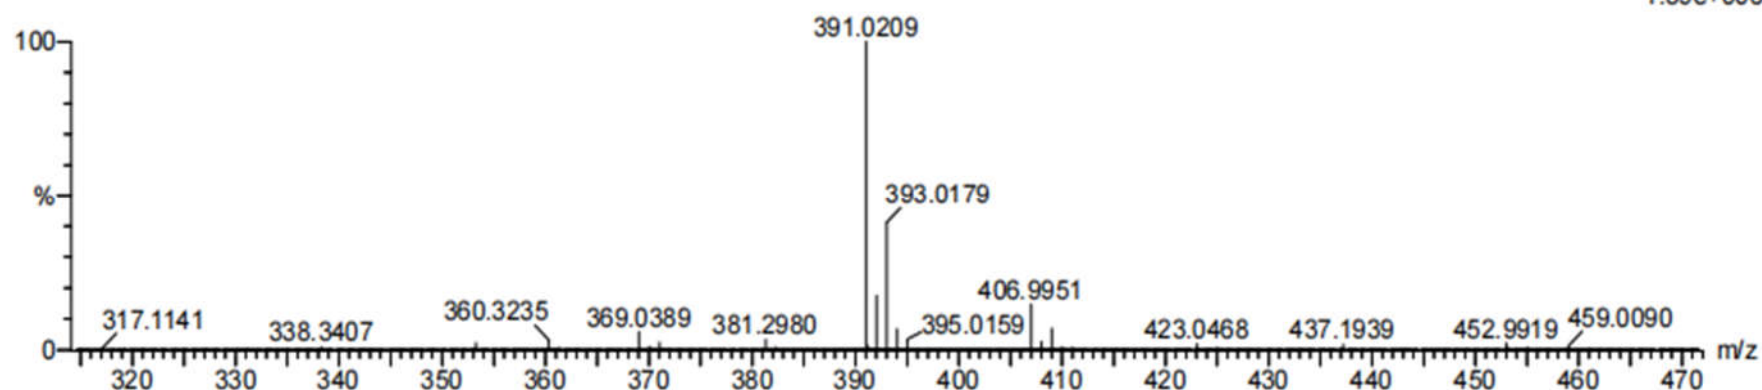

Minimum: -1.5  
Maximum: 5.0 10.0 50.0

| Mass     | Calc. Mass | mDa | PPM | DBE | i-FIT  | Norm | Conf (%) | Formula             |
|----------|------------|-----|-----|-----|--------|------|----------|---------------------|
| 391.0209 | 391.0205   | 0.4 | 1.0 | 8.5 | 1059.6 | n/a  | n/a      | C17 H17 O3 Na S2 Cl |

## References

- [1] (a) S. Borisova, S. Guppi, H. Kim, B. Wu, J. Penn, H. Liu and G. Doherty, *Org. Lett.* 2010, **12**, 5150-5153;  
(b) I. Paterson, and G.W. Haslett, *Org. Lett.*, 2013, **15**, 1338-1341.
- [2] A. Christoforow, J. Wilke, A. Binici, A. Pahl, C. Ostermann, S. Sievers, and H. Waldmann, *Angew. Chem. Int. Ed.*, 2019, **58**, 14715-14723.
- [3] S.T. Bhaskaran, and P. Mathew, *J. Mol. Struct.*, 2022, **1251**, 132071.
- [4] L.-R. Wen, W.-K. Yuan, and M. Li, *J. Org. Chem.*, 2015, **80**, 4942-4949.
